# Supplementary material for: IRF8 Governs Expression of Genes Involved in Innate and Adaptive Immunity in Human and Mouse Germinal Center B Cells
Source: PLoS One. 2011 Nov 11;6(11):e27384. doi: 10.1371/journal.pone.0027384 (PMC3214047; doi:10.1371/journal.pone.0027384)
Supplement: Table S1 — List of primers for ChIP-qPCR. (XLSX) [file pone.0027384.s002.xlsx]

## Sheet: Sheet1
TableS1. List of primers for ChIP-qPCR
Gene	Forward	Reverse
BANK1	5'GCGCAGAAGTGTTATAAGAAACCA3'	5'GCGCCCAGAGGAAGTGAAA3'
CD74	5'TTCCAGCCTTTGTAGCTTTCACT3'	5'GAGGAATCTGATTCGTCCACAGA3'
GNA13	5'GAGCCCTTCTGCCCACAAG3'	5'CGACTTTCTGTTTCCCTTTCATG3'
GPR18	5'GCTAAGTGTGACTTCATAAACAAATCATT3'	5'TGGTGCTGGGCTGACTTTAAT3'
HOXC8	5'AAGCAGGCAGCGCGTAAT3'	5'AGGTACCACGGATTTATGTTCGTT3'
IFIH1	5'GTTTCCCGCGGTGTCCTTA3'	5'GGAGACGCCACCTTTTGGT3'
LGP2	5'CCCCTCAGTTTCAGTTTCCATT3'	5'GGCGGCCCTGCTTAGC3'
LMO2	5'GGCAGCTGTCTCTTTAAATGTGATT3'	5'TCTGTCTCTGGTTTCATTTCCTTTT3'
LY86	5'CAGGCCCCCACCATGAA3'	5'ACTGCAGCTGGGAAAAATCAG3'
NR1H3	5'TGCTACTGGAGACCATAGGCAAA3'	5'CCCCACCACATACGTTGCTT3'
PSMB10	5'CGTGAAGCCTAGCAGAGGACTT3'	5'GGATGAGTCGGCCAGACAA3'
SP100	5'ACCGGGACACTCTAAACATAGCA3'	5'AGGGTTCACAGATCATGAGGAAA3'
TRIAD3	5'CAGCCTTCTTGCTTCCTAATTTG3'	5'TCCCTGTGCTTGTGTTGTTCTAA3'
TRIM21	5'TGTAAAGGTGAGTGAACCCCACTA3'	5'GACCGGCTCAAGGATGGA3'
TRIM38	5'ACGGAAAAGGTCCAGGCTAAG3'	5'CCACCCCACTTGCCATCA3'
