# Supplementary material for: IRF8 Governs Expression of Genes Involved in Innate and Adaptive Immunity in Human and Mouse Germinal Center B Cells
Source: PLoS One. 2011 Nov 11;6(11):e27384. doi: 10.1371/journal.pone.0027384 (PMC3214047; doi:10.1371/journal.pone.0027384)
Supplement: Table S2 — List of direct IRF8 targets in human GC B cell lines. FDR(false discovery rate) is <0.05. Score is the fold enrichment of ChIP to input in log2. (XLSX) [file pone.0027384.s003.xlsx]

## Sheet: nr_listofpeakinhuman
TableS2. List of direct IRF8 targets in human GC B cell lines.
			LY1				ODH1				VAL
Name	CHROMOSOME	STRAND	START	END	SCORE	FDR	START	END	SCORE	FDR	START	END	SCORE	FDR	Interferome	Description	Entrez	Synonyms
G1P2	chr1	+	938441	938790	1.42	0	938441	938790	2.55	0	938441	938790	1.68	0	*	interferon, alpha-inducible protein (clone IFI-15K)	9636	IFI15|ISG15|UCRP
SLC2A5	chr1	-	9052183	9052532	1.2	0.00607	9052183	9052632	2.73	0	9052183	9052632	2.09	0	*	solute carrier family 2 (facilitated glucose/fructose transporter), member 5	6518	GLUT5
SYTL1	chr1	+	27540599	27541048	1.14	0.00694	27540399	27540748	1.92	0	27540499	27540948	1.43	0	*	synaptotagmin-like 1	84958	FLJ14996|JFC1|SLP1|exophilin-7
G1P3	chr1	-	27871312	27871661	1.2	0.00607	27871312	27871661	2.86	0	27871312	27871661	2.16	0	*	interferon, alpha-inducible protein (clone IFI-6-16)	2537	6-16|IFI616
ADORA3	chr1	-	111849983	111850332	1.17	0.00619	111849983	111850332	2.46	0	111849983	111850332	1.83	0		adenosine A3 receptor	140	A3AR|AD026|RP11-552M11.7|bA552M11.5
MOV10	chr1	+	113018838	113019287	1.23	0.00405	113018838	113019287	2.55	0	113018838	113019187	1.68	0	*	Mov10, Moloney leukemia virus 10, homolog (mouse)	4343	FLJ32791|KIAA1631|gb110
ITGA10	chr1	+	144233846	144234195	1.1	0.0077	144233846	144234295	2.41	0	144233846	144234195	1.24	0		integrin, alpha 10	8515	PRO827
TARSL1	chr1	+	148726323	148726672	1.1	0.0077	148726223	148726672	1.56	0	148726223	148726572	0.73	0.03		threonyl-tRNA synthetase-like 1	80222	FLJ12528
MEF2D	chr1	-	154729065	154729414	1.61	0	154728865	154729414	2.68	0	154729265	154729614	1.57	0		MADS box transcription enhancer factor 2, polypeptide D (myocyte enhancer factor 2D)	4209	-
FCRLM2	chr1	+	159955358	159955607	1.64	0	159955558	159956016	1.12	0.00921	159955358	159955607	1.98	0		Fc receptor-like and mucin-like 2	127943	FCRL2|FCRLY|FREB-2|FcRY|RP11-474I16.6
TOR1AIP1	chr1	+	178118409	178118758	0.91	0.02	178118409	178118858	2.1	0	178118409	178118858	1.46	0		torsin A interacting protein 1	26092	DKFZP586G011|FLJ13142|LAP1B|MGC3413
TOR1AIP2	chr1	-	178118409	178118758	0.91	0.02	178118409	178118858	2.1	0	178118409	178118858	1.46	0		torsin A interacting protein 2	163590	LULL1|MGC126581|MGC138430|RP11-12M5.5
SMG7	chr1	+	181705275	181706124	0.76	0.02	181705975	181706324	1.74	0	181705975	181706324	1.83	0		Smg-7 homolog, nonsense mediated mRNA decay factor (C. elegans)	9887	C1orf16|EST1C|FLJ23717|KIAA0250|SGA56M|SMG-7
FLJ20054	chr1	-	195747467	195748125	1.14	0.00694	195747567	195748426	0.89	0.04	195747467	195748021	0.91	0.00178		hypothetical protein FLJ20054	54530	DKFZp547O0715
ATP6V1G3	chr1	-	196778877	196779636	1.23	0.00915	196779477	196779832	2.68	0	196779477	196779832	1.21	0		ATPase, H+ transporting, lysosomal 13kDa, V1 subunit G3	127124	ATP6G3|MGC119810|MGC119813|Vma10
RP11-378J18.4	chr1	+	220884073	220884422	0.95	0.02	220884173	220884522	1.65	0.000363	220884273	220884722	1.28	0		C219-reactive peptide	375056	ARNT|FLJ21469|FLJ39207|KIAA0268|TANGO|UNQ6077
LGALS8	chr1	+	234754579	234755134	1.2	0	234754279	234755242	2.37	0	234754679	234755134	1.61	0		lectin, galactoside-binding, soluble, 8 (galectin 8)	3964	Gal-8|PCTA-1|PCTA1|Po66-CBP
LOC645721	chr1	-	234754579	234755134	1.2	0	234754279	234755242	2.37	0	234754679	234755134	1.61	0		hypothetical protein LOC645721	645721	-
C10orf64	chr10	+	49562726	49563175	0.48	0.02	49562726	49563075	0.78	0.03	49562726	49563075	1.39	0.000951		chromosome 10 open reading frame 64	159491	FLJ36288|FLJ45748|MGC40604
CSTF2T	chr10	-	53129395	53129852	0.82	0	53129595	53129946	0.86	0.01	53129595	53129946	2.09	0		cleavage stimulation factor, 3' pre-RNA, subunit 2, 64kDa, tau variant	23283	CstF-64T|DKFZp434C1013|KIAA0689
ARID5B	chr10	+	63329548	63330506	0.38	0.02	63329648	63330307	0.9	0.00543	63329848	63330904	1.11	0.00513		AT rich interactive domain 5B (MRF1-like)	84159	FLJ21150|MRF2
IFIT2	chr10	+	91051282	91052131	0.38	0.00632	91051482	91052340	1.76	0	91051482	91051931	2.18	0	*	interferon-induced protein with tetratricopeptide repeats 2	3433	G10P2|GARG-39|IFI-54|IFI54|ISG-54K|cig42
IFIT3	chr10	+	91082105	91082759	0.52	0.00533	91082105	91082469	2.03	0	91082005	91082469	2.51	0	*	interferon-induced protein with tetratricopeptide repeats 3	3437	CIG-49|GARG-49|IFI60|IFIT4|IRG2|ISG60|RIG-G
IFIT5	chr10	+	91164125	91164574	1.19	0	91163825	91164674	0.82	0.01	91163825	91164974	1.86	0	*	interferon-induced protein with tetratricopeptide repeats 5	24138	RI58
LIPA	chr10	-	91164125	91164574	1.19	0	91163825	91164674	0.82	0.01	91163825	91164974	1.86	0	*	lipase A, lysosomal acid, cholesterol esterase (Wolman disease)	3988	CESD|LAL
BTAF1	chr10	+	93674015	93674368	0.44	0.03	93673715	93674267	1.13	0	93674015	93674368	1.58	0		BTAF1 RNA polymerase II, B-TFIID transcription factor-associated, 170kDa (Mot1 homolog, S. cerevisiae)	9044	KIAA0940|MGC138406|MOT1|TAF(II)170|TAF172|TAFII170
BLNK	chr10	-	98020495	98021746	0.29	0.01	98020795	98022058	0.66	0.02	98020795	98021655	1.02	0.01	*	B-cell linker	29760	BASH|BLNK-s|Ly57|MGC111051|SLP-65|SLP65
BLNK	chr10	-	98023095	98023444	0.59	0.01	98023095	98023444	1.21	0	98023095	98023444	2.42	0	*	B-cell linker	29760	BASH|BLNK-s|Ly57|MGC111051|SLP-65|SLP65
CASP7	chr10	+	115429524	115429873	1.01	0	115429424	115429873	0.9	0.00501	115429424	115429773	1.53	0	*	caspase 7, apoptosis-related cysteine peptidase	840	CMH-1|ICE-LAP3|MCH3
LRRC27	chr10	+	133995892	133996241	0.8	0	133995892	133996961	1.09	0	133995992	133996641	1.58	0		leucine rich repeat containing 27	80313	-
LSP1	chr11	+	1830775	1831124	1.43	0	1830575	1831024	1.89	0	1830675	1831024	2.02	0		lymphocyte-specific protein 1	4046	WP34|pp52
TRIM21	chr11	-	4371123	4371472	0.66	0.00137	4371323	4371672	1.62	0	4371323	4371775	2.26	0	*	tripartite motif-containing 21	6737	RNF81|RO52|SSA|SSA1
PPFIBP2	chr11	+	7490325	7490675	1.65	0	7490225	7490675	1.93	0	7490325	7490675	2.49	0		PTPRF interacting protein, binding protein 2 (liprin beta 2)	8495	Cclp1|DKFZp781K06126|MGC42541
RPL27A	chr11	+	8660614	8660963	0.81	0	8660714	8661163	1.3	0	8660614	8661063	1.41	0		ribosomal protein L27a	6157	MGC87238
COPB	chr11	-	14478124	14478982	0.37	0.01	14478324	14478881	0.83	0.02	14478424	14478881	1.36	0.00113		coatomer protein complex, subunit beta	1315	DKFZp761K102|FLJ10341
FANCF	chr11	-	22603785	22604234	0.76	0	22603885	22604842	1.34	0	22603885	22604734	1.6	0		Fanconi anemia, complementation group F	2188	FAF|MGC126856
LMO2	chr11	-	33848008	33848459	0.48	0.02	33848108	33848459	1.42	0	33848008	33848357	1.5	0	*	LIM domain only 2 (rhombotin-like 1)	4005	RBTN2|RBTNL1|RHOM2|TTG2
ACP2	chr11	-	47226442	47226991	1.08	0	47226342	47226791	1.7	0	47226342	47226691	2.21	0		acid phosphatase 2, lysosomal	53	-
NR1H3	chr11	+	47226442	47226991	1.08	0	47226342	47226791	1.7	0	47226342	47226691	2.21	0		nuclear receptor subfamily 1, group H, member 3	10062	LXR-a|LXRA|RLD-1
UBE2L6	chr11	-	57091006	57091655	0.58	0.00523	57091106	57091455	1.18	0	57091106	57091455	1.5	0	*	ubiquitin-conjugating enzyme E2L 6	9246	MGC40331|RIG-B|UBCH8
FAM111A	chr11	+	58666831	58667180	1.08	0	58666731	58667180	1.34	0	58666731	58667080	2.21	0		family with sequence similarity 111, member A	63901	DKFZp686A06175|FLJ22794|KIAA1895
MPEG1	chr11	-	58736985	58737342	0.43	0.04	58736985	58737342	1.66	0	58736985	58737342	2.16	0	*	macrophage expressed gene 1	219972	MGC132657|MGC138435
MS4A1	chr11	+	59979557	59979906	1.74	0	59979557	59979906	1.85	0	59979457	59979906	2.73	0		membrane-spanning 4-domains, subfamily A, member 1	931	B1|Bp35|CD20|LEU-16|MGC3969|MS4A2|S7
SLC15A3	chr11	-	60476043	60476498	0.56	0.00742	60476243	60476892	0.79	0.03	60476043	60476498	1.93	0	*	solute carrier family 15, member 3	51296	FLJ26631|OCTP|PHT2|PTR3|hPTR3
LOC439914	chr11	+	63972221	63972570	0.6	0.01	63972221	63972570	2.05	0	63972221	63972772	1.93	0		hypothetical gene supported by NM_175889	439914	-
POLD4	chr11	-	66877515	66878064	0.7	0	66877515	66878064	1.11	0	66877815	66878164	1.36	0.00113		polymerase (DNA-directed), delta 4	57804	POLDS|p12
ACY3	chr11	-	67174656	67174905	0.64	0.01	67174656	67174905	1.34	0	67174656	67174905	1.83	0		aspartoacylase (aminocyclase) 3	91703	ACY-3|HCBP1|MGC9740
DCAL1	chr12	-	9779677	9779826	0.95	0.04	9779677	9779826	1.79	0	9779377	9779826	1.49	0.00516		dendritic cell-associated lectin-1	160365	-
CLEC7A	chr12	-	10174024	10174379	0.43	0.04	10173924	10174286	1.63	0	10173924	10174286	1.95	0	*	C-type lectin domain family 7, member A	64581	BGR|CLECSF12|DECTIN1
ETV6	chr12	+	11692954	11693407	0.51	0.01	11693254	11693803	0.78	0.03	11693154	11693506	1.3	0.00197	*	ets variant gene 6 (TEL oncogene)	2120	TEL
PPFIBP1	chr12	+	27567911	27568261	0.59	0.00523	27567611	27568061	0.82	0.02	27567911	27568261	1.44	0		PTPRF interacting protein, binding protein 1 (liprin beta 1)	8496	L2|hSGT2|hSgt2p
C12orf35	chr12	+	32004031	32004489	0.67	0.00137	32004031	32004489	1.24	0	32004031	32004489	1.53	0	*	chromosome 12 open reading frame 35	55196	FLJ10652|FLJ20696
LOC645665	chr12	-	32004031	32004489	0.67	0.00137	32004031	32004489	1.24	0	32004031	32004489	1.53	0		hypothetical protein LOC645665	645665	-
LOC642606	chr12	-	38906283	38906643	0.79	0	38905383	38906643	0.74	0.02	38906283	38906643	2.09	0		hypothetical protein LOC642606	642606	-
FKBP11	chr12	-	47604999	47605348	0.87	0	47605099	47605548	0.93	0.00392	47605099	47605548	1.72	0	*	FK506 binding protein 11, 19 kDa	51303	FKBP19|MGC54182
C12orf62	chr12	+	48792294	48792843	0.73	0	48792594	48792843	1.4	0	48792594	48792843	1.72	0		chromosome 12 open reading frame 62	84987	MGC14288
BIN2	chr12	-	50006755	50007104	0.57	0.00742	50006855	50007104	1.13	0	50006855	50007104	1.58	0.00416		bridging integrator 2	51411	BRAP-1
HOXC8	chr12	+	52686457	52686808	0.83	0	52686357	52686708	2.06	0	52686357	52686708	2.23	0		homeobox C8	3224	HOX3|HOX3A
DGKA	chr12	+	54609345	54610301	1.03	0	54609345	54609794	2.21	0	54609345	54610301	2.42	0		diacylglycerol kinase, alpha 80kDa	1606	DAGK|DAGK1|DGK-alpha|MGC12821|MGC42356
WIBG	chr12	-	54609345	54610301	1.03	0	54609345	54609794	2.21	0	54609345	54610301	2.42	0		within bgcn homolog (Drosophila)	84305	MGC13064|PYM
STAT2	chr12	-	55040374	55040623	1.42	0	55040374	55040623	1.59	0	55040374	55040623	1.58	0.00416	*	signal transducer and activator of transcription 2, 113kDa	6773	ISGF-3|MGC59816|P113|STAT113
KIAA1033	chr12	+	104026142	104026401	1.05	0	104026142	104026401	1.63	0	104026142	104026401	1.95	0		KIAA1033	23325	-
TMEM116	chr12	-	110936849	110937101	1.78	0	110936749	110937101	1.86	0	110936749	110937101	1.91	0		transmembrane protein 116	89894	FLJ90167
OAS1	chr12	+	111829037	111829786	1.01	0	111829037	111829596	1.94	0	111829037	111829888	1.81	0	*	2',5'-oligoadenylate synthetase 1, 40/46kDa	4938	IFI-4|OIAS|OIASI
OAS3	chr12	+	111860231	111860680	0.73	0.000797	111860331	111860680	1.28	0	111860331	111860680	2	0	*	2'-5'-oligoadenylate synthetase 3, 100kDa	4940	MGC133260|p100
SDSL	chr12	+	112344198	112344447	0.55	0.03	112344298	112344547	1.16	0	112344198	112344447	1.3	0.01		serine dehydratase-like	113675	SDS-RS1
WSB2	chr12	-	116982839	116983218	0.45	0.03	116982539	116983088	1.01	0.000439	116982539	116983088	0.98	0.04		WD repeat and SOCS box-containing 2	55884	MGC10210|SBA2
UBC	chr12	-	123967699	123968051	0.81	0	123967699	123968148	1.98	0	123967599	123968051	2.46	0		ubiquitin C	7316	HMG20
CG018	chr13	-	31900420	31900769	0.51	0.01	31900620	31901177	0.94	0.00187	31900420	31900769	1.59	0		hypothetical gene CG018	90634	-
PFAAP5	chr13	-	32010665	32011118	0.75	0	32010365	32011214	0.94	0	32010665	32011118	1.59	0		phosphonoformate immuno-associated protein 5	10443	92M18.3|CG005
WBP4	chr13	+	40532595	40533344	0.85	0	40532495	40532850	0.94	0.00187	40532495	40533644	1.36	0		WW domain binding protein 4 (formin binding protein 21)	11193	FBP21|MGC117310
EPSTI1	chr13	-	42464116	42464565	0.45	0.03	42464416	42464868	0.76	0.03	42464416	42464868	1.17	0.00983	*	epithelial stromal interaction 1 (breast)	94240	BRESI1|MGC29634
LOC647080	chr13	+	44889549	44889903	0.45	0.03	44889449	44889799	0.76	0.03	44889449	44889799	1.55	0		hypothetical protein LOC647080	647080	-
SLC25A30	chr13	-	44889549	44889903	0.45	0.03	44889449	44889799	0.76	0.03	44889449	44889799	1.55	0		solute carrier family 25, member 30	253512	KMCP1
EBPL	chr13	-	49166540	49166891	0.45	0.03	49166640	49166995	1.28	0	49166640	49166995	1.13	0.01		emopamil binding protein-like	84650	EBRP
EBPL	chr13	-	49166540	49166891	0.45	0.03	49166640	49166995	1.28	0	49166640	49166995	1.13	0.01		emopamil binding protein-like	84650	EBRP
KLF12	chr13	-	73607833	73608482	0.47	0.02	73607833	73608182	0.83	0.01	73607933	73608283	1.03	0.03		Kruppel-like factor 12	11278	AP-2rep|AP2REP|HSPC122
TBC1D4	chr13	-	74954701	74955057	1.05	0	74954701	74955057	1.59	0	74954701	74955057	1.92	0		TBC1 domain family, member 4	9882	AS160|DKFZp779C0666
GPR18	chr13	-	98708684	98709433	0.51	0.00632	98708484	98709433	1.28	0	98708484	98709433	2.2	0		G protein-coupled receptor 18	2841	-
ANG	chr14	+	20219411	20219760	0.96	0	20219311	20219760	1.02	0.000439	20219311	20219660	1.29	0.00197		angiogenin, ribonuclease, RNase A family, 5	283	MGC71966|RNASE4|RNASE5
RNASE4	chr14	+	20219411	20219760	0.96	0	20219311	20219760	1.02	0.000439	20219311	20219660	1.29	0.00197		ribonuclease, RNase A family, 4	6038	MGC9306|RNS4
TRA@	chr14	+	21660215	21660564	1.62	0	21660115	21660680	1.41	0	21660315	21660680	2.73	0		T cell receptor alpha locus	6955	FLJ22602|MGC117436|MGC22624|MGC23964|MGC71411|TCRA|TCRD|TRA|TRDD3
DHRS4	chr14	+	23505687	23505937	1.15	0.02	23505687	23505937	1.41	0	23505687	23505937	1.66	0.02		dehydrogenase/reductase (SDR family) member 4	10901	DHRS4L2|FLJ11008|SCAD-SRL|SDR-SRL|humNRDR
ISGF3G	chr14	+	23700188	23700537	0.86	0	23700188	23700537	1.21	0	23700188	23700537	1.53	0	*	interferon-stimulated transcription factor 3, gamma 48kDa	10379	IRF-9|IRF9|ISGF3|p48
PSMA3	chr14	+	57781345	57781794	0.51	0.01	57781445	57781894	1.95	0	57781545	57781894	2.08	0	*	proteasome (prosome, macropain) subunit, alpha type, 3	5684	HC8|MGC12306|MGC32631|PSC3
FLJ33387	chr14	-	67024747	67025096	1.68	0	67024847	67025196	1.88	0	67024647	67025096	2.22	0		hypothetical protein FLJ33387	161145	-
FLJ33387	chr14	-	67051305	67051654	0.68	0.000918	67051305	67051654	1.09	0.000543	67051205	67051454	1.9	0		hypothetical protein FLJ33387	161145	-
RAD51L1	chr14	+	67353205	67353566	1.19	0	67353205	67353566	2.58	0	67353205	67353566	2.82	0		RAD51-like 1 (S. cerevisiae)	5890	MGC34245|R51H2|RAD51B|REC2|hREC2
ZFYVE26	chr14	-	67353205	67353566	1.19	0	67353205	67353566	2.58	0	67353205	67353566	2.82	0		zinc finger, FYVE domain containing 26	23503	DKFZp686F19106|DKFZp781H1112|KIAA0321
ZFYVE26	chr14	-	67353205	67353566	1.19	0	67353205	67353566	2.58	0	67353205	67353566	2.82	0		zinc finger, FYVE domain containing 26	23503	DKFZp686F19106|DKFZp781H1112|KIAA0321
C14orf159	chr14	+	90650601	90650950	1.33	0	90650601	90650950	2.07	0	90650601	90650950	2.59	0		chromosome 14 open reading frame 159	80017	C14orf160|FLJ20950|FLJ39975
FAM98B	chr15	+	36533546	36533995	0.88	0	36533346	36533795	0.8	0.03	36533146	36533595	1.12	0.01		family with sequence similarity 98, member B	283742	FLJ38426
FAM98B	chr15	+	36533546	36533995	0.88	0	36533346	36533795	0.8	0.03	36533146	36533595	1.12	0.01		family with sequence similarity 98, member B	283742	FLJ38426
GANC	chr15	+	40353457	40353813	0.88	0	40353557	40353909	2.16	0	40353557	40353909	2	0		glucosidase, alpha%3B neutral C	2595	MGC138256
TMEM87A	chr15	-	40353457	40353813	0.88	0	40353557	40353909	2.16	0	40353557	40353909	2	0		transmembrane protein 87A	25963	DKFZP564G2022
TMEM87A	chr15	-	40353457	40353813	0.88	0	40353557	40353909	2.16	0	40353557	40353909	2	0		transmembrane protein 87A	25963	DKFZP564G2022
TMEM62	chr15	+	41212813	41213069	1.75	0	41212813	41213069	1.92	0	41212813	41213069	2.66	0		transmembrane protein 62	80021	FLJ23375
FLJ10038	chr15	-	48434400	48434849	0.76	0	48434400	48434749	0.92	0.00543	48434300	48434949	1.17	0.00983		hypothetical protein FLJ10038	55056	-
GABPB2	chr15	-	48434400	48434849	0.76	0	48434400	48434749	0.92	0.00543	48434300	48434949	1.17	0.00983		GA binding protein transcription factor, beta subunit 2	2553	BABPB2|E4TF1|E4TF1-47|E4TF1-53|E4TF1B|GABPB|GABPB1|NRF2B1|NRF2B2
VPS13C	chr15	-	60139289	60139838	0.78	0	60139189	60139538	0.96	0.00392	60139189	60139538	1.72	0		vacuolar protein sorting 13 homolog C (S. cerevisiae)	54832	DKFZp686E0570|FLJ21361
HERC1	chr15	-	61913190	61913639	0.56	0.00742	61913190	61913639	1	0.00187	61913190	61913539	1.49	0		hect (homologous to the E6-AP (UBE3A) carboxyl terminus) domain and RCC1 (CHC1)-like domain (RLD) 1	8925	p532|p619
SPG21	chr15	-	63069559	63069708	1.23	0	63069559	63069708	1.76	0	63069559	63069708	1.82	0.00752		spastic paraplegia 21 (autosomal recessive, Mast syndrome)	51324	ACP33|BM-019|GL010|MAST
CIITA	chr16	+	10878239	10878588	0.59	0.00523	10878239	10878588	1.61	0	10878239	10878588	1.82	0	*	class II, major histocompatibility complex, transactivator	4261	C2TA|CIITA IV|MHC2TA
ADCY7	chr16	+	48865373	48865822	1.28	0	48865373	48865822	2.1	0	48865473	48865822	2.32	0		adenylate cyclase 7	113	FLJ36387|KIAA0037
HERPUD1	chr16	+	55522957	55523306	1.78	0	55522957	55523306	1.29	0	55522957	55523306	2.05	0		homocysteine-inducible, endoplasmic reticulum stress-inducible, ubiquitin-like domain member 1	9709	HERP|KIAA0025|Mif1|SUP
HERPUD1	chr16	+	55522957	55523306	1.78	0	55522957	55523306	1.29	0	55522957	55523306	2.05	0		homocysteine-inducible, endoplasmic reticulum stress-inducible, ubiquitin-like domain member 1	9709	HERP|KIAA0025|Mif1|SUP
CA7	chr16	+	65432482	65432731	0.89	0	65432482	65432831	1.33	0	65432482	65433134	1.27	0.01		carbonic anhydrase VII	766	CAVII
CTRL	chr16	-	66527969	66528418	1.05	0	66527969	66528418	1.37	0	66527969	66528518	2.14	0	*	chymotrypsin-like	1506	CTRL1|MGC70821
PSMB10	chr16	-	66527969	66528418	1.05	0	66527969	66528418	1.37	0	66527969	66528518	2.14	0	*	proteasome (prosome, macropain) subunit, beta type, 10	5699	LMP10|MECL1|MGC1665
KARS	chr16	-	74238684	74239133	0.55	0.00946	74238484	74238933	0.89	0.01	74238584	74238933	1.41	0		lysyl-tRNA synthetase	3735	KARS2|KIAA0070
TERF2IP	chr16	+	74238684	74239133	0.55	0.00946	74238484	74238933	0.89	0.01	74238584	74238933	1.41	0		telomeric repeat binding factor 2, interacting protein	54386	DRIP5|RAP1
TERF2IP	chr16	+	74238684	74239133	0.55	0.00946	74238484	74238933	0.89	0.01	74238584	74238933	1.41	0		telomeric repeat binding factor 2, interacting protein	54386	DRIP5|RAP1
KIAA1787	chr17	-	7173494	7173943	0.82	0	7173594	7174049	0.84	0.02	7173694	7174049	1.85	0		KIAA1787 protein	84461	-
LOC390760	chr17	+	7173494	7173943	0.82	0	7173594	7174049	0.84	0.02	7173694	7174049	1.85	0		similar to protein phosphatase 1, regulatory (inhibitor) subunit 2	390760	-
PER1	chr17	-	8002838	8003087	0.72	0.00329	8002738	8003087	1.16	0.000572	8002838	8003087	1.25	0.01	*	period homolog 1 (Drosophila)	5187	MGC88021|PER|RIGUI|hPER
NEK8	chr17	+	24079625	24080174	0.6	0.00159	24079725	24080174	1.29	0	24079825	24080174	1.39	0.000951		NIMA (never in mitosis gene a)- related kinase 8	284086	JCK|MGC138445|NEK12A
TLCD1	chr17	-	24079625	24080174	0.6	0.00159	24079725	24080174	1.29	0	24079825	24080174	1.39	0.000951		TLC domain containing 1	116238	-
LGP2	chr17	-	37518064	37518413	0.7	0.00105	37517764	37518413	0.96	0	37517764	37518413	1.34	0	*	likely ortholog of mouse D11lgp2	79132	D11lgp2e
IFI35	chr17	+	38412173	38412522	0.82	0	38412173	38412522	1.73	0	38412173	38412522	1.9	0	*	interferon-induced protein 35	3430	FLJ21753|IFP35
DBF4B	chr17	+	40141401	40141750	0.45	0.03	40141901	40142150	0.96	0.01	40141901	40142150	1.11	0.04		DBF4 homolog B (S. cerevisiae)	80174	ASKL1|DRF1|FLJ13087|MGC15009
MYL4	chr17	+	42637926	42638175	1.11	0	42637926	42638175	1.61	0	42637926	42638175	2.27	0		myosin, light polypeptide 4, alkali%3B atrial, embryonic	4635	ALC1|AMLC|GT1|PRO1957
SPAG9	chr17	-	46483104	46483269	1.44	0	46483104	46483269	2.05	0	46483104	46483269	2.4	0		sperm associated antigen 9	9043	FLJ13450|FLJ14006|FLJ34602|HLC4|HSS|JLP|KIAA0516|MGC117291|MGC14967|MGC74461|PHET|PIG6
GNA13	chr17	-	60483574	60483823	0.78	0	60483474	60483823	0.8	0.03	60483474	60483823	1.25	0.00376	*	guanine nucleotide binding protein (G protein), alpha 13	10672	G13|MGC46138
ET	chr17	+	72242571	72243027	0.56	0.00742	72242771	72243228	1.45	0	72242771	72243228	1.8	0		hypothetical protein ET	79157	-
SECTM1	chr17	-	77886054	77886503	0.47	0.02	77886154	77886503	1.41	0	77886154	77886503	1.85	0	*	secreted and transmembrane 1	6398	K12
FLJ22222	chr17	-	77970766	77971122	0.68	0.000918	77970766	77971215	1.21	0	77970566	77970915	1.9	0		hypothetical protein FLJ22222	79701	-
HEXDC	chr17	+	77970766	77971122	0.68	0.000918	77970766	77971215	1.21	0	77970566	77970915	1.9	0		hexosaminidase (glycosyl hydrolase family 20, catalytic domain) containing	284004	FLJ23825
CHMP1B	chr18	+	11841246	11841595	0.53	0.01	11841246	11841595	0.96	0.00392	11841046	11841395	0.99	0.04		chromatin modifying protein 1B	57132	C10orf2|C18-ORF2|CHMP1.5
LOC113179	chr19	+	1855386	1855735	0.46	0.03	1855386	1855735	1.09	0.000439	1855386	1855735	1.17	0.00983		hypothetical protein BC011824	113179	FWP005|MST121|MSTP121|S863-5
SCAMP4	chr19	+	1855386	1855735	0.46	0.03	1855386	1855735	1.09	0.000439	1855386	1855735	1.17	0.00983		secretory carrier membrane protein 4	113178	FLJ33847|FLJ90105|SCAMP-4
FLJ11286	chr19	+	10057918	10058567	0.38	0.01	10057818	10058267	0.84	0.03	10057618	10058267	1.07	0.01	*	hypothetical protein FLJ11286	55337	-
LOC646097	chr19	-	10057918	10058567	0.38	0.01	10057818	10058267	0.84	0.03	10057618	10058267	1.07	0.01		hypothetical protein LOC646097	646097	-
CARM1	chr19	+	10839752	10840104	0.5	0.02	10839752	10840104	1.34	0	10839752	10840104	1.82	0		coactivator-associated arginine methyltransferase 1	10498	PRMT4
ZNF490	chr19	-	12585555	12585911	1.5	0	12585655	12586004	2.22	0	12585655	12586004	2.48	0		zinc finger protein 490	57474	KIAA1198
FXYD7	chr19	+	40324648	40324997	0.84	0	40324648	40324997	1.63	0	40324648	40324997	1.73	0		FXYD domain containing ion transport regulator 7	53822	FLJ25096
LSR	chr19	+	40431934	40432283	1.04	0	40431934	40432283	1.51	0	40431834	40432283	1.78	0		lipolysis stimulated lipoprotein receptor	51599	LISCH7|MGC10659|MGC48312|MGC48503
CD37	chr19	+	54528839	54529188	0.62	0.00401	54528939	54529188	1.38	0	54528939	54529188	1.82	0		CD37 molecule	951	GP52-40|MGC120234|TSPAN26
FLT3LG	chr19	+	54668997	54669546	0.64	0.00181	54669097	54669546	1.09	0.000439	54669097	54669546	1.63	0		fms-related tyrosine kinase 3 ligand	2323	-
SPIB	chr19	+	55610826	55611175	1.02	0	55610826	55611175	1.51	0	55610826	55611175	1.96	0		Spi-B transcription factor (Spi-1/PU.1 related)	6689	SPI-B
SPTBN1	chr2	+	54638234	54638683	1.06	0.01	54638134	54638483	2.9	0	54638134	54638483	1.29	0		spectrin, beta, non-erythrocytic 1	6711	SPTB2
AFF3	chr2	-	100125419	100125769	1.35	0.00219	100125319	100125769	3.12	0	100125419	100125769	2.12	0		AF4/FMR2 family, member 3	3899	LAF4|MLLT2-like
ANAPC1	chr2	-	112358267	112358616	1.03	0.01	112358267	112358716	2.56	0	112358367	112358716	1.69	0		anaphase promoting complex subunit 1	64682	APC1|MCPR|TSG24
IFIH1	chr2	-	162883381	162883737	1.32	0.00351	162883381	162884033	1.82	0	162883381	162883830	1.22	0	*	interferon induced with helicase C domain 1	64135	Hlcd|MDA-5|MDA5|MGC133047
PNKD	chr2	+	218893734	218894096	1.54	0	218893734	218894096	3.03	0	218893734	218894096	2.05	0		paroxysmal nonkinesiogenic dyskinesia	25953	BRP17|DKFZp564N1362|DYT8|FKSG19|FPD1|KIAA1184|KIPP1184|MGC31943|MR-1|MR1|PDC|TAHCCP2
DNPEP	chr2	-	219960408	219960757	1.35	0.00219	219960408	219960757	2.77	0	219960408	219960757	1.73	0		aspartyl aminopeptidase	23549	ASPEP|DAP
SP100	chr2	+	230988876	230989225	1.22	0.00607	230988876	230989325	2.82	0	230988876	230989325	1.73	0	*	SP100 nuclear antigen	6672	DKFZp686E07254|FLJ00340
C20orf18	chr20	+	336864	337214	0.69	0.000918	336864	337214	1.37	0	336864	337214	1.54	0	*	chromosome 20 open reading frame 18	10616	RBCK1|RNF54|UBCE7IP3|XAP4
SLC23A2	chr20	-	4901866	4902222	1.69	0	4901766	4902222	2.42	0	4901866	4902222	2.93	0	*	solute carrier family 23 (nucleobase transporters), member 2	9962	KIAA0238|NBTL1|SLC23A1|SVCT2|YSPL2
PCNA	chr20	-	5048539	5049396	0.37	0.01	5048739	5049096	1.37	0	5048539	5049096	1.4	0	*	proliferating cell nuclear antigen	5111	MGC8367
C20orf38	chr20	+	12938147	12938605	1.77	0	12938147	12938605	2.1	0	12938247	12938605	2.52	0		chromosome 20 open reading frame 38	55304	FLJ11112
CTSZ	chr20	-	57016151	57016500	0.57	0.00742	57016251	57016600	0.97	0.00392	57016151	57016500	1.26	0.00376		cathepsin Z	1522	CTSX
C21orf91	chr21	-	18113883	18114840	0.48	0.02	18114183	18114536	1.65	0	18114083	18114446	2.55	0		chromosome 21 open reading frame 91	54149	C21orf14|C21orf38|DKFZp781D1223|YG81
RUNX1	chr21	-	35344826	35345176	0.54	0.00946	35344726	35345088	1.57	0	35344526	35345088	2.27	0	*	runt-related transcription factor 1 (acute myeloid leukemia 1%3B aml1 oncogene)	861	AML1|AML1-EVI-1|AMLCR1|CBFA2|EVI-1|PEBP2A2|PEBP2aB
MX2	chr21	+	41655319	41655968	0.31	0.04	41655419	41655868	1.22	0	41655619	41655968	1.3	0.00197	*	myxovirus (influenza virus) resistance 2 (mouse)	4600	MXB
C21orf25	chr21	-	42219597	42219946	0.87	0	42219697	42220055	1.57	0	42219697	42220055	2.64	0		chromosome 21 open reading frame 25	25966	C21orf258|DKFZP586F0422|DKFZp686O198|MGC71445|TMEM24L
UMODL1	chr21	+	42354536	42354885	1.18	0	42354536	42354885	2.28	0	42354536	42354885	2.22	0		uromodulin-like 1	89766	-
UMODL1	chr21	+	42356536	42356785	1.43	0	42356436	42356785	1.29	0	42356236	42356685	1.9	0		uromodulin-like 1	89766	-
TBX1	chr22	+	18124625	18124874	0.67	0.00789	18124625	18124874	0.92	0.02	18124525	18124874	1.2	0.0054		T-box 1	6899	CAFS|CTHM|DGCR|DGS|DORV|TBX1C|TGA|VCFS
APOL6	chr22	+	34374269	34374618	0.9	0	34374169	34374518	1.52	0	34374169	34374518	2.3	0		apolipoprotein L, 6	80830	APOL-VI|DKFZp667M075|FLJ90164|MGC57495
APOL3	chr22	-	34886578	34886927	0.53	0.01	34886678	34887127	1.56	0	34886678	34887027	1.89	0	*	apolipoprotein L, 3	80833	APOLIII|CG12-1
APOL2	chr22	-	34965353	34965702	0.86	0	34965153	34965802	1.64	0	34965453	34965802	2.21	0	*	apolipoprotein L, 2	23780	APOL-II
APOL1	chr22	+	34978877	34979226	0.74	0.00087	34978877	34979226	1.85	0	34978877	34979226	2.21	0	*	apolipoprotein L, 1	8542	APO-L|APOL|APOL-I
NCF4	chr22	+	35586675	35587024	1.13	0	35586775	35587124	1.08	0.000501	35586775	35587124	1.01	0.03		neutrophil cytosolic factor 4, 40kDa	4689	MGC3810|NCF|P40PHOX|SH3PXD4
APOBEC3B	chr22	+	37708266	37708515	0.67	0.00789	37708266	37708615	1.48	0	37708266	37708515	2.21	0	*	apolipoprotein B mRNA editing enzyme, catalytic polypeptide-like 3B	9582	APOBEC1L|ARCD3|ARP4|DJ742C19.2|FLJ21201|PHRBNL
FLJ10945	chr22	-	44832712	44832971	0.92	0	44832712	44832971	1.68	0	44832712	44832971	2.53	0		hypothetical protein FLJ10945	55267	-
LOC554174	chr22	-	44832712	44832971	0.92	0	44832712	44832971	1.68	0	44832712	44832971	2.53	0		hypothetical LOC554174	554174	-
AZI2	chr3	-	28365063	28365617	0.75	0.04	28364763	28365217	1.59	0.000335	28365063	28365617	0.76	0.01	*	5-azacytidine induced 2	64343	AZ2|NAP1|TILP(S)|tilp
ZCWPW2	chr3	+	28365063	28365617	0.75	0.04	28364763	28365217	1.59	0.000335	28365063	28365617	0.76	0.01		zinc finger, CW type with PWWP domain 2	152098	ZCW2
ARPP-21	chr3	+	35658313	35659065	0.94	0.00526	35658413	35658862	1.94	0	35658413	35658762	1.23	0		cyclic AMP-regulated phosphoprotein, 21 kD	10777	-
GORASP1	chr3	-	39124994	39125345	1.59	0	39124794	39125345	3.04	0	39124994	39125345	2.39	0		golgi reassembly stacking protein 1, 65kDa	64689	FLJ23443|GOLPH5|GRASP65|MGC118894|MGC118897|P65
TTC21A	chr3	+	39124994	39125345	1.59	0	39124794	39125345	3.04	0	39124994	39125345	2.39	0		tetratricopeptide repeat domain 21A	199223	DKFZp686P18239|MGC70523|STI2
TREX1	chr3	+	48482448	48482797	1.09	0.0077	48482448	48482897	2.47	0	48482448	48482797	1.19	0	*	three prime repair exonuclease 1	11277	ATRIP|DKFZp434J0310|DRN3|FLJ12343
NFKBIZ	chr3	+	103029248	103029710	1	0.01	103029248	103029710	2.29	0	103028747	103029710	1.27	0		nuclear factor of kappa light polypeptide gene enhancer in B-cells inhibitor, zeta	64332	FLJ30225|FLJ34463|IKBZ|INAP|MAIL
RTP4	chr3	+	188568674	188569023	1.12	0.00694	188568674	188569023	2.73	0	188568674	188569023	1.66	0	*	receptor transporter protein 4	64108	IFRG28
TBC1D1	chr4	+	37569402	37569751	0.98	0.04	37569502	37569751	1.39	0.00979	37569502	37569751	2.02	0		TBC1 (tre-2/USP6, BUB2, cdc16) domain family, member 1	23216	KIAA1108|TBC|TBC1
ADH6	chr4	-	100359765	100360023	1.7	0	100359765	100360023	2.61	0	100359765	100360023	1.14	0		alcohol dehydrogenase 6 (class V)	130	ADH-5
BANK1	chr4	+	102930618	102930967	1.92	0	102930618	102931067	2.86	0	102930618	102931067	1.74	0		B-cell scaffold protein with ankyrin repeats 1	55024	BANK|FLJ20706|FLJ34204
FLJ31033	chr4	-	169638343	169639103	1.08	0.01	169638143	169639303	1.64	0	169638143	169638996	1.67	0		hypothetical protein FLJ31033	91351	DKFZp781D1175|FLJ13468|FLJ39050
SCAMP1	chr5	+	77691709	77692058	1.83	0	77691609	77691958	2.44	0	77691709	77692058	1.4	0		secretory carrier membrane protein 1	9522	SCAMP|SCAMP37
ARTS-1	chr5	-	96169286	96169635	0.92	0.03	96169286	96169635	1.77	0	96169286	96169635	1.04	0		type 1 tumor necrosis factor receptor shedding aminopeptidase regulator	51752	A-LAP|ALAP|APPILS|ARTS1|ERAAP|ERAP1|KIAA0525|PILSAP
LOC642716	chr5	-	96237815	96238164	1.41	0	96237715	96238272	3.24	0	96237715	96238272	2.12	0		hypothetical protein LOC642716	642716	-
LRAP	chr5	+	96237815	96238164	1.41	0	96237715	96238272	3.24	0	96237715	96238272	2.12	0		leukocyte-derived arginine aminopeptidase	64167	ERAP2|FLJ23633|FLJ23701|L-RAP
LNPEP	chr5	+	96296469	96296818	1.14	0.0077	96295869	96296618	1.31	0.00186	96296069	96296918	0.76	0.01		leucyl/cystinyl aminopeptidase	4012	CAP|IRAP|P-LAP|PLAP
CD74	chr5	-	149772456	149772813	1.14	0.0077	149772356	149772813	1.85	0	149772456	149772813	1.55	0	*	CD74 molecule, major histocompatibility complex, class II invariant chain	972	DHLAG|HLADG|Ia-GAMMA|protein 41
LOC401233	chr6	-	2972279	2972528	1.4	0.00439	2972179	2972528	2.72	0	2972179	2972528	1.49	0		similar to HIV TAT specific factor 1%3B cofactor required for Tat activation of HIV-1 transcription	401233	-
LY86	chr6	+	6533832	6534281	1.13	0.01	6533732	6534081	2.28	0	6533732	6534081	1.67	0		lymphocyte antigen 86	9450	MD-1|dJ80N2.1
RREB1	chr6	+	7081976	7082325	1.1	0.01	7082076	7082425	2.14	0	7081976	7082325	1.49	0	*	ras responsive element binding protein 1	6239	FINB|LZ321|RREB-1|Zep-1
TRIM38	chr6	+	26070881	26071231	1.4	0.00219	26070781	26071231	2.99	0	26070881	26071231	2.15	0	*	tripartite motif-containing 38	10475	MGC8946|RNF15|RORET
HLA-C	chr6	-	31347884	31348233	1.47	0	31347884	31348233	3.08	0	31347884	31348233	1.46	0	*	major histocompatibility complex, class I, C	3107	Cw*1701|D6S204|FLJ27082|HLA-JY3|HLC-C
HLA-B	chr6	-	31433064	31433515	1	0.02	31432964	31433313	2.54	0	31432964	31433313	0.91	0.00178		major histocompatibility complex, class I, B	3106	B antigen|B*15|B*1801|B*35|B*4601|Cw*01|Cw*03|Cw*08|HLA B|HLA C*
HLA-DRA	chr6	+	32513124	32513484	1.1	0.01	32513124	32513484	2.9	0	32513124	32513484	2.18	0	*	major histocompatibility complex, class II, DR alpha	3122	HLA-DRA1
TAP2	chr6	-	32914344	32914693	1.67	0	32914344	32914693	2.28	0	32914344	32914693	0.91	0.00178	*	transporter 2, ATP-binding cassette, sub-family B (MDR/TAP)	6891	ABC18|ABCB3|APT2|D6S217E|PSF2|RING11
PSMB8	chr6	-	32919644	32919993	1.9	0	32919544	32920093	2.86	0	32919444	32919993	1.78	0	*	proteasome (prosome, macropain) subunit, beta type, 8 (large multifunctional peptidase 7)	5696	D6S216|D6S216E|LMP7|MGC1491|RING10
PSMB9	chr6	+	32929915	32930364	1.17	0.0077	32930115	32930564	2.23	0	32930215	32930564	1.78	0		proteasome (prosome, macropain) subunit, beta type, 9 (large multifunctional peptidase 2)	5698	LMP2|MGC70470|RING12
TAP1	chr6	-	32929915	32930364	1.17	0.0077	32930115	32930564	2.23	0	32930215	32930564	1.78	0	*	transporter 1, ATP-binding cassette, sub-family B (MDR/TAP)	6890	ABC17|ABCB2|APT1|D6S114E|FLJ26666|PSF1|RING4|TAP1*0102N|TAP1N
TAPBP	chr6	-	33389517	33389966	1	0.02	33389217	33390172	2.41	0	33389517	33389966	1.82	0		TAP binding protein (tapasin)	6892	NGS17|TAPA|TPN|TPSN
TRIAD3	chr7	-	5699585	5699934	0.99	0.01	5699585	5700034	1.37	0.000993	5699585	5699934	0.98	0.000264		TRIAD3 protein	54476	U7I1|UBCE7IP1|ZIN
INHBA	chr7	-	41711150	41711499	0.96	0.01	41711150	41711602	2.27	0	41710950	41711602	0.73	0.01		inhibin, beta A (activin A, activin AB alpha polypeptide)	3624	EDF|FRP
SUNC1	chr7	-	48017735	48018084	0.93	0.01	48017535	48018084	1.93	0	48017535	48018084	1.06	0		Sad1 and UNC84 domain containing 1	256979	MGC33329
SAMD9	chr7	-	92585208	92585565	1.14	0.00607	92585208	92585960	2.06	0	92585108	92585960	1.31	0	*	sterile alpha motif domain containing 9	54809	C7orf5|FLJ20073|KIAA2004|OEF1|OEF2
PUS7	chr7	-	104952647	104952896	1.34	0	104952647	104952896	2.36	0	104952647	104952896	1.17	0		pseudouridylate synthase 7 homolog (S. cerevisiae)	54517	FLJ20485|KIAA1897|MGC17720
ZC3HAV1	chr7	-	138444584	138445036	0.96	0.01	138444784	138445735	1.97	0	138444584	138445036	0.77	0.02	*	zinc finger CCCH-type, antiviral 1	56829	DKFZp686F2052|DKFZp686H1869|DKFZp686O19171|FLB6421|FLJ13288|MGC48898|ZAP|ZC3H2|ZC3HDC2
PDLIM2	chr8	+	22493787	22494136	1.04	0.01	22493587	22494236	2.14	0	22493687	22494036	1.08	0		PDZ and LIM domain 2 (mystique)	64236	FLJ34715
CHRNA6	chr8	-	42742326	42742779	0.94	0.03	42742526	42742875	2.23	0	42742526	42742875	1.91	0		cholinergic receptor, nicotinic, alpha 6	8973	CHNRA6
C8orf70	chr8	+	79740184	79740533	1.88	0	79740184	79740533	2.78	0	79740084	79740433	2.34	0		chromosome 8 open reading frame 70	51101	CGI-62
NBN	chr8	-	91065325	91066174	1.01	0.02	91065325	91065774	2.06	0	91065325	91065774	1.77	0		nibrin	4683	AT-V1|AT-V2|ATV|FLJ10155|MGC87362|NBS|NBS1
PGCP	chr8	+	97727074	97727323	1.71	0	97727074	97727323	2.94	0	97726974	97727323	1.84	0		plasma glutamate carboxypeptidase	10404	-
DDX58	chr9	-	32516272	32516621	1.41	0	32516272	32516621	2.62	0	32516172	32516532	1.82	0	*	DEAD (Asp-Glu-Ala-Asp) box polypeptide 58	23586	DKFZp686N19181|FLJ13599|RIG-I
TLR4	chr9	+	119506204	119506553	1.38	0	119506204	119506553	2.96	0	119506204	119506553	1.97	0	*	toll-like receptor 4	7099	CD284|TOLL|hToll
ZNF41	chrX	-	47229394	47229943	0.71	0.00105	47229394	47229943	1.52	0	47229394	47229843	1.19	0.00983		zinc finger protein 41	7592	MGC8941|MRX89
ABCB7	chrX	-	74292882	74293431	0.43	0.04	74292382	74292931	0.7	0.04	74292582	74293139	1.71	0		ATP-binding cassette, sub-family B (MDR/TAP), member 7	22	ABC7|ASAT|Atm1p|EST140535
BCAP31	chrX	-	152645516	152645865	1.22	0	152645516	152645865	1.33	0	152645516	152645865	1.94	0		B-cell receptor-associated protein 31	10134	6C6-AG|BAP31|CDM|DXS1357E
Maximum distance between one peak from another in three different cell lines is below 500bp.
Minimun distance of peaks in three different cell lines to peak in MMS1 (negative control) is over 500bp if there is any peak detected in MMS1.
FDR, false discovery rate, is below 0.05.
Score is ChIP/input enrichment fold in log2
