# Supplementary material for: IRF8 Governs Expression of Genes Involved in Innate and Adaptive Immunity in Human and Mouse Germinal Center B Cells
Source: PLoS One. 2011 Nov 11;6(11):e27384. doi: 10.1371/journal.pone.0027384 (PMC3214047; doi:10.1371/journal.pone.0027384)
Supplement: Table S3 — List of direct IRF8 targets in mouse GC B cell lines. FDR(false discovery rate) is <0.01. Score is the fold enrichment of ChIP to input in log2. (XLSX) [file pone.0027384.s004.xlsx]

## Sheet: nrmouseIrf8targets_threewithin5
TableS3. List of direct IRF8 targets in mouse GC B cell lines.
			NFS201				NFS202				NFS205
Name	CHROMOSOME	STRAND	START	END	Score	FDR	Start	End	Score	FDR	Start	End	Score	FDR	Description	Entez	Synonyms
Tcea1	chr1	+	4847174	4847823	0.88	0.00667	4847174	4847823	0.82	0.00533	4847174	4847823	1.72	0.000563	transcription elongation factor A (SII) 1	21399	MGC103154|S-II
Mybl1	chr1	-	9687718	9688174	1.59	0	9687818	9688272	1.53	0	9687818	9688272	1.46	0.00307	myeloblastosis oncogene-like 1	17864	A-myb|MGC123416
Slco5a1	chr1	-	12976699	12977448	1.56	0	12976699	12977448	1.5	0	12976699	12977448	2.02	0	solute carrier organic anion transporter family, member 5A1	240726	4732454B15|A630033C23Rik|AA407151
Kcnq5	chr1	-	21948582	21949436	1.33	0	21948382	21949436	0.68	0.00416	21948982	21949436	1.72	0.000563	potassium voltage-gated channel, subfamily Q, member 5	226922	7730402H11|9230107O05Rik|AA589396|D1Mgi1
B230209C24Rik	chr1	-	33827838	33828187	1.46	0	33827838	33828187	1.17	0.00022	33827638	33828187	1.37	0.00672	RIKEN cDNA B230209C24 gene	320705	-
Ptpn18	chr1	+	34417131	34417680	1.17	0	34417331	34417780	0.82	0.00533	34417131	34417680	1.8	0	protein tyrosine phosphatase, non-receptor type 18	19253	FLP1|HSCF|PTP-HSCF|PTP-K1|Ptpk1
Arid5a	chr1	+	36251654	36252003	1.33	0	36251754	36252203	1.01	0.000595	36251654	36252103	1.67	0.00127	AT rich interactive domain 5A (Mrf1 like)	214855	D430024K22Rik|MGC36895|Mrf1
1500032H18Rik	chr1	-	37834548	37834897	1.62	0	37834548	37834897	1.53	0	37834448	37834797	2.1	0	RIKEN cDNA 1500032H18 gene	69028	-
Mrpl30	chr1	+	37834548	37834897	1.62	0	37834548	37834897	1.53	0	37834448	37834797	2.1	0	mitochondrial ribosomal protein L30	107734	2310001L22Rik|MRP-L28|Rpml28
Slc39a10	chr1	-	46798005	46799056	1.04	0	46798005	46798856	1.12	0	46798405	46799361	1.67	0	solute carrier family 39 (zinc transporter), member 10	227059	2900042E17Rik|5430433I10|mKIAA1265
Stat1	chr1	+	52063751	52064300	1.49	0	52063751	52064100	0.95	0.0014	52063651	52064100	1.67	0.00127	signal transducer and activator of transcription 1	20846	2010005J02Rik|AA408197
Ppil3	chr1	-	58389903	58390352	1.17	0.000372	58389803	58390252	1.12	0.000189	58389803	58390152	1.46	0.00307	peptidylprolyl isomerase (cyclophilin)-like 3	70225	2310076N22Rik|2510026K04Rik|Cyp10l
Nif3l1	chr1	+	58389903	58390352	1.17	0.000372	58389803	58390252	1.12	0.000189	58389803	58390152	1.46	0.00307	Ngg1 interacting factor 3-like 1 (S. pombe)	65102	1110030G24Rik|MGC107114
Cflar	chr1	+	58655989	58656338	1.2	0.000301	58655789	58656338	1.15	0	58655889	58656338	1.59	0.00183	CASP8 and FADD-like apoptosis regulator	12633	CLARP|Cash|Casper|FLAME|Flip|I-FLICE|MGC103395|MRIT|c-Flip
Als2	chr1	-	59182088	59182437	2.08	0	59181988	59182337	1.5	0	59181888	59182337	1.37	0.00672	amyotrophic lateral sclerosis 2 (juvenile) homolog (human)	74018	3222402C23Rik|9430073A21Rik|Als2cr6|Alsin|MGC27807|mKIAA1563
Wdr12	chr1	-	60042512	60042961	1.17	0.000372	60042512	60042861	1.28	0	60042212	60042661	1.37	0.00672	WD repeat domain 12	57750	4933402C23Rik|Ytm1|Ytm1p
Carf	chr1	+	60042512	60042961	1.17	0.000372	60042512	60042861	1.28	0	60042212	60042661	1.37	0.00672	calcium response factor	241066	Als2cr8
Ndufs1	chr1	-	63111056	63111405	1.07	0.00157	63111056	63111405	1.2	0.000231	63111056	63111405	1.37	0.00672	NADH dehydrogenase (ubiquinone) Fe-S protein 1	227197	5830412M15Rik|9930026A05Rik|MGC19199|MGC7850
Eef1b2	chr1	+	63111056	63111405	1.07	0.00157	63111056	63111405	1.2	0.000231	63111056	63111405	1.37	0.00672	eukaryotic translation elongation factor 1 beta 2	55949	2810017J07Rik|Eef1b
9430067K14Rik	chr1	-	64862823	64863072	2.59	0	64862823	64863072	1.72	0	64862823	64863072	2.15	0	RIKEN cDNA 9430067K14 gene	241075	A230102O09Rik|AI449570
Pip5k3	chr1	+	65208727	65209080	1.85	0	65208727	65209080	1.23	0.000241	65208727	65209080	1.46	0.00307	phosphatidylinositol-3-phosphate/phosphatidylinositol 5-kinase, type III	18711	5230400C17Rik|Pikfyve|Pip5k|Pipk5k3|p235
Bard1	chr1	-	71036476	71036731	1.65	0.00427	71036476	71036731	1.47	0.00211	71036476	71036731	1.72	0.00632	BRCA1 associated RING domain 1	12021	-
Xrcc5	chr1	+	72240672	72241121	2.59	0	72240672	72241021	1.69	0	72240772	72241121	1.72	0.000563	X-ray repair complementing defective repair in Chinese hamster cells 5	22596	AI314015|Ku80|Ku86
Ap1s3	chr1	-	79550237	79550586	2.3	0	79550237	79550586	1.47	0.00211	79550237	79550586	2.06	0	adaptor-related protein complex AP-1, sigma 3	252903	1190009B22|Jr2|[s]3A
Trip12	chr1	-	84717330	84717879	1.07	0.00157	84717530	84717979	1.01	0.000595	84717330	84717879	1.33	0.00877	thyroid hormone receptor interactor 12	14897	1110036I07Rik|6720416K24Rik|AA410158|Gtl6|MGC31615
Fbxo36	chr1	+	84717330	84717879	1.07	0.00157	84717530	84717979	1.01	0.000595	84717330	84717879	1.33	0.00877	F-box only protein 36	66153	0610008D19Rik|1110020F21Rik|2410002G19Rik|D1Ertd757e
Trip12	chr1	-	84718430	84718779	1.59	0	84718230	84718679	0.76	0.0065	84718330	84718979	1.46	0.00307	thyroid hormone receptor interactor 12	14897	1110036I07Rik|6720416K24Rik|AA410158|Gtl6|MGC31615
Fbxo36	chr1	+	84718430	84718779	1.59	0	84718230	84718679	0.76	0.0065	84718330	84718979	1.46	0.00307	F-box only protein 36	66153	0610008D19Rik|1110020F21Rik|2410002G19Rik|D1Ertd757e
A530032D15Rik	chr1	-	84988460	84988809	1.01	0.00269	84988460	84988809	0.93	0.00174	84988260	84988809	1.25	0.00877	RIKEN cDNA A530032D15Rik gene	381287	Gm1888|MGC130185|MGC130186
5830484A20Rik	chr1	+	84988460	84988809	1.01	0.00269	84988460	84988809	0.93	0.00174	84988260	84988809	1.25	0.00877	RIKEN cDNA 5830484A20 gene	109032	Ifi75|Ipr1|Sp110
A530040E14Rik	chr1	+	84988460	84988809	1.01	0.00269	84988460	84988809	0.93	0.00174	84988260	84988809	1.25	0.00877	RIKEN cDNA A530040E14 gene	621875	-
Csprs	chr1	-	87357575	87358226	1.36	0.00526	87357575	87358226	1.42	0.00195	87357575	87357924	1.5	0.00279	component of Sp100-rs	114564	D1Lub1|HSR|MGC29132
LOC665338	chr1	-	87357575	87358226	1.36	0.00526	87357575	87358226	1.42	0.00195	87357575	87357924	1.5	0.00279	similar to component of Sp100-rs	665338	-
LOC631657	chr1	+	87565771	87566524	1.78	0	87565771	87566524	1.36	0	87565771	87566920	1.63	0.00184	hypothetical LOC631657	631657	-
Ankmy1	chr1	-	94736362	94736811	2.01	0	94736362	94736811	1.5	0	94736362	94736811	2.36	0	ankyrin repeat and MYND domain containing 1	241158	4930483I10Rik|ZMYND13
0710001B24Rik	chr1	+	94736362	94736811	2.01	0	94736362	94736811	1.5	0	94736362	94736811	2.36	0	RIKEN cDNA 0710001B24 gene	67446	AV005521
Rnpepl1	chr1	+	94736362	94736811	2.01	0	94736362	94736811	1.5	0	94736362	94736811	2.36	0	arginyl aminopeptidase (aminopeptidase B)-like 1	108657	1110014H17Rik|AI894167
Clasp1	chr1	+	120215653	120216002	2.89	0	120215553	120216002	2.45	0	120215653	120216002	3.01	0	CLIP associating protein 1	76707	1700030C23Rik|5730583A19Rik|B130045P17Rik|KIAA0622|mCLASP1|mKIAA0622
Clasp1	chr1	+	120216453	120217112	1.33	0	120216453	120217112	1.31	0	120216153	120216802	1.25	0.00877	CLIP associating protein 1	76707	1700030C23Rik|5730583A19Rik|B130045P17Rik|KIAA0622|mCLASP1|mKIAA0622
Mgat5	chr1	+	129133165	129133514	2.47	0	129133165	129133514	1.66	0	129133165	129133614	1.59	0.00183	mannoside acetylglucosaminyltransferase 5	107895	4930471A21Rik|5330407H02Rik|AI480971|GlcNAc-TV
Ppp1r15b	chr1	+	134958132	134958481	2.76	0	134958132	134958481	2.45	0	134958132	134958481	3.05	0	protein phosphatase 1, regulatory (inhibitor) subunit 15b	108954	1810033K10Rik|AI606441|C530022L24Rik|CReP
Ptprc	chr1	-	139991287	139991840	1.82	0	139991587	139991937	1.28	0	139991287	139991840	2.32	0	protein tyrosine phosphatase, receptor type, C	19264	B220|CD45R|Cd45|Ly-5|Lyt-4|T200|loc
Trove2	chr1	-	145534696	145535057	2.24	0	145534696	145535057	1.72	0	145534696	145535057	2.02	0	TROVE domain family, member 2	20822	1810007I17Rik|A530054J02Rik|AI646302|SS-A/Ro|Ssa|Ssa2
Uchl5	chr1	+	145534696	145535057	2.24	0	145534696	145535057	1.72	0	145534696	145535057	2.02	0	ubiquitin carboxyl-terminal esterase L5	56207	5830413B11Rik|Uch37
Ivns1abp	chr1	+	153105565	153106214	1.3	0	153105465	153105821	0.87	0.00306	153105365	153105716	1.67	0.00127	influenza virus NS1A binding protein	117198	1190004M08Rik|1700126I16Rik|AA960440|HSPC068|ND1|NS-1|NS1-BP|Nd1-L|Nd1-S|mKIAA0850
Ivns1abp	chr1	+	153108887	153109839	0.81	0.00442	153109087	153110037	0.76	0.00969	153108787	153109641	1.33	0.00877	influenza virus NS1A binding protein	117198	1190004M08Rik|1700126I16Rik|AA960440|HSPC068|ND1|NS-1|NS1-BP|Nd1-L|Nd1-S|mKIAA0850
Smg7	chr1	-	154666651	154667000	1.69	0	154666651	154667000	0.76	0.00969	154666451	154666804	1.85	0	Smg-7 homolog, nonsense mediated mRNA decay factor (C. elegans)	226517	9430023P16Rik|MGC91209|mKIAA0250
LOC626058	chr1	-	155177299	155177656	1.1	0.00104	155177299	155177656	1.04	0.000621	155177299	155177656	1.55	0.00241	hypothetical LOC626058	626058	-
Tor1aip1	chr1	-	157797485	157797834	1.52	0	157797485	157797834	1.23	0.000241	157797381	157797734	1.89	0	torsin A interacting protein 1	208263	MGC6357
Rabgap1l	chr1	-	162630412	162630769	2.34	0	162629712	162630769	2.15	0	162630412	162630769	2.88	0	RAB GTPase activating protein 1-like	29809	5830411O09Rik|8430421H08Rik|9630005B12Rik|AW049894|HHL|Hh1|mKIAA0471
Prdx6	chr1	-	163088853	163089202	2.27	0	163088853	163089202	1.36	0	163088853	163089202	1.5	0.00279	peroxiredoxin 6	11758	1-cysPrx|9430088D19Rik|AA690119|Aop2|Aop2-rs3|Brp-12|CP-3|GPx|KIAA0106|Ltw-4|Ltw4|Lvtw-4|ORF06|Prdx5|Prdx6-rs3|aiPLA2|mKIAA0106
Prrx1	chr1	-	165128549	165128898	1.82	0	165128549	165128998	0.9	0.00226	165128449	165128809	1.46	0.00307	paired related homeobox 1	18933	A230024N07Rik|AA755424|AI385634|AI843499|K-2|Pmx1|Prx1|mHox
Pou2f1	chr1	-	167771625	167771984	1.62	0	167770825	167771984	1.36	0	167771625	167771984	1.85	0	POU domain, class 2, transcription factor 1	18986	2810482H01Rik|Oct-1|Oct-1A|Oct-1B|Oct-1C|Oct-1L|Oct-1z|Otf-1|Otf1
Cdca1	chr1	-	171368022	171368371	1.2	0.000301	171368022	171368371	1.17	0.00022	171368222	171368679	1.67	0.00127	cell division cycle associated 1	66977	2410003C07Rik|AU044112|C85691|NUF2R
Tomm40l	chr1	-	173059409	173059658	1.88	0	173059409	173059658	1.8	0	173059409	173059658	2.4	0	translocase of outer mitochondrial membrane 40 homolog-like (yeast)	641376	-
Apoa2	chr1	+	173059409	173059658	1.88	0	173059409	173059658	1.8	0	173059409	173059658	2.4	0	apolipoprotein A-II	11807	Alp-2|ApoA-II|ApoAII|Apoa-2|Hdl-1
Ufc1	chr1	-	173131068	173131417	1.39	0	173131068	173131417	0.95	0.0014	173131068	173131417	1.55	0.00241	ubiquitin-fold modifier conjugating enzyme 1	66155	1110021H02Rik|AA062310|ESTM29
Arhgap30	chr1	+	173225136	173225485	2.21	0	173225036	173225385	1.94	0	173224336	173225485	2.1	0	Rho GTPase activating protein 30	226652	6030405P05Rik|FLJ00267|Gm102|MGC99989|mFLJ00267
Usf1	chr1	+	173248695	173248944	2.3	0	173248695	173248944	1.94	0	173248695	173248944	2.96	0	upstream transcription factor 1	22278	-
Ncstn	chr1	-	173919127	173919576	1.01	0.00269	173919127	173919776	0.74	0.00211	173919127	173919576	1.42	0.00458	nicastrin	59287	9430068N19Rik|AA727311|Aph2|Kiaa0253|Nct|mKIAA0253
Copa	chr1	+	173919127	173919576	1.01	0.00269	173919127	173919776	0.74	0.00211	173919127	173919576	1.42	0.00458	coatomer protein complex subunit alpha	12847	AU040324|xenin
Apcs	chr1	-	174732076	174732429	2.21	0	174732076	174732429	2.1	0	174732076	174732429	2.32	0	serum amyloid P-component	20219	Sap
Kmo	chr1	+	177468419	177468775	2.08	0	177468419	177468775	1.28	0	177468519	177468869	1.33	0.00877	kynurenine 3-monooxygenase (kynurenine 3-hydroxylase)	98256	AI046660
Nvl	chr1	-	182980867	182981316	1.17	0	182980867	182981316	0.95	0.0015	182980867	182981316	1.37	0.00672	nuclear VCP-like	67459	1200009I24Rik
LOC433384	chr1	-	183689114	183689568	1.36	0	183689114	183689568	1.15	0.000204	183689114	183689670	1.72	0	hypothetical gene supported by AK040286	433384	-
Hlx1	chr1	-	186435908	186436257	2.56	0	186435908	186436257	2.43	0	186435908	186436257	1.89	0	H2.0-like homeo box 1 (Drosophila)	15284	Hlx
Crry	chr1	-	196831902	196832351	0.97	0.00337	196832102	196832459	0.93	0.00174	196831502	196832351	1.12	0.00619	complement receptor related protein	12946	MGC102484|Mcp|mCRY
Katna1	chr10	+	7416178	7416530	1.94	0	7416078	7416530	1.4	0	7416078	7416530	1.73	0	katanin p60 (ATPase-containing) subunit A1	23924	-
Cited2	chr10	+	17411714	17412763	1.45	0	17412314	17412763	0.79	0.00533	17411814	17412763	1.36	0	Cbp/p300-interacting transactivator, with Glu/Asp-rich carboxy-terminal domain, 2	17684	AI835299|ER154-like|Mrg1|Msg2|p35srj
LOC432436	chr10	+	21377110	21378359	1.76	0	21377910	21378359	0.81	0.0047	21377410	21377968	1.18	0.00842	hypothetical gene supported by AK090213	432436	-
2700019D07Rik	chr10	-	33640126	33640882	2.25	0	33640126	33640675	1.96	0	33639926	33640375	1.91	0	RIKEN cDNA 2700019D07 gene	72580	MGC107205
Tspyl4	chr10	+	33987637	33987986	1.94	0	33987637	33987986	1.04	0.000585	33987537	33987886	1.36	0.00366	TSPY-like 4	72480	2610102M01Rik|B230210I21Rik|D10Bwg0791e
Marcks	chr10	-	36828427	36828783	1.73	0.000194	36828427	36828783	0.91	0.00186	36828327	36828676	1.27	0.00635	myristoylated alanine rich protein kinase C substrate	17118	Macs|PKCSL
5930403N24Rik	chr10	+	36828427	36828783	1.73	0.000194	36828427	36828783	0.91	0.00186	36828327	36828676	1.27	0.00635	RIKEN cDNA 5930403N24 gene	320504	-
2410016F19Rik	chr10	-	39947226	39948381	1.69	0.000176	39947126	39948381	1.09	0.000167	39947826	39948186	1.36	0.00366	RIKEN cDNA 2410016F19 gene	67371	AU019813
Cd164	chr10	+	41207164	41207513	1.31	0.00106	41207264	41207713	0.86	0.00252	41206764	41207313	1.59	0.000263	CD164 antigen	53599	A115|A24|AA589639|AW540279|MGC-24|MSSP
Armc2	chr10	-	41666809	41667158	2.73	0	41666809	41667158	1.65	0	41666809	41667668	1.95	0	armadillo repeat containing 2	213402	2610018I05Rik
Psap	chr10	+	59679667	59680016	1.59	0.000437	59679567	59679916	0.96	0.000944	59679567	59679916	1.5	0.000877	prosaposin	19156	AI037048|SGP-1
Hk1	chr10	-	61735849	61736198	1.66	0.000333	61735849	61736198	1.73	0	61735849	61736198	1.91	0	hexokinase 1	15275	BB404130|Hk-1|Hk1-s|dea|mHk1-s
Vps26a	chr10	-	61881305	61882154	1.42	0.000639	61881205	61881658	0.84	0.0037	61881305	61881658	1.59	0.000263	vacuolar protein sorting 26 homolog A (yeast)	30930	AA407240|HB58|Vps26
Vps26a	chr10	-	61882505	61882962	2.9	0	61882605	61882962	2.29	0	61882505	61882962	2.64	0	vacuolar protein sorting 26 homolog A (yeast)	30930	AA407240|HB58|Vps26
Ddx21	chr10	-	61998965	61999414	1.76	0	61998965	61999414	1.14	0.000188	61998965	61999621	1.73	0.000342	DEAD (Asp-Glu-Ala-Asp) box polypeptide 21	56200	AI255159|AL022742|D10Ertd645e|D10Wsu42e
Rhobtb1	chr10	+	68606216	68606565	1.97	0	68606216	68606565	1.3	0	68606316	68606665	1.32	0.00475	Rho-related BTB domain containing 1	69288	1700008H16Rik|3110048G13Rik|AI173445|AI573858|MGC107538
Gnaz	chr10	+	74408296	74408945	1.63	0.000317	74408096	74409145	1.14	0	74408096	74409045	1.59	0.000263	guanine nucleotide binding protein, alpha z subunit	14687	AI847979|Gz
1700009J07Rik	chr10	+	77295698	77296047	2.11	0	77295698	77296047	1.35	0	77295598	77295948	1.41	0.00213	RIKEN cDNA 1700009J07 gene	75188	4930535B06Rik
2610008E11Rik	chr10	-	78499936	78500196	1.18	0.00796	78499936	78500196	1.35	0	78499936	78500196	1.45	0.00509	RIKEN cDNA 2610008E11 gene	72128	MGC90797
Ndufs7	chr10	+	79652162	79652811	1.04	0.00568	79652162	79652611	0.76	0.00668	79652162	79652611	1.23	0.00991	NADH dehydrogenase (ubiquinone) Fe-S protein 7	75406	1010001M04Rik
Tcfe2a	chr10	-	79836942	79837391	1.42	0	79836842	79837391	1.35	0	79836942	79837391	1.55	0.000702	transcription factor E2a	21423	A1|AA408400|ALF2|AW209082|E12|E12/E47|E2A|E47|ME2|Pan1|Pan2|TCF3|VDIR
Ncln	chr10	-	80899635	80900884	2.11	0	80899635	80899984	1.68	0	80899635	80899984	2.05	0	nicalin homolog (zebrafish)	103425	3100002P13Rik|AW120537
Sirt6	chr10	-	81030513	81030862	1.31	0.00106	81030513	81030862	0.94	0.00145	81030513	81030862	1.36	0.00366	sirtuin 6 (silent mating type information regulation 2, homolog) 6 (S. cerevisiae)	50721	2810449N18Rik
Ankrd24	chr10	+	81030513	81030862	1.31	0.00106	81030513	81030862	0.94	0.00145	81030513	81030862	1.36	0.00366	ankyrin repeat domain 24	70615	4631433D01Rik|5730519E19Rik|D10Bur2e
Rfx4	chr10	+	84267202	84267551	1.63	0.000317	84267102	84267455	1.57	0	84267102	84267455	1.95	0	regulatory factor X, 4 (influences HLA class II expression)	71137	4933412G19Rik|NYD-sp10
Syn3	chr10	-	85898357	85899506	1.24	0	85898057	85899618	0.79	0	85898357	85899306	1.41	0.00416	synapsin III	27204	MGC130403
E030041M21Rik	chr10	+	89174085	89174634	1.11	0.00367	89173885	89174734	0.86	0	89174085	89174634	1.82	0	RIKEN cDNA E030041M21 gene	75089	2010319N22Rik|4930506D01Rik|AA589495|C80672|KIAA0701|mKIAA0701
Usp44	chr10	+	93259718	93260067	1.52	0.000512	93259718	93260067	1.24	0.000229	93259718	93260067	2.09	0	ubiquitin specific peptidase 44	327799	E430004F17Rik
4921537D05Rik	chr10	+	94115253	94115715	1.38	0.000787	94115153	94115511	0.86	0.00252	94115053	94115412	1.23	0.00991	RIKEN cDNA 4921537D05 gene	77048	2600001G24Rik|5730513H21Rik
LOC667315	chr10	+	94115253	94115715	1.38	0.000787	94115153	94115511	0.86	0.00252	94115053	94115412	1.23	0.00991	hypothetical protein LOC667315	667315	-
Syt1	chr10	-	108415279	108415928	1.56	0.000414	108415179	108415928	1.04	0	108415279	108416336	1.14	0	synaptotagmin I	20979	AW124717|G630098F17Rik
Zdhhc17	chr10	-	110414863	110415420	0.9	0.00618	110414863	110415618	0.63	0.00251	110414863	110415312	1.27	0.00635	zinc finger, DHHC domain containing 17	320150	A230053P19Rik|BB187739|D130071N24Rik|HIP3|HYPH|Hip14|mKIAA0946
Rab21	chr10	-	114718407	114718757	2.35	0	114718407	114718757	1.55	0	114718407	114718757	2.64	0	RAB21, member RAS oncogene family	216344	9630024B22
Kcnmb4	chr10	-	115879883	115880238	1.97	0	115879883	115880238	1.27	0.000239	115879883	115880238	1.45	0.00164	potassium large conductance calcium-activated channel, subfamily M, beta member 4	58802	1700058G18Rik|2900045G12Rik
Rab3ip	chr10	-	116354740	116355189	2.42	0	116354740	116355189	1.88	0	116354740	116355189	1.95	0	RAB3A interacting protein	216363	B230311A06|Gtpat12|MGC90794|Rabin3
Tmbim4	chr10	+	119611211	119611860	1.76	0	119611211	119611860	1.88	0	119611211	119612060	1.68	0	transmembrane BAX inhibitor motif containing 4	68212	0610007H07Rik|AU022431
Tbk1	chr10	-	120989957	120990406	1.73	0.000194	120989957	120990306	1.7	0	120989957	120990513	1.95	0	TANK-binding kinase 1	56480	1200008B05Rik|AI462036|AW048562
Stat2	chr10	+	127673051	127673500	1.69	0.000176	127673051	127673500	1.45	0	127673151	127673500	1.59	0.000263	signal transducer and activator of transcription 2	20847	1600010G07Rik|AW496480
Usp52	chr10	+	127706079	127706428	1.76	0	127705979	127706428	0.79	0.00533	127705879	127706428	1.45	0.00155	ubiquitin specific peptidase 52	103135	1200014O24Rik|AI047843|AW742773|mKIAA0710
Mbc2	chr10	-	127929058	127929707	1.49	0	127928958	127929312	1.07	0.000315	127929058	127929707	1.5	0.00188	membrane bound C2 domain containing protein	23943	vp115
Zc3h10	chr10	-	127950343	127950792	1.52	0.000512	127950343	127950792	1.35	0	127950343	127950792	1.55	0.000702	zinc finger CCCH type containing 10	103284	AI790326
Rps26	chr10	-	128029440	128029789	1.24	0.00138	128029340	128029889	1.19	0.000208	128029340	128030296	1.55	0.000702	ribosomal protein S26	27370	-
Dgka	chr10	-	128149205	128149554	2.63	0	128149205	128149554	1.8	0	128149205	128149554	2.68	0	diacylglycerol kinase, alpha	13139	80kDa|AW146112|Dagk1
Wibg	chr10	+	128149205	128149554	2.63	0	128149205	128149554	1.8	0	128149205	128149554	2.68	0	within bgcn homolog (Drosophila)	78428	A030010B05Rik|Pym
1700020C11Rik	chr11	-	3996453	3997010	1.01	0.00676	3996453	3996902	0.83	0.0047	3996653	3997010	1.33	0.00475	RIKEN cDNA 1700020C11 gene	67900	2610507A21Rik|AV005788|Mtp18
Hus1	chr11	-	8911090	8911539	2.24	0	8911090	8911539	1.73	0	8911090	8911539	2.06	0	Hus1 homolog (S. pombe)	15574	mHus1
Spred2	chr11	+	19822233	19822482	1.4	0.00623	19822233	19822482	1.14	0.00188	19822233	19822482	2.11	0	sprouty-related, EVH1 domain containing 2	114716	C79158
Vps54	chr11	+	21137934	21138683	0.77	0.008	21137634	21138483	0.9	0.00207	21137934	21138483	1.33	0.00475	vacuolar protein sorting 54 (yeast)	245944	5330404P15Rik|Hcc8|Vps54l|mSLP8|wr
9130230N09Rik	chr11	-	22765685	22766034	2.06	0	22765685	22766034	1.01	0.000645	22765785	22766148	1.47	0.00164	RIKEN cDNA 9130230N09 gene	77671	-
B3gnt2	chr11	-	22765685	22766034	2.06	0	22765685	22766034	1.01	0.000645	22765785	22766148	1.47	0.00164	UDP-GlcNAc:betaGal beta-1,3-N-acetylglucosaminyltransferase 2	53625	AA408337|AA409404|AW260308|B3Galt6|B3gnt1|Beta3gnt|beta-3Gnt
Pex13	chr11	-	23566056	23566405	1.4	0.000787	23566056	23566405	1.37	0	23566056	23566505	1.83	0	peroxisomal biogenesis factor 13	72129	2610008O20Rik
4933435A13Rik	chr11	+	23566056	23566405	1.4	0.000787	23566056	23566405	1.37	0	23566056	23566505	1.83	0	RIKEN cDNA 4933435A13 gene	74467	2810013G11Rik|AU014648|C77560
Pnpt1	chr11	+	29030393	29030743	1.64	0.000317	29030393	29030743	1.47	0	29030293	29030743	1.79	0.000379	polyribonucleotide nucleotidyltransferase 1	71701	1200003F12Rik|Old35|PNPase|Pnptl1
Mat2b	chr11	-	40537786	40538137	2.1	0	40537686	40538045	1.27	0.000229	40537686	40538137	2.57	0	methionine adenosyltransferase II, beta	108645	1110064C04Rik|2410018D16Rik|AI182287|AU022853|MAT-II|MATIIbeta|TGR
Trim41	chr11	-	48660439	48660988	1.4	0	48660439	48660888	1.4	0	48660439	48660988	1.28	0.00487	tripartite motif-containing 41	211007	AW552703|BC020156|MGC28280|R75223
Irgm	chr11	-	48714619	48714968	2.83	0	48714619	48714968	2.33	0	48714619	48714968	3.07	0	immunity-related GTPase family, M	15944	Ifi1|Iigp3|Iipg3|LRG-47
RP23-14F5.7	chr11	-	48835589	48836338	1.33	0	48835589	48835938	1.03	0.000555	48835589	48836338	1.88	0	hypothetical gene Rp23-14f5.7	620913	MGC6071|Rp23-14f5.7
Tgtp	chr11	-	48835589	48836338	1.33	0	48835589	48835938	1.03	0.000555	48835589	48836338	1.88	0	T-cell specific GTPase	21822	Gtp2|Mg21
9930111J21Rik	chr11	-	48893509	48893758	2.34	0	48893509	48893758	1.29	0	48893509	48893758	1.6	0.00239	RIKEN cDNA 9930111J21 gene	245240	-
Olfr56	chr11	+	48893509	48893758	2.34	0	48893509	48893758	1.29	0	48893509	48893758	1.6	0.00239	olfactory receptor 56	18356	IF7|MOR276-1
Sec24a	chr11	-	51604666	51604915	2.27	0	51604666	51604915	1.45	0	51604666	51604915	1.51	0.00585	SEC24 related gene family, member A (S. cerevisiae)	77371	9430090N21Rik|AI504915
Sar1b	chr11	+	51604666	51604915	2.27	0	51604666	51604915	1.45	0	51604666	51604915	1.51	0.00585	SAR1 gene homolog B (S. cerevisiae)	66397	2310075M17Rik|2900019I22Rik|CMRD|Sara1b|Sara2
Rapgef6	chr11	+	54365220	54366169	1.19	0.00243	54365520	54366369	1.01	0	54365420	54365969	1.47	0.00155	Rap guanine nucleotide exchange factor (GEF) 6	192786	A530068K01|AI844632|BB085664|C030018K18Rik|KIAA4052|PDZ-GEF2|Pdzgef2|RA-GEF-2|Ragef2|mKIAA4052
1700024C24Rik	chr11	-	54706296	54706645	1.54	0.000512	54706296	54706645	1.09	0.000315	54706296	54706645	2.75	0	RIKEN cDNA 1700024C24 gene	75530	9330147L21Rik
Hint1	chr11	+	54706296	54706645	1.54	0.000512	54706296	54706645	1.09	0.000315	54706296	54706645	2.75	0	histidine triad nucleotide binding protein 1	15254	AA673479|Hint|Ipk1|PKCI-1|PRKCNH1
Atox1	chr11	-	55304711	55305060	2.17	0	55304711	55305060	2.33	0	55304711	55305060	2.52	0	ATX1 (antioxidant protein 1) homolog 1 (yeast)	11927	AI256639|Atx1
RP23-336J1.4	chr11	+	55312594	55313143	1.19	0	55312694	55313143	0.8	0.00533	55312494	55312843	1.28	0.00635	Ras-GTPase-activating protein SH3-domain binding protein	27041	AI849976|B430204O07|C87777|G3bp|KIAA4115|mKIAA4115
Igtp	chr11	+	58015542	58015891	2.44	0	58015542	58015891	1.83	0	58015542	58015891	2.34	0	interferon gamma induced GTPase	16145	AW558444
Iigp2	chr11	+	58015542	58015891	2.44	0	58015542	58015891	1.83	0	58015542	58015891	2.34	0	interferon inducible GTPase 2	54396	AI481100|GTPI|MGC102455
Iigp2	chr11	+	58030952	58031301	2.37	0	58030952	58031301	1.55	0	58030952	58031301	2.43	0	interferon inducible GTPase 2	54396	AI481100|GTPI|MGC102455
Hist3h2bb	chr11	-	58775256	58775605	2.03	0	58775356	58775805	0.98	0.000944	58775256	58775605	1.33	0.00475	histone 3, H2bb	382522	4930534G10Rik|4933432H21|B2Hist3h2bb|MGC130256|R75370
LOC382523	chr11	+	58775256	58775605	2.03	0	58775356	58775805	0.98	0.000944	58775256	58775605	1.33	0.00475	similar to histone 1, H2ai (predicted)	382523	-
Trim17	chr11	+	58775256	58775605	2.03	0	58775356	58775805	0.98	0.000944	58775256	58775605	1.33	0.00475	tripartite motif protein 17	56631	Rnf16|terf
Mrpl55	chr11	+	59017861	59018210	2.3	0	59017861	59018210	1.45	0	59017861	59018210	1.88	0	mitochondrial ribosomal protein L55	67212	2810038N09Rik
Top3a	chr11	-	60593386	60593735	1.57	0.000414	60593386	60593735	1.55	0	60593386	60593735	1.24	0.00991	topoisomerase (DNA) III alpha	21975	MGC106383
Smcr8	chr11	+	60593386	60593735	1.57	0.000414	60593386	60593735	1.55	0	60593386	60593735	1.24	0.00991	Smith-Magenis syndrome chromosome region, candidate 8 homolog (human)	237782	2310076G09Rik|AI642055|D030073L15Rik|MGC103295
Tnfrsf13b	chr11	+	60942313	60942966	1.26	0	60942313	60943462	0.85	0	60942313	60942662	1.79	0.000379	tumor necrosis factor receptor superfamily, member 13b	57916	1200009E08Rik|Taci
Aurkb	chr11	+	68859892	68860241	2.1	0	68859892	68860344	1.06	0.000585	68859892	68860344	2.29	0	aurora kinase B	20877	AIM-1|AIRK2|AL022959|Aik2|Aim1|Ark2|AurB|IPL1|STK-1|Stk12|Stk5
Hes7	chr11	+	68934097	68934546	1.12	0.00367	68933997	68934446	0.78	0.00668	68933997	68934546	1.37	0.00478	hairy and enhancer of split 7 (Drosophila)	84653	-
Wdr79	chr11	-	69397453	69397910	1.36	0.00112	69397353	69397702	0.8	0.00533	69396253	69398409	1.42	0.00416	WD repeat domain 79	216853	BC021790|MGC28622
Trp53	chr11	+	69397453	69397910	1.36	0.00112	69397353	69397702	0.8	0.00533	69396253	69398409	1.42	0.00416	transformation related protein 53	22059	bbl|bfy|bhy|p53
Plscr3	chr11	+	69662920	69663274	1.61	0.000437	69662620	69663174	0.88	0	69662920	69663274	1.28	0.00635	phospholipid scramblase 3	70310	2210403O21Rik|2610037N06Rik|ESTM3|X83310
Gabarap	chr11	+	69807125	69807774	1.82	0	69807125	69807774	1.06	0	69807225	69807774	1.24	0.00991	gamma-aminobutyric acid receptor associated protein	56486	-
Phf23	chr11	+	69807125	69807774	1.82	0	69807125	69807774	1.06	0	69807225	69807774	1.24	0.00991	PHD finger protein 23	78246	2410141M05Rik|JUNE-1
Fbxo39	chr11	+	72117607	72117956	1.92	0	72117607	72117956	0.96	0.00145	72117707	72118056	1.6	0.000263	F-box protein 39	327959	-
Ankfy1	chr11	+	72506346	72506799	1.68	0	72505946	72506799	1.11	0.000167	72506246	72506899	1.42	0	ankyrin repeat and FYVE domain containing 1	11736	Ankhzn|ZFYVE14|mKIAA1255
Aspa	chr11	-	73140146	73140505	2.1	0	73140146	73140505	1.01	0.000645	73140146	73140505	2.66	0	aspartoacylase (aminoacylase) 2	11484	Acy-2|Acy2
Mnt	chr11	+	74644668	74645017	2.97	0	74644668	74645017	2.07	0	74644568	74645017	2.89	0	max binding protein	17428	Rox
Myo1c	chr11	+	75469895	75470244	1.57	0.000414	75469795	75470144	1.14	0.000176	75469795	75470144	1.28	0.00635	myosin IC	17913	C80397|MMIb|MYO1E|mm1beta|myr2
1110002N22Rik	chr11	-	79958169	79958518	2.06	0	79958169	79958518	1.37	0	79958169	79958518	1.83	0	RIKEN cDNA 1110002N22 gene	68550	FLJ22729
Cct6b	chr11	-	82579895	82580246	1.71	0.000176	82579895	82580246	1.45	0	82579895	82580246	1.97	0	chaperonin subunit 6b (zeta)	12467	CCTzeta-2|Cctz-2
Ccdc16	chr11	+	82579895	82580246	1.71	0.000176	82579895	82580246	1.45	0	82579895	82580246	1.97	0	coiled-coil domain containing 16	66983	2410003C20Rik|AV301118|AW048207|Omcg1
Slfn8	chr11	-	82836355	82837104	1.47	0	82836355	82837204	0.9	0	82836955	82837308	1.56	0.000702	schlafen 8	276950	MGC30719
Pex12	chr11	-	83114960	83115309	1.05	0.00568	83114960	83115309	1.27	0.000229	83114460	83115209	1.33	0.00475	peroxisomal biogenesis factor 12	103737	AI451906
Ap2b1	chr11	+	83114960	83115309	1.05	0.00568	83114960	83115309	1.27	0.000229	83114460	83115209	1.33	0.00475	adaptor-related protein complex 2, beta 1 subunit	71770	1300012O03Rik|AI788979
Ccl5	chr11	-	83349342	83349700	2.24	0	83349442	83349791	1.24	0.000219	83349342	83349700	2.15	0	chemokine (C-C motif) ligand 5	20304	MuRantes|RANTES|SISd|Scya5|TCP228
Ccl6	chr11	-	83411925	83412374	2.93	0	83411925	83412374	2.33	0	83411925	83412374	2.98	0	chemokine (C-C motif) ligand 6	20305	MRP-1|Scya6|c10
1100001G20Rik	chr11	+	83562443	83562692	2.44	0	83562443	83562692	1.34	0	83562443	83562692	1.97	0	RIKEN cDNA 1100001G20 gene	66107	-
Dynll2	chr11	-	87804069	87804418	1.89	0	87803969	87804418	1.42	0	87804069	87804418	2.2	0	dynein light chain LC8-type 2	68097	1700064A15Rik|6720463E02Rik|C87222|Dlc2
Trim25	chr11	+	88815278	88815627	2.3	0	88815278	88815627	1.94	0	88815278	88815627	2.38	0	tripartite motif protein 25	217069	AA960166|AL022677|EFP|Zfp147
Zfpn1a3	chr11	-	98366134	98366483	2.13	0	98366134	98366483	1.76	0	98366134	98366583	1.33	0.00475	zinc finger protein, subfamily 1A, 3 (Aiolos)	22780	5830411O07Rik|Aiolos|Znfn1a3
Zpbp2	chr11	+	98366134	98366483	2.13	0	98366134	98366483	1.76	0	98366134	98366583	1.33	0.00475	zona pellucida binding protein 2	69376	1700017D11Rik|2610022C02Rik|MGC107119|ZPBPL
Cnp1	chr11	+	100391215	100391564	2.3	0	100391215	100391564	1.47	0	100391215	100391564	1.88	0	cyclic nucleotide phosphodiesterase 1	12799	CNPase|Cnp|Cnp-1
Atp6v0a1	chr11	+	100824294	100825443	2.37	0	100824294	100825443	2.33	0	100824794	100825443	2.34	0	ATPase, H+ transporting, lysosomal V0 subunit A1	11975	AA959968|ATP6a1|Atp6n1|Atp6n1a|Atpv0a1|Vpp-1|Vpp1
Atp6v0a1	chr11	+	100824294	100825443	2.37	0	100824294	100825443	2.33	0	100824294	100824743	2.89	0	ATPase, H+ transporting, lysosomal V0 subunit A1	11975	AA959968|ATP6a1|Atp6n1|Atp6n1a|Atpv0a1|Vpp-1|Vpp1
Vps25	chr11	+	101069082	101069767	2.03	0	101068982	101069767	1.27	0	101068982	101069531	1.88	0	vacuolar protein sorting 25 (yeast)	28084	1110020N13Rik|AW107467|D11Wsu68e
Ifi35	chr11	+	101264424	101264874	1.78	0	101264424	101264773	1.55	0	101264424	101264773	2.11	0	interferon-induced protein 35	70110	2010008K16Rik|AW986054|IFP35
Brca1	chr11	-	101368160	101368609	1.29	0	101368160	101368914	0.88	0.00252	101368160	101369209	1.47	0.00155	breast cancer 1	12189	-
Nbr1	chr11	+	101368160	101368609	1.29	0	101368160	101368914	0.88	0.00252	101368160	101369209	1.47	0.00155	neighbor of Brca1 gene 1	17966	mKIAA0049
D11Ertd333e	chr11	-	102224112	102224861	0.98	0.00316	102224012	102224861	0.59	0.0017	102224212	102224561	1.28	0.00635	DNA segment, Chr 11, ERATO Doi 333, expressed	68066	3010027G13Rik
Hexim2	chr11	+	102948953	102949304	1.64	0.000317	102948953	102949304	1.16	0.000188	102948753	102949602	1.24	0.00585	hexamthylene bis-acetamide inducible 2	71059	4933402L21Rik
Pecam1	chr11	-	106567642	106567992	2.06	0	106567642	106567992	1.52	0	106567642	106567992	1.92	0	platelet/endothelial cell adhesion molecule 1	18613	Cd31|MGC102160|PECAM-1|Pecam
Gm885	chr11	+	106567642	106567992	2.06	0	106567642	106567992	1.52	0	106567642	106567992	1.92	0	gene model 885, (NCBI)	380732	-
X83328	chr11	+	109241485	109241834	1.47	0.000684	109241485	109241834	1.09	0.000315	109241485	109241834	1.47	0.00164	EST X83328	13929	AA408420|Amz2|ESTM12
Hmgb1	chr11	+	115398904	115399253	3.11	0	115398904	115399253	2.22	0	115398904	115399253	1.37	0.00366	high mobility group box 1	15289	Hmg1|MGC103168|MGC103169|MGC117896|MGC117897
Caskin2	chr11	-	115629878	115630227	1.57	0.000414	115629878	115630227	1.14	0.000176	115629778	115630227	1.33	0.00475	cask-interacting protein 2	140721	mKIAA1139
Tsen54	chr11	+	115629878	115630227	1.57	0.000414	115629878	115630227	1.14	0.000176	115629778	115630227	1.33	0.00475	tRNA splicing endonuclease 54 homolog (SEN54, S. cerevisiae)	76265	0610034P02Rik
1110014K08Rik	chr11	+	116249734	116250083	2.55	0	116249734	116250083	1.94	0	116249734	116250183	1.51	0.000877	RIKEN cDNA 1110014K08 gene	319370	D030012E24Rik
LOC667594	chr11	+	119209007	119209456	1.54	0.000512	119208907	119209156	0.96	0.0043	119209007	119209456	1.37	0.00366	hypothetical protein LOC667594	667594	-
Sectm1	chr11	-	120880146	120880495	1.75	0.000194	120880146	120880495	1.55	0	120880146	120880495	1.74	0.000342	secreted and transmembrane 1	58210	1810003C24Rik|K12
BC017643	chr11	-	121044740	121045189	2.97	0	121044740	121045089	1.81	0	121044640	121045189	2.89	0	cDNA sequence BC017643	217370	MGC28978|MGC37062|MGC37382
Dnmt3a	chr12	+	3890907	3891256	1.67	0.000176	3890907	3891364	1.38	0	3891007	3891364	1.88	0	DNA methyltransferase 3A	13435	AU015806|W91664
Laptm4a	chr12	+	8948468	8948822	2.39	0	8948468	8948822	1.76	0	8948468	8948822	1.69	0.000313	lysosomal-associated protein transmembrane 4A	17775	AA286466|LAPTM4|MTP|Mtrp|mKIAA0108
Gdap10	chr12	+	33406247	33406702	1.91	0	33406047	33406797	1.48	0	33406447	33406920	1.24	0.00991	ganglioside-induced differentiation-associated-protein 10	14546	-
Pbef1	chr12	+	33406247	33406702	1.91	0	33406047	33406797	1.48	0	33406447	33406920	1.24	0.00991	pre-B-cell colony-enhancing factor 1	59027	1110035O14Rik|AI314458|Nampt|Pbef|Visfatin
Atxn7l1	chr12	+	33888147	33888496	2.49	0	33888047	33888496	1.81	0	33888047	33888496	1.74	0.000342	ataxin 7-like 1	380753	-
Etv1	chr12	+	39288597	39289046	1.57	0.000437	39288597	39289446	0.9	0	39288497	39288846	2.29	0	ets variant gene 1	14009	ER81|Etsrp81
LOC665355	chr12	-	56148563	56148912	1.06	0.00445	56148063	56148512	0.95	0.000944	56148563	56148912	1.33	0.00475	similar to phosphatase subunit gene g4-1	665355	-
Srp54	chr12	+	56148563	56148912	1.06	0.00445	56148063	56148512	0.95	0.000944	56148563	56148912	1.33	0.00475	signal recognition particle 54	24067	54kDa
6330442E10Rik	chr12	-	79899536	79899885	2.52	0	79899536	79899885	1.46	0	79899536	79899985	1.74	0	RIKEN cDNA 6330442E10 gene	268567	9830138K24|AU019070
6330442E10Rik	chr12	-	79925467	79925916	2.22	0	79925367	79925716	1.41	0	79925367	79925916	1.46	0.00155	RIKEN cDNA 6330442E10 gene	268567	9830138K24|AU019070
Zfyve26	chr12	-	80214571	80215120	1.64	0	80214571	80215120	1.26	0.000239	80214471	80214822	1.42	0.00213	zinc finger, FYVE domain containing 26	211978	4930465A13|9330197E15Rik|A630028O16Rik|Gm893|KIAA0321|mKIAA0321
Rad51l1	chr12	+	80214571	80215120	1.64	0	80214571	80215120	1.26	0.000239	80214471	80214822	1.42	0.00213	RAD51-like 1 (S. cerevisiae)	19363	AI553500|R51H2|Rad51b|mREC2
Erh	chr12	-	81562708	81563157	1.94	0	81562808	81563157	1.73	0	81562808	81563157	2.11	0	enhancer of rudimentary homolog (Drosophila)	13877	MGC103398|MGC130271|MGC130272|Mer|Prei1
Slc39a9	chr12	+	81562708	81563157	1.94	0	81562808	81563157	1.73	0	81562808	81563157	2.11	0	solute carrier family 39 (zinc transporter), member 9	328133	2010002A02Rik|2610511I23Rik|4833420E20Rik|AW209151
1810020G14Rik	chr12	-	82403641	82403990	1.06	0.00445	82403741	82404096	0.75	0.00668	82403641	82404096	1.42	0.00213	RIKEN cDNA 1810020G14 gene	66272	1810055I05Rik|BB388670|MGC118423
Entpd5	chr12	-	85297811	85298160	2.52	0	85297611	85298160	1.31	0	85297611	85298060	2.06	0	ectonucleoside triphosphate diphosphohydrolase 5	12499	AI196558|AI987697|Cd39l4|ER-UDPase|NTPDase-5|NTPDase5|Pcph|mNTPase
2900006K08Rik	chr12	+	85297811	85298160	2.52	0	85297611	85298160	1.31	0	85297611	85298060	2.06	0	RIKEN cDNA 2900006K08 gene	72873	AI427784
LOC667004	chr12	+	85297811	85298160	2.52	0	85297611	85298160	1.31	0	85297611	85298060	2.06	0	hypothetical protein LOC667004	667004	-
6430527G18Rik	chr12	-	87774104	87774453	1.43	0.000684	87774004	87774453	1.26	0.000239	87774004	87774453	1.24	0.00991	RIKEN cDNA 6430527G18 gene	238330	-
2310044G17Rik	chr12	+	87839509	87839858	1.47	0.000606	87839309	87839858	1.1	0.000176	87839309	87839758	1.33	0.00475	RIKEN cDNA 2310044G17 gene	217732	AI842544|AI853744|mKIAA1737
LOC625794	chr12	-	93292351	93292704	3.07	0	93292251	93292607	2.26	0	93292251	93292704	2.88	0	hypothetical protein LOC625794	625794	-
Cpsf2	chr12	+	102376254	102376603	1.57	0.000437	102376254	102376603	1.28	0	102376254	102376603	1.56	0.000702	cleavage and polyadenylation specific factor 2	51786	100kDa|2610024B04Rik|AI662483|Cpsf|MCPSF|mKIAA1367
Cpsf2	chr12	+	102376954	102377603	1.47	0.000606	102377154	102377503	1.43	0	102377254	102377603	1.6	0.000263	cleavage and polyadenylation specific factor 2	51786	100kDa|2610024B04Rik|AI662483|Cpsf|MCPSF|mKIAA1367
D12Ertd647e	chr12	+	103835110	103835464	1.84	0	103835210	103835659	1.18	0.000208	103835110	103835464	1.42	0.00213	DNA segment, Chr 12, ERATO Doi 647, expressed	52668	1110013J02Rik|2900026P10Rik|ISG12a
C630028L02Rik	chr12	-	106085183	106085532	0.99	0.00676	106085083	106085532	0.95	0.000944	106085083	106085532	1.24	0.00991	RIKEN cDNA C630028L02 gene	319361	-
4933433P14Rik	chr12	+	106085183	106085532	0.99	0.00676	106085083	106085532	0.95	0.000944	106085083	106085532	1.24	0.00991	RIKEN cDNA 4933433P14 gene	66787	FLJ20789
BC016423	chr13	-	3610092	3610441	1.82	0	3610092	3610541	1.41	0	3609992	3610441	1.25	0.00991	cDNA sequence BC016423	105203	AI645998|KIAA2006|MGC25933|Pap20|mKIAA2006
Zmynd11	chr13	-	9766548	9766897	1.47	0.000684	9766648	9767100	0.91	0.00207	9766548	9767100	1.85	0	zinc finger, MYND domain containing 11	66505	2210402G22Rik
Lgals8	chr13	-	12514969	12515818	2.32	0	12514969	12515818	1.38	0	12514969	12515818	2.35	0	lectin, galactose binding, soluble 8	56048	1200015E08Rik|AI326142|D13Ertd524e|Lgals-8
Ggps1	chr13	-	13854167	13855019	2.21	0	13854167	13855019	1.59	0	13854670	13855019	1.98	0	geranylgeranyl diphosphate synthase 1	14593	1810026C22Rik|9530089B04Rik|AI843169|C79210
Arid4b	chr13	+	13854167	13855019	2.21	0	13854167	13855019	1.59	0	13854670	13855019	1.98	0	AT rich interactive domain 4B (Rbp1 like)	94246	5930400I17|6330417L24Rik|6720480E17Rik|9330186M13|BCAA|BRCAA1|RBBP1L1|Rbp1l1|SAP180
Mrpl32	chr13	-	14405744	14406098	1.47	0.000684	14405544	14405993	1.57	0	14405744	14406098	1.61	0.000263	mitochondrial ribosomal protein L32	75398	0610033O15Rik
Psma2	chr13	+	14405744	14406098	1.47	0.000684	14405544	14405993	1.57	0	14405744	14406098	1.61	0.000263	proteasome (prosome, macropain) subunit, alpha type 2	19166	Lmpc3
Elmo1	chr13	+	20097733	20098182	2.03	0	20097733	20098182	1.62	0	20097533	20098082	1.89	0	engulfment and cell motility 1, ced-12 homolog (C. elegans)	140580	6330578D22Rik|AI173001|C230095H21Rik|CED-12|KIAA0281|mKIAA0281
Zfp96	chr13	+	21370077	21370526	1.33	0.00106	21369977	21370426	1.36	0	21370077	21370526	1.52	0.000877	zinc finger protein 96	22758	2510038J07Rik|FPM315|mKIAA0426
Hist1h2an	chr13	-	21795792	21796144	1.4	0.000787	21794991	21796543	1.07	0.000585	21795592	21796041	1.25	0.00991	histone 1, H2an	319170	-
Hist1h3i	chr13	-	21795792	21796144	1.4	0.000787	21794991	21796543	1.07	0.000585	21795592	21796041	1.25	0.00991	histone 1, H3i	319153	H3-H
Hist1h2bp	chr13	+	21795792	21796144	1.4	0.000787	21794991	21796543	1.07	0.000585	21795592	21796041	1.25	0.00991	histone 1, H2bp	319188	-
Hist1h2af	chr13	+	23537294	23538843	1.72	0	23537294	23539554	1.17	0	23537194	23538743	1.48	0	histone 1, H2af	319173	H2a-221
Hist1h3g	chr13	+	23537294	23538843	1.72	0	23537294	23539554	1.17	0	23537194	23538743	1.48	0	histone 1, H3g	97908	H3.1-221|M32460
Hist1h4h	chr13	+	23537294	23538843	1.72	0	23537294	23539554	1.17	0	23537194	23538743	1.48	0	histone 1, H4h	69386	1700024H08Rik|MGC41466
4930558J22Rik	chr13	-	23768655	23769004	2.35	0	23768655	23769104	1.41	0	23768655	23769104	1.8	0.000379	RIKEN cDNA 4930558J22 gene	218102	germinal histone H4 gene
Hist1h3a	chr13	-	23768655	23769004	2.35	0	23768655	23769104	1.41	0	23768655	23769104	1.8	0.000379	histone 1, H3a	360198	-
Hist1h4a	chr13	-	23768655	23769004	2.35	0	23768655	23769104	1.41	0	23768655	23769104	1.8	0.000379	histone 1, H4a	326619	-
Hist1h1a	chr13	+	23768655	23769004	2.35	0	23768655	23769104	1.41	0	23768655	23769104	1.8	0.000379	histone 1, H1a	80838	H1.1|H1a|H1f1|H1var3
Irf4	chr13	+	30754664	30755013	2.32	0	30754664	30755013	1.88	0	30754764	30755118	1.85	0	interferon regulatory factor 4	16364	AI385587|LSIRF|Spip
Exoc2	chr13	-	30980878	30981627	1.26	0	30980978	30981627	1.51	0	30980878	30981227	1.8	0.000379	exocyst complex component 2	66482	2410030I24Rik|AI648199|Sec5|Sec5l1
LOC432743	chr13	+	30980878	30981627	1.26	0	30980978	30981627	1.51	0	30980878	30981227	1.8	0.000379	hypothetical gene supported by AK077314	432743	-
Fars2	chr13	+	36122125	36122483	1.19	0.00243	36122125	36122574	0.91	0.00207	36122225	36122574	2.44	0	phenylalanine-tRNA synthetase 2 (mitochondrial)	69955	2810431B21Rik|6720478K01Rik|Fars1
Ly86	chr13	+	37352760	37353209	1.75	0	37352560	37353309	0.83	0.0047	37352560	37353209	2.08	0	lymphocyte antigen 86	17084	MD-1|MD1
Tcfap2a	chr13	-	40741170	40742199	1.23	0.0022	40741650	40741999	0.86	0.0037	40741650	40741999	1.25	0.00991	transcription factor AP-2, alpha	21418	AP-2|Ap2|Ap2tf
9530008L14Rik	chr13	-	41860412	41860668	2.14	0	41860412	41860668	1.7	0	41860412	41860668	2.35	0	RIKEN cDNA 9530008L14 gene	109254	-
Gadd45g	chr13	+	51858438	51858896	2.28	0	51858038	51859687	1.85	0	51858438	51859587	2.54	0	growth arrest and DNA-damage-inducible 45 gamma	23882	AI327420|C86281|CR6|DDIT2|OIG37
Arl10	chr13	+	54582236	54582593	1.79	0	54582236	54582593	1.43	0	54582236	54582593	1.43	0.00213	ADP-ribosylation factor-like 10	56795	Arl10a|Arm1
Hk3	chr13	-	55032294	55032643	2.49	0	55032294	55032643	1.96	0	55031894	55032643	1.94	0	hexokinase 3	212032	-
Zcchc6	chr13	-	59831974	59832323	1.75	0.000194	59831974	59832323	1.33	0	59832074	59832625	1.43	0.00213	zinc finger, CCHC domain containing 6	214290	6030448M23Rik|AA420405|MGC38585
Ptch1	chr13	-	63575392	63575841	1.09	0.00445	63575292	63576145	0.94	0	63575292	63576347	1.75	0	patched homolog 1	19206	A230106A15Rik|Ptc|Ptc1|Ptch|mes
Arts1	chr13	+	75105442	75105791	2.95	0	75105442	75105791	2.24	0	75105442	75105791	2.91	0	type 1 tumor necrosis factor receptor shedding aminopeptidase regulator	80898	ERAAP|PILSA|PILSAP
Arsk	chr13	-	76563685	76564558	1.44	0.000639	76563685	76564765	1.23	0	76563385	76564458	1.71	0.000313	arylsulfatase K	77041	2810429K17Rik|4833414G15Rik
AK129128	chr13	+	76563685	76564558	1.44	0.000639	76563685	76564765	1.23	0	76563385	76564458	1.71	0.000313	cDNA sequence AK129128	218343	KIAA0372|mKIAA0372
Mef2c	chr13	+	84001563	84001912	1.44	0.000639	84000963	84001912	0.83	0	84001363	84001912	1.29	0.00487	myocyte enhancer factor 2C	17260	5430401D19Rik|9930028G15Rik|AV011172
Mef2c	chr13	+	84049652	84050210	2.1	0	84049652	84050210	1.62	0	84049652	84050210	2.31	0	myocyte enhancer factor 2C	17260	5430401D19Rik|9930028G15Rik|AV011172
C130071C03Rik	chr13	+	84211631	84211980	2.07	0	84211631	84212184	1.33	0	84211231	84212280	1.15	0	RIKEN cDNA C130071C03 gene	320203	-
F2rl1	chr13	-	96635015	96635368	2.7	0	96635015	96635368	1.1	0.000315	96635015	96635368	2.08	0	coagulation factor II (thrombin) receptor-like 1	14063	Gpcr11|PAR-2|Par2
Birc1f	chr13	-	101417623	101417972	2.17	0	101417523	101417879	1.04	0.000555	101417523	101417879	1.66	0.000291	baculoviral IAP repeat-containing 1f	17952	Naip-rs4|Naip-rs4A|Naip6
Birc1g	chr13	-	101417623	101417972	2.17	0	101417523	101417879	1.04	0.000555	101417523	101417879	1.66	0.000291	baculoviral IAP repeat-containing 1g	53880	Naip-rs4B|Naip6|Naip7
Slc30a5	chr13	-	101924667	101925025	2.32	0	101924667	101925025	1.83	0	101924667	101925025	2.68	0	solute carrier family 30 (zinc transporter), member 5	69048	1810010K08Rik|AF233321|ZNT5|ZTL1|ZnT-5|Zntl1
Adamts6	chr13	+	105406266	105406615	2.74	0	105406266	105406615	1.83	0	105406266	105406615	2.68	0	a disintegrin-like and metallopeptidase (reprolysin type) with thrombospondin type 1 motif, 6	108154	5031426K13|A930019D11Rik|ADAM-TS6
Adamts6	chr13	+	105406866	105407618	1.4	0.000787	105406866	105407515	0.81	0.00533	105406766	105407315	1.38	0.00366	a disintegrin-like and metallopeptidase (reprolysin type) with thrombospondin type 1 motif, 6	108154	5031426K13|A930019D11Rik|ADAM-TS6
Parp8	chr13	-	118147525	118147887	3.16	0	118147525	118147887	2.35	0	118147525	118147887	2.4	0	poly (ADP-ribose) polymerase family, member 8	52552	2810430O08Rik|D13Ertd275e
Oxsm	chr14	-	15044930	15045283	1.61	0.000333	15044930	15045283	0.96	0.000645	15045030	15045383	1.35	0.00366	3-oxoacyl-ACP synthase, mitochondrial	71147	4933425A18Rik|C80494
Nudt13	chr14	+	19083102	19083455	1.95	0	19083102	19083455	1.53	0	19083102	19083455	1.72	0.000342	nudix (nucleoside diphosphate linked moiety X)-type motif 13	67725	4933433B15Rik
AA536717	chr14	+	19129019	19129769	1.71	0	19129019	19129871	1.26	0	19129019	19129769	1.22	0.00877	expressed sequence AA536717	105428	MGC32264|mKIAA0974
Tspan14	chr14	-	39876870	39877221	2.89	0	39876870	39877221	2.22	0	39876870	39877221	2.57	0	tetraspanin 14	52588	AA958793|D14Ertd226e|MGC36554|Tm4sf14
Rnase4	chr14	+	50011450	50011799	1.38	0.000639	50011450	50012599	0.77	0	50011550	50012107	1.4	0	ribonuclease, RNase A family 4	58809	C730049F20Rik|RNase 4
Rnase4	chr14	+	50011950	50012599	1.07	0	50011450	50012599	0.77	0	50011550	50012107	1.4	0	ribonuclease, RNase A family 4	58809	C730049F20Rik|RNase 4
Rab2b	chr14	-	51201244	51201693	1.61	0.000333	51201144	51202097	1.14	0	51201644	51202097	1.63	0.000291	RAB2B, member RAS oncogene family	76338	1500012D09Rik|A230002G14|D530043M21Rik
5730589K01Rik	chr14	+	51201244	51201693	1.61	0.000333	51201144	51202097	1.14	0	51201644	51202097	1.63	0.000291	RIKEN cDNA 5730589K01 gene	268741	A630040M18|AA410149|LCP1
Psme2	chr14	-	54544210	54545159	2.05	0	54544210	54545159	1.46	0	54544510	54545159	2.08	0	proteasome (prosome, macropain) 28 subunit, beta	19188	AA589371|AI788882|PA28b
Psme2b-ps	chr14	-	54544210	54545159	2.05	0	54544210	54545159	1.46	0	54544510	54545159	2.08	0	protease (prosome, macropain) 28 subunit beta B, pseudogene	19191	PA28b-p|PA28b2|Psme2-like|Psme2b
Rnf31	chr14	+	54544210	54545159	2.05	0	54544210	54545159	1.46	0	54544510	54545159	2.08	0	ring finger protein 31	268749	AL033293|BC031509|Flj10111|Paul|mFLJ00217
Isgf3g	chr14	+	54558130	54558479	1.01	0.00568	54558230	54558579	0.84	0.00252	54558030	54558479	1.4	0.00213	interferon dependent positive acting transcription factor 3 gamma	16391	Irf-9|p48
Rabggta	chr14	-	54678497	54678848	2.18	0	54678497	54679346	1.78	0	54678397	54678746	2.53	0	Rab geranylgeranyl transferase, a subunit	56187	gm
Cbln3	chr14	-	54840089	54840438	1.81	0	54840089	54840538	1.31	0	54839989	54840338	1.76	0.000379	cerebellin 3 precursor protein	56410	-
Phf11	chr14	-	58251576	58251925	2.08	0	58251576	58251925	1.46	0	58251376	58251925	1.54	0.00202	PHD finger protein 11	219131	4933417L10Rik
D14Ertd668e	chr14	-	58319504	58319853	1.65	0.000176	58319404	58319755	0.84	0.00252	58319504	58319853	1.94	0	DNA segment, Chr 14, ERATO Doi 668, expressed	219132	MGC29273
Fdft1	chr14	-	62132253	62132603	1.95	0	62132253	62132603	1.48	0	62132253	62132702	1.4	0.00213	farnesyl diphosphate farnesyl transferase 1	14137	SQS|SS
Pdlim2	chr14	-	68910256	68910705	2.15	0	68910456	68910812	1.41	0	68910456	68910812	2.3	0	PDZ and LIM domain 2	213019	MGC37634|Slim|mystique
Cysltr2	chr14	-	71783994	71784346	1.85	0	71783994	71784346	1.11	0.000188	71783994	71784346	1.54	0.000702	cysteinyl leukotriene receptor 2	70086	2300001H05Rik|CYSLT2R|Cltr2|Cyslt2
Lrch1	chr14	+	73678272	73678921	2.35	0	73678272	73678621	2.02	0	73677872	73678621	2.3	0	leucine-rich repeats and calponin homology (CH) domain containing 1	380916	4832412D13Rik|AI552548|AW215503|Chdc1|mKIAA1016
Lrch1	chr14	-	73682072	73682438	1.14	0.00243	73682072	73683129	0.67	0.00316	73682072	73682438	1.85	0	leucine-rich repeats and calponin homology (CH) domain containing 1	380916	4832412D13Rik|AI552548|AW215503|Chdc1|mKIAA1016
Tpt1	chr14	+	74578677	74579026	2.18	0	74578777	74579126	2.15	0	74578677	74579026	1.67	0.000313	tumor protein, translationally-controlled 1	22070	TCTP|Trt
4933415L06Rik	chr14	+	75767676	75767925	2.25	0	75767676	75767925	1.11	0.00202	75767776	75768525	1.17	0.00842	RIKEN cDNA 4933415L06 gene	108811	MGC106895
Epsti1	chr14	+	76638395	76638844	1.24	0.00115	76638395	76638844	1.26	0	76638195	76638951	1.54	0.00202	epithelial stromal interaction 1 (breast)	108670	2310046K10Rik|5033415K03Rik|BRESI1
Narg1l	chr14	-	78127517	78127877	2.15	0	78127517	78127877	1.16	0.000208	78127517	78127877	1.67	0.000313	NMDA receptor regulated 1-like	66897	1300019C06Rik
Mtrf1	chr14	+	78127517	78127877	2.15	0	78127517	78127877	1.16	0.000208	78127517	78127877	1.67	0.000313	mitochondrial translational release factor 1	211253	A830062K05Rik|MGC19099
Elf1	chr14	+	78249591	78250540	1.78	0	78249591	78249941	1.28	0	78249591	78249941	2.26	0	E74-like factor 1	13709	Elf-1|Sts1|mElf-1|p70
Cldn10	chr14	-	117722198	117722547	1.85	0	117722198	117722547	1.14	0.000198	117722298	117722647	1.72	0.000342	claudin 10	58187	6720456I16Rik|D14Ertd728e
Gpr18	chr14	-	121051508	121051865	2.01	0	121051508	121052467	1.41	0	121051508	121052357	1.9	0	G protein-coupled receptor 18	110168	-
Fbxo43	chr15	-	36112433	36112685	1.99	0	36112433	36112685	1.02	0.00139	36112433	36112685	1.67	0.00277	F-box protein 43	78803	4930533G20Rik|Emi2|MGC107440
Ebag9	chr15	+	44448328	44448677	1.44	0.000684	44447828	44449277	0.62	0	44448028	44448580	1.39	0.00366	estrogen receptor-binding fragment-associated gene 9	55960	MGC118417|Rcas1
Mrpl13	chr15	-	55387340	55387689	2.78	0	55387340	55387689	2.07	0	55387340	55387689	2.09	0	mitochondrial ribosomal protein L13	68537	1110002D09Rik
Mtbp	chr15	+	55387340	55387689	2.78	0	55387340	55387689	2.07	0	55387340	55387689	2.09	0	Mdm2, transformed 3T3 cell double minute p53 binding protein	105837	AI429604|MDM2BP
Atad2	chr15	-	57965202	57965551	1.54	0.000414	57965102	57965551	0.87	0.00207	57965302	57965656	1.58	0.000702	ATPase family, AAA domain containing 2	70472	2610509G12Rik|MGC38189
8230402K04Rik	chr15	-	58154102	58154451	0.99	0.00676	58154102	58154451	0.95	0.000944	58154102	58154451	1.25	0.00991	RIKEN cDNA 8230402K04 gene	268807	-
E430025E21Rik	chr15	-	59183060	59183409	2.71	0	59183060	59183409	1.97	0	59183060	59183409	2.04	0	RIKEN cDNA E430025E21 gene	223593	AL022848|C76463|MGC31278|mKIAA0196
Sla	chr15	-	66643512	66643861	2.5	0	66642612	66643861	2.19	0	66643512	66643861	2.78	0	src-like adaptor	20491	Slap|Slap-1
Ptk2	chr15	-	73250997	73251350	2.57	0	73250597	73251448	1.52	0	73250997	73251448	2.46	0	PTK2 protein tyrosine kinase 2	14083	FAK|FRNK|Fadk|KIAA4203|mKIAA4203
Plec1	chr15	-	76070402	76070951	1.82	0	76070402	76070751	1.6	0	76070402	76070951	1.9	0	plectin 1	18810	AA591047|AU042537|EBS1|PCN|PLTN
Grina	chr15	+	76070402	76070951	1.82	0	76070402	76070751	1.6	0	76070402	76070951	1.9	0	glutamate receptor, ionotropic, N-methyl D-asparate-associated protein 1 (glutamate binding)	66168	1110025J15Rik|Lag
1110038F14Rik	chr15	+	76775723	76776072	1.82	0	76775723	76776072	1.35	0	76775723	76776072	2.22	0	RIKEN cDNA 1110038F14 gene	117171	-
Ncf4	chr15	+	78071938	78072387	1.44	0.000684	78071938	78072494	0.77	0.0015	78071938	78072787	1.34	0.00475	neutrophil cytosolic factor 4	17972	AI451400|p40phox
C730048E16Rik	chr15	-	78890464	78890916	1.23	0.00138	78890264	78890813	0.9	0.00186	78890264	78890813	1.44	0.00213	RIKEN cDNA C730048E16 gene	223690	EST1068184|EST475269|MGC25673
Tob2	chr15	-	81685062	81685811	1.13	0	81685462	81686021	0.7	0.00394	81685362	81685711	1.67	0.000291	transducer of ERBB2, 2	57259	2900090N22Rik|4930545K18Rik|AV071822|mKIAA1663
Tob2	chr15	-	81687072	81687521	1.2	0.0022	81687072	81687423	1.5	0	81686872	81687221	1.25	0.00991	transducer of ERBB2, 2	57259	2900090N22Rik|4930545K18Rik|AV071822|mKIAA1663
Amigo2	chr15	-	97076312	97076761	2.19	0	97076312	97076761	1.6	0	97076012	97076761	2.69	0	adhesion molecule with Ig like domain 2	105827	AI415330|AW208913|Ali1
Rhebl1	chr15	-	98708905	98709954	1.75	0	98709105	98709758	1.4	0	98709005	98709758	1.48	0.00155	Ras homolog enriched in brain like 1	69159	1810036J22Rik
Tuba2	chr15	-	98764977	98765526	1.58	0.000437	98765177	98765526	1.55	0	98765177	98765526	1.44	0.00213	tubulin, alpha 2	22143	MGC102558|MGC117866|MGC118411
Mcrs1	chr15	-	99080813	99081062	1.2	0.00724	99080813	99081062	0.9	0.0094	99080813	99081062	1.48	0.00509	microspherule protein 1	51812	C78274|ICP22BP|MGC103140|MGC117915|MSP58|P78
Mettl7a	chr15	+	100129672	100130021	2.6	0	100129672	100130021	2.19	0	100129572	100130021	1.62	0.000263	methyltransferase like 7A	70152	2210414H16Rik|3300001H21Rik|Aam-B|UbiE1
Mettl7a	chr15	+	100131500	100131858	1.82	0	100131600	100132549	1.05	0	100131700	100132549	1.67	0	methyltransferase like 7A	70152	2210414H16Rik|3300001H21Rik|Aam-B|UbiE1
1110034O07Rik	chr15	+	102030431	102031580	0.89	0.00618	102030731	102031580	0.67	0.00444	102031031	102031580	1.48	0.00164	RIKEN cDNA 1110034O07 gene	68744	AW548228
Aaas	chr15	-	102178744	102179194	1.71	0.000194	102178744	102179298	1.05	0	102178744	102179194	1.62	0.000263	achalasia, adrenocortical insufficiency, alacrimia	223921	AAA|ADRACALA|D030041N15Rik|GL003
Hoxc10	chr15	+	102791879	102792235	2.16	0	102791879	102792235	1.2	0.000219	102791879	102792235	2.22	0	homeo box C10	209448	AI506621|Hox-3.6
Zfp385	chr15	-	103161711	103162060	2.64	0	103161711	103162060	1.77	0	103161711	103162060	2.32	0	zinc finger protein 385	29813	Hzf
Zfp263	chr16	+	3659308	3659757	2.7	0	3659308	3659757	2.17	0	3659608	3660160	1.33	0.00475	zinc finger protein 263	74120	1200014J04Rik|AI326880|AU020888|NT2
C2ta	chr16	+	10400905	10401854	1.66	0.000176	10400905	10401854	1.2	0.000219	10401505	10401854	1.6	0.000263	class II transactivator	12265	CIITA|MGC130299
Socs1	chr16	-	10699064	10699413	2.81	0	10699064	10699413	1.75	0	10699064	10699413	2.34	0	suppressor of cytokine signaling 1	12703	Cish1|Cish7|JAB|SOCS-1|SSI-1
4921513D23Rik	chr16	-	14072187	14072536	1.76	0	14072287	14072836	1.45	0	14072187	14072536	1.56	0.000702	RIKEN cDNA 4921513D23 gene	223989	BC031575|E030019O05|KIAA0430|LKAP|MGC36956|mKIAA0430
Nde1	chr16	+	14072187	14072536	1.76	0	14072287	14072836	1.45	0	14072187	14072536	1.56	0.000702	nuclear distribution gene E homolog 1 (A nidulans)	67203	2810027M15Rik|AU042936|AW822251|Nude|mNudE
0610037P05Rik	chr16	-	14230660	14231009	0.95	0.00939	14230660	14231009	0.95	0.000944	14230660	14231009	1.56	0.000702	RIKEN cDNA 0610037P05 gene	66086	-
Pik4ca	chr16	-	17322577	17322926	1.69	0.000194	17322677	17323031	0.97	0.000645	17322677	17323031	1.69	0.000313	phosphatidylinositol 4-kinase, catalytic, alpha polypeptide	224020	-
Slc25a1	chr16	-	17841979	17842328	1.05	0.00445	17842079	17842428	1.02	0.000585	17841979	17842328	2.01	0	solute carrier family 25 (mitochondrial carrier, citrate transporter), member 1	13358	1300019P08Rik|2610100G11Rik|AI194714|Ctp|Dgsj|MGC47055|Slc20a3
Igl-V1	chr16	-	19001410	19002068	1.35	0	19001410	19001759	0.77	0.00533	19001410	19001759	1.33	0.00475	immunoglobulin lambda chain, variable 1	16142	1810027O01Rik|IgL|immunoglobulin lambda-chain
Eif4a2	chr16	+	23022545	23023094	1.52	0	23022545	23023094	0.85	0	23022645	23023094	1.56	0.000702	eukaryotic translation initiation factor 4A2	13682	4833432N07Rik|BM-010|Ddx2b|Eif4
Rtp4	chr16	+	23525026	23525375	1.59	0.000317	23525026	23525375	0.75	0.00668	23525026	23525375	1.69	0.000313	receptor transporter protein 4	67775	5830458K16Rik|Ifrg28
Lsg1	chr16	-	30507386	30508036	1.72	0	30507386	30507835	0.97	0.000645	30507386	30508036	1.56	0.00202	large subunit GTPase 1 homolog (S. cerevisiae)	224092	5830465I20|AA409273|D16Bwg1547e
Parp14	chr16	-	35790779	35792328	1.89	0	35790779	35791428	1.17	0.000208	35790779	35792028	1.28	0	poly (ADP-ribose) polymerase family, member 14	547253	1600029O10Rik|BC021340|CoaSt6|KIAA1268|MGC29390|mKIAA1268
Dtx3l	chr16	-	35858578	35858927	2.74	0	35858578	35858927	2	0	35858578	35859036	2.89	0	deltex 3-like (Drosophila)	209200	AU042200|BC023741|MGC103262
Parp9	chr16	+	35858578	35858927	2.74	0	35858578	35858927	2	0	35858578	35859036	2.89	0	poly (ADP-ribose) polymerase family, member 9	80285	AW214463|BC003281|Bagl|Bal|MGC7868
2010005H15Rik	chr16	+	36140856	36141205	2.03	0	36140856	36141205	1.67	0	36140856	36141310	2.01	0	RIKEN cDNA 2010005H15 gene	76770	-
4930455C21Rik	chr16	-	38441978	38442327	1.72	0	38441978	38442430	1.47	0	38442078	38442534	1.92	0	RIKEN cDNA 4930455C21 gene	76916	2810021C21Rik|AV135763
Qtrtd1	chr16	-	43808326	43809375	0.95	0.00316	43809026	43809375	0.85	0.00252	43808926	43809375	1.42	0.00213	queuine tRNA-ribosyltransferase domain containing 1	106248	3110012M05Rik|4930470H18Rik|AI648807|MGC102598
2610015P09Rik	chr16	+	43808326	43809375	0.95	0.00316	43809026	43809375	0.85	0.00252	43808926	43809375	1.42	0.00213	RIKEN cDNA 2610015P09 gene	212153	8430422M09Rik|AU040712
LOC668013	chr16	+	56640407	56640868	1.39	0	56640507	56640868	0.97	0.000645	56640307	56640960	1.33	0.00439	hypothetical protein LOC668013	668013	-
D16Ertd472e	chr16	-	78459789	78460138	1.72	0	78459589	78460138	1.1	0	78459589	78460138	1.6	0.00239	DNA segment, Chr 16, ERATO Doi 472, expressed	67102	1700010I10Rik|2310009O17Rik|AI256766|AW536354|E330003K22Rik
Mx2	chr16	+	97689773	97690222	1.66	0.000176	97689773	97690222	1.45	0	97689773	97690222	1.42	0.00213	myxovirus (influenza virus) resistance 2	17858	AI528743|Mx-2
Mx2	chr16	+	97690673	97691022	2.13	0	97690773	97691129	1.45	0	97690773	97691222	1.6	0.000263	myxovirus (influenza virus) resistance 2	17858	AI528743|Mx-2
LOC245305	chr16	+	98151649	98151998	1.66	0.000176	98151649	98151998	1.07	0.000167	98151649	98151998	1.65	0.000291	similar to hypothetical protein FLJ38281	245305	-
Vil2	chr17	-	6631840	6632689	1.44	0.000639	6632340	6632689	0.99	0.000944	6631840	6632789	1.3	0.00635	villin 2	22350	AW146364|MGC107499|R75297|p81
Tagap	chr17	+	7763970	7764324	1.76	0.000194	7763843	7764219	1.25	0.000219	7763843	7764219	1.39	0.00366	T-cell activation Rho GTPase-activating protein	72536	2610315E15Rik|MGC31468
BC002059	chr17	+	16655543	16655992	2.04	0	16655543	16656092	1.3	0.000239	16655643	16656092	1.34	0.00475	cDNA sequence BC002059	213811	MGC6110
BC018101	chr17	+	16825382	16825831	2.07	0	16825482	16826031	1.25	0.000219	16825482	16826031	1.25	0.00991	cDNA sequence BC018101	449000	-
Zfp97	chr17	+	16825382	16825831	2.07	0	16825482	16826031	1.25	0.000219	16825482	16826031	1.25	0.00991	zinc finger protein 97	22759	NGD16-4
LOC626854	chr17	+	16998414	16999063	2.04	0	16998414	16999063	1.38	0	16998514	16999063	1.44	0.00213	similar to zinc finger protein 709	626854	-
MGC107415	chr17	-	21666607	21667456	1.69	0.000333	21666507	21667356	1.4	0	21666507	21667456	2.64	0	hypothetical protein LOC383216	383216	-
4930432O21Rik	chr17	+	21666607	21667456	1.69	0.000333	21666507	21667356	1.4	0	21666507	21667456	2.64	0	RIKEN cDNA 4930432O21 gene	74670	-
6330416L07Rik	chr17	-	22065246	22066295	2.56	0	22065446	22066295	1.95	0	22065446	22066295	2.64	0	RIKEN cDNA 6330416L07 gene	319615	MGC117948
BC021442	chr17	+	22065246	22066295	2.56	0	22065446	22066295	1.95	0	22065446	22066295	2.64	0	cDNA sequence BC021442	224598	MGC29357|MGC67807
A630033E08Rik	chr17	-	22571054	22571603	2.42	0	22571054	22571514	2.18	0	22571054	22571603	1.76	0.000342	RIKEN cDNA A630033E08 gene	240041	C730040L01Rik
Zfp40	chr17	-	22922526	22922887	2.07	0	22922526	22922887	1.43	0	22922526	22922887	1.58	0.000702	zinc finger protein 40	22700	CTfin12|Zfp-40
Kremen2	chr17	-	23476529	23476978	1.62	0.000437	23476729	23477178	1.12	0	23476629	23476978	1.3	0.00635	kringle containing transmembrane protein 2	73016	2900054E04Rik
9530082P21Rik	chr17	+	23476529	23476978	1.62	0.000437	23476729	23477178	1.12	0	23476629	23476978	1.3	0.00635	RIKEN cDNA 9530082P21 gene	638247	E030034P13Rik
Ube2i	chr17	-	25001300	25001649	1.51	0.000606	25001300	25001849	0.99	0	25001300	25002349	1.67	0.00277	ubiquitin-conjugating enzyme E2I	22196	5830467E05Rik|Mmubc9|UBC9|Ubce2i|Ubce9
Tmem8	chr17	+	25840393	25840642	2.63	0	25840393	25840642	2.28	0	25840393	25840642	1.48	0.00509	transmembrane protein 8 (five membrane-spanning domains)	60455	AW490096|M83
Fgd2	chr17	+	29090077	29090426	1.55	0.000512	29090077	29090426	0.78	0.00668	29090077	29090426	2.32	0	FYVE, RhoGEF and PH domain containing 2	26382	ZFYVE4
1110021J02Rik	chr17	-	29446479	29447029	1.72	0.000176	29446479	29447029	1.01	0.000645	29446479	29447229	1.71	0.000313	RIKEN cDNA 1110021J02 gene	68597	-
Tff1	chr17	-	30892184	30892533	2.42	0	30892184	30892635	1.53	0	30892084	30892433	1.99	0	trefoil factor 1	21784	Bcei|PS2
Rab11b	chr17	-	33367354	33367809	1.26	0.00138	33367054	33367809	0.54	0.0049	33367454	33367809	1.44	0.00213	RAB11B, member RAS oncogene family	19326	-
LOC630499	chr17	-	33589181	33589530	2.18	0	33589181	33589530	0.93	0.00186	33589281	33589730	1.39	0.00366	similar to H-2 class I histocompatibility antigen, D-K alpha chain precursor (H-2D(K))	630499	-
AA388235	chr17	+	33589181	33589530	2.18	0	33589181	33589530	0.93	0.00186	33589281	33589730	1.39	0.00366	expressed sequence AA388235	433100	-
H2-K1	chr17	-	33610796	33611145	2.21	0	33610796	33611145	1.4	0	33610796	33611145	2.27	0	histocompatibility 2, K1, K region	14972	H-2K|H-2K(d)|H2-K|MGC7052|MHC I
LOC56628	chr17	-	33610796	33611145	2.21	0	33610796	33611145	1.4	0	33610796	33611145	2.27	0	MHC (A.CA/J(H-2K-f) class I antigen	56628	-
H2-DMb1	chr17	+	33753341	33753790	1.62	0.000437	33753341	33753790	0.93	0.00186	33753541	33753890	1.81	0.000379	histocompatibility 2, class II, locus Mb1	14999	AI385589|H-2Mb1|H2-Mb1
H2-DMb2	chr17	+	33753341	33753790	1.62	0.000437	33753341	33753790	0.93	0.00186	33753541	33753890	1.81	0.000379	histocompatibility 2, class II, locus Mb2	15000	H-2Mb2|H2-Mb2
Psmb9	chr17	-	33796239	33797488	1.76	0.000194	33796539	33797488	1.27	0.000229	33797139	33797488	1.34	0.00475	proteosome (prosome, macropain) subunit, beta type 9 (large multifunctional peptidase 2)	16912	Lmp-2|Lmp2
Tap1	chr17	+	33796239	33797488	1.76	0.000194	33796539	33797488	1.27	0.000229	33797139	33797488	1.34	0.00475	transporter 1, ATP-binding cassette, sub-family B (MDR/TAP)	21354	ABC17|APT1|Abcb2|Ham-1|Ham1|MTP1|PSF1|RING4|TAP|Tap-1|Y3
Psmb8	chr17	+	33808432	33808781	2.6	0	33807932	33808781	2.1	0	33808432	33808881	2.73	0	proteosome (prosome, macropain) subunit, beta type 8 (large multifunctional peptidase 7)	16913	Lmp-7|Lmp7
Tap2	chr17	+	33814634	33814983	1.55	0.000512	33814634	33814983	1.38	0	33814427	33814883	1.39	0.00366	transporter 2, ATP-binding cassette, sub-family B (MDR/TAP)	21355	ABC18|AI462429|APT2|Abcb3|Ham-2|Ham2|MTP2|PSF2|RING11|Tap-2|Y1|jas
H2-Ea	chr17	-	33955187	33955436	2.88	0	33955187	33955436	1.45	0	33955187	33955436	2.55	0	histocompatibility 2, class II antigen E alpha	14968	AI323765|E-alpha-f|H-2Ea|Ia-3|Ia3|MGC117888
D17H6S56E-5	chr17	-	34608444	34608893	1.33	0.00106	34607944	34608893	0.99	0.000944	34608244	34608893	1.3	0.00635	DNA segment, Chr 17, human D6S56E 5	110956	G7e
Vars2	chr17	+	34608444	34608893	1.33	0.00106	34607944	34608893	0.99	0.000944	34608244	34608893	1.3	0.00635	valyl-tRNA synthetase 2	22321	Bat-6|Bat6|D17H6S56E|G7a
Aif1	chr17	-	34781316	34781665	2.11	0	34781316	34781765	1.35	0	34781316	34781765	1.48	0.00164	allograft inflammatory factor 1	11629	AI607846|AIF-1|D17H6S50E|G1|Iba1
H2-D1	chr17	+	34870799	34871148	2.25	0	34870899	34871248	1.58	0	34870799	34871148	2.64	0	histocompatibility 2, D region locus 1	14964	H-2D|H2-D|MHC B7.2
H2-Q5	chr17	+	34870799	34871148	2.25	0	34870899	34871248	1.58	0	34870799	34871148	2.64	0	histocompatibility 2, Q region locus 5	15016	H-2Q5|Qa-5|Qa5|Qat-5
LOC547343	chr17	+	34870799	34871148	2.25	0	34870899	34871248	1.58	0	34870799	34871148	2.64	0	similar to H-2 class I histocompatibility antigen, L-D alpha chain precursor	547343	-
H2-Q1	chr17	+	34987419	34987768	2.18	0	34987419	34987768	1.63	0	34987419	34987768	2.13	0	histocompatibility 2, Q region locus 1	15006	H-2Q1|MGC91064|Q1b|Q1d|Q1k|Qa-1|Qa1|Qed-1
H2-Q8	chr17	+	35001743	35002192	2	0	35001743	35002192	1.25	0.000219	35001743	35002192	2.18	0	histocompatibility 2, Q region locus 8	15019	H-2Q8|MMS10-T|Ms10t|Qa-2|Qa-8|Qa8
H2-Q6	chr17	+	35032496	35032945	2.04	0	35032496	35032945	1.56	0	35032496	35032945	1.99	0	histocompatibility 2, Q region locus 6	110557	H-2Q6|Qa-6|Qa6
H2-Q7	chr17	+	35046941	35047290	2.6	0	35046941	35047290	1.82	0	35046941	35047290	2.46	0	histocompatibility 2, Q region locus 7	15018	H-2Q7|Ped|Q9|Qa-2|Qa-7|Qa7
H2-T17	chr17	-	35650763	35651112	2.88	0	35650763	35651112	2.34	0	35650763	35651112	2.78	0	histocompatibility 2, T region locus 17	15032	27b|H-2T17|T22b
H2-T22	chr17	-	35650763	35651112	2.88	0	35650763	35651112	2.34	0	35650763	35651112	2.78	0	histocompatibility 2, T region locus 22	15039	H-2T22
H2-T9	chr17	-	35650763	35651112	2.88	0	35650763	35651112	2.34	0	35650763	35651112	2.78	0	histocompatibility 2, T region locus 9	15051	H-2T9
LOC547347	chr17	+	35650763	35651112	2.88	0	35650763	35651112	2.34	0	35650763	35651112	2.78	0	hypothetical protein LOC547347	547347	-
H2-T10	chr17	-	35729613	35729962	1.93	0	35729613	35729962	1.43	0	35729513	35729862	2.59	0	histocompatibility 2, T region locus 10	15024	H-2T10
H2-T9	chr17	-	35729613	35729962	1.93	0	35729613	35729962	1.43	0	35729513	35729862	2.59	0	histocompatibility 2, T region locus 9	15051	H-2T9
Trim26	chr17	+	36444866	36445215	2.14	0	36444866	36445215	1.74	0	36444766	36445215	2.27	0	tripartite motif protein 26	22670	AI462198|Zfp173|Zfp1736
Ppp1r11	chr17	-	36559054	36560003	1.93	0	36558954	36559309	0.86	0.0037	36559054	36559803	1.71	0	protein phosphatase 1, regulatory (inhibitor) subunit 11	76497	1500041B02Rik|AV117883|HCG-V|HCGV|Tcte5|Tctex-5|Tctex5
Mog	chr17	-	36630802	36631151	1.69	0.000333	36630802	36631151	1.19	0.000198	36630802	36631451	1.62	0.00239	myelin oligodendrocyte glycoprotein	17441	-
H2-M3	chr17	+	36878145	36878996	2.42	0	36878045	36878996	1.71	0	36878045	36878996	2.59	0	histocompatibility 2, M region locus 3	14991	H-2M3|Hmt|M3a
Hsp90ab1	chr17	-	45037286	45037972	1.3	0	45037486	45037972	1.38	0	45037486	45037972	1.76	0.000342	heat shock protein 90kDa alpha (cytosolic), class B member 1	15516	90kDa|AL022974|C81438|Hsp84|Hsp84-1|Hsp90|Hspcb|MGC115780
Zfp119	chr17	-	55472138	55472487	1.62	0.000437	55472038	55472487	1.17	0.000188	55472038	55472487	1.44	0.00213	zinc finger protein 119	104349	AL024077|Mzf13
BC011426	chr17	+	55484973	55485422	1.55	0.000512	55484973	55485422	1.09	0.000315	55484973	55485422	1.3	0.00635	cDNA sequence BC011426	224893	MGC18740
BC031441	chr17	-	55538502	55538951	1.69	0.000333	55538502	55538951	1.09	0.000315	55538502	55538951	1.44	0.00213	cDNA sequence BC031441	240120	MGC18735
ORF19	chr17	+	66011144	66011893	1.76	0	66011144	66011893	1.71	0	66010844	66011293	1.34	0.00475	open reading frame 19	68767	1110049F14Rik
ORF19	chr17	+	66011144	66011893	1.76	0	66011144	66011893	1.71	0	66011444	66011798	2.41	0	open reading frame 19	68767	1110049F14Rik
Ypel5	chr17	+	72742753	72743309	1.3	0.00115	72742853	72743309	1.09	0.000315	72742853	72743309	1.53	0.000877	yippee-like 5 (Drosophila)	383295	2310076K21Rik|CGI-127
Ltbp1	chr17	+	75082891	75083640	1.23	0.0022	75082991	75083640	0.78	0.00668	75082691	75083240	1.44	0.00213	latent transforming growth factor beta binding protein 1	268977	9430031G15Rik|9830146M04|LTBP-1S|Ltbp-1|Tgfb
Prepl	chr17	-	85000166	85000523	3.06	0	85000166	85000523	2.21	0	85000166	85000523	2.55	0	prolyl endopeptidase-like	213760	2810457N15Rik|9530014L06Rik|D030028O16Rik|MGC7980|mKIAA0436
Mettl4	chr17	-	95053651	95054200	0.88	0.00732	95053651	95054000	1.06	0.000585	95053451	95054000	1.3	0.00635	methyltransferase like 4	76781	2410198H06Rik|A730091E08Rik|AV296509|HsT661
Crem	chr18	-	3280960	3281217	1.57	0.00215	3280960	3281217	1	0.00132	3280960	3281217	2.16	0	cAMP responsive element modulator	12916	ICER
Crem	chr18	-	3337363	3338348	1.71	0.000194	3337763	3338348	0.78	0.00533	3337963	3338348	1.93	0	cAMP responsive element modulator	12916	ICER
Cabyr	chr18	+	12881573	12881926	2.39	0	12881573	12881926	1.68	0	12881573	12882422	2.16	0	calcium-binding tyrosine-(Y)-phosphorylation regulated (fibrousheathin 2)	71132	1700016C01Rik|4933421A18Rik|CBP86|FSP-2|MGC130217|MGC130218
Klhl14	chr18	-	21797224	21798375	1.13	0	21797224	21798473	0.58	0.00385	21797224	21797773	1.47	0.00164	kelch-like 14 (Drosophila)	225266	6330403N15Rik|AI785250
Pcdhgb4	chr18	+	37940402	37941151	0.79	0.00462	37940502	37940859	1.03	0.000585	37940402	37940759	1.66	0.000291	protocadherin gamma subfamily B, 4	93701	-
Pcdhgc4	chr18	+	37940402	37941151	0.79	0.00462	37940502	37940859	1.03	0.000585	37940402	37940759	1.66	0.000291	protocadherin gamma subfamily C, 4	93707	-
Pcdhgc5	chr18	+	37940402	37941151	0.79	0.00462	37940502	37940859	1.03	0.000585	37940402	37940759	1.66	0.000291	protocadherin gamma subfamily C, 5	93708	-
Ticam2	chr18	-	46699213	46699562	2.49	0	46699213	46699562	1.43	0	46699213	46699562	2.21	0	toll-like receptor adaptor molecule 2	225471	B430113A10|MGC107370|TICAM-2|TRAM|Tirp|Trif
Ticam2	chr18	-	46701313	46702270	2.36	0	46701313	46701673	1.68	0	46701313	46701673	1.98	0	toll-like receptor adaptor molecule 2	225471	B430113A10|MGC107370|TICAM-2|TRAM|Tirp|Trif
Tmed7	chr18	-	46724110	46724469	1.95	0	46723910	46724469	1.08	0	46724010	46724469	2.16	0	transmembrane emp24 protein transport domain containing 7	66676	3930401E15Rik|5830493P14Rik|AU044611|AW545765|TRAM
AU016693	chr18	-	53870166	53870619	1.57	0.000437	53870166	53870619	1.41	0	53870366	53870720	1.56	0.000702	expressed sequence AU016693	225523	A230075C01
Zfp608	chr18	-	55025506	55025860	2.32	0	55025406	55025860	1.33	0	55025706	55026155	1.56	0.000702	zinc finger protein 608	269023	4932417D18Rik|MGC116601
Gramd3	chr18	+	56591585	56591934	2.87	0	56591485	56591835	1.93	0	56591585	56591934	2.16	0	GRAM domain containing 3	107022	9030613F08Rik|9130427A09Rik|AW061306|NS3TP2
Rps14	chr18	+	60899681	60900030	1.06	0.00445	60899681	60900130	1.08	0.000167	60899781	60900130	1.29	0.00635	ribosomal protein S14	20044	2600014J02Rik|AL023078|MGC86125
Cd74	chr18	+	60928892	60929341	1.26	0.00115	60928392	60929441	0.83	0.000642	60928692	60929141	1.33	0.00475	CD74 antigen (invariant polypeptide of major histocompatibility complex, class II antigen-associated)	16149	CLIP|DHLAG|HLADG|Ia-GAMMA|Ii
Tcof1	chr18	-	60974827	60975176	2.63	0	60974827	60975176	1.51	0	60974727	60975080	1.52	0.000877	Treacher Collins Franceschetti syndrome 1, homolog	21453	AA408847|AW209012|treacle
Csnk1a1	chr18	+	61680081	61680430	1.2	0.0022	61680081	61680530	0.85	0.00252	61680081	61680430	1.29	0.00635	casein kinase 1, alpha 1	93687	2610208K14Rik|4632404G05Rik|5430427P18Rik|Csnk1a|MGC29354|MGC30571
D18Ertd653e	chr18	+	68352312	68352661	2.12	0	68352312	68353461	1.23	0	68352312	68352661	1.75	0.000342	DNA segment, Chr 18, ERATO Doi 653, expressed	52662	8230401C20Rik|A430083H02|A430108L08Rik|C18orf1|D330030L18Rik
Rkhd2	chr18	+	73695306	73695665	2.39	0	73695306	73695665	2.03	0	73695306	73695665	2.16	0	ring finger and KH domain containing 2	240396	BC035207|BM-013
Txndc10	chr18	+	90643609	90644158	1.91	0	90643609	90643965	1.38	0	90643609	90644058	1.84	0	thioredoxin domain containing 10	67988	6430411B10Rik|A730024F05Rik|AV259382|mKIAA1830
Aldh3b1	chr19	-	3929066	3929415	1.95	0	3929166	3929515	1.35	0	3929066	3929415	2.02	0	aldehyde dehydrogenase 3 family, member B1	67689	1700001N19Rik|ALDH4|ALDH7
Rad9	chr19	-	4201192	4201741	1.25	0	4201392	4201741	0.91	0.00186	4201392	4201741	1.69	0.000291	RAD9 homolog (S. pombe)	19367	-
Pold4	chr19	+	4231486	4231935	1.53	0	4231586	4231935	1.12	0.000176	4231586	4231935	1.69	0.000291	polymerase (DNA-directed), delta 4	69745	2410012M21Rik|AI463381|AW060307|POLDS|p12
AW125688	chr19	-	5088241	5088590	1.29	0.00115	5088041	5088490	0.91	0.00186	5087941	5088290	1.6	0.000702	expressed sequence AW125688	381199	Gm961
Yif1a	chr19	+	5088241	5088590	1.29	0.00115	5088041	5088490	0.91	0.00186	5087941	5088290	1.6	0.000702	Yip1 interacting factor homolog A (S. cerevisiae)	68090	5330422J23Rik|54TM|Yif1|Yif1p
LOC666300	chr19	-	6045958	6046307	2.72	0	6045958	6046307	1.9	0	6045858	6046207	2.54	0	similar to thymosin, beta 10	666300	-
Syvn1	chr19	+	6045958	6046307	2.72	0	6045958	6046307	1.9	0	6045858	6046207	2.54	0	synovial apoptosis inhibitor 1, synoviolin	74126	1200010C09Rik|AW211966|C85322|D530017H19Rik|Hrd1
Ehd1	chr19	+	6275845	6276194	2.19	0	6275845	6276194	1.27	0.000239	6275945	6276294	2.12	0	EH-domain containing 1	13660	AA409636|Past1|RME-1
Sf1	chr19	+	6362892	6364141	0.87	0.00372	6362792	6363741	0.63	0.00251	6362792	6363641	1.32	0	splicing factor 1	22668	BB094781|CW17R|MZFM|WBP4|Zfp162
Slc15a3	chr19	+	10909338	10909687	2.16	0	10909338	10909787	1.45	0	10909338	10909687	2.59	0	solute carrier family 15, member 3	65221	Ci1|cI-1
AW112010	chr19	-	11117315	11117664	2.26	0	11117315	11117664	1.5	0	11117315	11117664	2.45	0	expressed sequence AW112010	107350	-
Ms4a1	chr19	-	11333227	11333576	2.4	0	11333127	11333476	1.35	0	11333227	11333576	2.3	0	membrane-spanning 4-domains, subfamily A, member 1	12482	AA960661|Cd20|Ly-44|Ms4a2
Zfp91	chr19	-	12862786	12864035	1.95	0	12863086	12864035	0.99	0.000645	12863086	12864035	1.93	0	zinc finger protein 91	109910	9130014I08Rik|A530054C17Rik|AL024263|AW545902|Pzf
Lpxn	chr19	+	12862786	12864035	1.95	0	12863086	12864035	0.99	0.000645	12863086	12864035	1.93	0	leupaxin	107321	4933402K05Rik|A530083L21Rik|AV278559|LDPL
Zfp91	chr19	-	12865586	12865935	1.22	0.0022	12865586	12866236	0.63	0.00893	12865486	12865843	1.46	0.00213	zinc finger protein 91	109910	9130014I08Rik|A530054C17Rik|AL024263|AW545902|Pzf
Lpxn	chr19	+	12865586	12865935	1.22	0.0022	12865586	12866236	0.63	0.00893	12865486	12865843	1.46	0.00213	leupaxin	107321	4933402K05Rik|A530083L21Rik|AV278559|LDPL
Olfr1494	chr19	+	13815377	13815740	1.98	0	13815377	13815740	1.12	0.000176	13815377	13815740	1.5	0.00164	olfactory receptor 1494	258992	MGC123672|MGC123731|MGC123732|MOR266-1
Rorb	chr19	-	19179234	19179594	2.96	0	19179234	19179594	2.28	0	19179234	19179594	1.69	0.000291	RAR-related orphan receptor beta	225998	MGC38728|Nr1f2|RZR-beta|RZRB
Cd274	chr19	+	29432877	29433335	2.54	0	29433077	29433426	2.06	0	29432677	29433426	2.45	0	CD274 antigen	60533	B7-H1|PD-L1|Pdcd1l1|Pdcd1lg1
Cstf2t	chr19	+	31148667	31149016	1.36	0.00112	31148667	31149016	0.96	0.000944	31148567	31149016	1.36	0.00475	cleavage stimulation factor, 3' pre-RNA subunit 2, tau	83410	64kDa|C77975|tCstF-64
Atad1	chr19	-	32778630	32778979	2.33	0	32778630	32778979	2.11	0	32778630	32778979	2.02	0	ATPase family, AAA domain containing 1	67979	4921525H23Rik|AW107648
2010002M12Rik	chr19	-	34706565	34707014	2.23	0	34706665	34707014	1.73	0	34706565	34706914	2.3	0	RIKEN cDNA 2010002M12 gene	112419	AW412491
Ifit1	chr19	+	34706565	34707014	2.23	0	34706665	34707014	1.73	0	34706565	34706914	2.3	0	interferon-induced protein with tetratricopeptide repeats 1	15957	Ifi56
Pcgf5	chr19	+	36443706	36444063	2.3	0	36443706	36444455	1.09	0.000167	36443606	36443962	1.6	0.000702	polycomb group ring finger 5	76073	0610009F02Rik|1110054A01Rik|5830406C17Rik|5830443C21Rik|9530023M17Rik|AI324127
Ide	chr19	-	37398120	37398674	1.25	0	37398120	37398674	0.79	0.0015	37398020	37398572	1.41	0.00366	insulin degrading enzyme	15925	1300012G03Rik|4833415K22Rik|AA675336|AI507533
Blnk	chr19	-	41047522	41047874	1.85	0	41047522	41047874	0.99	0.000645	41047422	41047979	1.55	0.000877	B-cell linker	17060	BASH|Bca|Ly-57|Ly57|Lyw-57|SLP-65
Blnk	chr19	-	41048822	41049174	1.91	0	41048822	41049671	1.04	0	41048922	41049371	2.16	0	B-cell linker	17060	BASH|Bca|Ly-57|Ly57|Lyw-57|SLP-65
Cox15	chr19	-	43805829	43806682	1.39	0	43805829	43806178	1.27	0.000239	43805829	43806178	1.41	0.00366	COX15 homolog, cytochrome c oxidase assembly protein (yeast)	226139	2900026G05Rik|MGC18952
Cutc	chr19	+	43805829	43806682	1.39	0	43805829	43806178	1.27	0.000239	43805829	43806178	1.41	0.00366	cutC copper transporter homolog (E.coli)	66388	2310039I18Rik|AI326282|CGI-32
Scd4	chr19	+	44386934	44387283	1.32	0.00106	44386934	44387283	0.74	0.00824	44386934	44387283	1.93	0	stearoyl-coenzyme A desaturase 4	329065	ACOD4|MGC48154
Pdcd11	chr19	-	47186419	47186768	1.36	0.00112	47186219	47186768	0.76	0.00223	47186319	47186768	1.32	0.00635	programmed cell death protein 11	18572	1110021I22Rik|ALG-4|Pdcd7|mKIAA0185
BC063749	chr19	-	47972842	47973191	1.43	0.000639	47972842	47973191	1.04	0.000585	47972942	47973391	1.32	0.00635	cDNA sequence BC063749	414801	KIAA1754|mKIAA1754
D19Ertd652e	chr19	-	47972842	47973191	1.43	0.000639	47972842	47973191	1.04	0.000585	47972942	47973391	1.32	0.00635	DNA segment, Chr 19, ERATO Doi 652, expressed	70806	4632415N18Rik|4930428C11Rik|4930463G05Rik|AI429486
Acsl5	chr19	+	55306868	55307217	1.95	0	55306868	55307217	1.19	0.000208	55306868	55307217	1.32	0.00635	acyl-CoA synthetase long-chain family member 5	433256	1700030F05Rik|ACS2|ACS5|Facl5
6430537H07Rik	chr19	+	58996025	58996374	1.39	0.000787	58995825	58996274	0.79	0.00533	58996025	58996474	1.83	0.000379	RIKEN cDNA 6430537H07 gene	226265	MGC30738
Gprk5	chr19	+	60943606	60943955	1.57	0.000414	60943506	60944655	1.12	0.000176	60943706	60944055	1.69	0.000291	G protein-coupled receptor kinase 5	14773	GRK5
Meig1	chr2	-	3340671	3341120	2.47	0	3340671	3341220	2	0	3340671	3341120	2.11	0	meiosis expressed gene 1	104362	Meg1
Dclre1c	chr2	+	3340671	3341120	2.47	0	3340671	3341220	2	0	3340671	3341120	2.11	0	DNA cross-link repair 1C, PSO2 homolog (S. cerevisiae)	227525	9930121L06Rik|AI661365|Artemis|MGC123409|Snm1l
Suv39h2	chr2	-	3392982	3393331	1.57	0	3392882	3393331	1.29	0	3392782	3393331	1.53	0.00183	suppressor of variegation 3-9 homolog 2 (Drosophila)	64707	4930507K23Rik|AA536750|D030054H19Rik|D2Ertd544e
Usp6nl	chr2	+	6237456	6237805	1.67	0	6237456	6237805	0.89	0.00174	6237456	6237805	1.82	0	USP6 N-terminal like	98910	AI316785|RNTRE|TRE2NL|mKIAA0019
Cugbp2	chr2	-	6640977	6641426	1.98	0	6640977	6641627	1.02	0	6640977	6641326	1.57	0.00184	CUG triplet repeat, RNA binding protein 2	14007	B230345P09Rik|C88023|ETR-3|Napor|Napor-2
2810030E01Rik	chr2	-	17968375	17968728	1.48	0	17968375	17968728	1.66	0	17968375	17969033	1.74	0	RIKEN cDNA 2810030E01 gene	72668	BB088113|MGC59463
Mllt10	chr2	+	17968375	17968728	1.48	0	17968375	17968728	1.66	0	17968375	17969033	1.74	0	myeloid/lymphoid or mixed lineage-leukemia translocation to 10 homolog (Drosophila)	17354	Af10|B130021D15Rik|D630001B22Rik|KIAA4140|mKIAA4140
Psd4	chr2	+	24206855	24207204	1.94	0	24206855	24207204	1.42	0	24206855	24207204	1.36	0.00458	pleckstrin and Sec7 domain containing 4	215632	BC046518
Notch1	chr2	-	26324896	26325145	2.53	0	26324896	26325145	2	0	26324896	26325145	2.77	0	Notch gene homolog 1 (Drosophila)	18128	9930111A19Rik|Mis6|Tan1|lin-12
Rexo4	chr2	-	26785971	26787020	0.52	0.00585	26786171	26786832	0.81	0.00369	26786171	26786832	1.45	0.00279	REX4, RNA exonuclease 4 homolog (S. cerevisiae)	227656	Gm111|Xpmc2h
Slc2a6	chr2	-	26850549	26850898	1.39	0	26850549	26850898	0.95	0.000687	26850449	26850800	2.27	0	solute carrier family 2 (facilitated glucose transporter), member 6	227659	A330096C23|F630103L12Rik|Glut6|Glut9
Gtf3c5	chr2	-	28404548	28405097	1.14	0.000301	28404548	28405097	0.87	0.00226	28404648	28405097	1.45	0.00279	general transcription factor IIIC, polypeptide 5	70239	2700084A09Rik|TFIIIC63|TFiiiC2-63
Ass1	chr2	+	31294766	31295115	1.76	0	31294766	31295115	0.87	0.00226	31294766	31295115	1.4	0.00307	argininosuccinate synthetase 1	11898	AA408052|ASS|Ass-1|MGC103151
Traf1	chr2	-	34785473	34785822	1.3	0	34785073	34786022	1.37	0	34785073	34786022	1.2	0.00877	Tnf receptor-associated factor 1	22029	4732496E14Rik
Kynu	chr2	+	43377587	43377936	2.22	0	43377287	43378043	1.79	0	43377687	43378043	2.56	0	kynureninase (L-kynurenine hydrolase)	70789	4432411A05Rik
LOC433424	chr2	+	44932318	44932670	1.64	0	44932218	44932567	1.24	0	44932318	44932670	1.49	0.00241	similar to hypothetical protein	433424	-
Zfhx1b	chr2	-	44934020	44934373	1.57	0	44934020	44934373	1.5	0	44934020	44934769	1.98	0	zinc finger homeobox 1b	24136	9130203F04Rik|SIP1|Zfx1b|Zfxh1b|mKIAA0569
LOC433424	chr2	+	44934020	44934373	1.57	0	44934020	44934373	1.5	0	44934020	44934769	1.98	0	similar to hypothetical protein	433424	-
0610033I05Rik	chr2	-	51756746	51757195	2.28	0	51756746	51757195	1.92	0	51756846	51757195	1.94	0	RIKEN cDNA 0610033I05 gene	71684	-
Nmi	chr2	-	51794862	51795211	2.04	0	51794862	51795211	2.05	0	51794962	51795418	2.15	0	N-myc (and STAT) interactor	64685	-
Pscdbp	chr2	-	57976298	57976657	2.25	0	57976298	57976657	1.58	0	57976298	57976657	2.19	0	pleckstrin homology, Sec7 and coiled-coil domains, binding protein	227929	A130053M09Rik|C80816|CYTIP|Cbp|tamalin
Baz2b	chr2	-	59926129	59926582	2.25	0	59926129	59926582	0.79	0.00533	59926129	59926582	1.61	0.00127	bromodomain adjacent to zinc finger domain, 2B	407823	5830435C13Rik|BC053917|D2Ertd794e
Ifih1	chr2	-	62446942	62447292	2.13	0	62446842	62447191	1.94	0	62446942	62447899	2.89	0	interferon induced with helicase C domain 1	71586	9130009C22Rik|Helicard|Hlcd|MDA-5|MDA5|MGC90959
Dnajc10	chr2	+	80115815	80116164	1.54	0	80115815	80116264	1.08	0.000189	80115215	80116164	1.78	0	DnaJ (Hsp40) homolog, subfamily C, member 10	66861	1200006L06Rik|D2Ertd706e|ERdj5|JPDI
Olfr1052	chr2	+	86097393	86097944	1.42	0	86097093	86097944	1.05	0.000177	86096993	86097657	1.36	0	olfactory receptor 1052	259012	MOR172-1
Ptprj	chr2	-	90384357	90384606	1.17	0.00461	90384357	90384606	1.21	0.0015	90384357	90384606	2.23	0	protein tyrosine phosphatase, receptor type, J	19271	AI450271|BET|Byp|CD148|DEP-1|PTPbeta2|Ptpb2|Scc-1|Scc1
Madd	chr2	-	90983937	90984286	1.23	0	90983937	90984286	0.97	0.000595	90983937	90984286	1.53	0.00183	MAP-kinase activating death domain	228355	9630059K23Rik|IG20
Tmem87a	chr2	-	120095871	120096220	2.78	0	120095871	120096220	1.92	0	120095971	120096325	2.31	0	transmembrane protein 87A	211499	A930025J12Rik
Ganc	chr2	+	120095871	120096220	2.78	0	120095871	120096220	1.92	0	120095971	120096325	2.31	0	glucosidase, alpha%3B neutral C	76051	5830445O15Rik|9330160A12|FLJ00088|mFLJ00088
Ell3	chr2	-	121134192	121134541	1.82	0	121134292	121134641	1.52	0	121134292	121134741	1.61	0.00127	elongation factor RNA polymerase II-like 3	269344	A930015D22Rik|MGC31450
B2m	chr2	+	121838877	121839226	2.04	0	121838877	121839226	1.39	0	121838777	121839126	2.48	0	beta-2 microglobulin	12010	Ly-m11|beta2-m
Dtwd1	chr2	+	125843367	125843816	1.51	0	125843267	125844127	0.81	0.00405	125842867	125844324	1.12	0.0039	DTW domain containing 1	69185	1810033A06Rik
Astl	chr2	+	127024749	127025798	1.82	0	127024749	127025798	1	0	127025349	127025698	1.65	0.000563	astacin-like metalloendopeptidase (M12 family)	215095	7420700F21|C87576|MGC76457|Ovastacin
Dusp2	chr2	+	127024749	127025798	1.82	0	127024749	127025798	1	0	127025349	127025698	1.65	0.000563	dual specificity phosphatase 2	13537	PAC1
Astl	chr2	+	127026549	127026998	1.33	0	127026549	127026998	1.31	0	127026549	127026998	1.53	0.00183	astacin-like metalloendopeptidase (M12 family)	215095	7420700F21|C87576|MGC76457|Ovastacin
Dusp2	chr2	+	127026549	127026998	1.33	0	127026549	127026998	1.31	0	127026549	127026998	1.53	0.00183	dual specificity phosphatase 2	13537	PAC1
1110034G24Rik	chr2	+	132380022	132380371	1.61	0	132380022	132380471	0.84	0.00306	132380022	132380575	1.28	0.00336	RIKEN cDNA 1110034G24 gene	73747	MGC118301
Rbbp9	chr2	-	144245394	144245752	1.76	0	144245394	144245752	1.87	0	144245394	144245752	1.86	0	retinoblastoma binding protein 9	26450	Bog
Sec23b	chr2	+	144245394	144245752	1.76	0	144245394	144245752	1.87	0	144245394	144245752	1.86	0	SEC23B (S. cerevisiae)	27054	-
AL033326	chr2	-	152023326	152024175	1.36	0	152023326	152024175	1.1	0.000204	152023326	152024175	1.32	0.00263	expressed sequence AL033326	24105	UIP28|Ubce7ip3
2500004C02Rik	chr2	-	153036542	153037191	1.85	0	153036542	153037191	1.37	0	153036042	153037191	1.4	0	RIKEN cDNA 2500004C02 gene	72326	-
Asxl1	chr2	+	153036542	153037191	1.85	0	153036542	153037191	1.37	0	153036042	153037191	1.4	0	additional sex combs like 1 (Drosophila)	228790	DKFZp434N0535|mKIAA0978
Wfdc5	chr2	-	163874332	163874688	2.78	0	163874332	163874688	2	0	163874432	163874881	1.57	0.00184	WAP four-disulfide core domain 5	209232	BC019734|PRG5|WAP1
LOC433501	chr2	+	164213059	164213408	2.01	0	164212959	164213308	1.42	0	164212959	164213308	2.07	0	similar to RIKEN cDNA 5330426L24	433501	-
Zswim1	chr2	+	164514046	164514395	2.1	0	164514046	164514395	1.94	0	164513946	164514295	2.07	0	zinc finger, SWIM domain containing 1	71971	2410003H12Rik|AI850991|BB046916
Cd40	chr2	+	164746290	164746639	1.73	0	164746290	164746639	1.05	0.000177	164746290	164746639	2.02	0	CD40 antigen	21939	AI326936|Bp50|GP39|HIGM1|IGM|IMD3|T-BAM|TRAP|Tnfrsf5|p50
Slc9a8	chr2	+	167112811	167113260	1.42	0	167112811	167113360	1	0	167112811	167113160	1.61	0.00127	solute carrier family 9 (sodium/hydrogen exchanger), member 8	77031	1200006P13Rik|6430709P13Rik|AI182282|NHE8
Ube2v1	chr2	-	167323326	167324084	1.88	0	167323326	167323676	1.29	0	167323426	167324084	1.2	0.00877	ubiquitin-conjugating enzyme E2 variant 1	66589	0610011J09Rik|AI256840|CROC1|D7Bwg1382e
F730031O20Rik	chr2	+	172085192	172085541	1.7	0	172084792	172085541	1.37	0	172085092	172085541	1.53	0.00183	RIKEN cDNA F730031O20 gene	320664	-
Zbp1	chr2	-	172861879	172862828	2.5	0	172861779	172862233	2	0	172861879	172862233	2.4	0	Z-DNA binding protein 1	58203	2010010H03Rik|Dlm1|mZaDLM
Tnfsf10	chr3	+	27507802	27508251	1.27	0	27508002	27508460	0.95	0.0014	27508002	27508559	1.46	0	tumor necrosis factor (ligand) superfamily, member 10	22035	A330042I21Rik|AI448571|APO-2L|Ly81|TL2|Trail
Skil	chr3	+	31284488	31284837	1.72	0	31284488	31284837	1.05	0.000498	31284388	31284742	1.67	0.00127	SKI-like	20482	9130011J04Rik|Skir|SnoN|SnoN2|sno|sno-dE3
Acad9	chr3	+	36256162	36256511	2.01	0	36256162	36256511	1.32	0	36256162	36256511	2.23	0	acyl-Coenzyme A dehydrogenase family, member 9	229211	2600017P15Rik|4732402K02|C630012L17Rik|NPD002
Cetn4	chr3	-	37504897	37505247	2.48	0	37504897	37505247	1.78	0	37504897	37505247	2.14	0	centrin 4	207175	MGC107235
Cetn4	chr3	-	37505997	37506356	1.5	0	37505997	37506356	1.03	0.000621	37505997	37506356	1.63	0.00184	centrin 4	207175	MGC107235
Gm1805	chr3	+	37505997	37506356	1.5	0	37505997	37506356	1.03	0.000621	37505997	37506356	1.63	0.00184	gene model 1805, (NCBI)	241950	Gm407|Gm721|MGC102209
Gm410	chr3	-	57779816	57780170	2.87	0	57779816	57780170	1.92	0	57779816	57780170	3.43	0	gene model 410, (NCBI)	242037	-
P2ry12	chr3	-	59316678	59317027	1.94	0	59316578	59317027	1.22	0.000241	59316678	59317027	2.01	0	purinergic receptor P2Y, G-protein coupled 12	70839	2900079B22Rik|4921504D23Rik|P2Y12
Ctso	chr3	+	82018399	82018748	1.59	0	82018399	82018848	1.41	0	82018399	82018848	1.97	0	cathepsin O	229445	A330105D01Rik|A430056C07|AI118514
D930015E06Rik	chr3	-	84127825	84128377	1.62	0	84127825	84128377	1.3	0	84127825	84128874	1.24	0.00877	RIKEN cDNA D930015E06 gene	229473	mKIAA0922
Adar	chr3	+	89816460	89816809	1.46	0	89816460	89816909	0.89	0.00245	89816360	89816709	2.1	0	adenosine deaminase, RNA-specific	56417	AV242451|Adar1|mZaADAR
Jtb	chr3	+	90317110	90317459	1.46	0	90317110	90317559	0.95	0.0014	90317010	90317359	1.58	0.00183	jumping translocation breakpoint	23922	Gm622
Dennd4b	chr3	+	90350611	90350960	1.43	0	90350611	90350960	0.78	0.00693	90350611	90350960	1.33	0.00877	DENN/MADD domain containing 4B	229541	BC026996|mKIAA0476
2500003M10Rik	chr3	-	90595470	90595819	2.23	0	90595470	90595819	2.19	0	90595370	90595819	1.5	0.00279	RIKEN cDNA 2500003M10 gene	66511	C81330
S100a13	chr3	+	90595470	90595819	2.23	0	90595470	90595819	2.19	0	90595370	90595819	1.5	0.00279	S100 calcium binding protein A13	20196	-
S100a10	chr3	+	93637817	93638166	2.32	0	93637617	93638166	1.57	0	93637317	93638166	1.67	0.00127	S100 calcium binding protein A10 (calpactin)	20194	42C|AA409961|AL024248|CAL12|CLP11|Cal1l|p10|p11
Rfx5	chr3	+	95038823	95039672	1.18	0.000301	95039323	95039672	1	0.000595	95039123	95039572	1.58	0.00183	regulatory factor X, 5 (influences HLA class II expression)	53970	-
Arnt	chr3	+	95519459	95520008	1.15	0.000372	95519159	95519608	0.81	0.00533	95519059	95519608	1.58	0.00183	aryl hydrocarbon receptor nuclear translocator	11863	D3Ertd557e|Drnt|ESTM42|Hif1b|KIAA4051|W08714|mKIAA4051
Ctss	chr3	+	95612039	95612400	1.88	0	95612039	95612400	1.46	0	95612039	95612400	1.54	0.00241	cathepsin S	13040	-
Hist2h4	chr3	-	96348188	96348637	1.08	0.00104	96348188	96348637	1.03	0.000621	96348188	96349237	2.06	0	histone 2, H4	97122	H4|X04652
Hist2h4	chr3	-	96348788	96349237	1.75	0	96348788	96349237	1.65	0	96348188	96349237	2.06	0	histone 2, H4	97122	H4|X04652
Hist2h3b	chr3	+	96348788	96349237	1.75	0	96348788	96349237	1.65	0	96348188	96349237	2.06	0	histone 2, H3b	319154	H3-616
Hist2h3c1	chr3	+	96348788	96349237	1.75	0	96348788	96349237	1.65	0	96348188	96349237	2.06	0	histone 2, H3c1	15077	BE691662|H3-615|H3f2|Hist2h3ca1
LOC668527	chr3	-	97746474	97746823	1.97	0	97746474	97746823	1.41	0	97746574	97746923	1.8	0	hypothetical protein LOC668527	668527	-
Mov10	chr3	-	104946030	104946479	2.52	0	104946030	104946479	2.16	0	104946030	104946479	2.36	0	Moloney leukemia virus 10	17454	Mov-10
Chi3l4	chr3	-	106349670	106350022	1.5	0	106349670	106350022	1.3	0	106349670	106350022	1.71	0.000563	chitinase 3-like 4	104183	Ym2
Cd53	chr3	-	106918108	106918457	1.97	0	106918108	106918457	1.51	0	106918008	106918366	2.91	0	CD53 antigen	12508	AI323659|Ox-44|Tspan25
AI504432	chr3	+	107166228	107166580	2.61	0	107166228	107166580	2.24	0	107166228	107166580	2.87	0	expressed sequence AI504432	229694	A230102G19
Amy1	chr3	-	113566216	113566666	1.34	0	113566216	113566880	0.84	0.00376	113566016	113566765	1.11	0.00619	amylase 1, salivary	11722	Amy-1|C030014B17Rik
Bcar3	chr3	+	122411173	122411623	2.01	0	122411173	122411623	1.89	0	122411173	122411623	1.88	0	breast cancer anti-estrogen resistance 3	29815	AI131758|AND-34
Nfkb1	chr3	-	135545083	135545932	1.91	0	135545283	135545732	1.51	0	135545283	135545832	2.14	0	nuclear factor of kappa light chain gene enhancer in B-cells 1, p105	18033	NF-KB1|NF-kappaB|NF-kappaB1|p105|p50|p50/p105
Dapp1	chr3	-	137918663	137919116	1.46	0	137918663	137919116	1.16	0.00022	137918161	137919116	2.31	0	dual adaptor for phosphotyrosine and 3-phosphoinositides 1	26377	Bam32
Gbp1	chr3	+	142433935	142434284	1.78	0	142433935	142434284	1.32	0	142433935	142434284	2.31	0	guanylate nucleotide binding protein 1	14468	5830475C06|Gbp-1|MGC124334|Mag-1|Mpa-1|Mpa1
Gbp5	chr3	+	142433935	142434284	1.78	0	142433935	142434284	1.32	0	142433935	142434284	2.31	0	guanylate nucleotide binding protein 5	229898	5330409J06Rik
9830147J24Rik	chr3	+	142467479	142467828	2.8	0	142467479	142467828	2.43	0	142467379	142467828	2.83	0	RIKEN cDNA 9830147J24 gene	229900	-
Gbp4	chr3	+	142497790	142498239	1.97	0	142497790	142498139	2.03	0	142497790	142498139	2.66	0	guanylate nucleotide binding protein 4	55932	AW228655|Gbp3
Gbp2	chr3	+	142557777	142558126	2.52	0	142557777	142558126	2.14	0	142557777	142558126	3.17	0	guanylate nucleotide binding protein 2	14469	-
Rps20	chr4	-	3761984	3762433	1.55	0	3761984	3762433	1.52	0	3761984	3762433	1.57	0.00184	ribosomal protein S20	67427	4632426K06Rik|MGC102408
E130016E03Rik	chr4	+	11506258	11506607	1.11	0.000779	11505958	11506607	0.94	0.00181	11506258	11506607	1.57	0.00184	RIKEN cDNA E130016E03 gene	623474	Fsbp|MGC67261|Rad54b
Gem	chr4	+	11631880	11632331	1.08	0.00104	11631380	11632236	1.18	0.000241	11631880	11632236	1.36	0.00458	GTP binding protein (gene overexpressed in skeletal muscle)	14579	AV020497
Tmem67	chr4	-	12014363	12015338	1.36	0	12014363	12015338	1.05	0.000177	12014363	12014816	1.53	0.00183	transmembrane protein 67	329795	5330408M12Rik|B230117O07
C430048L16Rik	chr4	+	12014363	12015338	1.36	0	12014363	12015338	1.05	0.000177	12014363	12014816	1.53	0.00183	RIKEN cDNA C430048L16 gene	77604	AV299215|MGC91091
Casp8ap2	chr4	+	32943690	32944039	0.82	0.00859	32943690	32944139	0.92	0.0014	32943590	32943939	1.78	0	caspase 8 associated protein 2	26885	D4Ertd659e|FLASH|mKIAA1315
Ddx58	chr4	-	40428322	40428771	1.52	0	40428322	40428671	1.54	0	40428022	40428771	1.86	0	DEAD (Asp-Glu-Ala-Asp) box polypeptide 58	230073	6430573D20Rik|C330021E21|RIG-I
Aptx	chr4	-	40893137	40893492	1.33	0	40893137	40893492	1.41	0	40893037	40893492	1.28	0.00336	aprataxin	66408	2410016G21Rik|AA388047
LOC545618	chr4	-	44777556	44777905	1.62	0	44777456	44777905	1.41	0	44777456	44778305	1.53	0.00183	similar to aurora kinase C	545618	-
Zcchc7	chr4	+	44777556	44777905	1.62	0	44777456	44777905	1.41	0	44777456	44778305	1.53	0.00183	zinc finger, CCHC domain containing 7	319885	4930572I07Rik
LOC634450	chr4	+	46596493	46596950	1.36	0	46596593	46596950	0.92	0.0014	46596493	46596842	1.78	0	superantigen 3	634450	VSAG1|VSAG6
Fcmd	chr4	+	53732003	53732353	1.71	0	53732003	53732353	1.05	0.000177	53732003	53732353	2.19	0	Fukuyama type congenital muscular dystrophy homolog (human)	246179	D830030O17Rik|Fukutin
Hsdl2	chr4	+	59675007	59675356	1.36	0	59675007	59675356	1.13	0.00022	59674607	59675656	1.16	0.00925	hydroxysteroid dehydrogenase like 2	72479	2610207I16Rik
1110054O05Rik	chr4	-	59877259	59877608	2.63	0	59877259	59877508	2.3	0	59877259	59877508	3.01	0	RIKEN cDNA 1110054O05 gene	66209	2610312O17Rik|AA399876
Snx30	chr4	+	59898777	59899226	1.93	0	59898777	59899132	1.41	0	59898777	59899526	2.35	0	sorting nexin family member 30	209131	4732481H14Rik|C030041J06Rik|MGC106086
Mup1	chr4	-	60555700	60556056	2.41	0	60555700	60556056	1.41	0	60555600	60555958	1.86	0	major urinary protein 1	17840	2610016E04Rik|Ltn-1|Lvtn-1|Mup-1|Mup-a|Up-1
Mup1	chr4	-	61004978	61005337	2.12	0	61004978	61005337	1.33	0	61004978	61005337	1.69	0.000325	major urinary protein 1	17840	2610016E04Rik|Ltn-1|Lvtn-1|Mup-1|Mup-a|Up-1
Mup2	chr4	-	61004978	61005337	2.12	0	61004978	61005337	1.33	0	61004978	61005337	1.69	0.000325	major urinary protein 2	17841	AA589603|MGC117823|Mup-2
LOC621078	chr4	+	61004978	61005337	2.12	0	61004978	61005337	1.33	0	61004978	61005337	1.69	0.000325	hypothetical LOC621078	621078	-
Mup1	chr4	-	61081378	61081734	2.22	0	61081378	61081734	1.2	0	61081278	61081734	1.82	0	major urinary protein 1	17840	2610016E04Rik|Ltn-1|Lvtn-1|Mup-1|Mup-a|Up-1
Tlr4	chr4	+	66313842	66314191	2.47	0	66313842	66314191	1.6	0	66313842	66314191	2.35	0	toll-like receptor 4	21898	Lps|Ly87|Ran/M1|Rasl2-8
Inadl	chr4	+	97928929	97929278	1.62	0	97928929	97929278	1.07	0.000189	97929129	97929482	2.56	0	InaD-like (Drosophila)	12695	Cipp|Patj
Itgb3bp	chr4	-	99320965	99321414	1.52	0	99320865	99321414	1.33	0	99320865	99321614	1.57	0	integrin beta 3 binding protein (beta3-endonexin)	67733	4930471O16Rik
BC020077	chr4	+	99320965	99321414	1.52	0	99320865	99321414	1.33	0	99320865	99321614	1.57	0	cDNA sequence BC020077	230500	MGC118010|MGC28352|mKIAA1799
4921539E11Rik	chr4	-	102788196	102788645	0.92	0.0043	102788396	102788752	0.89	0.00174	102788396	102788752	1.65	0.000563	RIKEN cDNA 4921539E11 gene	70941	MGC130412|MGC130413
Zcchc11	chr4	+	107956107	107956470	1.96	0	107956007	107956356	1.07	0.000189	107956107	107956960	2.23	0	zinc finger, CCHC domain containing 11	230594	6030404K05Rik|KIAA0191|PPAPD3|mKIAA0191
Osbpl9	chr4	-	108603257	108603614	1.49	0.0031	108603057	108603614	1.1	0	108603257	108603614	2.52	0	oxysterol binding protein-like 9	100273	2600011I06Rik|AU015843|MGC30367|MGC38458|ORP-9
Cdkn2c	chr4	-	109165454	109165807	1.81	0	109165454	109165807	1.18	0.000241	109165554	109166212	1.65	0.000563	cyclin-dependent kinase inhibitor 2C (p18, inhibits CDK4)	12580	C77269|INK4c|INK4d|p18|p18INK4c
4732418C07Rik	chr4	+	115235825	115236374	1.77	0	115235525	115235974	0.81	0.00369	115236025	115236374	1.78	0	RIKEN cDNA 4732418C07 gene	230648	KIAA0494
4732418C07Rik	chr4	+	115235825	115236374	1.77	0	115236125	115236474	1.28	0	115236025	115236374	1.78	0	RIKEN cDNA 4732418C07 gene	230648	KIAA0494
Pik3r3	chr4	+	115719395	115719844	1.65	0	115719395	115719744	1.1	0.000204	115719295	115719744	1.49	0.00241	phosphatidylinositol 3 kinase, regulatory subunit, polypeptide 3 (p55)	18710	AA414954|p55pik
Ppt1	chr4	+	122355457	122356306	2.34	0	122355957	122356306	1.81	0	122355957	122356413	2.27	0	palmitoyl-protein thioesterase 1	19063	9530043G02Rik|AA960502|C77813|CLN1|D4Ertd184e|INCL|MGC107420|PPT
Cap1	chr4	-	122387816	122388565	1.14	0	122388016	122388465	0.76	0.00693	122387716	122388365	1.45	0	CAP, adenylate cyclase-associated protein 1 (yeast)	12331	-
Sf3a3	chr4	+	124216645	124217194	1.11	0.000779	124216645	124217194	0.89	0.00174	124217045	124217394	1.57	0.00184	splicing factor 3a, subunit 3	75062	4930512K19Rik|60kDa|MGC103282
Tlr12	chr4	-	128121143	128121592	1.96	0	128121143	128121592	1.1	0.000204	128121343	128121803	1.94	0	toll-like receptor 12	384059	Gm1365
BC030183	chr4	-	129082690	129082939	2.12	0	129082690	129082939	1.67	0	129082390	129082939	1.53	0.00183	cDNA sequence BC030183	230766	MGC29254
Khdrbs1	chr4	-	129245113	129245462	1.14	0.000372	129244513	129245370	0.6	0	129245013	129245370	2.11	0	KH domain containing, RNA binding, signal transduction associated 1	20218	Sam68|p62
Arid1a	chr4	-	133028758	133029107	1.3	0	133028358	133029907	1.52	0	133028358	133029807	1.24	0	AT rich interactive domain 1A (Swi1 like)	93760	1110030E03Rik|Osa1|Smarcf1
Cd52	chr4	-	133369353	133369702	2.22	0	133369253	133369702	1.23	0	133369253	133369804	1.57	0.00184	CD52 antigen	23833	AI463198|B7|B7-Ag|CAMPATH-1|CLS1|MB7
Ubxd5	chr4	+	133369353	133369702	2.22	0	133369253	133369702	1.23	0	133369253	133369804	1.57	0.00184	UBX domain containing 5	67586	4930506L07Rik|D4Bwg1540e|Soc|Soci
Tmem50a	chr4	-	134189142	134189491	1.65	0	134189142	134189491	0.99	0.000621	134189242	134189491	1.65	0.00632	transmembrane protein 50A	71817	3200001F09Rik|CAM|Smp1
Il28ra	chr4	+	134957849	134958298	1.62	0	134957749	134958298	1.07	0.000189	134957849	134958298	1.78	0	interleukin 28 receptor alpha	242700	CRF2-12|IFNLR1
Pnrc2	chr4	-	135148645	135148994	1.71	0	135148645	135148994	1.39	0	135148645	135148994	2.02	0	proline-rich nuclear receptor coactivator 2	52830	0610011E17Rik|D4Bwg0593e|MGC11707
Epha2	chr4	+	140571365	140571714	1.39	0	140571265	140571614	1.1	0.000204	140571065	140571714	1.36	0	Eph receptor A2	13836	AW545284|Eck|Myk2|Sek-2|Sek2
Dnajc16	chr4	-	141066270	141066520	1.74	0.00319	141066270	141066520	1.05	0.00211	141066270	141066520	1.61	0.0078	DnaJ (Hsp40) homolog, subfamily C, member 16	214063	2900037O03Rik|4732437J24Rik|D030060M24|mKIAA0962
Casp9	chr4	+	141066270	141066520	1.74	0.00319	141066270	141066520	1.05	0.00211	141066270	141066520	1.61	0.0078	caspase 9	12371	AI115399|AW493809|Caspase-9|ICE-LAP6|Mch6
Tnfrsf1b	chr4	-	144513307	144513756	1.68	0	144513507	144513856	1.41	0	144513307	144513756	1.57	0.00184	tumor necrosis factor receptor superfamily, member 1b	21938	CD120b|TNF-R-II|TNF-R2|TNF-R75|TNFBR|TNFR80|Tnfr-1|Tnfr2|p75
Mad2l2	chr4	+	146983439	146983988	1.27	0	146983239	146984188	0.89	0.00174	146983039	146983988	2.11	0	MAD2 mitotic arrest deficient-like 2 (yeast)	71890	2310033C13Rik|MAD2B|REV7
Nmnat1	chr4	-	148331490	148331846	1.81	0	148331490	148331846	1.39	0	148331390	148331739	2.23	0	nicotinamide nucleotide adenylyltransferase 1	66454	2610529L11Rik|5730441G13Rik|D4Cole1e|nmnat
Nadk	chr4	+	154403353	154403602	2.19	0	154403353	154403602	1.86	0	154403353	154403602	1.86	0	NAD kinase	192185	BC004012|MGC7589
Srpk2	chr5	-	23127542	23128825	0.87	0	23128249	23128636	0.77	0.00693	23128249	23128636	1.65	0.000563	serine/arginine-rich protein specific kinase 2	20817	AW226533|AW492537|AW547358|Wbp6|mSRPK2
6330412F12Rik	chr5	+	24196291	24196647	2.69	0	24196291	24196647	2.39	0	24196291	24196647	1.65	0.000563	RIKEN cDNA 6330412F12 gene	53312	4931404D21Rik|BS4|NY-REN-18|Nub1
Dnajb6	chr5	+	30065710	30066071	2.28	0	30065710	30066071	1.3	0	30065710	30066359	1.48	0.00241	DnaJ (Hsp40) homolog, subfamily B, member 6	23950	MGC102124|Mrj|mDj4
Cenpa	chr5	+	30943066	30943415	1.22	0.000108	30943166	30943515	0.85	0.00306	30943066	30943415	2.22	0	centromere autoantigen A	12615	Cenp-A
9430057O19Rik	chr5	+	31163785	31165234	0.9	0	31164385	31165334	0.93	0.0015	31164385	31165134	1.15	0.00239	RIKEN cDNA 9430057O19 gene	231093	4930455N08
BC023882	chr5	-	34485727	34486078	1.12	0.000779	34485727	34486276	1.46	0	34485727	34486078	1.69	0.000325	cDNA sequence BC023882	231123	D4S43h|D5H4S43|D5H4S43E|MGC36997|MGC38108|MGC38583
Poln	chr5	-	34485727	34486078	1.12	0.000779	34485727	34486276	1.46	0	34485727	34486078	1.69	0.000325	DNA polymerase N	272158	POL4P
Acox3	chr5	+	35900350	35900608	2.63	0	35899950	35900608	2.31	0	35900250	35900608	1.56	0.00184	acyl-Coenzyme A oxidase 3, pristanoyl	80911	BI685180|EST-s59|PCOX
Man2b2	chr5	-	37118999	37119348	1.99	0	37118899	37119348	1.57	0	37118999	37119348	2.47	0	mannosidase 2, alpha B2	17160	mKIAA0935
Tlr6	chr5	-	65238419	65239180	2.18	0	65238419	65238775	1.14	0.00022	65238419	65239180	1.44	0.00279	toll-like receptor 6	21899	-
Atp10d	chr5	+	72480727	72481076	2.69	0	72480727	72481076	1.91	0	72480727	72481076	1.85	0	ATPase, Class V, type 10D	231287	9830145H18Rik|ATPVD|D5Buc24e|MGC37731
A230062G08Rik	chr5	-	77980588	77980941	1.92	0	77980588	77980941	1.67	0	77980588	77980941	1.44	0.00279	RIKEN cDNA A230062G08 gene	231326	A830035E16|Aasdh
Rufy3	chr5	+	89638276	89638725	0.77	0.00608	89638276	89638631	1.06	0.000177	89638276	89638930	1.61	0.00127	RUN and FYVE domain containing 3	52822	2810428M05Rik|6330416M07Rik|AW455998|AW538594|D5Bwg0860e|Ripx|mKIAA0871
BC038311	chr5	-	91299213	91299562	0.96	0.00337	91299313	91299665	1.19	0.000241	91299213	91299665	1.48	0.00241	cDNA sequence BC038311	231430	-
Btc	chr5	-	92477863	92478212	2.24	0	92477963	92478412	1.19	0.000241	92477763	92478212	1.69	0.000325	betacellulin, epidermal growth factor family member	12223	-
Vdp	chr5	+	93212287	93212836	2.12	0	93211887	93212836	1.19	0	93212287	93212836	1.89	0	vesicle docking protein	56041	115kDa|TAP
Cxcl10	chr5	-	93424104	93424953	1.51	0	93424104	93424953	1.22	0	93424104	93424459	2.06	0	chemokine (C-X-C motif) ligand 10	15945	C7|CRG-2|INP10|IP-10|IP10|Ifi10|Scyb10|gIP-10|mob-1
Ccng2	chr5	+	94340730	94342682	1.15	0	94340730	94342582	1.03	0	94340730	94341784	2.06	0	cyclin G2	12452	MGC113793
Nudt9	chr5	+	104286562	104287011	1.09	0.00104	104286762	104287211	1.03	0.000498	104286262	104287011	1.28	0.00336	nudix (nucleoside diphosphate linked moiety X)-type motif 9	74167	1190002C07Rik|AI462474
5830443L24Rik	chr5	-	105293799	105294352	1.99	0	105293999	105294352	1.7	0	105293999	105294352	2.02	0	RIKEN cDNA 5830443L24 gene	76074	mGBP8
BC057170	chr5	-	105350716	105351065	2.18	0	105350716	105351065	2.12	0	105350716	105351065	2.51	0	cDNA sequence BC057170	236573	E430029F06
Mpa2	chr5	-	105379996	105380245	2.47	0	105379996	105380245	2.04	0	105379996	105380245	2.02	0	macrophage activation 2	17472	AW228052|Gbp4|KIAA4245|Mag-2|Mpa-2|mKIAA4245
LOC626578	chr5	-	105479773	105480329	1.44	0	105479773	105480329	1.49	0	105479973	105480329	1.77	0	similar to macrophage activation 2 like	626578	MGC117865|MGC118098
LOC634650	chr5	-	105586451	105587101	1.47	0	105586651	105587101	1.3	0	105586851	105587206	1.94	0	similar to macrophage activation 2	634650	MGC117932
Oasl2	chr5	+	115158293	115158642	2.02	0	115158293	115158642	1.46	0	115158293	115158642	1.56	0.00184	2'-5' oligoadenylate synthetase-like 2	23962	M1204|Mmu-OASL|Oasl
Oas1c	chr5	-	121073066	121073415	2.6	0	121073066	121073515	2.23	0	121073066	121073515	2.64	0	2'-5' oligoadenylate synthetase 1C	114643	MGC124107|Oasl2|Oasl5
Oas1b	chr5	+	121073066	121073415	2.6	0	121073066	121073515	2.23	0	121073066	121073515	2.64	0	2'-5' oligoadenylate synthetase 1B	23961	Flv|L1|Mmu-L1|Oias-2|Oias2|Wnv
Tmem116	chr5	+	121710659	121710908	2.08	0	121710659	121710908	1.86	0	121710659	121710908	2.59	0	transmembrane protein 116	77462	4930406A18Rik|4930513P12Rik|C030022K24Rik
Erp29	chr5	-	121711781	121712130	1.57	0.00343	121711781	121712233	0.77	0.00693	121711781	121712130	2.47	0	endoplasmic reticulum protein 29	67397	1200015M03Rik|2810446M09Rik|AW209030|Erp28|Erp31|PDI-Db
Tmem116	chr5	+	121711781	121712130	1.57	0.00343	121711781	121712233	0.77	0.00693	121711781	121712130	2.47	0	transmembrane protein 116	77462	4930406A18Rik|4930513P12Rik|C030022K24Rik
Ywhag	chr5	-	136218425	136218674	1.86	0	136218425	136218674	1.09	0.00112	136218425	136218674	1.73	0	3-monooxygenase/tryptophan 5-monooxygenase activation protein, gamma polypeptide	22628	D7Bwg1348e
Prkrip1	chr5	-	136483688	136483937	2.4	0	136483688	136483937	1.86	0	136483688	136483937	2.26	0	Prkr interacting protein 1 (IL11 inducible)	66801	8430424D23Rik|C114
Trim56	chr5	-	137400574	137400923	1.63	0	137400674	137401127	1.06	0.000177	137400674	137401023	1.32	0.00672	tripartite motif-containing 56	384309	A130009K11Rik|Gm452|MGC37358|RNF109
Gnb2	chr5	-	137762799	137763257	1.03	0.00239	137762799	137763148	0.88	0.00226	137762799	137763257	1.81	0	guanine nucleotide binding protein, beta 2	14693	Gnb-2
Mad1l1	chr5	-	140574374	140574723	1.47	0	140574374	140574723	0.9	0.00174	140574374	140574723	1.73	0	mitotic arrest deficient 1-like 1	17120	AI173502|AW550425|Mad1
Actb	chr5	-	143174336	143174685	1.31	0	143174336	143174885	0.61	0.00859	143174336	143174685	1.4	0.00307	actin, beta, cytoplasmic	11461	Actx|E430023M04Rik|beta-actin
Zfp99	chr5	-	145458684	145459033	1.86	0	145458684	145459033	0.98	0.000595	145458684	145459033	2.06	0	zinc finger protein 99	67235	2310046C23Rik|2810437E14Rik|MGC117641
Zfp95	chr5	+	145458684	145459033	1.86	0	145458684	145459033	0.98	0.000595	145458684	145459033	2.06	0	zinc finger protein 95	22757	AI132486|AI326970|hKraba1
B230342M21Rik	chr5	-	150863631	150864183	2.28	0	150863631	150864080	2.02	0	150863631	150864183	1.98	0	RIKEN cDNA B230342M21 gene	100637	AI428195
Shfm1	chr6	-	6530442	6530794	2.03	0	6530242	6530691	0.82	0.00369	6530442	6530794	1.66	0.000563	split hand/foot malformation (ectrodactyly) type 1	20422	DSS1|Shfdg1|Shfg
8430437G11Rik	chr6	-	13559232	13560189	2.38	0	13559232	13560490	1.45	0	13559232	13560689	2.61	0	RIKEN cDNA 8430437G11 gene	101118	5730526F17Rik|AI462344|AI504145
8430437G11Rik	chr6	-	13560933	13561182	2.81	0	13560933	13561182	2.37	0	13560933	13561182	3.07	0	RIKEN cDNA 8430437G11 gene	101118	5730526F17Rik|AI462344|AI504145
2310016C08Rik	chr6	+	29221029	29221378	1.19	0.000108	29221129	29221478	0.74	0.00969	29221129	29221478	1.66	0.000563	RIKEN cDNA 2310016C08 gene	69573	AW049004|MGC103106
Irf5	chr6	+	29474192	29474541	2.13	0	29474092	29474441	1.37	0	29474092	29474441	1.95	0	interferon regulatory factor 5	27056	AW491843|mirf5
Akr1b3	chr6	-	34247729	34248081	2.16	0	34247729	34248081	1.58	0	34247729	34248081	1.91	0	aldo-keto reductase family 1, member B3 (aldose reductase)	11677	ALR2|AR|Ahr-1|Ahr1|Akr1b1|Aldor1|Aldr1
1110007F12Rik	chr6	+	34792562	34793511	1.78	0	34792562	34793311	1.29	0	34793062	34793511	1.66	0.000563	RIKEN cDNA 1110007F12 gene	68487	-
Zc3hav1	chr6	-	38283831	38284180	1.91	0	38283831	38284180	1.37	0	38283731	38284180	1.41	0	zinc finger CCCH type, antiviral 1	78781	1200014N16Rik|2900058M19Rik|9130009D18Rik|D6Bwg1452e|ZAP
1110001J03Rik	chr6	+	38462902	38463251	1.5	0	38462902	38463551	1.53	0	38462502	38463851	1.08	0.00619	RIKEN cDNA 1110001J03 gene	66117	-
Gimap9	chr6	+	48605745	48606094	0.84	0.00667	48605745	48606094	0.79	0.00533	48605845	48606402	1.41	0	GTPase, IMAP family member 9	317758	A630002K24|BB145400
6330407D12Rik	chr6	+	49248688	49249137	1.22	0.000116	49248688	49249137	1.24	0	49248488	49248937	1.7	0.000325	RIKEN cDNA 6330407D12 gene	57895	AA675040|AI465320|AL022711
Osbpl3	chr6	-	50387518	50387872	2.25	0	50387618	50387979	1.61	0	50387618	50387979	2.36	0	oxysterol binding protein-like 3	71720	1200014M06Rik|6720421I08Rik|A530055M08|MGC102333|ORP3|OSBP3
BC022713	chr6	+	51259339	51259790	1.28	0	51259339	51259988	0.79	0.00501	51259639	51260088	1.57	0.00184	cDNA sequence BC022713	269739	D830038L22|MGC31500
Card4	chr6	-	54902239	54902799	1.34	0	54902339	54902799	0.84	0.00306	54902441	54902897	2.07	0	caspase recruitment domain 4	107607	C230079P11|F830007N14Rik|Nod1
Ppm1k	chr6	-	57465054	57465503	1.88	0	57464954	57465503	1.48	0	57465054	57465503	2.07	0	protein phosphatase 1K (PP2C domain containing)	243382	2900063A19Rik|A930026L03Rik|MGC115965
Herc3	chr6	+	58762283	58762639	1.53	0	58762183	58762737	1.06	0.000177	58762283	58762932	1.33	0.00263	hect domain and RLD 3	73998	5730409F18Rik|AI646603|MGC30404|mKIAA0032
Jmjd1a	chr6	-	71562634	71562983	1.28	0	71562534	71562883	1.79	0	71562534	71562883	1.45	0.00279	jumonji domain containing 1A	104263	1700105C21Rik|C230043E16Rik|Jmjd1|TGSA|Tsga|mKIAA0742
Arhgap25	chr6	-	87497881	87499040	1.75	0	87498481	87499040	1.32	0	87497881	87499040	1.37	0	Rho GTPase activating protein 25	232201	A130039I20Rik
Bhlhb2	chr6	+	108624156	108624605	1.84	0	108624256	108624705	1.32	0	108624156	108624605	2.07	0	basic helix-loop-helix domain containing, class B2	20893	C130042M06Rik|CR8|Clast5|Dec1|Sharp2|Stra13|Stra14
Edem1	chr6	+	108792267	108793416	0.94	0	108791867	108793320	0.77	0.00351	108792267	108792617	1.53	0.00907	ER degradation enhancer, mannosidase alpha-like 1	192193	A130059K23Rik|EDEM|KIAA0212|mKIAA0212
Vgll4	chr6	-	114840676	114841125	1.5	0	114840676	114841125	0.95	0.000687	114840676	114841525	1.28	0.00877	vestigial like 4 (Drosophila)	232334	BC048841|MGC54805|VGL-4
Raf1	chr6	-	115643375	115643729	1.72	0	115643375	115643729	1.29	0	115643375	115643729	1.33	0.00672	v-raf-leukemia viral oncogene 1	110157	6430402F14Rik|AA990557|BB129353|Craf1|D830050J10Rik|MGC102375|Raf-1|c-Raf|v-Raf
Zfp422	chr6	-	116596595	116596944	2.38	0	116596595	116596944	1.5	0	116596695	116597044	2.03	0	zinc finger protein 422	67255	2900028O21Rik|AU041373|KOX15|Krox-25-2|Krox-26|Krox25|Krox26
Jarid1a	chr6	+	120329633	120330082	1	0.00239	120329233	120330082	1.27	0	120329233	120330082	1.2	0.00277	jumonji, AT rich interactive domain 1A (Rbp2 like)	214899	AA409370|C76986|MGC11659|RBP2|Rbbp2
Bid	chr6	-	120882789	120883044	1.56	0.00359	120882789	120883044	1.72	0	120882789	120883044	2.36	0	BH3 interacting domain death agonist	12122	2700049M22Rik|AI875481|AU022477
Usp18	chr6	+	121210924	121211673	1.38	0	121211124	121211573	0.87	0.00226	121210824	121211673	1.37	0	ubiquitin specific peptidase 18	24110	1110058H21Rik|AW047653|UBP43|Ubp15
M6pr	chr6	+	122274006	122274355	0.81	0.00859	122274106	122274555	0.79	0.00533	122273806	122274555	1.33	0.00672	mannose-6-phosphate receptor, cation dependent	17113	CD-MPR|Mpr46
Necap1	chr6	+	122838425	122838789	2.53	0	122838425	122838789	2.03	0	122838425	122838789	2.44	0	NECAP endocytosis associated 1	67602	1200016B17Rik|AI747569|FLJ00061|mFLJ00061
Tapbpl	chr6	-	125197029	125197578	2.16	0	125197229	125197578	2.11	0	125197029	125197578	1.95	0	TAP binding protein-like	213233	BC017613|MGC27679|TAPBPL-R
Cd69	chr6	-	129240812	129241861	1.22	0	129240712	129241861	0.82	0.00405	129241312	129241770	1.91	0	CD69 antigen	12515	5830438K24Rik|AI452015|AIM|VEA
Clec12a	chr6	+	129315311	129316060	1.59	0	129315311	129316060	1.61	0	129315311	129315965	1.41	0	C-type lectin domain family 12, member a	232413	CLL-1|D230024O04|Micl
Clec1a	chr6	-	129417764	129418119	2	0	129417764	129418119	0.92	0.0014	129417764	129418119	1.66	0.000563	C-type lectin domain family 1, member a	243653	5930406N14Rik
Hist4h4	chr6	-	136768125	136769374	1.06	0	136768125	136769374	0.84	0.00877	136768125	136769374	1.2	0	histone 4, H4	320332	B130044J01Rik
H2afj	chr6	+	136768125	136769374	1.06	0	136768125	136769374	0.84	0.00877	136768125	136769374	1.2	0	H2A histone family, member J	232440	E130307C13|MGC118637
Aebp2	chr6	+	140583218	140583567	2.47	0	140583018	140583467	1.93	0	140582318	140583767	2.03	0	AE binding protein 2	11569	B230313N05Rik
Lrmp	chr6	+	145078150	145078999	1.69	0	145078150	145079299	1.13	0.00022	145077950	145079504	1.24	0.00376	lymphoid-restricted membrane protein	16970	AI553456|D6Int3|D6Int4|D6Int5|D6Int7|D6Int8|Jaw1
Tuba7	chr6	+	145573552	145573901	2.81	0	145573552	145573901	2.37	0	145573552	145573901	2.53	0	tubulin, alpha 7	22147	M[a]7
4933424B01Rik	chr6	-	146535755	146536113	2.31	0	146535755	146536113	1.79	0	146535755	146536215	1.95	0	RIKEN cDNA 4933424B01 gene	71177	MGC28965
Fgfr1op2	chr6	+	146535755	146536113	2.31	0	146535755	146536113	1.79	0	146535755	146536215	1.95	0	FGFR1 oncogene partner 2	67529	1500031J01Rik
Zfp667	chr7	+	5888416	5888765	1.61	0	5888416	5889265	1.39	0	5888416	5888765	2.6	0	zinc finger protein 667	384763	A830025F02Rik|Mip1|ZNF667
Olfr1344	chr7	+	6014137	6014486	2.78	0	6014137	6014486	2.32	0	6014137	6014486	2.44	0	olfactory receptor 1344	257882	4930415J05Rik|MOR124-1
6430701C03Rik	chr7	-	6885351	6885700	2.07	0	6885351	6885700	1.34	0	6885351	6885700	1.99	0	RIKEN cDNA 6430701C03 gene	76229	-
LOC665427	chr7	-	6885351	6885700	2.07	0	6885351	6885700	1.34	0	6885351	6885700	1.99	0	hypothetical protein LOC665427	665427	-
Zfp98	chr7	-	11954113	11954462	1.51	0	11954113	11954462	1.24	0	11954013	11954362	1.42	0.00279	zinc finger protein 98	109889	Mzf-2|Mzf1|Mzf2|Zfp121|Znf42
Sepw1	chr7	-	15080398	15081050	1.08	0	15080398	15080847	1.29	0	15080298	15080647	1.95	0	selenoprotein W, muscle 1	20364	selW
Napa	chr7	+	15256583	15256932	1.05	0.00104	15256583	15256932	0.82	0.00306	15256583	15256932	1.63	0.000563	N-ethylmaleimide sensitive fusion protein attachment protein alpha	108124	1500039N14Rik|AW209189|RA81|SNAPA|SNARE|a-SNAP|hyh
C530028I08Rik	chr7	-	18068776	18069225	0.8	0.00859	18068876	18069225	0.93	0.000687	18068776	18069125	1.38	0.00307	RIKEN cDNA C530028I08 gene	232933	Gm159
Gemin7	chr7	-	18736559	18736909	2.32	0	18736559	18736909	2.32	0	18736559	18736909	2.32	0	gem (nuclear organelle) associated protein 7	69731	2400008I04Rik|AI120175|AI461688
Zfp296	chr7	+	18736559	18736909	2.32	0	18736559	18736909	2.32	0	18736559	18736909	2.32	0	zinc finger protein 296	63872	2210018A16Rik
Zfp180	chr7	+	23790633	23791182	1.88	0	23790833	23791182	1.86	0	23790833	23791182	1.71	0	zinc finger protein 180	210135	2310040I01Rik|AI852378|D130011P11|HHZ168
Fbxo17	chr7	+	28423013	28423362	1.11	0.000372	28423013	28423362	0.82	0.00306	28423113	28423562	1.75	0	F-box protein 17	50760	FBXO26|Fbg4|Fbx17
5830482F20Rik	chr7	+	28497578	28498227	2.13	0	28497478	28497927	1.06	0.000189	28497478	28498327	1.83	0	RIKEN cDNA 5830482F20 gene	320435	MGC51433
Zfp84	chr7	+	29477061	29477410	1.51	0	29476561	29477515	1.44	0	29477061	29477410	1.55	0.00184	zinc finger protein 84	74352	4633401C23Rik|BB081605|KRAB18|Zfp69
Zbtb32	chr7	-	30303027	30303376	2.78	0	30302927	30303376	2.32	0	30302427	30303376	2.69	0	zinc finger and BTB domain containing 32	58206	4930524C15Rik|FAXF|FAZF|PLZP|Rog|Tzfp
Prrg2	chr7	-	44930273	44930722	0.83	0.00667	44930373	44930722	0.9	0.0014	44930173	44930722	1.3	0.00672	proline-rich Gla (G-carboxyglutamic acid) polypeptide 2	65116	1600014G02Rik|2510041M06Rik|N4WBP1
Nosip	chr7	+	44930273	44930722	0.83	0.00667	44930373	44930722	0.9	0.0014	44930173	44930722	1.3	0.00672	nitric oxide synthase interacting protein	66394	2310061K06Rik|CGI-25|MGC115777
Flt3l	chr7	-	45004268	45004617	2.32	0	45004268	45004617	2.14	0	45004268	45004721	2.52	0	FMS-like tyrosine kinase 3 ligand	14256	Ly72L
Cd37	chr7	-	45107407	45107656	2.07	0	45107407	45107656	1.26	0.0017	45107307	45107656	1.63	0.000563	CD37 antigen	12493	Tspan26
Emp3	chr7	-	45791063	45791412	1.3	0	45790963	45791612	0.88	0.00174	45790963	45791412	1.91	0	epithelial membrane protein 3	13732	H-4|H4|HNMP-1|MI-35|Ymp
BC013491	chr7	+	45791063	45791412	1.3	0	45790963	45791612	0.88	0.00174	45790963	45791412	1.91	0	cDNA sequence BC013491	211535	-
Akap13	chr7	+	75574359	75574713	1.7	0	75573559	75574713	1.52	0	75573759	75574713	2.08	0	A kinase (PRKA) anchor protein 13	75547	1700026G02Rik|5730522G15Rik|AKAP-Lbc|BRX|Ht31|LBC|PROTO-LB|PROTO-LBC
Isg20	chr7	+	78785920	78786369	1.27	0	78785920	78786269	0.8	0.00369	78785920	78786269	1.79	0	interferon-stimulated protein	57444	1600023I01Rik|2010107M23Rik|20kDa|DnaQL|HEM45
Isg20	chr7	+	78787320	78787669	2.1	0	78787220	78787569	1.06	0.000189	78787220	78787569	1.51	0.00183	interferon-stimulated protein	57444	1600023I01Rik|2010107M23Rik|20kDa|DnaQL|HEM45
Capn5	chr7	-	98053535	98053884	1.61	0	98053535	98053884	1.44	0	98053535	98053884	2.12	0	calpain 5	12337	-
Prkrir	chr7	+	98577304	98577753	1.98	0	98577304	98578153	1.44	0	98577304	98577753	2.28	0	protein-kinase, interferon-inducible double stranded RNA dependent inhibitor, repressor of (P58 repressor)	72981	2900052B10Rik|Dap4|MGC31389|Rpkrir
Uvrag	chr7	-	99018460	99018712	2.66	0	99018460	99018712	1.49	0	99018560	99019014	1.83	0	UV radiation resistance associated gene	78610	9530039D02Rik|AI648770|Uvrag1
Rps3	chr7	-	99357559	99358008	0.9	0.0043	99357659	99358008	1.19	0	99357259	99358509	1.3	0	ribosomal protein S3	27050	D7Ertd795e|Rs_3
Ucp2	chr7	+	100367095	100367944	0.93	0	100367695	100368144	0.82	0.00306	100367695	100368047	2.08	0	uncoupling protein 2 (mitochondrial, proton carrier)	22228	Slc25a8
B930006L02Rik	chr7	+	100580107	100580456	1.79	0	100580107	100580456	1.39	0	100580207	100580556	1.71	0	RIKEN cDNA B930006L02 gene	319604	2610030B18Rik|mKIAA0280
3200002M19Rik	chr7	+	101770210	101770559	2.1	0	101770210	101770559	2.09	0	101770210	101770559	2.24	0	RIKEN cDNA 3200002M19 gene	75430	6330414C15Rik
Trim21	chr7	-	102438893	102439342	2.01	0	102438993	102439542	1.86	0	102438993	102439542	1.99	0	tripartite motif protein 21	20821	Ro52|Ssa1
Trim34	chr7	+	104118144	104118493	2.01	0	104118144	104118493	1.8	0	104118044	104118493	2.08	0	tripartite motif protein 34	94094	-
Trim12	chr7	-	104189026	104189375	1.42	0	104188926	104189375	1.24	0	104189026	104189775	1.34	0	tripartite motif protein 12	76681	2310043C01Rik
9230105E10Rik	chr7	-	104226908	104227257	1.79	0	104226908	104227257	1.7	0	104226908	104227560	2.03	0	RIKEN cDNA 9230105E10 gene	319236	TRIM5
Trim30	chr7	-	104338882	104339240	1.2	0.000116	104338882	104339240	0.77	0.00533	104338382	104339431	1.18	0.00877	tripartite motif protein 30	20128	Rpt-1|Rpt1
Ppfibp2	chr7	+	107385149	107385598	1.42	0	107385149	107385498	1.19	0	107385049	107385400	1.95	0	protein tyrosine phosphatase, receptor-type, F interacting protein, binding protein 2	19024	Cclp1|MGC117695
Zfp143	chr7	+	109852643	109853498	1.61	0	109851943	109853593	1.47	0	109852643	109852997	1.26	0.00877	zinc finger protein 143	20841	AA959806|AU015869|D7Ertd805e|KRAB14|SBF|Staf|Zfp79|Zfp80-rs1|pHZ-1
Rnf141	chr7	-	110634804	110635057	1.54	0.00359	110634804	110635057	1.49	0	110634804	110635057	2.03	0	ring finger protein 141	67150	2610110L04Rik|AA792898|AU022812|ZFP36|ZNF230
Dkk3	chr7	-	111952538	111952887	1.57	0	111952538	111952887	1.19	0	111952538	111952887	1.42	0.00279	dickkopf homolog 3 (Xenopus laevis)	50781	AW061014|C87148
Arl6ip1	chr7	-	117920647	117920996	1.51	0	117920647	117920996	1.13	0.000231	117920647	117920996	1.63	0.000563	ADP-ribosylation factor-like 6 interacting protein 1	54208	AIP-6|AL022945|ARMER|AU042858|Aip-1|Arl6ip|C85138|mKIAA0069
2610207I05Rik	chr7	-	118035305	118035654	1.85	0	118035305	118035756	0.82	0.00316	118035305	118036361	2.2	0	RIKEN cDNA 2610207I05 gene	233789	C130002K18Rik|mKIAA0421
4930583K01Rik	chr7	+	118035305	118035654	1.85	0	118035305	118035756	0.82	0.00316	118035305	118036361	2.2	0	RIKEN cDNA 4930583K01 gene	67745	-
Armc5	chr7	+	128025954	128026305	2.16	0	128025954	128026305	2.32	0	128025954	128026711	1.71	0	armadillo repeat containing 5	233912	AW049683|BC032200|MGC102240|MGC36606
Brwd2	chr7	+	129382815	129383164	1.27	0	129382815	129383164	1.06	0.000189	129382415	129383164	1.47	0.00241	bromodomain and WD repeat domain containing 2	207425	2900055P10Rik|AW489876|MGC47139|Wdr11|mKIAA1351
Athl1	chr7	+	140792967	140793316	1.61	0	140792767	140793116	0.9	0.0014	140792767	140793116	1.67	0.000325	ATH1, acid trehalase-like 1 (yeast)	212974	5730511L01Rik|BC023151|MGC28193
Irf7	chr7	-	141117271	141117720	1.57	0	141117071	141117420	1.44	0	141117071	141117520	1.87	0	interferon regulatory factor 7	54123	-
Lsp1	chr7	+	142269896	142270345	1.76	0	142269896	142270345	1.62	0	142269896	142270445	2.4	0	lymphocyte specific 1	16985	Lsp-1|WP34|p50|pp52
Tssc4	chr7	+	142878513	142878862	1.02	0.00157	142878613	142878962	0.95	0.000595	142878613	142878962	1.34	0.00458	tumor-suppressing subchromosomal transferable fragment 4	56844	AA241958|ESTM671070
Tnfsf13b	chr8	+	10006388	10006837	2.53	0	10005988	10006837	1.28	0	10006388	10006837	2.66	0	tumor necrosis factor (ligand) superfamily, member 13b	24099	BAFF|BLyS|D8Ertd387e|MGC124060|MGC124061|TALL-1|TALL1|THANK|TNFSF20|zTNF4
1700104B16Rik	chr8	-	35199326	35199775	0.76	0.00608	35199326	35199880	0.74	0.00969	35198826	35199383	1.49	0.00183	RIKEN cDNA 1700104B16 gene	78636	-
Cyp4v3	chr8	-	46831963	46832312	1.99	0	46831963	46832312	1.46	0	46831663	46832816	1.29	0.00263	cytochrome P450, family 4, subfamily v, polypeptide 3	102294	AU043077|AW111961
Irf2	chr8	+	48238139	48238890	1.68	0	48238339	48238689	1.78	0	48238639	48239093	2.02	0	interferon regulatory factor 2	16363	9830146E22Rik|AI646973|Irf-2|MGC117893
Irf2	chr8	+	48238139	48238890	1.68	0	48238339	48238689	1.78	0	48237939	48238488	1.9	0	interferon regulatory factor 2	16363	9830146E22Rik|AI646973|Irf-2|MGC117893
BC088983	chr8	-	59443017	59444073	0.92	0	59442917	59445086	0.82	0.00658	59443517	59444472	1.05	0.00619	cDNA sequence BC088983	382010	KIAA1712|MGC113766|mKIAA1712
Fbxo8	chr8	+	59443017	59444073	0.92	0	59442917	59445086	0.82	0.00658	59443517	59444472	1.05	0.00619	F-box only protein 8	50753	Fbx8
Mast3	chr8	-	73737297	73738146	1.42	0	73737297	73738146	1.01	0	73737297	73737746	2.62	0	microtubule associated serine/threonine kinase 3	546071	BC024265|mKIAA0561
Il12rb1	chr8	+	73737297	73738146	1.42	0	73737297	73738146	1.01	0	73737297	73737746	2.62	0	interleukin 12 receptor, beta 1	16161	CD212|IL-12R[b]
Bst2	chr8	-	74466368	74466817	1.52	0	74466468	74466817	1.51	0	74466568	74466919	1.57	0.00127	bone marrow stromal cell antigen 2	69550	2310015I10Rik|C87040|DAMP-1
BC049349	chr8	+	74877678	74878036	1.55	0	74877678	74878036	1.33	0	74877478	74878036	1.33	0.00458	cDNA sequence BC049349	234413	mszf37|mszf55-2
Rbmxrt	chr8	-	81405873	81406222	2.56	0	81405873	81406630	2.21	0	81405873	81406322	1.77	0	RNA binding motif protein, X chromosome retrogene	19656	Hnrpg|MGC102184
2410193C02Rik	chr8	+	81405873	81406222	2.56	0	81405873	81406630	2.21	0	81405873	81406322	1.77	0	RIKEN cDNA 2410193C02 gene	76775	P7
Dnaja2	chr8	-	88445926	88446277	0.92	0.0043	88445926	88446277	0.8	0.00533	88445926	88446277	1.33	0.00458	DnaJ (Hsp40) homolog, subfamily A, member 2	56445	2010206B19Rik|DNAJ|DNJ3|Dnaj3|HIRIP4|PRO3015|mDj3
9330175E14Rik	chr8	-	97323445	97323794	2.18	0	97323445	97323794	2.1	0	97323445	97323794	2.26	0	RIKEN cDNA 9330175E14 gene	320377	-
A630085K21	chr8	-	97323445	97323794	2.18	0	97323445	97323794	2.1	0	97323445	97323794	2.26	0	hypothetical protein A630085K21	330828	-
Appbp1	chr8	-	107424660	107425022	1.99	0	107424660	107425022	1.81	0	107424560	107424909	1.69	0	amyloid beta precursor protein binding protein 1	234664	59kDa|MGC29435|MGC36437|MGC36630
Ctrl	chr8	-	108826984	108827433	2.6	0	108827084	108827433	2.07	0	108826984	108827433	1.86	0	chymotrypsin-like	109660	0910001G08Rik|1810004D15Rik|AV005227|Ctra-1|Ctra1|FLJ00366|mFLJ00366
Psmb10	chr8	-	108826984	108827433	2.6	0	108827084	108827433	2.07	0	108826984	108827433	1.86	0	proteasome (prosome, macropain) subunit, beta type 10	19171	Mecl1
Mlkl	chr8	-	114225000	114225451	1.55	0	114224500	114225451	1.38	0	114224600	114225451	1.53	0.00184	mixed lineage kinase domain-like	74568	9130019I15Rik
Tubb3	chr8	+	126296501	126297358	1.42	0	126296501	126297650	0.66	0.0081	126296601	126297450	1.25	0.00877	tubulin, beta 3	22152	3200002H15Rik|M(beta)3|M(beta)6
A630001O12Rik	chr8	+	129725272	129725621	1.2	0.000108	129725272	129725723	1.38	0	129725372	129726021	1.45	0.00241	RIKEN cDNA A630001O12 gene	414091	-
Itgb1	chr8	+	131571120	131571469	2.28	0	131571120	131571469	1.81	0	131571020	131571372	2.3	0	integrin beta 1 (fibronectin receptor beta)	16412	4633401G24Rik|AA409975|AA960159|CD29|Fnrb|gpIIa
Csprs	chr8_random	-	162261	162610	1.11	0.0022	162261	162610	0.65	0.00824	162261	162510	1.07	0.00239	component of Sp100-rs	114564	D1Lub1|HSR|MGC29132
Casp1	chr9	+	5298577	5298926	2.55	0	5298577	5298926	2.11	0	5298577	5298926	2.75	0	caspase 1	12362	ICE|Il1bc
Birc2	chr9	-	7838333	7838786	1.45	0	7838033	7838786	1.3	0	7838033	7838884	1.65	0.00127	baculoviral IAP repeat-containing 2	11797	AW146227|Api1|Api2|Birc3|HIAP1|HIAP2|IAP1|IAP2|MIAP1|MIAP2|MIHB|MIHC|RNF48|cIAP-1|cIAP-2|cIAP1|cIAP2|mcIAP1
2810485I05Rik	chr9	+	13585749	13586608	1.1	0.000779	13585749	13586608	0.97	0.0014	13585649	13587300	1.95	0	RIKEN cDNA 2810485I05 gene	72826	C78303
Chordc1	chr9	+	18042318	18042767	0.98	0.00269	18042218	18042667	0.94	0.00174	18042518	18042867	1.36	0.00672	cysteine and histidine-rich domain (CHORD)-containing, zinc-binding protein 1	66917	1110001O09Rik|AA409036|Chp-1
Acad8	chr9	-	26749239	26749696	0.95	0.00939	26748939	26749696	0.85	0	26749239	26749588	1.24	0.00991	acyl-Coenzyme A dehydrogenase family, member 8	66948	2310016C19Rik|AI786953
Thyn1	chr9	+	26749239	26749696	0.95	0.00939	26748939	26749696	0.85	0	26749239	26749588	1.24	0.00991	thymocyte nuclear protein 1	77862	D730042P09Rik|HSPC144|MDS012|MY105|Thy28
Ets1	chr9	+	32494721	32495070	2.44	0	32494721	32495070	1.87	0	32494721	32495070	2.89	0	E26 avian leukemia oncogene 1, 5' domain	23871	D230050P06|Ets-1|MGC130355|MGC18571|Tpl1
Slc37a2	chr9	-	37005135	37005792	1.15	0.00243	37005235	37005685	0.8	0.0047	37005235	37005792	1.7	0.000313	solute carrier family 37 (glycerol-3-phosphate transporter), member 2	56857	G3PP|Slc37a1|cI-2|ci2
Tbrg1	chr9	-	37406146	37406399	3.04	0	37406146	37406399	2.24	0	37406146	37406399	3.12	0	transforming growth factor beta regulated gene 1	21376	AA408552|AA409675|NIAM|TB-5|mFLJ00213
Tmem24	chr9	-	44075089	44075438	2.81	0	44075089	44075438	1.99	0	44075089	44075438	1.98	0	transmembrane protein 24	71764	1300006O23Rik
Dpagt1	chr9	+	44075089	44075438	2.81	0	44075089	44075438	1.99	0	44075089	44075438	1.98	0	dolichyl-phosphate (UDP-N-acetylglucosamine) acetylglucosaminephosphotransferase 1 (GlcNAc-1-P transferase)	13478	AU021132|Dpagt2
C030014I23Rik	chr9	-	44233178	44233729	1.52	0.000414	44233178	44233729	0.85	0.00252	44233078	44233427	1.75	0.000342	RIKEN cDNA C030014I23 gene	77381	-
Bcl9l	chr9	+	44233178	44233729	1.52	0.000414	44233178	44233729	0.85	0.00252	44233078	44233427	1.75	0.000342	B-cell CLL/lymphoma 9-like	80288	B9L|BC003321|BCL9-2|DLNB11|MGC7014
Blr1	chr9	-	44277475	44278137	1.56	0.000437	44277475	44278137	1.52	0	44277475	44277924	1.42	0.00213	Burkitt lymphoma receptor 1	12145	CXC-R5|CXCR-5|CXCR5|Gpcr6|MDR15
Atp5l	chr9	-	44671808	44672257	1.52	0.000414	44672008	44672357	0.87	0.00207	44671808	44672357	1.24	0.00991	ATP synthase, H+ transporting, mitochondrial F0 complex, subunit g	27425	4933437C06Rik|MGC107313|MGC107547
Alg9	chr9	+	50526309	50526667	1.42	0.000684	50526309	50526758	0.97	0.000645	50526309	50526999	1.29	0.00487	asparagine-linked glycosylation 9 homolog (yeast, alpha 1,2 mannosyltransferase)	102580	8230402H15Rik|AI747665|B430313H07Rik|Dibd1
AI118078	chr9	+	55125351	55125700	1.39	0.000639	55125351	55125700	1.12	0.000188	55125351	55125700	1.24	0.00991	expressed sequence AI118078	244886	9630029F15
Sin3a	chr9	+	56871694	56872143	1.05	0.00445	56870894	56872043	0.8	0	56871594	56871943	1.56	0.000702	transcriptional regulator, SIN3A (yeast)	20466	AW553200|KIAA4126|Sin3|mKIAA4126|mSin3A
Ubl7	chr9	+	57708475	57708824	1.69	0.000194	57708272	57709024	1	0	57708475	57708824	2.48	0	ubiquitin-like 7 (bone marrow stromal cell-derived)	69459	2300004C15Rik
Pml	chr9	-	58047770	58048119	0.95	0.00939	58047670	58048119	0.85	0.00252	58047770	58048119	1.24	0.00991	promyelocytic leukemia	18854	1200009E24Rik|AI661194|Trim19
Stoml1	chr9	+	58047770	58048119	0.95	0.00939	58047670	58048119	0.85	0.00252	58047770	58048119	1.24	0.00991	stomatin-like 1	69106	1810015E19Rik|AI847431|SLP-1|STORP|UNC-24|WPB72
Zwilch	chr9	-	63970830	63971579	1.05	0	63970830	63971479	0.9	0	63971130	63971579	1.47	0.00164	Zwilch, kinetochore associated, homolog (Drosophila)	68014	2310031L18Rik
Rpl4	chr9	+	63970830	63971579	1.05	0	63970830	63971479	0.9	0	63971130	63971579	1.47	0.00164	ribosomal protein L4	67891	2010004J23Rik
Snx1	chr9	-	65922066	65922815	1.12	0	65921866	65922915	0.7	0.00394	65921966	65922415	1.61	0.000263	sorting nexin 1	56440	-
5730536A07Rik	chr9	+	65922066	65922815	1.12	0	65921866	65922915	0.7	0.00394	65921966	65922415	1.61	0.000263	RIKEN cDNA 5730536A07 gene	68250	Fam96a
Rab8b	chr9	-	66718248	66718597	1.52	0.000414	66718248	66719097	0.57	0.00385	66718148	66718597	1.42	0.00213	RAB8B, member RAS oncogene family	235442	5930437D16|D330025I23Rik
Nedd4	chr9	+	72458663	72459420	1.76	0	72458663	72459119	1.32	0	72458663	72459119	1.79	0.000379	neural precursor cell expressed, developmentally down-regulted gene 4	17999	AA959633|AL023035|AU019897|E430025J12Rik|Nedd4-1|Nedd4a|mKIAA0093
Slc17a5	chr9	-	78374049	78374498	1.52	0.000414	78373849	78374498	1.09	0	78374249	78374606	1.88	0	solute carrier family 17 (anion/sugar transporter), member 5	235504	4631416G20Rik|4732491M05|AST|ISSD|NSD|SD|SIALIN|SIASD|SLD
Ttk	chr9	+	83628157	83628914	1.66	0	83628157	83628914	1.32	0	83628157	83628613	1.93	0	Ttk protein kinase	22137	AL022661|Esk1|PYT|esk
Bcl2a1a	chr9	-	88529706	88530061	2.23	0	88529706	88530061	1.54	0	88529106	88530061	1.7	0.000313	B-cell leukemia/lymphoma 2 related protein A1a	12044	A1|BB218357|Bcl2a1|Bfl-1|Hbpa1
Bcl2a1d	chr9	-	88529706	88530061	2.23	0	88529706	88530061	1.54	0	88529106	88530061	1.7	0.000313	B-cell leukemia/lymphoma 2 related protein A1d	12047	A1-d
Bcl2a1a	chr9	+	88754462	88754911	1.93	0	88754462	88754911	1.62	0	88754462	88754911	1.7	0.000313	B-cell leukemia/lymphoma 2 related protein A1a	12044	A1|BB218357|Bcl2a1|Bfl-1|Hbpa1
4930579C12Rik	chr9	-	88977331	88977681	1.89	0	88977331	88977681	0.95	0.000944	88977331	88977681	1.33	0.00475	RIKEN cDNA 4930579C12 gene	319213	-
Xrn1	chr9	+	95763869	95764218	1.62	0.000333	95763869	95764918	0.9	0	95763769	95764218	1.75	0.000342	5'-3' exoribonuclease 1	24127	Dhm2|exo|mXrn1
Armc8	chr9	-	99378159	99378608	2.33	0	99378159	99378608	1.99	0	99378159	99378712	1.79	0	armadillo repeat containing 8	74125	1200015K23Rik|HSPC056
Mrpl3	chr9	+	104910753	104911502	1.05	0.00127	104910653	104912102	0.6	0	104911253	104911702	1.61	0.000263	mitochondrial ribosomal protein L3	94062	2010320L16Rik|5930422H18Rik|AA407889
Ppm1m	chr9	-	106057893	106058342	2.33	0	106057993	106058342	0.85	0.00252	106058093	106058542	1.29	0.00635	protein phosphatase 1M	67905	2810423O19Rik|AW610647|C77250|PP2Ceta
Ptk9l	chr9	+	106057893	106058342	2.33	0	106057993	106058342	0.85	0.00252	106058093	106058542	1.29	0.00635	protein tyrosine kinase 9-like (A6-related protein)	23999	A6-related|AU014993|Ptk9r|Twf2
Tlr9	chr9	+	106080466	106080815	2.77	0	106080466	106080815	1.47	0	106080566	106080915	2.21	0	toll-like receptor 9	81897	-
Ube1l	chr9	+	107833422	107833771	1.86	0	107833522	107833871	1.44	0	107833422	107833771	2.3	0	ubiquitin-activating enzyme E1-like	74153	1300004C08Rik
Rnf123	chr9	-	107936463	107937512	1.73	0	107936463	107937512	1.24	0.000239	107936363	107936812	1.38	0.00366	ring finger protein 123	84585	BC003945|Kpc1
Mst1	chr9	+	107936463	107937512	1.73	0	107936463	107937512	1.24	0.000239	107936363	107936812	1.38	0.00366	macrophage stimulating 1 (hepatocyte growth factor-like)	15235	D3F15S2h|D9H3F15S2|DNF15S2h|Hgfl
Ccrl2	chr9	-	110902636	110902985	1.52	0.000414	110902636	110903285	1.37	0	110902436	110903285	1.29	0.00635	chemokine (C-C motif) receptor-like 2	54199	1810047I05Rik|CCR11|Cmkbr1l2|E01|L-CCR
Ccrl2	chr9	-	110903836	110904185	1.12	0.0031	110903836	110904185	0.92	0.00145	110903836	110904785	1.42	0.00416	chemokine (C-C motif) receptor-like 2	54199	1810047I05Rik|CCR11|Cmkbr1l2|E01|L-CCR
4921528I07Rik	chr9	-	114166876	114167525	1.18	0.00724	114166876	114167525	0.72	0.00824	114166776	114167525	1.33	0.00475	RIKEN cDNA 4921528I07 gene	77049	-
Bcl2a1c	chr9	+	114178003	114178852	1.56	0.000437	114178103	114178852	0.97	0.000645	114178103	114179156	1.29	0.00635	B-cell leukemia/lymphoma 2 related protein A1c	12046	A1-c
Wdr45	chrX	+	6878761	6879210	1.34	0	6878761	6879110	0.91	0.000645	6878761	6879110	1.4	0.00213	WD repeat domain 45	54636	C79260|DXImx38e|JM5|Sfc19|Wdrx1
Gripap1	chrX	+	6946458	6946813	1.78	0	6946458	6946813	0.94	0.000555	6946458	6946813	2.21	0	GRIP1 associated protein 1	54645	AI854681|DXImx47e|GRASP-1|Sfc10|mKIAA1167
LOC668979	chrX	+	8148981	8149630	1.78	0	8149381	8149630	1.64	0	8148981	8149430	1.44	0.00164	hypothetical protein LOC668979	668979	-
Bcor	chrX	-	11239079	11239428	1.56	0.000194	11239079	11239428	1.19	0	11239079	11239428	1.22	0.00991	Bcl6 interacting corepressor	71458	5830466J11Rik|8430401K06Rik|D930024N20Rik|mKIAA1575
1200013B08Rik	chrX	+	44388103	44388552	0.97	0.00445	44388003	44388352	0.72	0.00533	44387903	44388352	1.26	0.00635	RIKEN cDNA 1200013B08 gene	74131	AW413946|SLY1
Elf4	chrX	-	44669224	44669573	2.28	0	44669224	44669573	1.61	0	44669224	44669673	2.39	0	E74-like factor 4 (ets domain transcription factor)	56501	AV314029|BC042423|MGC129343|MGC129361|Mef
Bcap31	chrX	-	69971375	69971733	2.59	0	69971375	69971733	1.22	0	69971475	69971827	1.89	0	B-cell receptor-associated protein 31	27061	Bap31
F8	chrX	-	71634994	71635443	1.97	0	71634994	71635443	0.98	0.000315	71635194	71635550	1.31	0.00475	coagulation factor VIII	14069	Cf-8|Cf8|FVIII
Fundc2	chrX	+	71634994	71635443	1.97	0	71634994	71635443	0.98	0.000315	71635194	71635550	1.31	0.00475	FUN14 domain containing 2	67391	4833415N24Rik|DC44|HCBP6
5430427O19Rik	chrX	+	82122341	82122992	1.44	0.000437	82122741	82123090	0.89	0.000944	82122741	82123090	1.53	0.000702	RIKEN cDNA 5430427O19 gene	71398	-
Pcyt1b	chrX	+	89907935	89908192	2.5	0	89907935	89908192	1.8	0	89907935	89908192	1.71	0.00329	phosphate cytidylyltransferase 1, choline, beta isoform	236899	AW045697|CTTbeta
Zfx	chrX	-	90378606	90378958	1.94	0	90377706	90378958	1.17	0.000239	90378006	90378958	2.16	0	zinc finger protein X-linked	22764	Zfx5|Zfx5,6|Zfx6
Ercc6l	chrX	-	98359895	98360248	1.94	0	98359395	98360144	1.19	0	98359895	98360248	1.4	0.00213	excision repair cross-complementing rodent repair deficiency complementation group 6 - like	236930	BC004701|D330021P09Rik|MGC7766
P2ry10	chrX	+	103291803	103292156	2	0	103291803	103292156	1.45	0	103291703	103292156	1.67	0.000313	purinergic receptor P2Y, G-protein coupled 10	78826	5830408N17Rik|P2Y10
2610002M06Rik	chrX	-	104018742	104019091	1.37	0.000512	104018842	104019191	1.38	0	104018842	104019191	1.67	0.000313	RIKEN cDNA 2610002M06 gene	67028	AI876413
Nap1l3	chrX	-	118514576	118514925	2.12	0	118514576	118514925	1.43	0	118514576	118514925	2.84	0	nucleosome assembly protein 1-like 3	54561	MB20
Btk	chrX	-	129929364	129929813	1.15	0.00115	129929464	129929913	0.87	0.00145	129929464	129929813	1.4	0.00213	Bruton agammaglobulinemia tyrosine kinase	12229	AI528679|xid
Rpl36a	chrX	+	129929364	129929813	1.15	0.00115	129929464	129929913	0.87	0.00145	129929464	129929813	1.4	0.00213	ribosomal protein L36a	19982	L44L|Rpl44
Armcx6	chrX	-	130098226	130098575	0.91	0.00676	130098326	130098685	1.17	0.000239	130098326	130098685	1.58	0.000263	armadillo repeat containing, X-linked 6	278097	AW060994|MGC27863
Armcx3	chrX	+	130098226	130098575	0.91	0.00676	130098326	130098685	1.17	0.000239	130098326	130098685	1.58	0.000263	armadillo repeat containing, X-linked 3	71703	1200004E24Rik|AI450003|ALEX3
Gnl3l	chrX	-	146357610	146358761	0.78	0.00372	146357610	146358366	0.58	0.00893	146357610	146358959	1.22	0	guanine nucleotide binding protein-like 3 (nucleolar)-like	237107	BC020354
Ctps2	chrX	+	158246294	158246543	2.81	0	158246294	158246543	2.1	0	158246294	158246543	2.8	0	cytidine 5'-triphosphate synthase 2	55936	CTPsH
Maximum distance between one peak from another in three different cell lines is below 500bp.
Minimun distance of peaks in three different cell lines to peak in MPC11 (negative control) is over 500bp if there is any peak detected in MPC11.
FDR, false discovery rate, is below 0.01.
Score is ChIP/input enrichment fold in log2
