# Supplementary material for: IRF8 Governs Expression of Genes Involved in Innate and Adaptive Immunity in Human and Mouse Germinal Center B Cells
Source: PLoS One. 2011 Nov 11;6(11):e27384. doi: 10.1371/journal.pone.0027384 (PMC3214047; doi:10.1371/journal.pone.0027384)
Supplement: Table S4 — List of mouse IRF8 targets with significant changes in their expression in IRF8 knock down cells. 1% of q-vaule( = FDR) in SAM was used to identify differentially expressed genes in IRF8 knock down cells. (XLSX) [file pone.0027384.s005.xlsx]

## Sheet: nr772targets_sig_microarray_qPC
TableS4. List of mouse IRF8 targets with significant changes in their expression in IRF8 knock down cells
A. up-regulated genes						B. down-regulated genes
Targets	EntrezID	Fold in log2	q-value(%)	qPCR		Targets	EntrezID	Fold in log2	q-value(%)	qPCR
Pecam1	18613	5.33434	0			H2-Ea	14968	-6.82857	0
Xrcc5	22596	4.29484	0	52.09		Epha2	13836	-5.66283	0
C130071C03Rik	320203	4.28149	0			Igl-V1	16142	-5.55228	0
Kynu	70789	3.98198	0			Kcnq5	226922	-4.73374	0
Pcgf5	76073	3.88986	0			Tcfap2a	21418	-4.63154	0
Tnfsf13b	24099	3.86714	0	16.86		Sepw1	20364	-4.56246	0
Irf7	54123	3.59929	0	40.98		Tcfap2a	21418	-3.8887	0
Mgat5	107895	3.38394	0			Nedd4	17999	-3.70151	0
Ncf4	17972	3.31257	0			Gadd45g	23882	-3.32884	0
Crem	12916	3.21412	0			Ccl5	20304	-3.23609	0	-22.4
Usp18	24110	3.14987	0			Tnfsf10	22035	-3.23133	0	-50.5
Madd	228355	3.12693	0.0111629			Mst1	15235	-3.13192	0
Parp8	52552	3.02927	0			Nap1l3	54561	-3.00022	0
Ms4a1	12482	2.93607	0			Inadl	12695	-2.95723	0
Prdx6	11758	2.81162	0			Osbpl3	71720	-2.62727	0.0261098
2810030E01Rik	72668	2.71414	0.0111629			Il12rb1	16161	-2.37346	0
Cd274	60533	2.64246	0			Cyp4v3	102294	-2.21113	0
Tlr4	21898	2.63807	0			C2ta	12265	-2.05874	0.01296
Ifih1	71586	2.49597	0.0111629	58.85		Ptch1	19206	-2.03889	0	-3.07
Aldh3b1	67689	2.44159	0			Traf1	22029	-1.97821	0	-5.01
Zbtb32	58206	2.42936	0			Tap1	21354	-1.97414	0	-4.61
Klhl14	225266	2.31561	0			Psmb9	16912	-1.97344	0
Isg20	57444	2.31483	0			Pex12	103737	-1.97055	0.0530092
Kcnmb4	58802	2.31459	0			Apcs	20219	-1.9222	0
2010005H15Rik	76770	2.18654	0.0111629			D19Ertd652e	70806	-1.90078	0.370008
Mlkl	74568	2.15264	0			Pcdhgc4	93707	-1.81804	0
Slc37a2	56857	2.12642	0			Psmb8	16913	-1.78083	0
Aif1	11629	2.02379	0			Elf4	56501	-1.69221	0.01296
Athl1	212974	1.91491	0			H2-Q8	15019	-1.6629	0
5430427O19Rik	71398	1.84721	0			Notch1	18128	-1.6237	0
Tlr9	81897	1.83009	0			Igl-V1	16142	-1.6199	0.262949
Lpxn	107321	1.80063	0			Mybl1	17864	-1.45612	0
Skil	20482	1.78515	0			Epsti1	108670	-1.42992	0.0940985
Usp18	24110	1.75845	0			H2-M3	14991	-1.42106	0
4921528I07Rik	77049	1.75046	0			Irf4	16364	-1.41048	0	-3.7
Cd53	12508	1.74404	0			Pcdhgc5	93708	-1.34582	0.0530092
Pcdhgb4	93701	1.69531	0			Ptch1	19206	-1.33134	0	-3.07
Mtbp	105837	1.69182	0			Acad8	66948	-1.29091	0.262949
Lgals8	56048	1.62199	0			Akr1b3	11677	-1.28492	0
F8	14069	1.58422	0			Grina	66168	-1.28304	0
Cutc	66388	1.56628	0			Ccng2	12452	-1.26724	0.01296
Fgfr1op2	67529	1.53389	0			H2-DMb1	14999	-1.26283	0.712719
Suv39h2	64707	1.52463	0			D18Ertd653e	52662	-1.25066	0
Emp3	13732	1.47205	0			B3gnt2	53625	-1.22149	0
Ass1	11898	1.42361	0			Man2b2	17160	-1.21999	0
Rabgap1l	29809	1.3918	0			Cstf2t	83410	-1.17512	0
Skil	20482	1.37544	0			Gramd3	107022	-1.14317	0
Isgf3g	16391	1.34511	0			Rhobtb1	69288	-1.12698	0
Ganc	76051	1.34157	0			Mrpl32	75398	-1.10963	0
Ly86	17084	1.31308	0			Cbln3	56410	-1.10422	0.01296
Sla	20491	1.303	0			2500004C02Rik	72326	-1.10029	0
Gdap10	14546	1.29954	0.0261098			Gnaz	14687	-1.05651	0
Cited2	17684	1.27383	0			Parp9	80285	-1.00742	0
Oas1c	114643	1.26776	0			Akap13	75547	-1.00102	0
Oasl2	23962	1.26153	0.0940985			B2m	12010	-0.98831	0	-2.22
Lrmp	16970	1.22176	0	1.49		Syt1	20979	-0.981277	0.01296
Dnaja2	56445	1.19659	0.0111629			Csprs	114564	-0.97234	0
Armc2	213402	1.19535	0			Akap13	75547	-0.971729	0
Ltbp1	268977	1.188	0			Syn3	27204	-0.965036	0.712719
Rufy3	52822	1.18499	0.0940985			Fars2	69955	-0.947083	0
Trim25	217069	1.18429	0			Plscr3	70310	-0.944463	0.0530092
Atxn7l1	380753	1.17597	0			Gem	14579	-0.943043	0.712719
Fundc2	67391	1.17233	0			Acox3	80911	-0.929958	0
Sar1b	66397	1.15853	0.0570822			Socs1	12703	-0.894573	0.0530092	-2.94
Mrpl13	68537	1.1519	0			Rfx5	53970	-0.885061	0
Irf5	27056	1.15044	0	2.63		Rad51l1	19363	-0.864504	0
2610002M06Rik	67028	1.14172	0			Mov10	17454	-0.860024	0
Rufy3	52822	1.10938	0.0111629			H2-Q7	15018	-0.843206	0.712719
Armcx3	71703	1.09545	0.0111629			Rhobtb1	69288	-0.831059	0.0384792
Tob2	57259	1.08283	0			Cflar	12633	-0.824552	0.0530092	1.55
Mcrs1	51812	1.07325	0			Cd37	12493	-0.815967	0.0940985
Lsp1	16985	1.06379	0			Eif4a2	13682	-0.807359	0.01296
Ppm1k	243382	1.04884	0			Hk1	15275	-0.78594	0
Arsk	77041	1.03759	0.141182			D930015E06Rik	229473	-0.78036	0
Ppfibp2	19024	1.00682	0.0111629			Elmo1	140580	-0.770108	0
Mad1l1	17120	0.970969	0.0570822			1700009J07Rik	75188	-0.758075	0.0384792
1110038F14Rik	117171	0.965518	0			Meig1	104362	-0.737147	0
Nfkb1	18033	0.955146	0	1.98		Mx2	17858	-0.701618	0.01296
Spred2	114716	0.951168	0.0384792			Ube1l	74153	-0.697574	0.183418
Elf1	13709	0.945399	0.0940985			Dnajc10	66861	-0.69376	0.183418
Ptprc	19264	0.937141	0	2.87		Eif4a2	13682	-0.683657	0.370008
Nadk	192185	0.921505	0			Rnf123	84585	-0.677878	0
Usp52	103135	0.904982	0			Exoc2	66482	-0.677399	0.01296
Zfyve26	211978	0.899119	0			Zbp1	58203	-0.677156	0.262949
Bcl9l	80288	0.877727	0.0384792			Zpbp2	69376	-0.663473	0.183418
Btk	12229	0.872239	0.0261098			Hist1h4h	69386	-0.651133	0.528076
Tnfrsf13b	57916	0.850587	0	2.37		Laptm4a	17775	-0.616271	0.01296
Ccrl2	54199	0.842662	0.0111629			Cct6b	12467	-0.607533	0.0940985
Ide	15925	0.831306	0.0570822			Psmb10	19171	-0.599402	0.0384792	-1.82
Oxsm	71147	0.827815	0			2310016C08Rik	69573	-0.592004	0.183418
Arnt	11863	0.823437	0			Ube2i	22196	-0.570604	0.0940985
Nmi	64685	0.814938	0.0261098			Stat1	20846	-0.567896	0.0570822	-1.29
Cpsf2	51786	0.796591	0.0111629			Casp1	12362	-0.565584	0.141182	1.99
Trim25	217069	0.792329	0			Ccl6	20305	-0.555144	0.0384792
Bard1	12021	0.780582	0.0111629			Ctps2	55936	-0.553937	0.262949
Aebp2	11569	0.773615	0.0530092			Sar1b	66397	-0.553386	0.0940985
3200002M19Rik	75430	0.773181	0			Nbr1	17966	-0.550735	0.01296
S100a13	20196	0.766144	0.0530092			Hus1	15574	-0.544069	0.0570822
Trim30	20128	0.758248	0			Itgb1	16412	-0.537424	0.141182
Igtp	16145	0.75228	0			Ubl7	69459	-0.534175	0.0384792
Trove2	20822	0.72684	0			Edem1	192193	-0.53009	0.0261098
2610008E11Rik	72128	0.700749	0.0570822			Fgfr1op2	67529	-0.526483	0.183418
Uchl5	56207	0.691281	0			Dnaja2	56445	-0.523367	0.0530092
Pold4	69745	0.675201	0.0261098			Eef1b2	55949	-0.510372	0.0570822
Btc	12223	0.673939	0.528076			Thyn1	77862	-0.471893	0.0261098
Cd52	23833	0.671194	0.183418			Psma2	19166	-0.469527	0.0940985
Sf3a3	75062	0.655923	0.0570822			Cysltr2	70086	-0.440571	0.0940985
Blnk	17060	0.638176	0.141182	1.63		Prkrir	72981	-0.430403	0.0570822
Zfp91	109910	0.635633	0.0111629			Stoml1	69106	-0.420359	0.712719
Ehd1	13660	0.634804	0.0940985			Erh	13877	-0.410126	0.262949
Cap1	12331	0.629487	0			Clasp1	76707	-0.409322	0.141182
Zwilch	68014	0.628694	0			Tap2	21355	-0.405404	0.712719	-2.08
Ercc6l	236930	0.625828	0.0261098			Pex13	72129	-0.401234	0.0940985
Nvl	67459	0.61936	0.0570822			Rabggta	56187	-0.399489	0.528076
Mrpl3	94062	0.614858	0.141182			Ppt1	19063	-0.389217	0.183418
Rnf141	67150	0.597025	0.528076			Zfp119	104349	-0.384402	0.141182
Cdkn2c	12580	0.594377	0.141182	2.08		Tmed7	66676	-0.348631	0.262949
Arl6ip1	54208	0.569939	0.0111629			Shfm1	20422	-0.335082	0.0940985
Nosip	66394	0.559162	0.0111629			Ppil3	70225	-0.296453	0.712719
Ebag9	55960	0.557322	0.0570822			Zswim1	71971	-0.29467	0.712719
Rhebl1	69159	0.5443	0.141182
Katna1	23924	0.519978	0.0384792
Bcor	71458	0.519315	0.712719
Wibg	78428	0.512686	0.0940985
Brca1	12189	0.509099	0.0261098	1.2
Tbrg1	21376	0.508815	0.0111629
Tmem67	329795	0.508125	0.0940985
Khdrbs1	20218	0.507934	0.0530092
Entpd5	12499	0.502577	0.141182
BC018101	449000	0.491921	0.0570822
Fbxo8	50753	0.489567	0.141182
Mad2l2	71890	0.48524	0.141182
Brwd2	207425	0.482106	0.262949
Cenpa	12615	0.471409	0.0940985
Aurkb	20877	0.469716	0.262949
Zfp422	67255	0.45789	0.0384792
Ets1	23871	0.443192	0.183418	1.25
Rab2b	76338	0.442996	0.528076
Zfp40	22700	0.43678	0.712719
Casp8ap2	26885	0.426474	0.370008
Ide	15925	0.421287	0.0530092
Pdcd11	18572	0.41307	0.183418
Gbp4	17472	0.405979	0.183418
3200002M19Rik	75430	0.398188	0.712719
Prkrip1	66801	0.378471	0.262949
Tbk1	56480	0.378379	0.262949
ORF19	68767	0.375065	0.712719
Nif3l1	65102	0.370054	0.262949
Csnk1a1	93687	0.365348	0.370008	1.31
Dtwd1	69185	0.347079	0.712719
Dgka	13139	0.345817	0.183418
Ptpn18	19253	0.344013	0.262949
Mnt	17428	0.333362	0.370008
Armc8	74125	0.287341	0.370008
F2rl1	14063	0.276852	0.712719
Qtrtd1	106248	0.261713	0.528076
Cflar	12633	0.254491	0.712719	1.55
Ncstn	59287	0.242571	0.712719
Prrg2	65116	0.231614	0.712719
1% of q-vaule in SAM was used to identify differentially expressed genes in IRF8 knock down cells.
