# Supplementary material for: IRF8 Governs Expression of Genes Involved in Innate and Adaptive Immunity in Human and Mouse Germinal Center B Cells
Source: PLoS One. 2011 Nov 11;6(11):e27384. doi: 10.1371/journal.pone.0027384 (PMC3214047; doi:10.1371/journal.pone.0027384)
Supplement: Table S5 — List of PU.1 targets in mouse GC cell lines. FDR(false discovery rate) is <0.01. Score is the fold enrichment of ChIP to input in log2. (XLSX) [file pone.0027384.s006.xlsx]

## Sheet: nrmousePU1targets
TableS5. List of PU.1 targets in mouse GC cell lines
Name	CHROMOSOME	STRAND	NFS201_PEAK_START	NFS201_PEAK_END	NFS201_PEAK_SCORE	NFS201_PEAK_FDR	NFS202_PEAK_START	NFS202_PEAK_END	NFS202_PEAK_SCORE	NFS202_PEAK_FDR	description	ncbi_gene_id	synonyms
Vcpip1	chr1	-	9733546	9733898	2.25	0	9732846	9733898	2.73	0	valosin containing protein (p97)/p47 complex interacting protein 1	70675	4932442A08|5730421J18Rik|5730538E15Rik|VCIP135|mKIAA1850
Tceb1	chr1	-	16642229	16642886	1.78	0	16642029	16642478	2.17	0	"transcription elongation factor B (SIII), polypeptide 1"	67923	2610043E24Rik|2610301I15Rik|AA407206|AI987979|AW049146
Ly96	chr1	+	16673519	16674270	1.74	0	16673519	16674270	2.69	0	lymphocyte antigen 96	17087	ESOP-1|MD-2|MD2
Kcnq5	chr1	-	21948682	21949436	2.38	0	21948682	21949036	2.36	0	"potassium voltage-gated channel, subfamily Q, member 5"	226922	7730402H11|9230107O05Rik|AA589396|D1Mgi1
B230209C24Rik	chr1	-	33827838	33828187	1.87	0.000805	33827638	33828187	1.98	0	RIKEN cDNA B230209C24 gene	320705	-
2310061I09Rik	chr1	-	34383605	34384654	1.49	0	34383705	34384554	1.6	0	RIKEN cDNA 2310061I09 gene	69668	Ccp1
Imp4	chr1	+	34383605	34384654	1.49	0	34383705	34384554	1.6	0	"IMP4, U3 small nucleolar ribonucleoprotein, homolog (yeast)"	27993	AA409888|AV031295|D1Wsu40e
Ptpn18	chr1	+	34404654	34405007	1.91	0.000532	34404654	34405007	2.26	0	"protein tyrosine phosphatase, non-receptor type 18"	19253	FLP1|HSCF|PTP-HSCF|PTP-K1|Ptpk1
Ptpn18	chr1	+	34417131	34417580	1.95	0.000387	34417131	34417680	1.98	0	"protein tyrosine phosphatase, non-receptor type 18"	19253	FLP1|HSCF|PTP-HSCF|PTP-K1|Ptpk1
Arid5a	chr1	+	36251554	36251903	2.33	0	36251554	36251903	2.69	0	AT rich interactive domain 5A (Mrf1 like)	214855	D430024K22Rik|MGC36895|Mrf1
Eif5b	chr1	+	37943439	37944289	1.7	0.00101	37943539	37943988	1.46	0.00944	eukaryotic translation initiation factor 5B	226982	A030003E17Rik|BC018347|IF2
Txndc9	chr1	-	37943439	37944289	1.7	0.00101	37943539	37943988	1.46	0.00944	thioredoxin domain containing 9	98258	AI098020|APACD
Slc9a2	chr1	+	40625092	40625444	2.08	0.000266	40624992	40625341	1.51	0.00724	"solute carrier family 9 (sodium/hydrogen exchanger), member 2"	226999	2210416H12Rik|4932415O19Rik|AV333884|MGC124408|MGC124410|NHE2
Tpp2	chr1	+	43878002	43878351	1.44	0.00443	43878002	43878351	1.88	0.00066	tripeptidyl peptidase II	22019	TppII
Bivm	chr1	+	44062688	44063037	1.44	0.00443	44062688	44063037	1.56	0.00592	"basic, immunoglobulin-like variable motif containing"	246229	AI854267
Kdelc1	chr1	-	44062688	44063037	1.44	0.00443	44062688	44063037	1.56	0.00592	KDEL (Lys-Asp-Glu-Leu) containing 1	72050	1810049A15Rik|5730416C13Rik|EP58|Kdel1
Wdr75	chr1	+	45739496	45739945	1.66	0.00113	45739696	45740045	1.7	0.00235	WD repeat domain 75	73674	1300003A18Rik|2410118I19Rik|C77608|FLJ12545
Slc39a10	chr1	-	46798605	46799056	1.7	0.00101	46798605	46799056	1.46	0.00376	"solute carrier family 39 (zinc transporter), member 10"	227059	2900042E17Rik|5430433I10|mKIAA1265
Hibch	chr1	+	52789267	52789716	1.66	0.00113	52789267	52789516	1.84	0.00445	3-hydroxyisobutyryl-Coenzyme A hydrolase	227095	2610509I15Rik|AI648812|MGC31364
Sf3b1	chr1	-	54971851	54972200	1.91	0.000532	54971851	54972200	1.98	0.000203	"splicing factor 3b, subunit 1"	81898	155kDa|2810001M05Rik|AA409119|Prp10|SAP155|SF3b155|TA-8|Targ4
Sf3b1	chr1	-	54973451	54973700	1.57	0.00516	54973451	54973700	1.84	0.00445	"splicing factor 3b, subunit 1"	81898	155kDa|2810001M05Rik|AA409119|Prp10|SAP155|SF3b155|TA-8|Targ4
Nif3l1	chr1	+	58389803	58390252	2.46	0	58390003	58390352	2.36	0	Ngg1 interacting factor 3-like 1 (S. pombe)	65102	1110030G24Rik|MGC107114
Ppil3	chr1	-	58389803	58390252	2.46	0	58390003	58390352	2.36	0	peptidylprolyl isomerase (cyclophilin)-like 3	70225	2310076N22Rik|2510026K04Rik|Cyp10l
Casp8	chr1	+	58739842	58740191	1.61	0.00152	58739842	58740191	1.46	0.00944	caspase 8	12370	Caspase-8|FLICE|MACH|Mch5
Als2	chr1	-	59181888	59182637	1.53	0.00263	59181988	59182337	1.74	0.00149	amyotrophic lateral sclerosis 2 (juvenile) homolog (human)	74018	3222402C23Rik|9430073A21Rik|Als2cr6|Alsin|MGC27807|mKIAA1563
Eef1b2	chr1	+	63110756	63111305	1.66	0	63110956	63111305	1.93	0.00018	eukaryotic translation elongation factor 1 beta 2	55949	2810017J07Rik|Eef1b
Ndufs1	chr1	-	63110756	63111305	1.66	0	63110956	63111305	1.93	0.00018	NADH dehydrogenase (ubiquinone) Fe-S protein 1	227197	5830412M15Rik|9930026A05Rik|MGC19199|MGC7850
Ndufs1	chr1	-	63112456	63112805	1.95	0.000387	63111656	63113016	1.08	0.00211	NADH dehydrogenase (ubiquinone) Fe-S protein 1	227197	5830412M15Rik|9930026A05Rik|MGC19199|MGC7850
Klf7	chr1	-	64056315	64056664	2.08	0.000266	64056315	64056664	1.74	0.00149	Kruppel-like factor 7 (ubiquitous)	93691	9830124P08Rik
9430067K14Rik	chr1	-	64862823	64863072	3.27	0	64862823	64863072	3.06	0	RIKEN cDNA 9430067K14 gene	241075	A230102O09Rik|AI449570
Wdt2	chr1	-	72147768	72148320	2.33	0	72147768	72148120	2.12	0	whn-dependent transcript 2	381269	Gm974|MGC92980|dsu
Xrcc5	chr1	+	72240672	72241021	1.4	0.00508	72240772	72241121	2.03	0	X-ray repair complementing defective repair in Chinese hamster cells 5	22596	AI314015|Ku80|Ku86
Smarcal1	chr1	+	72516017	72516466	1.83	0.00105	72516017	72517174	1.7	0.00235	"Swi/SNF related matrix associated, actin dependent regulator of chromatin, subfamily a-like 1"	54380	6030401P21Rik|Mharp
Aamp	chr1	-	74217808	74218157	2.04	0.00023	74217708	74218157	2.03	0	angio-associated migratory protein	227290	AU040907|Aamp-rs|MGC30660
Pnkd	chr1	+	74217808	74218157	2.04	0.00023	74217708	74218157	2.03	0	paroxysmal nonkinesiogenic dyskinesia	56695	2210013N15Rik|2810403H05Rik|AI854243|Brp17|MNCb-5687|MR-1|Tahccp2
Bcs1l	chr1	+	74521217	74521566	1.7	0.00101	74521217	74521566	1.56	0.00592	BCS1-like (yeast)	66821	9130022O19Rik
Zfp142	chr1	-	74521217	74521566	1.7	0.00101	74521217	74521566	1.56	0.00592	zinc finger protein 142	77264	9330177B18Rik|BB154236|mKIAA0236
Stk11ip	chr1	+	75404444	75404893	2.33	0	75404444	75404893	2.5	0	serine/threonine kinase 11 interacting protein	71728	1200014D22Rik|BB131189|LIP1|LKB1IP
Farslb	chr1	-	78373243	78373594	2.8	0	78373343	78373698	2.87	0	"phenylalanine-tRNA synthetase-like, beta subunit"	23874	C76708|Farsa|Farsl|Frsb
Ap1s3	chr1	-	79550237	79550986	2.8	0	79550237	79550986	2.83	0	"adaptor-related protein complex AP-1, sigma 3"	252903	1190009B22|Jr2|[s]3A
A830043J08Rik	chr1	-	80092918	80093277	1.66	0.00113	80092918	80093277	1.84	0.000905	RIKEN cDNA A830043J08 gene	241128	-
5830484A20Rik	chr1	+	84988560	84988910	1.44	0.00443	84988260	84988809	1.74	0	RIKEN cDNA 5830484A20 gene	109032	Ifi75|Ipr1|Sp110
A530032D15Rik	chr1	-	84988560	84988910	1.44	0.00443	84988260	84988809	1.74	0	RIKEN cDNA A530032D15Rik gene	381287	Gm1888|MGC130185|MGC130186
A530040E14Rik	chr1	+	84988560	84988910	1.44	0.00443	84988260	84988809	1.74	0	RIKEN cDNA A530040E14 gene	621875	-
C130026I21Rik	chr1	-	85148926	85149575	1.36	0.00156	85148926	85149575	1.65	0.00206	RIKEN cNDA C130026I21 gene	75307	-
LOC620078	chr1	-	85148926	85149575	1.36	0.00156	85148926	85149575	1.65	0.00206	similar to SP140 nuclear body protein (predicted)	620078	-
Csprs	chr1	-	87359975	87360432	1.23	0.0053	87359975	87360328	1.88	0.00066	component of Sp100-rs	114564	D1Lub1|HSR|MGC29132
LOC665338	chr1	-	87359975	87360432	1.23	0.0053	87359975	87360328	1.88	0.00066	similar to component of Sp100-rs	665338	-
5830484A20Rik	chr1	-	87431823	87432172	1.87	0.000805	87431823	87432172	1.93	0.00018	RIKEN cDNA 5830484A20 gene	109032	Ifi75|Ipr1|Sp110
LOC434484	chr1	+	87431823	87432172	1.87	0.000805	87431823	87432172	1.93	0.00018	similar to SP140 nuclear body protein%3B nuclear body protein Sp140	434484	-
MGC118608	chr1	-	87431823	87432172	1.87	0.000805	87431823	87432172	1.93	0.00018	similar to Sp110 nuclear body protein	619989	-
Sp100	chr1	+	87479334	87479799	2.59	0	87479334	87479683	2.92	0	nuclear antigen Sp100	20684	A430075G10Rik
LOC631657	chr1	+	87565771	87567320	1.49	0.00658	87565771	87566524	1.46	0.00376	hypothetical LOC631657	631657	-
A630001G21Rik	chr1	-	87567671	87568028	2.55	0	87567671	87568028	2.5	0	RIKEN cDNA A630001G21 gene	319997	-
LOC631657	chr1	+	87567671	87568028	2.55	0	87567671	87568028	2.5	0	hypothetical LOC631657	631657	-
Tnrc15	chr1	+	89155366	89156315	2.25	0	89155266	89156315	2.17	0	trinucleotide repeat containing 15	227331	2610016F01Rik|A830080H02Rik|AI852361|AW259676|BC006835|Gigyf2|MGC38689|mKIAA0642
Inpp5d	chr1	+	89451399	89451748	2.25	0	89451299	89451648	1.93	0.00018	inositol polyphosphate-5-phosphatase D	16331	145kDa|AI323613|MGC117680|SHIP|SHIP-1|s-SHIP
Ndufa10	chr1	-	94304214	94304563	1.53	0.00263	94304214	94304763	1.32	0.00758	NADH dehydrogenase (ubiquinone) 1 alpha subcomplex 10	67273	2900053E13Rik
Capn10	chr1	+	94764163	94765412	2.16	0	94764163	94764913	2.36	0	calpain 10	23830	AW049679|Capn8|mKIAA1845
Hdlbp	chr1	-	95308400	95309549	1.4	0.00439	95308500	95309249	1.32	0.00758	high density lipoprotein (HDL) binding protein	110611	1110005P14Rik|AA960365|AI118566|D1Ertd101e
Sept2	chr1	+	95308400	95309549	1.4	0.00439	95308500	95309249	1.32	0.00758	septin 2	18000	AW208991|Nedd5|mKIAA0158
2310044D20Rik	chr1	+	97143580	97143929	1.83	0.00105	97143680	97144029	1.56	0.00592	RIKEN cDNA 2310044D20 gene	67698	-
4930429M06Rik	chr1	+	99599952	99600401	2.08	0.000266	99599952	99600401	1.51	0.0036	RIKEN cDNA 4930429M06Rik	252876	8430411H10Rik|Gin-1|MGC29171
Hisppd1	chr1	-	99599952	99600401	2.08	0.000266	99599952	99600401	1.51	0.0036	histidine acid phosphatase domain containing 1	227399	AW555814|D330021B20|mKIAA0433
2310035C23Rik	chr1	+	107492409	107492764	1.53	0.00263	107492409	107492764	1.51	0.00724	RIKEN cDNA 2310035C23 gene	227446	6430401N10|mKIAA1468
Pign	chr1	-	107492409	107492764	1.53	0.00263	107492409	107492764	1.51	0.00724	"phosphatidylinositol glycan, class N"	27392	-
Clasp1	chr1	+	120215653	120216002	1.87	0.000805	120215653	120216002	1.98	0.000203	CLIP associating protein 1	76707	1700030C23Rik|5730583A19Rik|B130045P17Rik|KIAA0622|mCLASP1|mKIAA0622
Ralb	chr1	-	121331611	121332060	1.61	0.00152	121331811	121332160	2.07	0	v-ral simian leukemia viral oncogene homolog B (ras related)	64143	5730472O18Rik
Dbi	chr1	-	121950190	121950843	2.29	0	121950490	121950843	2.17	0	diazepam binding inhibitor	13167	ACBD1|Acbp
Slc35f5	chr1	+	127387731	127388080	1.4	0.00508	127387731	127388380	1.04	0.00195	"solute carrier family 35, member F5"	74150	1300003P13Rik|AI646727
Dars	chr1	-	130244310	130244859	1.44	0.00142	130244410	130244859	1.74	0.00149	aspartyl-tRNA synthetase	226414	5730439G15Rik
Mapkapk2	chr1	-	132925339	132925689	1.83	0.00105	132925339	132925689	1.56	0.00592	MAP kinase-activated protein kinase 2	17164	AA960234|MK2|Rps6kc1
2700049P18Rik	chr1	+	133355098	133355547	1.44	0.00443	133354698	133355547	1.74	0	RIKEN cDNA 2700049P18 gene	108900	MGC117955
Srgap2	chr1	-	133355098	133355547	1.44	0.00443	133354698	133355547	1.74	0	SLIT-ROBO Rho GTPase activating protein 2	14270	9930124L22Rik|AI448945|FBP2|Fnbp2|srGAP3
Slc41a1	chr1	+	133654772	133655421	1.7	0	133654272	133655021	1.84	0.000905	"solute carrier family 41, member 1"	98396	AI573938|B230315F01Rik
Elk4	chr1	+	133835571	133835922	1.36	0.00655	133835571	133836022	1.93	0.00018	"ELK4, member of ETS oncogene family"	13714	2310011G17Rik|A130026I01Rik|BB162516|Sap1
Ren1	chr1	+	135175361	135176016	1.19	0.00501	135175361	135176016	1.13	0.00891	renin 1 structural	19701	D19352|Ren|Ren-1|Ren-A|Ren1d|Rn-1|Rnr|renin b
Ren2	chr1	+	135175361	135176016	1.19	0.00501	135175361	135176016	1.13	0.00891	renin 2 tandem duplication of Ren1	19702	Ren|Ren-1|Ren-2|Ren-B|Rn-2|Rnr
BC003331	chr1	-	152154928	152155477	1.19	0.00899	152154728	152155677	1.74	0.00149	cDNA sequence BC003331	226499	MGC7150
Tpr	chr1	+	152154928	152155477	1.19	0.00899	152154728	152155677	1.74	0.00149	translocated promoter region	108989	2610029M07Rik|C77892
Ncf2	chr1	+	154569857	154570606	1.66	0.00113	154569457	154570107	1.65	0.00206	neutrophil cytosolic factor 2	17970	NOXA2|Ncf-2|p67phox
Smg7	chr1	-	154665351	154665700	2.04	0.00023	154665104	154665600	1.65	0.00307	"Smg-7 homolog, nonsense mediated mRNA decay factor (C. elegans)"	226517	9430023P16Rik|MGC91209|mKIAA0250
LOC626058	chr1	-	155176299	155176949	2.12	0	155176299	155176949	2.26	0	hypothetical LOC626058	626058	-
LOC626058	chr1	-	155177299	155178350	1.74	0	155177299	155178456	1.88	0	hypothetical LOC626058	626058	-
Stx6	chr1	+	156920309	156920958	2.16	0	156920309	156920958	1.93	0.00018	syntaxin 6	58244	2310039E05Rik|2410005I16Rik|AI415714|AI845861
Tor1aip1	chr1	-	157797485	157798249	2.21	0	157797485	157797834	2.36	0	torsin A interacting protein 1	208263	MGC6357
Rabgap1l	chr1	-	162630412	162630769	2.12	0	162630412	162630769	1.6	0.00419	RAB GTPase activating protein 1-like	29809	5830411O09Rik|8430421H08Rik|9630005B12Rik|AW049894|HHL|Hh1|mKIAA0471
2610300B10Rik	chr1	+	162907468	162907817	1.4	0.00508	162907168	162907717	1.65	0.00307	RIKEN cDNA 2610300B10 gene	70454	AW121806|AW550697
Dars2	chr1	-	162907468	162907817	1.4	0.00508	162907168	162907717	1.65	0.00307	aspartyl-tRNA synthetase 2 (mitochondrial)	226539	5830468K18Rik|MGC99963
Prdx6	chr1	-	163088153	163089002	2.38	0	163088053	163089002	1.7	0	peroxiredoxin 6	11758	1-cysPrx|9430088D19Rik|AA690119|Aop2|Aop2-rs3|Brp-12|CP-3|GPx|KIAA0106|Ltw-4|Ltw4|Lvtw-4|ORF06|Prdx5|Prdx6-rs3|aiPLA2|mKIAA0106
Blzf1	chr1	-	166143756	166145307	1.36	0	166143856	166144605	1.56	0.00418	basic leucine zipper nuclear factor 1	66352	1700030G05Rik|Blzf1l|Golgin-45|Jem-1
Nme7	chr1	+	166143756	166145307	1.36	0	166143856	166144605	1.56	0.00418	"non-metastatic cells 7, protein expressed in"	171567	D530024H21Rik|Nm23-M7|Nm23-r7
Rcsd1	chr1	-	167546239	167546788	1.83	0.00105	167546239	167546788	1.79	0.00137	RCSD domain containing 1	226594	A430105K13Rik|BC025872|MGC32399
Pou2f1	chr1	-	167771625	167771984	1.61	0.00152	167771425	167771877	1.56	0.00592	"POU domain, class 2, transcription factor 1"	18986	2810482H01Rik|Oct-1|Oct-1A|Oct-1B|Oct-1C|Oct-1L|Oct-1z|Otf-1|Otf1
Fcgr2b	chr1	-	172812504	172812953	1.99	0.00021	172812604	172812953	2.5	0	"Fc receptor, IgG, low affinity IIb"	14130	AI528646|CD32|F630109E10Rik|Fc[g]RII|FcgRII|Fcgr2|Fcgr2a|Fcr-2|Fcr-3|Ly-17|Ly-m20|LyM-1|Lym-1
Adamts4	chr1	+	173083824	173084173	1.53	0.00263	173083824	173084173	2.26	0	"a disintegrin-like and metallopeptidase (reprolysin type) with thrombospondin type 1 motif, 4"	240913	3830423K05|ADAM-TS4|ADAMTS-2|ADMP-1|mKIAA0688
Ndufs2	chr1	-	173083824	173084173	1.53	0.00263	173083824	173084173	2.26	0	NADH dehydrogenase (ubiquinone) Fe-S protein 2	226646	AL033311|MGC27667
Ufc1	chr1	-	173131168	173131621	2.46	0	173131168	173131717	1.93	0	ubiquitin-fold modifier conjugating enzyme 1	66155	1110021H02Rik|AA062310|ESTM29
Usf1	chr1	+	173247685	173248144	1.7	0.00101	173247685	173248144	1.56	0.00592	upstream transcription factor 1	22278	-
Usf1	chr1	+	173248695	173248944	2.38	0	173248695	173248944	2.03	0.0031	upstream transcription factor 1	22278	-
Cd84	chr1	+	173677028	173677377	1.53	0.00263	173677128	173677584	1.46	0.00944	CD84 antigen	12523	A130013D22Rik|CDw84|SLAMF5
Slamf6	chr1	+	173752293	173752942	1.7	0.00101	173752293	173752942	1.7	0.00235	SLAM family member 6	30925	KAL1|KAL1b|Ly108|NTB-A|NTBA|SF2000
Slamf6	chr1	+	173754293	173754749	2.16	0	173754293	173754842	2.31	0	SLAM family member 6	30925	KAL1|KAL1b|Ly108|NTB-A|NTBA|SF2000
Copa	chr1	+	173918527	173919376	1.44	0.00142	173919127	173919676	1.74	0	coatomer protein complex subunit alpha	12847	AU040324|xenin
Ncstn	chr1	-	173918527	173919376	1.44	0.00142	173919127	173919676	1.74	0	nicastrin	59287	9430068N19Rik|AA727311|Aph2|Kiaa0253|Nct|mKIAA0253
Slamf9	chr1	+	174311793	174312142	2.04	0.00023	174311793	174312142	2.36	0	SLAM family member 9	98365	2310026I04Rik|AI462096|CD2F-10|CD84-H1|Cd2f10|SF2001
Igsf9	chr1	+	174318852	174319201	1.87	0.000805	174318852	174319201	1.46	0.00944	"immunoglobulin superfamily, member 9"	93842	644ETD8|Dasm1|Kiaa1355-hp|NRT1|Ncaml|mKIAA1355
Apcs	chr1	-	174731776	174732429	1.53	0.00263	174731876	174732325	1.65	0.00307	serum amyloid P-component	20219	Sap
Kmo	chr1	+	177468519	177468869	2.38	0	177468519	177468869	2.03	0	kynurenine 3-monooxygenase (kynurenine 3-hydroxylase)	98256	AI046660
9630058J23Rik	chr1	+	181382823	181383172	2.5	0	181382823	181383172	2.12	0	RIKEN cDNA 9630058J23 gene	226744	MGC31547
Tfb2m	chr1	-	181382823	181383172	2.5	0	181382823	181383172	2.12	0	"transcription factor B2, mitochondrial"	15278	Hkp1
Hlx1	chr1	-	186435908	186436257	2.25	0	186435908	186436257	2.64	0	H2.0-like homeo box 1 (Drosophila)	15284	Hlx
Spata17	chr1	-	188917549	188917906	1.53	0.00263	188917549	188917906	2.12	0	spermatogenesis associated 17	74717	1700065F16Rik|4930504I07Rik|4930513F16Rik|MGC107213|MSRG-11
2310028N02Rik	chr1	+	193026229	193026578	2.25	0	193026229	193026578	2.45	0	RIKEN cDNA 2310028N02 gene	66950	AI118576
Dtl	chr1	-	193276196	193276545	2.08	0.000266	193276196	193276545	1.79	0.00137	denticleless homolog (Drosophila)	76843	2810047L02Rik|5730564G15Rik|Ramp
Ints7	chr1	+	193276196	193276545	2.08	0.000266	193276196	193276545	1.79	0.00137	integrator complex subunit 7	77065	5930412E23Rik
Traf3ip3	chr1	-	194902160	194902409	2.97	0	194902160	194902409	3.11	0	TRAF3 interacting protein 3	215243	6030423D04Rik|AI115021|MGC106845|MGC41284|T3jam
A130090K04Rik	chr10	+	3305180	3305536	2.11	0.00078	3305180	3305536	2.41	0	RIKEN cDNA A130090K04 gene	320495	-
Mthfd1l	chr10	-	6373273	6373622	1.91	0.00102	6373373	6374022	1.81	0	methylenetetrahydrofolate dehydrogenase (NADP+ dependent) 1-like	270685	2410004L15Rik|AI647056|Fthfsdc1
Nup43	chr10	+	7352690	7353039	1.87	0.00184	7352790	7353139	1.48	0.00418	nucleoporin 43	69912	2610016K01Rik|2610529I12Rik|43kDa|AA409950|p42
Pcmt1	chr10	-	7352690	7353039	1.87	0.00184	7352790	7353139	1.48	0.00418	protein-L-isoaspartate (D-aspartate) O-methyltransferase 1	18537	C79501|PIMT
Cited2	chr10	+	17410614	17411163	1.82	0.00198	17410514	17410865	1.72	0.00144	"Cbp/p300-interacting transactivator, with Glu/Asp-rich carboxy-terminal domain, 2"	17684	AI835299|ER154-like|Mrg1|Msg2|p35srj
3110003A17Rik	chr10	-	17712360	17712809	2.68	0	17712360	17712809	2.55	0	RIKEN cDNA 3110003A17 gene	73112	1700028I04Rik|MGC107537
Tnfaip3	chr10	-	18704633	18704982	2.63	0	18704633	18704982	2.46	0	"tumor necrosis factor, alpha-induced protein 3"	21929	A20|Tnfip3
Raet1c	chr10	+	21862872	21863330	1.44	0.00805	21862872	21863229	1.39	0.00725	retinoic acid early transcript gamma	19370	RAE-1gamma
Raet1d	chr10	+	21862872	21863330	1.44	0.00805	21862872	21863229	1.39	0.00725	retinoic acid early transcript delta	56554	MGC118478|RAE-1delta
Raet1e	chr10	+	21862872	21863330	1.44	0.00805	21862872	21863229	1.39	0.00725	retinoic acid early transcript 1E	379043	-
L3mbtl3	chr10	-	26066054	26066403	1.72	0.00293	26066054	26066511	2.04	0	l(3)mbt-like 3 (Drosophila)	237339	AI481284|MBT-1|MGC90546
Hddc2	chr10	+	31002483	31002832	2.2	0.000759	31002483	31002832	1.86	0.000468	HD domain containing 2	69692	2310057G13Rik|MGC129436|MGC129437
2700019D07Rik	chr10	-	33640526	33640882	1.58	0.0042	33640126	33640675	1.67	0.00145	RIKEN cDNA 2700019D07 gene	72580	MGC107205
Nt5dc1	chr10	-	34107547	34107896	1.91	0.00102	34107547	34107896	1.67	0.00145	5'-nucleotidase domain containing 1	319638	6030401B09Rik|AW987726|MGC107414|Nt5c2l1
Fyn	chr10	+	39143801	39144556	1.53	0.0052	39144201	39144556	1.9	0	Fyn proto-oncogene	14360	AI448320|AW552119|MGC115870
Traf3ip2	chr10	+	39302633	39302982	2.87	0	39302533	39302982	2.37	0	Traf3 interacting protein 2	103213	AI429613|Act1
Qrsl1	chr10	-	43589477	43590226	1.68	0.00331	43589477	43590226	1.35	0	glutaminyl-tRNA synthase (glutamine-hydrolyzing)-like 1	76563	2700038P16Rik|C80053|GatA
Rtn4ip1	chr10	+	43589477	43590226	1.68	0.00331	43589477	43590226	1.35	0	reticulon 4 interacting protein 1	170728	D10Ertd690e|NIMP
Mcmdc1	chr10	-	53287030	53287788	1.44	0.00805	53287330	53287687	1.48	0.00418	minichromosome maintenance deficient domain containing 1	71567	9030408O17Rik|Gm235|MCM9|MGC70158
Gcc2	chr10	+	57650532	57650881	1.77	0.00253	57650532	57650881	1.44	0.00544	GRIP and coiled-coil domain containing 2	70297	0610043A03Rik|2210420P05Rik|2600014C01Rik|AW112121|mKIAA0336
Lims1	chr10	+	57788429	57788985	1.58	0.0042	57788429	57788883	1.53	0.00294	LIM and senescent cell antigen-like domains 1	110829	2310016J22Rik|4921524A02Rik|AI507642|AU021743|AW551584|C430041B13Rik|Lims1l|PINCH|PINCH1
Cbara1	chr10	+	59097834	59098383	1.96	0	59097834	59098183	1.58	0.00239	calcium binding atopy-related autoantigen 1	216001	C730016L05Rik|CALC|MGC29229|MGC36365|MGC36503|MGC36634
Psap	chr10	+	59679567	59679916	2.15	0.000678	59679567	59679916	1.76	0.000822	prosaposin	19156	AI037048|SGP-1
Eif4ebp2	chr10	-	60848176	60848425	2.15	0	60848176	60848425	2.18	0	eukaryotic translation initiation factor 4E binding protein 2	13688	2810011I19Rik|4E-BP2|BC010348|PHAS-II
Vps26a	chr10	-	61881305	61881658	2.73	0	61881305	61881658	2.46	0	vacuolar protein sorting 26 homolog A (yeast)	30930	AA407240|HB58|Vps26
Vps26a	chr10	-	61882305	61882754	2.06	0.000699	61882405	61882754	1.35	0.00946	vacuolar protein sorting 26 homolog A (yeast)	30930	AA407240|HB58|Vps26
Prg1	chr10	-	61904541	61904894	1.48	0.00597	61904441	61904894	1.25	0.00877	"proteoglycan 1, secretory granule"	19073	Prg|Sgc
Dna2l	chr10	+	62340759	62341116	1.91	0.00102	62340059	62341017	1.58	0.00239	DNA2 DNA replication helicase 2-like (yeast)	327762	E130315B21Rik|mKIAA0083
Tmem26	chr10	+	68119375	68119724	1.63	0.00368	68119375	68119724	2.09	0	transmembrane protein 26	327766	3230401A06|AI195372
Rhobtb1	chr10	+	68606216	68606565	2.87	0	68606216	68606973	3.25	0	Rho-related BTB domain containing 1	69288	1700008H16Rik|3110048G13Rik|AI173445|AI573858|MGC107538
Rhobtb1	chr10	+	68607116	68607665	1.44	0.00521	68607216	68607665	1.72	0.00144	Rho-related BTB domain containing 1	69288	1700008H16Rik|3110048G13Rik|AI173445|AI573858|MGC107538
Ank3	chr10	+	68929355	68929604	2.39	0	68929355	68929604	2.13	0	"ankyrin 3, epithelial"	11735	Ank-3|AnkG|Ankyrin-3|MGC14049
Gstt3	chr10	-	75224908	75225257	2.68	0	75224908	75225257	2.41	0	"glutathione S-transferase, theta 3"	103140	AI118089
Gstt2	chr10	-	75277252	75278001	1.39	0	75277252	75277501	1.86	0.00142	"glutathione S-transferase, theta 2"	14872	AI266894|Yrs|mGSTT2
Rnf126	chr10	-	79170203	79170552	2.44	0	79170203	79170552	1.99	0	ring finger protein 126	70294	2610010O19Rik
Dazap1	chr10	+	79664633	79665082	1.68	0.00331	79664833	79665182	1.48	0.00418	DAZ associated protein 1	70248	2410042M16Rik|mPrrp
Gamt	chr10	-	79664633	79665082	1.68	0.00331	79664833	79665182	1.48	0.00418	guanidinoacetate methyltransferase	14431	AA571402|Spintz1
Tcfe2a	chr10	-	79837042	79837391	1.63	0.00368	79837142	79837391	1.62	0.00604	transcription factor E2a	21423	A1|AA408400|ALF2|AW209082|E12|E12/E47|E2A|E47|ME2|Pan1|Pan2|TCF3|VDIR
Mknk2	chr10	-	80081572	80082021	1.53	0.0052	80081572	80082021	1.39	0.00725	MAP kinase-interacting serine/threonine kinase 2	17347	2010016G11Rik|Gprk7|Mnk2
Dot1l	chr10	+	80155184	80155533	1.72	0.00293	80155284	80155633	1.48	0.00418	"DOT1-like, histone H3 methyltransferase (S. cerevisiae)"	208266	A630076O07|AW907654|Dot1|mDot1
Thop1	chr10	+	80473137	80473593	1.77	0.00253	80473037	80473486	1.48	0.00418	thimet oligopeptidase 1	50492	AI131655|AI327041|EP24.15
F630110N24Rik	chr10	+	80759369	80759829	1.48	0.00597	80759569	80759918	1.72	0.00144	RIKEN cDNA F630110N24 gene	73822	C19orf28|Wdt1
Ankrd24	chr10	+	81030313	81030662	1.91	0.00102	81030413	81030762	1.58	0.00239	ankyrin repeat domain 24	70615	4631433D01Rik|5730519E19Rik|D10Bur2e
Sirt6	chr10	-	81030313	81030662	1.91	0.00102	81030413	81030762	1.58	0.00239	"sirtuin 6 (silent mating type information regulation 2, homolog) 6 (S. cerevisiae)"	50721	2810449N18Rik
BC024063	chr10	-	81360129	81360478	1.72	0.00293	81360129	81360478	1.44	0.00544	cDNA sequence BC024063	331188	A130081B01
Chst11	chr10	+	82414646	82414995	2.06	0.000699	82414646	82414995	1.48	0.00418	carbohydrate sulfotransferase 11	58250	1110020P09Rik|C4ST|C4ST-1|C4ST1|C4s
Ckap4	chr10	-	83964223	83965672	1.2	0.00159	83964323	83965079	1.44	0.00247	cytoskeleton-associated protein 4	216197	5630400A09Rik|CLIMP-63|P63
Rfx4	chr10	+	84267102	84267455	3.11	0	84267102	84267455	2.27	0	"regulatory factor X, 4 (influences HLA class II expression)"	71137	4933412G19Rik|NYD-sp10
Ric8b	chr10	+	84346864	84347413	1.96	0	84346964	84347413	2.09	0	resistance to inhibitors of cholinesterase 8 homolog B (C. elegans)	237422	BC051080|MGC58970|Ric-8
Mterfd3	chr10	-	84558223	84558672	2.2	0.000759	84558123	84558572	1.86	0.000468	MTERF domain containing 3	74238	1700007D05Rik
Gnn	chr10	+	86136054	86136505	1.53	0.0052	86135554	86137103	1.67	0	Grp94 neighboring nucleotidase variant 4	103220	BC030307|MGC40847
Hsp90b1	chr10	-	86136054	86136505	1.53	0.0052	86135554	86137103	1.67	0	"heat shock protein 90kDa beta (Grp94), member 1"	22027	ERp99|GRP94|Tra-1|Tra1|gp96
Cradd	chr10	-	94752003	94752352	1.82	0.00198	94751903	94752152	2.32	0	CASP2 and RIPK1 domain containing adaptor with death domain	12905	RAIDD
Galnt4	chr10	+	98537724	98538073	2.3	0.000325	98537724	98538073	1.67	0.00145	UDP-N-acetyl-alpha-D-galactosamine:polypeptide N-acetylgalactosaminyltransferase 4	14426	-
Wdr51b	chr10	+	98537724	98538073	2.3	0.000325	98537724	98538073	1.67	0.00145	WD repeat domain 51B	382406	4933430F16Rik
Dusp6	chr10	+	98690722	98691971	1.29	0	98690722	98691871	1.3	0	dual specificity phosphatase 6	67603	1300019I03Rik|MGC98540|MKP-3|MKP3|PYST1
Dusp6	chr10	+	98692522	98692871	1.53	0.0052	98692522	98692871	1.35	0.00946	dual specificity phosphatase 6	67603	1300019I03Rik|MGC98540|MKP-3|MKP3|PYST1
Tmtc2	chr10	-	104979395	104979744	2.11	0.00078	104979295	104979744	1.53	0.00107	transmembrane and tetratricopeptide repeat containing 2	278279	8430438D04Rik|D330034A10Rik|MGC116613
Rab21	chr10	-	114719936	114720285	1.87	0.00184	114720036	114720389	1.39	0.00725	"RAB21, member RAS oncogene family"	216344	9630024B22
Kcnmb4	chr10	-	115879783	115880132	2.3	0.000325	115879883	115880238	2.46	0	"potassium large conductance calcium-activated channel, subfamily M, beta member 4"	58802	1700058G18Rik|2900045G12Rik
Cnot2	chr10	-	115986954	115987304	1.77	0.00253	115986954	115987304	1.95	0	"CCR4-NOT transcription complex, subunit 2"	72068	2600016M12Rik|2810470K03Rik|AA537049|AA959607|AW557563|C79650|MGC115808
Ddit3	chr10	+	126693308	126693757	1.72	0.00293	126693008	126693757	0.97	0.00822	DNA-damage inducible transcript 3	13198	CHOP-10|CHOP10|chop|gadd153
Mbd6	chr10	-	126693308	126693757	1.72	0.00293	126693008	126693757	0.97	0.00822	methyl-CpG binding domain protein 6	110962	D10Wsu93e
Zbtb39	chr10	+	127139936	127140285	1.63	0.00368	127139736	127140187	1.35	0.00946	zinc finger and BTB domain containing 39	320080	7030401O21Rik|mKIAA0352
Timeless	chr10	+	127634578	127634929	2.06	0.000699	127634578	127634929	1.58	0.00239	timeless homolog (Drosophila)	21853	C77407|Debt69|tim
Cs	chr10	+	127740215	127740564	1.87	0.00184	127739315	127740564	1.25	0	citrate synthase	12974	2610511A05Rik|9030605P22Rik|Cis
Mbc2	chr10	-	127929258	127929707	2.54	0	127929058	127929707	1.81	0.00128	membrane bound C2 domain containing protein	23943	vp115
Zc3h10	chr10	-	127950243	127950592	2.54	0	127950243	127950592	2.6	0	zinc finger CCCH type containing 10	103284	AI790326
Rpl41	chr10	-	127951443	127952192	1.68	0	127951943	127952396	1.39	0.00725	ribosomal protein L41	67945	1810055P16Rik
Zc3h10	chr10	-	127951443	127952192	1.68	0	127951943	127952396	1.39	0.00725	zinc finger CCCH type containing 10	103284	AI790326
Pa2g4	chr10	-	127968087	127968336	2.92	0	127968087	127968336	2.55	0	proliferation-associated 2G4	18813	38kDa|AA672939|Ebp1|Plfap
Rps26	chr10	-	128029540	128029889	2.25	0.000277	128029540	128029889	2.18	0	ribosomal protein S26	27370	-
Dgka	chr10	-	128149305	128149656	3.35	0	128149305	128149656	2.46	0	"diacylglycerol kinase, alpha"	13139	80kDa|AW146112|Dagk1
Wibg	chr10	+	128149305	128149656	3.35	0	128149305	128149656	2.46	0	within bgcn homolog (Drosophila)	78428	A030010B05Rik|Pym
1500004A08Rik	chr11	+	3230490	3230839	1.85	0.00198	3230290	3230839	2.17	0	RIKEN cDNA 1500004A08 gene	216505	Crkd|Hgfl
Pes1	chr11	+	3863768	3864117	2.19	0.000678	3863768	3864117	2.03	0	"pescadillo homolog 1, containing BRCT domain (zebrafish)"	64934	-
2210403B10Rik	chr11	+	4955880	4956229	2.14	0.00078	4955380	4956529	1.65	0	RIKEN cDNA 2210403B10 gene	75668	AI852688|MGC130093|MGC130094
Polm	chr11	-	5737113	5737462	1.71	0.00331	5737113	5737462	1.7	0.00145	"polymerase (DNA directed), mu"	54125	AI462166|B230309I03Rik|Tdt-N
Polm	chr11	-	5737713	5738062	2.58	0	5737713	5738062	2.4	0	"polymerase (DNA directed), mu"	54125	AI462166|B230309I03Rik|Tdt-N
Zfpn1a1	chr11	+	11588920	11589269	1.71	0.00331	11588920	11589269	1.46	0.00544	"zinc finger protein, subfamily 1A, 1 (Ikaros)"	22778	5832432G11Rik|Ikaros|KIAA4227|LyF-1|Znfn1a1|hlk-1|mKIAA4227
Plek	chr11	-	16908197	16909254	1.9	0.00184	16908697	16909046	1.46	0.00544	pleckstrin	56193	2010300B13Rik
1500041B16Rik	chr11	+	16951486	16951935	1.51	0.00597	16951386	16951735	1.37	0.00946	RIKEN cDNA 1500041B16 gene	380686	3110054C06Rik|5330437A18Rik|AI854501|C2orf32
Plek	chr11	-	16951486	16951935	1.51	0.00597	16951386	16951735	1.37	0.00946	pleckstrin	56193	2010300B13Rik
Actr2	chr11	-	20012120	20012569	2.78	0	20012120	20012569	2.5	0	ARP2 actin-related protein 2 homolog (yeast)	66713	4921510D23Rik|AA409782|Arp2|D6Ertd746e|MGC36604
Actr2	chr11	-	20013220	20013470	1.75	0.00666	20013020	20013470	1.37	0.00946	ARP2 actin-related protein 2 homolog (yeast)	66713	4921510D23Rik|AA409782|Arp2|D6Ertd746e|MGC36604
Rab1	chr11	+	20101114	20101563	1.56	0.0052	20101114	20101463	1.37	0.00946	"RAB1, member RAS oncogene family"	19324	Gtbp|Rab-1|Rab1A|Ypt1|mKIAA3012
9130023F12Rik	chr11	-	20642030	20642479	2.34	0	20641930	20642287	2.07	0	RIKEN cDNA 9130023F12 gene	216549	AU018432|AU019184
AV249152	chr11	+	21471133	21472182	1.75	0	21471133	21472282	1.37	0.00423	expressed sequence AV249152	216560	-
Mdh1	chr11	-	21471133	21472182	1.75	0	21471133	21472282	1.37	0.00423	"malate dehydrogenase 1, NAD (soluble)"	17449	B230377B03Rik|D17921|MDH-s|MDHA|Mor-2|Mor2
A830031A19Rik	chr11	-	23977304	23977653	1.9	0.00184	23977304	23977653	1.84	0.000435	RIKEN cDNA A830031A19 gene	268391	Gm662
Bcl11a	chr11	+	23977304	23977653	1.9	0.00184	23977304	23977653	1.84	0.000435	B-cell CLL/lymphoma 11A (zinc finger protein)	14025	2810047E18Rik|Ctip1|D930021L15Rik|Evi9|mKIAA1809
A630052C17Rik	chr11	-	29072584	29072933	1.95	0.00102	29072684	29073033	2.21	0	RIKEN cDNA A630052C17 gene	320757	-
AW011752	chr11	+	29072584	29072933	1.95	0.00102	29072684	29073033	2.21	0	expressed sequence AW011752	104570	AW557776|KIAA1387|mKIAA1387
A430106J12Rik	chr11	+	29274224	29274473	2.39	0	29274224	29274473	1.6	0.00915	RIKEN cDNA A430106J12 gene	108686	AI848406|Ape|C130096N06Rik|C330012F17Rik|D130005J21Rik|Giv|Hkrp1
2010316F05Rik	chr11	-	29414378	29414727	2.68	0	29414378	29414727	2.26	0	RIKEN cDNA 2010316F05 gene	67939	-
Lcp2	chr11	+	33946917	33947573	1.95	0.00102	33946917	33947573	1.93	0	lymphocyte cytosolic protein 2	16822	AI323664|BB161688|SLP-76|twm
Dock2	chr11	-	34627256	34627605	2.39	0	34627256	34627605	2.21	0	dedicator of cyto-kinesis 2	94176	AI662014|AW122239|CED-5|Hch|MBC
Ccng1	chr11	-	40598565	40598914	2.14	0.00078	40598065	40598414	1.6	0.00239	cyclin G1	12450	AI314029
Ccng1	chr11	-	40598565	40598914	2.14	0.00078	40598665	40599123	1.65	0.00245	cyclin G1	12450	AI314029
Ttc1	chr11	-	43591346	43591701	2.34	0.000325	43591346	43591701	1.6	0.00239	tetratricopeptide repeat domain 1	66827	4833412C19Rik|C79328|TPR1
5730409G07Rik	chr11	-	45798590	45799039	1.56	0.0052	45798690	45799039	1.41	0.00725	RIKEN cDNA 5730409G07 gene	66628	1700121M19Rik|AA387658|MGC107321
Gnb2l1	chr11	+	48643446	48643795	2.58	0	48643446	48643695	2.78	0	"guanine nucleotide binding protein (G protein), beta polypeptide 2 like 1"	14694	GB-like|Gnb2-rs1|Rack1|p205
9930111J21Rik	chr11	-	48822701	48823050	2.09	0.000699	48822601	48822950	1.93	0	RIKEN cDNA 9930111J21 gene	245240	-
LOC667214	chr11	-	48822701	48823050	2.09	0.000699	48822601	48822950	1.93	0	"similar to immunity-related GTPase family, cinema 1"	667214	-
RP23-14F5.8	chr11	-	48822701	48823050	2.09	0.000699	48822601	48822950	1.93	0	similar to T-cell specific GTPase	432555	LOC432555
9930111J21Rik	chr11	-	48893509	48893758	3.17	0	48893509	48893758	3.3	0	RIKEN cDNA 9930111J21 gene	245240	-
Olfr56	chr11	+	48893509	48893758	3.17	0	48893509	48893758	3.3	0	olfactory receptor 56	18356	IF7|MOR276-1
9930111J21Rik	chr11	-	48894509	48894862	2.34	0.000325	48894509	48894862	2.4	0	RIKEN cDNA 9930111J21 gene	245240	-
Olfr56	chr11	+	48894509	48894862	2.34	0.000325	48894509	48894862	2.4	0	olfactory receptor 56	18356	IF7|MOR276-1
Canx	chr11	-	50169064	50169413	1.61	0.0042	50169064	50169413	1.37	0.00946	calnexin	12330	1110069N15Rik|AI988026|CNX|D11Ertd153e
BC049762	chr11	-	51107945	51109133	1.32	0.00644	51108345	51108798	1.37	0.00946	cDNA sequence BC049762	193286	4930503F14
Rmnd5b	chr11	-	51481623	51481975	2.73	0	51481323	51481879	2.36	0	required for meiotic nuclear division 5 homolog B (S. cerevisiae)	66089	0610039K22Rik
D11Ertd497e	chr11	+	51811535	51811784	1.75	0.00666	51811535	51811784	1.74	0.00316	"DNA segment, Chr 11, ERATO Doi 497, expressed"	52626	A430101B06Rik|AA409260|MNCb-1520
Anxa6	chr11	-	54866554	54866903	1.61	0.0042	54866554	54866903	1.46	0.00544	annexin A6	11749	AW107198|Anx6|AnxVI|Cabm|Camb
RP23-336J1.4	chr11	+	55312594	55312943	1.95	0.00102	55312494	55312843	1.51	0.00418	Ras-GTPase-activating protein SH3-domain binding protein	27041	AI849976|B430204O07|C87777|G3bp|KIAA4115|mKIAA4115
1810073G14Rik	chr11	-	57335010	57335359	2.29	0.000277	57335010	57335359	1.46	0.00544	RIKEN cDNA 1810073G14 gene	67726	9030624B09Rik
Mfap3	chr11	+	57335010	57335359	2.29	0.000277	57335010	57335359	1.46	0.00544	microfibrillar-associated protein 3	216760	2610509F16Rik|2700079M14Rik|AW536327
Cnot8	chr11	+	57920419	57920868	2.09	0.000699	57920419	57920868	1.41	0.00346	"CCR4-NOT transcription complex, subunit 8"	69125	1500015I04Rik|1810022F04Rik|AA536816|AU015770|AU043059
Igtp	chr11	+	58015642	58015991	1.51	0.00597	58015542	58015891	1.6	0.00239	interferon gamma induced GTPase	16145	AW558444
Iigp2	chr11	+	58015642	58015991	1.51	0.00597	58015542	58015891	1.6	0.00239	interferon inducible GTPase 2	54396	AI481100|GTPI|MGC102455
Iigp2	chr11	+	58030852	58031301	2.24	0	58030952	58031301	1.65	0.00245	interferon inducible GTPase 2	54396	AI481100|GTPI|MGC102455
Pemt	chr11	-	59862230	59862879	1.36	0.00598	59862230	59862879	1.37	0	phosphatidylethanolamine N-methyltransferase	18618	Pempt|Pempt2
Akap10	chr11	-	61747081	61747434	1.61	0.0042	61746781	61747434	1.46	0.00544	A kinase (PRKA) anchor protein 10	56697	1500031L16Rik|B130049N18Rik|D-AKAP2
Trpv2	chr11	+	62392011	62392360	2.19	0.000678	62392011	62392360	1.55	0.00294	"transient receptor potential cation channel, subfamily V, member 2"	22368	GRC|OTRPC2|VRL-1|Vrl1
Trpv2	chr11	+	62392611	62392860	1.75	0.00666	62392611	62392860	2.17	0	"transient receptor potential cation channel, subfamily V, member 2"	22368	GRC|OTRPC2|VRL-1|Vrl1
Cox10	chr11	-	63895566	63895915	1.56	0.0052	63895566	63895915	1.46	0.00544	"COX10 homolog, cytochrome c oxidase assembly protein, heme A: farnesyltransferase (yeast)"	70383	2410004F01Rik|AU042636
Pik3r5	chr11	+	68247682	68248131	1.95	0.00102	68247882	68248231	1.6	0.00239	"phosphoinositide-3-kinase, regulatory subunit 5, p101"	320207	AV230647|F730038I15Rik
Mpdu1	chr11	-	69478425	69478974	2.29	0.000277	69478425	69478974	1.65	0.00245	mannose-P-dolichol utilization defect 1	24070	LEC35|SL15|Supl15h
Cd68	chr11	-	69482125	69482474	2.19	0.000678	69482125	69482474	1.51	0.00418	CD68 antigen	12514	Scard1|gp110
Mpdu1	chr11	-	69482125	69482474	2.19	0.000678	69482125	69482474	1.51	0.00418	mannose-P-dolichol utilization defect 1	24070	LEC35|SL15|Supl15h
Eif4a1	chr11	-	69488551	69489007	1.85	0.00198	69488551	69488900	1.65	0.00245	eukaryotic translation initiation factor 4A1	13681	BM-010|Ddx2a|Eif4
Polr2a	chr11	-	69573768	69574117	1.71	0.00331	69573768	69574117	1.65	0.00245	polymerase (RNA) II (DNA directed) polypeptide A	20020	220kDa|Rpo2-1
Dullard	chr11	+	69796712	69797061	1.8	0.00253	69796712	69797061	1.79	0.000822	Dullard homolog (Xenopus laevis)	67181	2610507E10Rik
Rai12	chr11	-	69796712	69797061	1.8	0.00253	69796712	69797061	1.79	0.000822	retinoic acid induced 12	54351	-
Gabarap	chr11	+	69806825	69807774	2.05	0	69806825	69807774	1.41	0	gamma-aminobutyric acid receptor associated protein	56486	-
Phf23	chr11	+	69806825	69807774	2.05	0	69806825	69807774	1.41	0	PHD finger protein 23	78246	2410141M05Rik|JUNE-1
Dvl2	chr11	+	69811521	69811874	2.24	0.000759	69811625	69811974	1.93	0	"dishevelled 2, dsh homolog (Drosophila)"	13543	-
Phf23	chr11	+	69811521	69811874	2.24	0.000759	69811625	69811974	1.93	0	PHD finger protein 23	78246	2410141M05Rik|JUNE-1
Spag7	chr11	-	70484928	70485277	1.61	0.0042	70484828	70485177	1.37	0.00946	sperm associated antigen 7	216873	5730443G10|ACRP|FSA-1|Fsa1l|MGC67704
A430084P05Rik	chr11	-	70628606	70628955	2.53	0	70628606	70629155	2.36	0	RIKEN cDNA A430084P05 gene	327957	-
Dhx33	chr11	-	70820571	70820927	2.29	0.000277	70820471	70820927	1.27	0.00877	DEAH (Asp-Glu-Ala-His) box polypeptide 33	216877	3110057P17Rik|9430096J02Rik|Ddx33
Derl2	chr11	-	70835255	70835804	1.56	0.00317	70835355	70835804	1.46	0.00544	"Der1-like domain family, member 2"	116891	BC005682|CGI-101|Derlin-2|F-lana|Flana|MGC11613
Mis12	chr11	+	70835255	70835804	1.56	0.00317	70835355	70835804	1.46	0.00544	MIS12 homolog (yeast)	67139	2510025F08Rik|AU044651|Misc12
6720460F02Rik	chr11	+	71858003	71858352	1.95	0.00102	71858003	71858352	1.51	0.00418	RIKEN cDNA 6720460F02 gene	109212	2610008F03Rik|AI115087
Aipl1	chr11	-	71858003	71858352	1.95	0.00102	71858003	71858352	1.51	0.00418	aryl hydrocarbon receptor-interacting protein-like 1	114230	A930007I01Rik|MGC25485
Mnt	chr11	+	74644768	74645117	3.26	0	74644668	74645117	3.06	0	max binding protein	17428	Rox
Mnt	chr11	+	74646068	74646417	2.14	0.00078	74646068	74646517	1.7	0.00145	max binding protein	17428	Rox
Myo1c	chr11	+	75469795	75470144	2.34	0.000325	75469795	75470144	2.4	0	myosin IC	17913	C80397|MMIb|MYO1E|mm1beta|myr2
Myo1c	chr11	+	75470895	75471244	1.95	0.00102	75470895	75471244	2.07	0	myosin IC	17913	C80397|MMIb|MYO1E|mm1beta|myr2
2310047D13Rik	chr11	+	75995461	75996010	1.85	0	75995461	75996010	1.55	0.00107	RIKEN cDNA 2310047D13 gene	116972	5430402E13Rik|5430420K21Rik|Wdt3
Vps53	chr11	-	75995461	75996010	1.85	0	75995461	75996010	1.55	0.00107	vacuolar protein sorting 53 (yeast)	68299	2010002A08Rik|2310040I21Rik|3100002B05Rik
Ssh2	chr11	+	77030571	77032120	1.36	0	77030471	77032220	1.08	0	slingshot homolog 2 (Drosophila)	237860	BB104748|BC030940|SSH-2|mSSH-2L
Phf12	chr11	+	77798073	77798422	2.92	0	77797473	77798422	1.98	0	PHD finger protein 12	268448	2410142K10Rik|F630045O13|PF1|mKIAA1523
Spag5	chr11	+	78117385	78117734	1.8	0.00253	78117485	78117834	1.37	0.00946	sperm associated antigen 5	54141	AI874642|D11Bhm180e|Deepest|MAP126|Mastrin|S17
Evi2b	chr11	-	79339839	79340391	1.95	0	79339839	79340195	2.12	0	ecotropic viral integration site 2b	216984	Evi-2|Evi2|MGC28913
Evi2a	chr11	-	79346504	79346853	1.85	0.00198	79346104	79346853	1.65	0	ecotropic viral integration site 2a	14017	AW491894|Evi-2|Evi2
Evi2b	chr11	-	79346504	79346853	1.85	0.00198	79346104	79346853	1.65	0	ecotropic viral integration site 2b	216984	Evi-2|Evi2|MGC28913
4732497O03Rik	chr11	-	79778586	79779135	1.61	0.00393	79778586	79778942	1.46	0.00544	RIKEN cDNA 4732497O03 gene	216987	HCA66|MGC25509
Crlf3	chr11	-	79897290	79897639	1.71	0.00331	79897290	79897945	1.65	0.00245	cytokine receptor-like factor 3	54394	BB164954|Creme9|Crlf2|Cytor4
Slfn8	chr11	-	82836355	82837004	2.05	0.000795	82836255	82837004	2.69	0	schlafen 8	276950	MGC30719
Slfn3	chr11	+	83007474	83007923	1.66	0.00368	83007474	83007923	1.41	0.00725	schlafen 3	20557	-
1100001G20Rik	chr11	+	83562443	83562692	2.48	0	83562443	83562792	2.03	0	RIKEN cDNA 1100001G20 gene	66107	-
Tbx4	chr11	+	85709776	85710025	3.22	0	85709776	85710025	2.69	0	T-box 4	21387	3930401C23
Ptrh2	chr11	+	86500110	86500459	2.09	0.000699	86499810	86500259	1.41	0.00725	peptidyl-tRNA hydrolase 2	217057	A230072I16Rik|Bit1|CGI-147
Tmem49	chr11	-	86500110	86500459	2.09	0.000699	86499810	86500259	1.41	0.00725	transmembrane protein 49	75909	4930579A11Rik|AI787464
Mtmr4	chr11	+	87407864	87408213	1.8	0.00253	87407661	87408113	1.37	0.00946	myotubularin related protein 4	170749	AA596759|ESTM44|FYVE-DSP2|ZFYVE11|mKIAA0647
Trim25	chr11	+	88815278	88815627	2.19	0.000678	88815278	88815627	2.07	0	tripartite motif protein 25	217069	AA960166|AL022677|EFP|Zfp147
Nme1	chr11	-	93783700	93784859	1.32	0	93784600	93784952	1.46	0.00544	"expressed in non-metastatic cells 1, protein"	18102	AL024257|NM23-M1|NM23A
Spag9	chr11	+	93811255	93811604	1.46	0.00805	93811255	93811704	1.6	0.00239	sperm associated antigen 9	70834	3110018C07Rik|4733401I23Rik|4831406C20Rik|AW552012|JLP|JSAP2|JSAP2a|Jip4|Mapk8ip4|syd1
Myst2	chr11	-	95126414	95126763	1.9	0.00184	95126314	95127169	1.51	0.00418	MYST histone acetyltransferase 2	217127	Hbo1|Hboa|MGC56758
Ube2z	chr11	-	95880507	95880856	3.02	0	95880507	95880856	2.64	0	ubiquitin-conjugating enzyme E2Z (putative)	268470	AW049199|C030047H17Rik|D11Moh35
Atp5g1	chr11	-	95891775	95892224	1.51	0.00597	95891775	95892124	1.46	0.00544	"ATP synthase, H+ transporting, mitochondrial F0 complex, subunit c (subunit 9), isoform 1"	11951	-
Sp2	chr11	-	96793705	96794054	1.71	0.00331	96793705	96794154	1.37	0.00946	Sp2 transcription factor	78912	4930480I16Rik|mKIAA0048
2810474C18Rik	chr11	+	97559448	97560397	2.58	0	97559448	97559908	2.07	0	RIKEN cDNA 2810474C18 gene	72785	-
Pip5k2b	chr11	-	97559448	97560397	2.58	0	97559448	97559908	2.07	0	"phosphatidylinositol-4-phosphate 5-kinase, type II, beta"	108083	AI848124|PI5P4Kbeta|c11
Perld1	chr11	-	98216243	98216592	1.95	0.00102	98216243	98216692	1.7	0.00145	per1-like domain containing 1	320655	CAB2|D430035D22Rik
Ccr7	chr11	-	98971016	98971365	2.97	0	98971016	98971365	2.26	0	chemokine (C-C motif) receptor 7	12775	CD197|Cdw197|Cmkbr7|EBI1|Ebi1h
Cnp1	chr11	+	100391215	100391564	2.53	0	100391215	100391564	1.93	0	cyclic nucleotide phosphodiesterase 1	12799	CNPase|Cnp|Cnp-1
Stat3	chr11	-	100755527	100755976	1.66	0.00368	100755527	100755976	1.55	0.00294	signal transducer and activator of transcription 3	20848	1110034C02Rik|AW109958|Aprf
Atp6v0a1	chr11	+	100824294	100824950	3.07	0	100824294	100825443	3.06	0	"ATPase, H+ transporting, lysosomal V0 subunit A1"	11975	AA959968|ATP6a1|Atp6n1|Atp6n1a|Atpv0a1|Vpp-1|Vpp1
Ezh1	chr11	-	101037673	101038022	2.39	0	101037673	101038022	2.17	0	enhancer of zeste homolog 1 (Drosophila)	14055	AW557915|mKIAA0388
Brca1	chr11	-	101368660	101369209	2.14	0.00078	101367960	101369909	1.7	0	breast cancer 1	12189	-
Nbr1	chr11	+	101368660	101369209	2.14	0.00078	101367960	101369909	1.7	0	neighbor of Brca1 gene 1	17966	mKIAA0049
Nmt1	chr11	+	102844325	102844874	1.95	0.00102	102844125	102844874	1.41	0.00725	N-myristoyltransferase 1	18107	AW536594
Hexim1	chr11	+	102931964	102932313	2.58	0	102931664	102932513	1.74	0	hexamethylene bis-acetamide inducible 1	192231	7330426E13Rik|CLP-1|Clp1|HIS1
Hexim2	chr11	+	102948953	102949802	1.56	0.00317	102948753	102949304	1.6	0	hexamthylene bis-acetamide inducible 2	71059	4933402L21Rik
Arhgap27	chr11	-	103160642	103160991	1.95	0.00102	103160542	103160991	1.93	0	Rho GTPase activating protein 27	544817	2310069I04Rik|MGC62780
Gosr2	chr11	-	103514116	103514665	1.8	0.00253	103514016	103514371	1.74	0.00144	golgi SNAP receptor complex member 2	56494	2310032N09Rik|C76855|Gs27|SNARE|membrin
Limd2	chr11	-	105975426	105975775	2.05	0.000795	105975426	105975775	1.98	0	LIM domain containing 2	67803	0610025L06Rik|AI413966
2610019A05Rik	chr11	-	106009644	106009993	2.48	0	106009644	106009993	2.5	0	RIKEN cDNA 2610019A05 gene	72149	6030402H20Rik|AI480680|E130112C09Rik
Smarcd2	chr11	-	106088948	106089397	1.9	0.00184	106088948	106089297	1.74	0.00144	"SWI/SNF related, matrix associated, actin dependent regulator of chromatin, subfamily d, member 2"	83796	AW322457|Baf60b
Tcam1	chr11	+	106088948	106089397	1.9	0.00184	106088948	106089297	1.74	0.00144	testicular cell adhesion molecule 1	75870	4930570F09Rik|AI429105
Gm885	chr11	+	106567842	106568392	2.44	0	106567842	106568392	2.17	0	"gene model 885, (NCBI)"	380732	-
Pecam1	chr11	-	106567842	106568392	2.44	0	106567842	106568392	2.17	0	platelet/endothelial cell adhesion molecule 1	18613	Cd31|MGC102160|PECAM-1|Pecam
Ccdc45	chr11	+	106604981	106605430	2	0.00102	106604981	106605430	1.55	0.00294	coiled-coil domain containing 45	320162	4732496G21Rik|AI448335|D12Mgi16|D330027A14Rik|F630025I20Rik
Ddx5	chr11	-	106604981	106605430	2	0.00102	106604981	106605430	1.55	0.00294	DEAD (Asp-Glu-Ala-Asp) box polypeptide 5	13207	2600009A06Rik|G17P1|HUMP68|Hlr1|MGC118083|p68
Gna13	chr11	+	109177470	109178319	1.51	0	109177870	109178319	1.65	0.00245	"guanine nucleotide binding protein, alpha 13"	14674	AU024132|AU043124|Galpha13
X83328	chr11	+	109241785	109242134	2.29	0.000277	109241585	109242334	1.79	0	EST X83328	13929	AA408420|Amz2|ESTM12
Cd300lf	chr11	-	114949786	114950135	1.95	0.00102	114949786	114950135	1.55	0.00294	CD300 antigen like family member F	246746	CLIM1|CLM-1|CLM1|Digr2|F730004D16Rik|IREM1|IgSF13|Pigr3
Grin2c	chr11	-	115085683	115086032	2.48	0	115085583	115086032	1.79	0	"glutamate receptor, ionotropic, NMDA2C (epsilon 3)"	14813	NMDAR2C|NR2C
Armc7	chr11	+	115291616	115291965	1.61	0.0042	115291416	115291965	1.41	0.00346	armadillo repeat containing 7	276905	A630084C13|BC023126|MGC27721
Hmgb1	chr11	+	115398904	115399253	3.26	0	115398904	115399253	3.2	0	high mobility group box 1	15289	Hmg1|MGC103168|MGC103169|MGC117896|MGC117897
Slc25a19	chr11	-	115445956	115446305	2.48	0	115445956	115446305	1.88	0.000468	"solute carrier family 25 (mitochondrial deoxynucleotide carrier), member 19"	67283	2900089E13Rik|DNC|MUP1
Slc25a19	chr11	-	115447056	115447426	1.75	0.00666	115447056	115447426	1.7	0.0047	"solute carrier family 25 (mitochondrial deoxynucleotide carrier), member 19"	67283	2900089E13Rik|DNC|MUP1
Caskin2	chr11	-	115630978	115631327	1.75	0.00293	115630878	115631637	1.18	0	cask-interacting protein 2	140721	mKIAA1139
Tsen54	chr11	+	115630978	115631327	1.75	0.00293	115630878	115631637	1.18	0	"tRNA splicing endonuclease 54 homolog (SEN54, S. cerevisiae)"	76265	0610034P02Rik
Exoc7	chr11	-	116122813	116123062	2.87	0	116122813	116123062	2.4	0	exocyst complex component 7	53413	70kDa|Exo70|mKIAA1067|sec70
Sec14l1	chr11	+	116930277	116931026	1.46	0.00805	116930677	116931026	1.55	0.00294	SEC14-like 1 (S. cerevisiae)	74136	1200017E04Rik|2810012L19Rik
Pscd1	chr11	-	118028079	118028328	2.73	0	118028079	118028328	1.88	0.00142	"pleckstrin homology, Sec7 and coiled-coil domains 1"	19157	CLM1|CTH-1|CYTIP|KIAA4240|mKIAA4240
Cant1	chr11	-	118235034	118235383	1.8	0.00253	118234834	118235383	1.55	0.00107	calcium activated nucleotidase 1	76025	5830420C20Rik|Apy1h|D11Bwg0554e|Entpd8|SCAN-1|Shapy
P4hb	chr11	-	120389593	120389949	2	0.00102	120389593	120389949	1.84	0.000435	"prolyl 4-hydroxylase, beta polypeptide"	18453	ERp59|PDI|Thbp
Arhgdia	chr11	-	120398187	120398536	1.51	0.00597	120398187	120398536	1.37	0.00946	Rho GDP dissociation inhibitor (GDI) alpha	192662	5330430M07Rik|Gdi-1|MGC101921|MGC7904|Rho-GDI|RhoDGI
LOC667740	chr11	-	120398187	120398536	1.51	0.00597	120398187	120398536	1.37	0.00946	hypothetical protein LOC667740	667740	-
BC017643	chr11	-	121044740	121045089	3.02	0	121044740	121045089	2.87	0	cDNA sequence BC017643	217370	MGC28978|MGC37062|MGC37382
Narf	chr11	+	121052992	121053341	1.71	0.00331	121052892	121053341	1.65	0.00245	nuclear prelamin A recognition factor	67608	4430402O11Rik
1700012B15Rik	chr12	+	3235260	3235613	2.31	0	3235260	3235713	1.99	0	RIKEN cDNA 1700012B15 gene	74173	1810036A22Rik
Dnmt3a	chr12	+	3834476	3834825	1.71	0.00253	3834576	3835125	1.41	0.00247	DNA methyltransferase 3A	13435	AU015806|W91664
Itsn2	chr12	+	4725726	4726077	2.17	0.000277	4725626	4725975	1.54	0.00239	intersectin 2	20403	AI327390|Ese2|Sh3d1B|Sh3p18|mKIAA1256
Wdr35	chr12	+	9000449	9000708	1.99	0	9000449	9000708	2.31	0	WD repeat domain 35	74682	4930459M12Rik|4931430C06|KIAA1336|mKIAA1336
Rock2	chr12	+	16919234	16919586	2.13	0.000759	16919234	16919683	1.59	0.00245	Rho-associated coiled-coil forming kinase 2	19878	B230113H15Rik|Rock-II|mKIAA0619
Id2	chr12	-	25685398	25685847	1.76	0.00198	25685598	25686047	1.27	0.00602	inhibitor of DNA binding 2	15902	AI255428|C78922|Idb2
Atxn7l1	chr12	+	33887847	33888496	1.39	0.00805	33888047	33888496	1.36	0.00346	ataxin 7-like 1	380753	-
Etv1	chr12	+	39288497	39288846	2.36	0	39288497	39288846	1.59	0.00245	ets variant gene 1	14009	ER81|Etsrp81
Arl4a	chr12	-	40550584	40551033	2.59	0	40550684	40551033	2.04	0	ADP-ribosylation factor-like 4A	11861	AI467555|Arl4
Dock4	chr12	+	40957401	40957752	2.08	0.000678	40957201	40958555	1.68	0	dedicator of cytokinesis 4	238130	5330406C03|6330411N01Rik|AF263288|C030023J22|mKIAA0716
Zfp277	chr12	-	40957401	40957752	2.08	0.000678	40957201	40958555	1.68	0	zinc finger protein 277	246196	2410017E24Rik|NIRF4
Dnajb9	chr12	-	45080351	45080800	1.66	0.00293	45080351	45080700	1.31	0.00946	"DnaJ (Hsp40) homolog, subfamily B, member 9"	27362	AA408011|AA673251|AA673481|AW556981|ERdj4|Mdg1|mDj7
6030408C04Rik	chr12	+	52269226	52270375	1.06	0.00672	52269126	52270375	1.27	0.00602	RIKEN cDNA 6030408C04 gene	217558	9030416F18|AW046379|D930034K21Rik|mKIAA1333
2700097O09Rik	chr12	-	55998645	55998994	2.08	0.000678	55998445	55998994	1.63	0	RIKEN cDNA 2700097O09 gene	72658	AW552125
Srp54	chr12	+	55998645	55998994	2.08	0.000678	55998445	55998994	1.63	0	signal recognition particle 54	24067	54kDa
LOC665155	chr12	+	56073453	56073902	2.4	0	56073353	56073902	1.68	0	similar to signal recognition particle 54	665155	-
Srp54	chr12	+	56073453	56073902	2.4	0	56073353	56073902	1.68	0	signal recognition particle 54	24067	54kDa
LOC665355	chr12	-	56148363	56148912	2.22	0	56148263	56148912	1.59	0	similar to phosphatase subunit gene g4-1	665355	-
Srp54	chr12	+	56148363	56148912	2.22	0	56148263	56148912	1.59	0	signal recognition particle 54	24067	54kDa
Nfkbia	chr12	-	56410760	56411109	1.53	0.0042	56410860	56411209	1.68	0.00144	"nuclear factor of kappa light chain gene enhancer in B-cells inhibitor, alpha"	18035	AI462015|Nfkbi
Fbxo33	chr12	-	60124151	60124500	1.76	0.00198	60124251	60124881	1.59	0.00245	F-box only protein 33	70611	5730501N20Rik|AI642135
A430041B07Rik	chr12	+	65883613	65884263	1.94	0	65884013	65884362	2.09	0	RIKEN cDNA A430041B07 gene	328108	BC062107|C130034K06|KIAA0423|mKIAA0423
Btbd5	chr12	-	65883613	65884263	1.94	0	65884013	65884362	2.09	0	BTB (POZ) domain containing 5	66689	2810440N09Rik|4122402F11Rik|4931401E10Rik|MGC47075
C79407	chr12	-	66091035	66091384	1.9	0.00102	66091035	66091384	1.68	0.00144	expressed sequence C79407	217653	6720403H11|KIAA1903|mKIAA1903
Pole2	chr12	-	70146337	70146889	1.8	0.00184	70146337	70146889	1.36	0.00346	"polymerase (DNA directed), epsilon 2 (p59 subunit)"	18974	-
Txndc1	chr12	+	71371331	71371780	1.43	0.00597	71371231	71371780	1.63	0	thioredoxin domain containing 1	72736	2810425A04Rik|AI465319
2700049A03Rik	chr12	+	72055302	72056051	1.43	0	72055302	72055851	1.41	0.00544	RIKEN cDNA 2700049A03 gene	76967	mKIAA0586
Timm9	chr12	-	72055302	72056051	1.43	0	72055302	72055851	1.41	0.00544	translocase of inner mitochondrial membrane 9 homolog (yeast)	30056	2810011L15Rik|Tim10a|Timm10
2600001A11Rik	chr12	-	76588497	76588846	2.03	0.00078	76588397	76588846	1.59	0	RIKEN cDNA 2600001A11 gene	72338	MGC67964
Syne2	chr12	+	76736739	76737188	1.57	0.00368	76736739	76737088	1.9	0	synaptic nuclear envelope 2	319565	6820443O06Rik|AW546258|D12Ertd777e|MGC96690|NUA|Nesp2g|mKIAA1011
Churc1	chr12	+	77684036	77684385	1.94	0.000795	77683936	77684285	1.59	0.00245	churchill domain containing 1	211151	1700030P15Rik|My015|chch
Atp6v1d	chr12	-	79783090	79783447	1.99	0.000699	79783090	79783447	1.72	0.000822	"ATPase, H+ transporting, lysosomal V1 subunit D"	73834	1110004P10Rik|Atp6m|VATD|Vma8
6330442E10Rik	chr12	-	79899436	79899785	2.17	0.000277	79899436	79899885	1.95	0	RIKEN cDNA 6330442E10 gene	268567	9830138K24|AU019070
1810020G14Rik	chr12	-	82403841	82404199	1.62	0.00331	82403139	82404199	1.31	0.00423	RIKEN cDNA 1810020G14 gene	66272	1810055I05Rik|BB388670|MGC118423
Psen1	chr12	+	84578570	84578919	1.39	0.00805	84578570	84579019	1.31	0.00946	presenilin 1	19164	Ad3h|PS-1|PS1|S182
2410016O06Rik	chr12	+	84838867	84839223	1.76	0.00198	84838767	84839127	1.99	0	RIKEN cDNA 2410016O06 gene	71952	NO66
Zadh1	chr12	+	85174911	85175260	2.13	0.000759	85174911	85175260	1.99	0	"zinc binding alcohol dehydrogenase, domain containing 1"	77219	1810016I24Rik|9630002F03Rik|AI838763|B830026H24Rik
5830457H20Rik	chr12	+	85340939	85341388	1.76	0	85340539	85341089	1.5	0.00107	RIKEN cDNA 5830457H20 gene	217708	-
Aldh6a1	chr12	-	85340939	85341388	1.76	0	85340539	85341089	1.5	0.00107	"aldehyde dehydrogenase family 6, subfamily A1"	104776	1110038I05Rik|AI314632|MGC37325
Eif2b2	chr12	+	86108333	86108682	1.48	0.0052	86108333	86108682	1.68	0.00144	"eukaryotic translation initiation factor 2B, subunit 2 beta"	217715	AA409345|C85417|EIF-2Bbeta|EIF2B
1810048J11Rik	chr12	+	86362527	86363076	1.66	0	86362527	86363076	1.31	0.00423	RIKEN cDNA 1810048J11 gene	67708	4932413O10|AU017192
Fos	chr12	+	86362527	86363076	1.66	0	86362527	86363076	1.31	0.00423	FBJ osteosarcoma oncogene	14281	D12Rfj1|c-fos
Jundm2	chr12	+	86487157	86487614	1.66	0.00666	86487157	86487614	1.72	0.00224	Jun dimerization protein 2	81703	Jdp2|Jundp2|TIF
6430527G18Rik	chr12	-	87773904	87774253	1.85	0.00102	87773904	87774253	1.86	0	RIKEN cDNA 6430527G18 gene	238330	-
2310044G17Rik	chr12	+	87838709	87839858	1.99	0	87838709	87839858	1.77	0	RIKEN cDNA 2310044G17 gene	217732	AI842544|AI853744|mKIAA1737
Ahsa1	chr12	+	88155380	88155829	1.9	0	88155380	88155829	1.36	0.00725	"AHA1, activator of heat shock protein ATPase homolog 1 (yeast)"	217737	BC023857|MGC36589|MGC36618|p38
AI413782	chr12	-	88155380	88155829	1.9	0	88155380	88155829	1.36	0.00725	expressed sequence AI413782	104799	-
Sptlc2	chr12	-	88277483	88277932	2.59	0	88277483	88277832	2.63	0	"serine palmitoyltransferase, long chain base subunit 2"	20773	AI173915|LCB2|mKIAA0526
4930534B04Rik	chr12	-	91789563	91790012	1.53	0.0042	91789162	91789912	1.77	0	RIKEN cDNA 4930534B04 gene	75216	5430424K18Rik|AI449708|AI480494|E230024F20
LOC625794	chr12	-	93288951	93289400	1.43	0.00597	93289151	93289500	1.54	0.00239	hypothetical protein LOC625794	625794	-
LOC625794	chr12	-	93292351	93292704	1.94	0.000795	93292351	93292704	1.63	0.00145	hypothetical protein LOC625794	625794	-
Eml5	chr12	-	99201440	99201789	1.76	0.00198	99201440	99201789	1.45	0.00418	echinoderm microtubule associated protein like 5	319670	BC027154|C130068M19Rik
Psmc1	chr12	+	100510983	100511332	1.94	0.000795	100510983	100511332	1.5	0.00294	"protease (prosome, macropain) 26S subunit, ATPase 1"	19179	AI325227|P26s4|S4
Mjd	chr12	-	102359684	102360537	2.64	0	102359684	102360537	2.27	0	"Machado-Joseph disease (spinocerebellar ataxia 3, olivopontocerebellar ataxia 3, autosomal dominant, ataxin 3) homolog (human)"	110616	2210008M02Rik|AI647473|ATX3|MJD1|Sca3
Vrk1	chr12	+	106411038	106411687	1.8	0	106411138	106411687	1.59	0	vaccinia related kinase 1	22367	51PK
Cyp46a1	chr12	+	108781314	108781663	2.27	0	108781314	108781763	2.13	0	"cytochrome P450, family 46, subfamily a, polypeptide 1"	13116	Cyp46
Ppp2r5c	chr12	+	110933339	110933790	2.17	0.000277	110933139	110933790	1.41	0.00247	"protein phosphatase 2, regulatory subunit B (B56), gamma isoform"	26931	2610043M05Rik|2700063L20Rik|AI060890|AW545884|D12Bwg0916e|mKIAA0044
Pld4	chr12	+	113208312	113208661	2.17	0.000277	113208312	113208761	2.18	0	"phospholipase D family, member 4"	104759	AI132321
Pld4	chr12	+	113209912	113210161	2.03	0	113209912	113210161	1.81	0.00142	"phospholipase D family, member 4"	104759	AI132321
LOC668334	chr12	-	113465065	113465414	1.53	0.0042	113464965	113465414	1.41	0.00544	hypothetical protein LOC668334	668334	-
4930427A07Rik	chr12	+	113603778	113604227	1.62	0.00331	113603678	113604227	1.59	0.00245	RIKEN cDNA 4930427A07 gene	104732	AA536649|FLJ00116|mFLJ00116
Igh-6	chr12	-	113875171	113875527	1.48	0.0052	113875171	113875624	1.5	0.00294	immunoglobulin heavy chain 6 (heavy chain of IgM)	16019	AI326478|IgH|Igh-M|Igh6|Igm|MGC107036|MGC107507|MGC60843|VH7183.1A/DSP2.5/JH4|VH7183.1A/DSP2.X/JH4|muH
Igh-VJ558	chr12	-	113875171	113875527	1.48	0.0052	113875171	113875624	1.5	0.00294	immunoglobulin heavy chain (J558 family)	16061	AI893585|MGC118142|MGC6727
LOC544903	chr12	-	113875171	113875527	1.48	0.0052	113875171	113875624	1.5	0.00294	similar to immunoglobulin mu-chain	544903	MGC102663|MGC106397|MGC118133
BC016423	chr13	-	3610092	3610541	1.83	0.00184	3610092	3610541	1.68	0.00144	cDNA sequence BC016423	105203	AI645998|KIAA2006|MGC25933|Pap20|mKIAA2006
Gtpbp4	chr13	-	8995202	8995551	1.74	0.00253	8995202	8995551	1.36	0.00725	GTP binding protein 4	69237	2610028C09Rik|Crfg|Gtpbp3|NGB
Inhba	chr13	+	15803111	15804260	1.5	0.00317	15803111	15804460	1.18	0	inhibin beta-A	16323	-
Elmo1	chr13	+	20097733	20098182	2.25	0.000325	20097733	20098182	2.27	0	"engulfment and cell motility 1, ced-12 homolog (C. elegans)"	140580	6330578D22Rik|AI173001|C230095H21Rik|CED-12|KIAA0281|mKIAA0281
Elmo1	chr13	+	20192139	20193292	1.83	0	20192339	20192892	1.77	0.000435	"engulfment and cell motility 1, ced-12 homolog (C. elegans)"	140580	6330578D22Rik|AI173001|C230095H21Rik|CED-12|KIAA0281|mKIAA0281
Hist1h2ac	chr13	+	21723526	21724977	1.92	0	21723826	21724475	1.27	0	"histone 1, H2ac"	319164	9030420B16
Hist1h2ai	chr13	+	21723526	21724977	1.92	0	21723826	21724475	1.27	0	"histone 1, H2ai"	319191	H2a-291A
Hist1h2bl	chr13	-	21723526	21724977	1.92	0	21723826	21724475	1.27	0	"histone 1, H2bl"	319185	H2b-291a
Hist1h3h	chr13	+	21723526	21724977	1.92	0	21723826	21724475	1.27	0	"histone 1, H3h"	319152	H3-291
Hist1h4j	chr13	+	21741876	21742625	1.41	0.00805	21742276	21742625	1.45	0.00418	"histone 1, H4j"	319159	-
Hist1h2ak	chr13	-	21760721	21761270	1.92	0	21760721	21761070	1.32	0.00946	"histone 1, H2ak"	319169	-
Hist1h2bn	chr13	+	21760721	21761270	1.92	0	21760721	21761070	1.32	0.00946	"histone 1, H2bn"	319187	-
Hist1h4k	chr13	-	21760721	21761270	1.92	0	21760721	21761070	1.32	0.00946	"histone 1, H4k"	319160	-
Hist1h2bj	chr13	+	22048744	22049103	1.41	0.00805	22047844	22049103	1.23	0.00877	"histone 1, H2bj"	319183	-
Hist1h4i	chr13	-	22048744	22049103	1.41	0.00805	22047844	22049103	1.23	0.00877	"histone 1, H4i"	319158	-
Hist1h2af	chr13	+	23537294	23539343	2.2	0.000277	23537294	23539052	1.86	0	"histone 1, H2af"	319173	H2a-221
Hist1h3g	chr13	+	23537294	23539343	2.2	0.000277	23537294	23539052	1.86	0	"histone 1, H3g"	97908	H3.1-221|M32460
Hist1h4h	chr13	+	23537294	23539343	2.2	0.000277	23537294	23539052	1.86	0	"histone 1, H4h"	69386	1700024H08Rik|MGC41466
Hist1h3g	chr13	+	23542519	23542968	1.55	0.0042	23541519	23543480	1.09	0	"histone 1, H3g"	97908	H3.1-221|M32460
Hist1h1d	chr13	+	23558658	23559207	1.36	0.00679	23558658	23559620	1.36	0.00725	"histone 1, H1d"	14957	H1.3|H1D|H1f3|H1s-4
Hist1h4f	chr13	-	23558658	23559207	1.36	0.00679	23558658	23559620	1.36	0.00725	"histone 1, H4f"	319157	-
Hist1h3e	chr13	-	23569880	23570129	3.52	0	23569880	23570129	3.18	0	"histone 1, H3e"	319151	H3-f
Hist1h2ad	chr13	+	23578210	23578862	1.69	0	23578610	23578959	1.36	0.00725	"histone 1, H2ad"	319165	-
Hist1h2ae	chr13	-	23578210	23578862	1.69	0	23578610	23578959	1.36	0.00725	"histone 1, H2ae"	319166	1190022L06
Hist1h2bg	chr13	+	23578210	23578862	1.69	0	23578610	23578959	1.36	0.00725	"histone 1, H2bg"	319181	-
Hist1h3d	chr13	+	23578210	23578862	1.69	0	23578610	23578959	1.36	0.00725	"histone1, H3d"	319149	H3-b
Hist1h4d	chr13	+	23588816	23589165	1.41	0.00805	23588516	23589165	1.36	0.00725	"histone 1, H4d"	319156	-
Hist1h2ab	chr13	+	23758617	23759966	1.55	0.00393	23758517	23759071	1.32	0.00946	"histone 1, H2ab"	319172	H2A.1|H2a-53
Hist1h3b	chr13	+	23758617	23759966	1.55	0.00393	23758517	23759071	1.32	0.00946	"histone 1, H3b"	319150	H3-53
Exoc2	chr13	-	30980978	30981627	2.72	0	30980978	30981627	1.95	0	exocyst complex component 2	66482	2410030I24Rik|AI648199|Sec5|Sec5l1
LOC432743	chr13	+	30980978	30981627	2.72	0	30980978	30981627	1.95	0	hypothetical gene supported by AK077314	432743	-
Foxq1	chr13	+	31564951	31565300	1.64	0.00331	31564951	31565300	1.36	0.00725	forkhead box Q1	15220	HFH-1|Hfh1|Hfh1l|sa
Tubb2b	chr13	-	34137969	34138318	1.74	0.00253	34137869	34138318	1.5	0.00294	"tubulin, beta 2b"	73710	2410129E14Rik
Prpf4b	chr13	+	34881711	34882060	2.58	0	34881711	34882060	2.09	0	PRP4 pre-mRNA processing factor 4 homolog B (yeast)	19134	2610037H07|MGC5960|Prp4|Prp4k|Prpk|cbp143
Hivep1	chr13	+	42063827	42064176	1.41	0.00805	42063827	42064176	1.32	0.00946	human immunodeficiency virus type I enhancer binding protein 1	110521	Cryabp1
Edn1	chr13	+	42312197	42312551	2.02	0.000699	42312197	42312551	1.86	0	endothelin 1	13614	ET-1|preproET
Susd3	chr13	-	49262943	49263294	1.41	0.00805	49262443	49263592	0.86	0	sushi domain containing 3	66329	1700017I11Rik|2810440J20Rik
Fgd3	chr13	-	49320795	49321144	1.83	0.00184	49320895	49321344	1.68	0.00144	"FYVE, RhoGEF and PH domain containing 3"	30938	5830461L01Rik|ZFYVE5
Bicd2	chr13	+	49352935	49353284	1.55	0.0042	49352835	49353284	1.23	0.00877	bicaudal D homolog 2 (Drosophila)	76895	0610027D24Rik|1110005D12Rik|KIAA0699|mKIAA0699
Cks2	chr13	+	51658086	51658535	1.92	0.00102	51657986	51658535	1.27	0.00602	CDC28 protein kinase regulatory subunit 2	66197	1110038L14Rik|CKSHS2
Syk	chr13	+	52609164	52609613	1.92	0.00102	52609164	52609515	2.04	0	spleen tyrosine kinase	20963	-
Rnf44	chr13	-	54703808	54704157	1.55	0.0042	54703708	54704057	1.41	0.00544	ring finger protein 44	105239	AI854545|mKIAA1100
2610524G07Rik	chr13	+	55328071	55328420	1.92	0.00102	55328071	55328531	2.54	0	RIKEN cDNA 2610524G07 gene	66494	Preli
Dok3	chr13	-	55537610	55538359	1.88	0	55537410	55538359	1.82	0	docking protein 3	27261	AI450713|Dokl
BC027057	chr13	-	56191062	56191411	2.81	0	56191062	56191411	2.63	0	cDNA sequence BC027057	212937	MGC32345|MGC37193
Hbld2	chr13	-	59779535	59779884	1.41	0.00805	59779535	59779884	1.32	0.00946	HESB like domain containing 2	69046	1810010A06Rik
6720457D02Rik	chr13	-	62567873	62568322	1.78	0.00198	62567973	62568322	1.41	0.00544	RIKEN cDNA 6720457D02 gene	77117	-
Fancc	chr13	-	63440866	63441215	1.59	0.00368	63440766	63441325	1.64	0	"Fanconi anemia, complementation group C"	14088	BB116513|Facc
1110018J18Rik	chr13	-	64326187	64326536	1.55	0.0042	64326187	64326536	1.41	0.00544	RIKEN cDNA 1110018J18 gene	66129	AI849003
Hiatl1	chr13	-	65128585	65129442	1.97	0.000795	65128585	65129442	1.27	0.00602	hippocampus abundant transcript-like 1	66631	5730414C17Rik|AU045608|AW539692
Rsl1	chr13	+	67672046	67672395	1.83	0.00184	67672146	67672595	1.36	0.00725	regulator of sex limited protein-Slp 1	380855	MGC118400|rslcan-9
Zfp456	chr13	-	67874680	67875029	2.02	0.000699	67874580	67875029	1.36	0.00725	zinc finger protein 456	408065	BC065418|MGC73892|Rslcan-13
Zfp87	chr13	-	68025186	68025539	1.88	0.00102	68025186	68025539	1.5	0.00294	zinc finger protein 87	170763	2210039O17Rik|4631412O18Rik|KRAB4|MGC25780|Mzf22|Zfp72
AL022779	chr13	+	74403721	74404570	2.16	0	74403621	74404770	1.36	0	expressed sequence AL022779	105246	-
Trip13	chr13	-	74403721	74404570	2.16	0	74403621	74404770	1.36	0	thyroid hormone receptor interactor 13	69716	2410002G23Rik|D13Ertd328e
BC012278	chr13	-	74959902	74961359	2.16	0	74959902	74960852	1.86	0	cDNA sequence BC012278	235956	MGC18736
AK129128	chr13	+	76564609	76564958	2.11	0.000678	76564609	76564958	2	0	cDNA sequence AK129128	218343	KIAA0372|mKIAA0372
Arsk	chr13	-	76564609	76564958	2.11	0.000678	76564609	76564958	2	0	arylsulfatase K	77041	2810429K17Rik|4833414G15Rik
Mef2c	chr13	+	84049452	84049901	3.14	0	84049452	84049901	2.82	0	myocyte enhancer factor 2C	17260	5430401D19Rik|9930028G15Rik|AV011172
C130071C03Rik	chr13	+	84210931	84211980	1.83	0.00184	84211531	84211881	1.54	0.00239	RIKEN cDNA C130071C03 gene	320203	-
Serinc5	chr13	+	93711549	93711898	1.78	0.00198	93711549	93711898	1.64	0.00145	serine incorporator 5	218442	A130038L21Rik|AIGP3|TPO1
F2rl1	chr13	-	96635015	96635368	2.91	0	96635015	96635368	3.18	0	coagulation factor II (thrombin) receptor-like 1	14063	Gpcr11|PAR-2|Par2
Fcho2	chr13	-	99913858	99914807	1.55	0.0042	99914158	99914807	1.54	0.00239	FCH domain only 2	218503	5832424M12Rik|AA387320
LOC667800	chr13	+	99913858	99914807	1.55	0.0042	99914158	99914807	1.54	0.00239	similar to 40S ribosomal protein S17	667800	-
Birc1b	chr13	-	101302099	101302448	2.39	0	101302099	101302448	2.09	0	baculoviral IAP repeat-containing 1b	17948	Naip-rs6|Naip2
Birc1f	chr13	-	101417623	101417972	2.25	0.000325	101417623	101417972	1.59	0.00245	baculoviral IAP repeat-containing 1f	17952	Naip-rs4|Naip-rs4A|Naip6
Birc1g	chr13	-	101417623	101417972	2.25	0.000325	101417623	101417972	1.59	0.00245	baculoviral IAP repeat-containing 1g	53880	Naip-rs4B|Naip6|Naip7
Slc30a5	chr13	-	101924667	101925025	1.88	0.00102	101924667	101925025	1.5	0.00294	"solute carrier family 30 (zinc transporter), member 5"	69048	1810010K08Rik|AF233321|ZNT5|ZTL1|ZnT-5|Zntl1
Cd180	chr13	+	103813719	103814168	2.2	0.000277	103813719	103814068	1.95	0	CD180 antigen	17079	F630107B15|Ly78|RP105
Adamts6	chr13	+	105406866	105407618	1.92	0.00102	105406866	105407415	1.91	0	"a disintegrin-like and metallopeptidase (reprolysin type) with thrombospondin type 1 motif, 6"	108154	5031426K13|A930019D11Rik|ADAM-TS6
Ipo11	chr13	-	107967802	107968353	1.78	0.00198	107967802	107968353	1.64	0.00145	importin 11	76582	1700081H05Rik|2510001A17Rik|AI314624|AW555235|E330021B14Rik|Ranbp11
Ppap2a	chr13	+	113920621	113921070	1.78	0.00198	113920621	113921270	1.36	0.00725	phosphatidic acid phosphatase 2a	19012	Hic53|Hpic53|LPP-1|LPP1|mPAP
Ndufs4	chr13	-	115508871	115509720	1.41	0.00521	115508371	115509224	1.5	0.00107	NADH dehydrogenase (ubiquinone) Fe-S protein 4	17993	C1-18k
Parp8	chr13	-	118147525	118147887	2.91	0	118147525	118147887	2.82	0	"poly (ADP-ribose) polymerase family, member 8"	52552	2810430O08Rik|D13Ertd275e
Fhit	chr14	-	9246852	9247401	2.28	0	9246552	9247301	2.03	0	fragile histidine triad gene	14198	AW045638|Fra14A2
Gng2	chr14	-	18767606	18768355	1.87	0.00102	18767606	18768155	1.49	0.00294	"guanine nucleotide binding protein (G protein), gamma 2 subunit"	14702	1110003P13Rik|82
Dnajc9	chr14	-	19177460	19177913	1.42	0.00597	19177160	19178522	1.4	0.00544	"DnaJ (Hsp40) homolog, subfamily C, member 9"	108671	5330419I01Rik|AU020082
Dnajc9	chr14	-	19182146	19182495	1.78	0.00184	19182146	19182495	1.53	0.00239	"DnaJ (Hsp40) homolog, subfamily C, member 9"	108671	5330419I01Rik|AU020082
Mrps16	chr14	-	19182146	19182495	1.78	0.00184	19182146	19182495	1.53	0.00239	mitochondrial ribosomal protein S16	66242	1500011E11Rik|Mprs16
Usp54	chr14	-	19350474	19350935	2.15	0.000277	19350574	19351030	2.43	0	ubiquitin specific peptidase 54	78787	4930429G18Rik|AI115571
Myst4	chr14	+	20288869	20289518	1.6	0.00331	20289069	20289518	1.31	0.00946	MYST histone acetyltransferase monocytic leukemia 4	54169	AI507552|B130044K16Rik|Morf|mKIAA0383|qkf|querkopf
Dusp13	chr14	-	20539756	20540114	1.46	0.0052	20539756	20540114	1.94	0	dual specificity phosphatase 13	27389	Gm1203|LMW-DSP6|MDSP|TMDP|TS-DSP6
Samd8	chr14	+	20539756	20540114	1.46	0.0052	20539756	20540114	1.94	0	sterile alpha motif domain containing 8	67630	1110053F04Rik|1700010P07Rik|MGC118303
Anxa11	chr14	+	24674755	24675104	1.96	0.000699	24674755	24675104	1.53	0.00239	annexin A11	11744	A830099O17Rik|Anx11
Prkcd	chr14	-	29449310	29449559	2.42	0	29449310	29449559	1.85	0.0017	"protein kinase C, delta"	18753	AI385711|D14Ertd420e|PKC[d]|PKCdelta|Pkcd
Prkcd	chr14	-	29455131	29455580	1.42	0.00597	29455231	29455580	1.31	0.00946	"protein kinase C, delta"	18753	AI385711|D14Ertd420e|PKC[d]|PKCdelta|Pkcd
Prkcd	chr14	-	29456631	29456881	1.64	0.00666	29456631	29456881	1.76	0.00128	"protein kinase C, delta"	18753	AI385711|D14Ertd420e|PKC[d]|PKCdelta|Pkcd
Sh3bp5	chr14	-	30265220	30265569	2.01	0.00078	30265220	30265569	2.03	0	SH3-domain binding protein 5 (BTK-associated)	24056	AI606498|Sab
Ncoa4	chr14	+	30988850	30989199	1.51	0.0042	30988850	30989299	1.44	0.00418	nuclear receptor coactivator 4	27057	4432406M01Rik|AI227008|MGC103382|Rfg
Tspan14	chr14	-	39875770	39876119	1.74	0.00198	39875970	39876419	1.31	0.00946	tetraspanin 14	52588	AA958793|D14Ertd226e|MGC36554|Tm4sf14
Rnase6	chr14	+	50050808	50050957	3.06	0	50050808	50050957	3.33	0	"ribonuclease, RNase A family, 6"	78416	9530043P15Rik
Zfp219	chr14	-	50944805	50945160	2.38	0	50944805	50945654	1.98	0	zinc finger protein 219	69890	2010302A17Rik
Hnrpc	chr14	-	51026170	51026619	1.92	0.000795	51026270	51026619	1.8	0.000468	heterogeneous nuclear ribonucleoprotein C	15381	AL022939|D14Wsu171e|Hnrnpc|Hnrpc1|Hnrpc2|hnRNPC1|hnRNPC2|hnrnp-C
5730589K01Rik	chr14	+	51201244	51201693	1.51	0.0042	51200544	51201793	1.49	0.00107	RIKEN cDNA 5730589K01 gene	268741	A630040M18|AA410149|LCP1
Rab2b	chr14	-	51201244	51201693	1.51	0.0042	51200544	51201793	1.49	0.00107	"RAB2B, member RAS oncogene family"	76338	1500012D09Rik|A230002G14|D530043M21Rik
A630038E17Rik	chr14	+	53032728	53033077	1.87	0.00102	53032728	53033077	1.53	0.00239	RIKEN cDNA A630038E17 gene	219065	A430070I15|MGC130495|TRDC|TRDV4
Slc7a7	chr14	-	53371534	53371983	2.06	0.000678	53371534	53371983	1.49	0.00294	"solute carrier family 7 (cationic amino acid transporter, y+ system), member 7"	20540	AI790233|my+lat1
Mmp14	chr14	+	53380774	53381123	1.78	0.00184	53380574	53381123	1.98	0	matrix metallopeptidase 14 (membrane-inserted)	17387	AI325305|MT-MMP-1|MT1-MMP
Mrpl52	chr14	+	53380774	53381123	1.78	0.00184	53380574	53381123	1.98	0	mitochondrial ribosomal protein L52	68836	1110047B07Rik
Lrp10	chr14	+	53417401	53417759	1.6	0.00331	53417401	53417759	1.67	0.00144	low-density lipoprotein receptor-related protein 10	65107	Lrp9
1700123O20Rik	chr14	+	53640976	53641325	1.96	0.000699	53641076	53641425	1.44	0.00418	RIKEN cDNA 1700123O20 gene	58248	MNCb-2990
Acin1	chr14	-	53640976	53641325	1.96	0.000699	53641076	53641425	1.44	0.00418	apoptotic chromatin condensation inducer 1	56215	2610036I19Rik|2610510L13Rik|ACN|Acinus|C79325|acinusL|acinusS|mKIAA0670
Wdr23	chr14	+	54514152	54515001	1.78	0.00184	54514152	54514601	1.31	0.00946	WD repeat domain 23	28199	0710008A13Rik|C76035|D14Ucla1|GLO14
1500005A01Rik	chr14	-	54544210	54544759	2.33	0	54544210	54544759	2.03	0	RIKEN cDNA 1500005A01 gene	85308	Cgi112
Psme2	chr14	-	54544210	54544759	2.33	0	54544210	54544759	2.03	0	"proteasome (prosome, macropain) 28 subunit, beta"	19188	AA589371|AI788882|PA28b
Psme2b-ps	chr14	-	54544210	54544759	2.33	0	54544210	54544759	2.03	0	"protease (prosome, macropain) 28 subunit beta B, pseudogene"	19191	PA28b-p|PA28b2|Psme2-like|Psme2b
Rnf31	chr14	+	54544210	54544759	2.33	0	54544210	54544759	2.03	0	ring finger protein 31	268749	AL033293|BC031509|Flj10111|Paul|mFLJ00217
Isgf3g	chr14	+	54558030	54558379	1.87	0.00102	54558030	54558379	1.49	0.00294	interferon dependent positive acting transcription factor 3 gamma	16391	Irf-9|p48
Gmpr2	chr14	+	54626256	54627105	2.15	0.000277	54626156	54627105	1.58	0.00245	guanosine monophosphate reductase 2	105446	1810008P16Rik|5730544D12Rik|AA959850
Nedd8	chr14	-	54626256	54627105	2.15	0.000277	54626156	54627105	1.58	0.00245	"neural precursor cell expressed, developmentally down-regulated gene 8"	18002	Rub1
Rabggta	chr14	-	54678497	54678848	2.88	0	54678497	54678848	3.11	0	"Rab geranylgeranyl transferase, a subunit"	56187	gm
Cbln3	chr14	-	54840089	54840438	3.33	0	54840089	54840438	2.75	0	cerebellin 3 precursor protein	56410	-
4930548G07Rik	chr14	+	55622107	55622456	1.51	0.0042	55622007	55622356	1.31	0.00946	RIKEN cDNA 4930548G07 gene	75339	1500035L22Rik|AU040635
Lats2	chr14	-	56700637	56700986	2.19	0.000325	56700637	56701387	1.62	0.00145	large tumor suppressor 2	50523	4932411G09Rik|AV277261|AW228608
Fgf9	chr14	+	57025883	57026232	2.38	0	57025883	57026232	2.12	0	fibroblast growth factor 9	14180	-
Phf11	chr14	-	58251376	58251826	2.38	0	58251476	58251826	2.03	0	PHD finger protein 11	219131	4933417L10Rik
Cab39l	chr14	+	58392840	58393193	1.46	0.0052	58392840	58393193	1.31	0.00946	calcium binding protein 39-like	69008	1500031K13Rik|2810425O13Rik|4930520C08Rik|AA589432|MO2L
Cdadc1	chr14	-	58552181	58552934	2.19	0	58552181	58552934	1.58	0.00245	cytidine and dCMP deaminase domain containing 1	71891	2310010M10Rik|AI449174|AI463398|BB130816|NYD-SP15
Ints6	chr14	-	61715672	61716023	2.74	0	61715672	61716225	2.12	0	integrator complex subunit 6	18130	2900075H24Rik|AI480962|DICE1|Ddx26|HDB|Notch2l
Blk	chr14	-	62372697	62373057	1.83	0.00102	62372497	62372946	1.4	0.00544	B lymphoid kinase	12143	-
D14Ertd231e	chr14	+	63904021	63904370	2.06	0.000678	63904021	63904370	1.49	0.00294	"DNA segment, Chr 14, ERATO Doi 231, expressed"	210925	BC028953
Hmbox1	chr14	-	63904021	63904370	2.06	0.000678	63904021	63904370	1.49	0.00294	homeobox containing 1	219150	AI451877|AI604847|F830020C16Rik
Elp3	chr14	-	64546880	64547229	2.1	0.000759	64546671	64547229	1.67	0.00144	elongation protein 3 homolog (S. cerevisiae)	74195	2610507P14Rik
Bnip3l	chr14	-	65962999	65963348	1.78	0.00184	65962999	65963348	1.89	0	BCL2/adenovirus E1B interacting protein 3-like	12177	C86132|D14Ertd719e|Nip3L|Nix
1110060D06Rik	chr14	-	66717739	66718197	2.15	0.000277	66717539	66718197	1.35	0.00725	RIKEN cDNA 1110060D06 gene	68813	AI666732|AI956923
Pdlim2	chr14	-	68910456	68910812	3.24	0	68910456	68910812	3.29	0	PDZ and LIM domain 2	213019	MGC37634|Slim|mystique
Polr3d	chr14	-	69178177	69178626	1.55	0.00368	69178177	69178626	1.35	0.00725	polymerase (RNA) III (DNA directed) polypeptide D	67065	2810426M17Rik|44kDa|AI326118|AW489084|BN51T|RPC4|TSBN51
Nudt15	chr14	-	72258732	72259481	1.37	0.00805	72258732	72259081	1.44	0.00418	nudix (nucleoside diphosphate linked moiety X)-type motif 15	214254	6530403O17|A730068G11Rik|MTH2
Lcp1	chr14	+	73910249	73911422	1.83	0.00102	73910549	73910998	1.44	0.00418	lymphocyte cytosolic protein 1	18826	AW536232|D14Ertd310e|L-fimbrin|Pls2
4933415L06Rik	chr14	+	75768576	75769026	1.74	0.00198	75767676	75769127	2.16	0	RIKEN cDNA 4933415L06 gene	108811	MGC106895
Mtrf1	chr14	+	78127517	78127877	1.74	0.00198	78127517	78127877	1.67	0.00144	mitochondrial translational release factor 1	211253	A830062K05Rik|MGC19099
Narg1l	chr14	-	78127517	78127877	1.74	0.00198	78127517	78127877	1.67	0.00144	NMDA receptor regulated 1-like	66897	1300019C06Rik
Elf1	chr14	+	78249591	78250540	1.92	0.000795	78249591	78250540	2.16	0	E74-like factor 1	13709	Elf-1|Sts1|mElf-1|p70
Commd6	chr14	-	100525951	100526400	1.96	0	100525951	100526308	1.67	0.00144	COMM domain containing 6	66200	1110059J08Rik|1700063H17Rik
Kctd12	chr14	-	101869687	101870044	2.47	0	101869687	101870044	2.12	0	potassium channel tetramerisation domain containing 12	239217	6430514H16|AU046135|AW538430|Pfet1|Pfetin
Cldn10	chr14	-	117722198	117722547	2.24	0	117722198	117722547	1.49	0.00294	claudin 10	58187	6720456I16Rik|D14Ertd728e
Cldn10	chr14	+	117989487	117989836	2.51	0	117989487	117989836	1.8	0.000468	claudin 10	58187	6720456I16Rik|D14Ertd728e
Rap2a	chr14	+	119612390	119612840	2.28	0	119612390	119612840	1.8	0.000468	RAS related protein 2a	76108	5830461H18Rik
Phgdhl1	chr14	+	121012136	121012787	2.28	0	121012236	121012894	2.03	0	phosphoglycerate dehydrogenase like 1	68889	1190008A14Rik|AW554959
Phgdhl1	chr14	+	121013536	121013885	2.42	0	121013536	121013885	1.62	0.00145	phosphoglycerate dehydrogenase like 1	68889	1190008A14Rik|AW554959
Gpr18	chr14	-	121051508	121052357	3.52	0	121051508	121052467	3.06	0	G protein-coupled receptor 18	110168	-
Tmtc4	chr14	-	122118470	122118919	1.69	0.00253	122118570	122118919	1.44	0.00418	transmembrane and tetratricopeptide repeat containing 4	70551	4930403J22Rik|5730419O14Rik
AW549877	chr15	-	3945867	3946619	1.26	0	3945867	3946316	1.36	0.00946	expressed sequence AW549877	106064	AI195826
Rpl37	chr15	+	5063509	5063858	1.46	0.00805	5063409	5063958	1.36	0.00423	ribosomal protein L37	67281	3110005M08Rik
Rpl37	chr15	+	5064409	5064762	2.57	0	5064209	5064762	1.5	0.00195	ribosomal protein L37	67281	3110005M08Rik
4921505C17Rik	chr15	+	6652845	6653197	1.55	0.0052	6652945	6653502	1.74	0.00144	RIKEN cDNA 4921505C17 gene	78757	6030405M08Rik|AVO3|AW492497|D530039E11Rik|RICTOR
C230086A09Rik	chr15	-	9692752	9693006	2.57	0	9692752	9693301	1.41	0.00725	RIKEN cDNA C230086A09 gene	320277	-
Zfr	chr15	+	12061927	12062276	2.23	0.000759	12062027	12062376	2.07	0	zinc finger RNA binding protein	22763	C920030H05Rik
Zfp706	chr15	-	36951122	36951378	2.53	0	36951122	36951378	2.4	0	zinc finger protein 706	68036	3110006P09Rik|AA793007|AW536850|C77232
Ebag9	chr15	+	44450028	44450388	2.19	0.000678	44449928	44450282	2.44	0	estrogen receptor-binding fragment-associated gene 9	55960	MGC118417|Rcas1
LOC665052	chr15	-	44450028	44450388	2.19	0.000678	44449928	44450282	2.44	0	hypothetical protein LOC665052	665052	-
Derl1	chr15	-	57722551	57722900	1.75	0.00293	57722551	57723509	1.32	0.00602	"Der1-like domain family, member 1"	67819	1110021N07Rik|AI195141|AW551338|Derlin-1
E430025E21Rik	chr15	-	59183060	59183409	1.94	0.00102	59183060	59183409	2.49	0	RIKEN cDNA E430025E21 gene	223593	AL022848|C76463|MGC31278|mKIAA0196
Pvt1	chr15	+	62007415	62007864	1.55	0.0052	62007315	62007777	1.79	0.000822	plasmacytoma variant translocation 1	19296	Mis-1|Mlvi-1|Pvt-1
St3gal1	chr15	-	66946320	66946769	2.28	0.000277	66946320	66946769	1.88	0.000468	"ST3 beta-galactoside alpha-2,3-sialyltransferase 1"	20442	AI467004|MGC90735|ST3GalI|Siat4|Siat4a|St3gal-1
1810044A24Rik	chr15	-	72888356	72888605	2.67	0	72888356	72888605	2.58	0	RIKEN cDNA 1810044A24 gene	76510	2900005P22Rik|4632408O18Rik|Ibp|KIAA1882|Nibp|mKIAA1882
Slc45a4	chr15	-	73454550	73455199	1.51	0.00597	73454150	73454999	1.41	0.00725	"solute carrier family 45, member 4"	106068	9330175B01Rik|AW552276
Gpaa1	chr15	+	76158235	76158584	2.28	0.000277	76157835	76158584	1.5	0.00418	GPI anchor attachment protein 1	14731	C80044|mGAA1
Bop1	chr15	-	76304939	76305296	2.23	0.000759	76304939	76305296	1.83	0.000435	block of proliferation 1	12181	AU020183|AW146150|D18861|Erb1p|Kiaa0124|mKIAA0124
Hsf1	chr15	+	76304939	76305296	2.23	0.000759	76304939	76305296	1.83	0.000435	heat shock factor 1	15499	AA960185
Commd5	chr15	+	76726847	76727896	1.6	0.0042	76726847	76727196	1.5	0.00418	COMM domain containing 5	66398	2310065H03Rik|AI854466|D15Ertd81e|Hcarg
Rpl8	chr15	+	76726847	76727896	1.6	0.0042	76726847	76727196	1.5	0.00418	ribosomal protein L8	26961	-
Txn2	chr15	-	77755785	77756334	2.28	0.000277	77755885	77756434	2.35	0	thioredoxin 2	56551	2510006J11Rik|AI788873
Txn2	chr15	-	77758985	77759334	2.57	0	77758985	77759334	2.72	0	thioredoxin 2	56551	2510006J11Rik|AI788873
Ncf4	chr15	+	78071938	78072287	2.14	0.00078	78071938	78072287	2.21	0	neutrophil cytosolic factor 4	17972	AI451400|p40phox
Sh3bp1	chr15	+	78727590	78727939	1.94	0.00102	78727590	78728039	1.32	0.00602	SH3-domain binding protein 1	20401	3BP-1
Gtpbp1	chr15	+	79517097	79517846	1.7	0.00331	79516997	79517846	1.5	0.00418	GTP binding protein 1	14904	AL022987|AW045683|C85212|GP-1|Gtpbp
Josd1	chr15	-	79517097	79517846	1.7	0.00331	79516997	79517846	1.5	0.00418	Josephin domain containing 1	74158	1300006C06Rik|MGC101975|MGC6306|mKIAA0063
Slc25a17	chr15	-	81188252	81188601	2.14	0.00078	81188252	81188601	1.88	0.000468	"solute carrier family 25 (mitochondrial carrier, peroxisomal membrane protein), member 17"	20524	34kDa|47kDa|PMP34|Pmp47
Dnajb7	chr15	-	81237278	81237527	2.09	0	81237278	81237527	2.4	0	"DnaJ (Hsp40) homolog, subfamily B, member 7"	57755	4933424H20Rik|Dj5|mDj5
Tob2	chr15	-	81687172	81687521	2.28	0.000277	81687172	81687929	1.88	0.000468	"transducer of ERBB2, 2"	57259	2900090N22Rik|4930545K18Rik|AV071822|mKIAA1663
Csdc2	chr15	+	81761340	81761589	2.77	0	81761340	81761589	2.82	0	"cold shock domain containing C2, RNA binding"	105859	AI415250|AI481750|Pippin
C920005C14Rik	chr15	+	82165720	82166069	1.65	0.00368	82165720	82166069	1.41	0.00725	RIKEN cDNA C920005C14 gene	338368	-
Naga	chr15	-	82165720	82166069	1.65	0.00368	82165720	82166069	1.41	0.00725	"N-acetyl galactosaminidase, alpha"	17939	-
Alg12	chr15	-	88646961	88647310	1.75	0.00293	88646861	88647210	1.36	0.00946	"asparagine-linked glycosylation 12 homolog (yeast, alpha-1,6-mannosyltransferase)"	223774	ECM39|MGC29374
Creld2	chr15	+	88646961	88647310	1.75	0.00293	88646861	88647210	1.36	0.00946	cysteine-rich with EGF-like domains 2	76737	5730592L21Rik|C85758
Ecgf1	chr15	-	89201438	89201787	1.8	0.00253	89201438	89201787	1.83	0.000435	endothelial cell growth factor 1 (platelet-derived)	72962	2900072D10Rik|PD-ECGF|PDECGF|Pdgfec
Tmem16f	chr15	+	95618626	95618975	1.51	0.00597	95618626	95619175	1.27	0.00877	transmembrane protein 16F	105722	2900059G15Rik|AA407480|AW554778|F730003B03Rik
BC038822	chr15	+	97189007	97189356	1.99	0.00102	97189007	97189356	2.11	0	cDNA sequence BC038822	239647	MGC47262
Pp11r	chr15	-	97549134	97549483	1.46	0.00805	97549134	97549583	1.36	0.00946	placental protein 11 related	19011	Tcl-30
Lalba	chr15	-	98311967	98312416	2.33	0.000325	98311867	98312216	2.54	0	"lactalbumin, alpha"	16770	AW208827
Lalba	chr15	-	98311967	98312416	2.33	0.000325	98312367	98312817	1.69	0.00145	"lactalbumin, alpha"	16770	AW208827
4930415O20Rik	chr15	+	98395520	98396169	1.55	0.00317	98395120	98395969	1.6	0	RIKEN cDNA 4930415O20 gene	73863	-
Ccnt1	chr15	-	98395520	98396169	1.55	0.00317	98395120	98395969	1.6	0	cyclin T1	12455	2810478G24Rik|AI115585|CycT1
Ddx23	chr15	-	98490254	98491103	2.33	0.000325	98490254	98490606	2.4	0	DEAD (Asp-Glu-Ala-Asp) box polypeptide 23	74351	4921506D17Rik
Tuba6	chr15	+	98858283	98858632	2.62	0	98858383	98858732	1.93	0	"tubulin, alpha 6"	22146	M[a]6
Tegt	chr15	+	99220792	99221441	1.51	0	99220892	99221441	1.5	0.00195	testis enhanced gene transcript	110213	5031406P05Rik
Mettl7a	chr15	+	100132100	100132549	2.23	0	100132200	100132549	2.25	0	methyltransferase like 7A	70152	2210414H16Rik|3300001H21Rik|Aam-B|UbiE1
Dazap2	chr15	+	100442979	100443328	1.8	0.00253	100442979	100443328	1.88	0.000468	DAZ associated protein 2	23994	AI314727|Brbp|MGC25222|Prtb|gt6-12|mKIAA0058
LOC668214	chr15	-	100442979	100443328	1.8	0.00253	100442979	100443328	1.88	0.000468	hypothetical protein LOC668214	668214	-
1110034O07Rik	chr15	+	102032631	102032980	1.89	0.00184	102032631	102032980	1.55	0.00294	RIKEN cDNA 1110034O07 gene	68744	AW548228
1110034O07Rik	chr15	+	102036031	102036480	1.99	0.00102	102036031	102036380	1.46	0.00544	RIKEN cDNA 1110034O07 gene	68744	AW548228
Myg1	chr15	+	102159523	102159872	1.65	0.00368	102159623	102159972	1.41	0.00725	melanocyte proliferating gene 1	60315	0610023A07Rik|2810433J21Rik|5830429P19Rik|AI325965|Gamm1
Sp1	chr15	+	102233274	102234023	2.28	0.000277	102233274	102233723	1.41	0.00725	trans-acting transcription factor 1	20683	1110003E12Rik|AA450830|AI845540|Sp1-1
Prr13	chr15	+	102286943	102287292	2.38	0	102286943	102287292	1.5	0.00418	proline rich 13	66151	1110020C13Rik|2010324E22Rik
Map3k12	chr15	-	102346882	102347331	1.31	0.0091	102346882	102347231	1.5	0.00418	mitogen activated protein kinase kinase kinase 12	26404	DLK|MUK|Zpk
Tarbp2	chr15	+	102346882	102347331	1.31	0.0091	102346882	102347231	1.5	0.00418	TAR (HIV) RNA binding protein 2	21357	Prbp
Atf7	chr15	-	102453051	102453400	1.7	0.00331	102452951	102453400	1.93	0	activating transcription factor 7	223922	1110012F10Rik|9430065F09Rik|AI549878|C130020M04Rik|MGC31554
Calcoco1	chr15	-	102550053	102550402	1.6	0.0042	102550053	102550402	1.6	0.00239	calcium binding and coiled coil domain 1	67488	1810009B06Rik|Cocoa|KIAA1536|mKIAA1536
Hoxc10	chr15	+	102791879	102792235	2.09	0.000699	102791879	102792235	2.25	0	homeo box C10	209448	AI506621|Hox-3.6
Gpr84	chr15	-	103138422	103138971	2.23	0.000759	103138522	103139073	1.6	0	G protein-coupled receptor 84	80910	EX33
Zfp385	chr15	-	103161711	103162060	2.57	0	103161711	103162060	2.68	0	zinc finger protein 385	29813	Hzf
Nckap1l	chr15	+	103281647	103281996	2.43	0	103281647	103281996	1.93	0	NCK associated protein 1 like	105855	4930568P13Rik|AI463083|Hemp1
Zfp263	chr16	+	3659008	3659357	1.95	0.000795	3658508	3659357	1	0.00564	zinc finger protein 263	74120	1200014J04Rik|AI326880|AU020888|NT2
Zfp597	chr16	-	3787052	3787801	1.07	0.00672	3787052	3787401	1.68	0.00144	zinc finger protein 597	71063	4933407K12Rik|AI462383|AI666357|MGC118564
Carhsp1	chr16	-	8589407	8589756	2.87	0	8589407	8589756	2.27	0	calcium regulated heat stable protein 1	52502	1200011K09Rik|Crhsp-24|D16Ertd465e|MGC101919
Nubp1	chr16	+	10325777	10326026	1.71	0.00729	10325477	10326026	1.36	0.00725	nucleotide binding protein 1	26425	-
C2ta	chr16	+	10401505	10401854	2.32	0	10401605	10402054	2.4	0	class II transactivator	12265	CIITA|MGC130299
4921513D23Rik	chr16	-	14072787	14073136	2.69	0	14072787	14073136	2.58	0	RIKEN cDNA 4921513D23 gene	223989	BC031575|E030019O05|KIAA0430|LKAP|MGC36956|mKIAA0430
Nde1	chr16	+	14072787	14073136	2.69	0	14072787	14073136	2.58	0	nuclear distribution gene E homolog 1 (A nidulans)	67203	2810027M15Rik|AU042936|AW822251|Nude|mNudE
Abcc1	chr16	+	14275487	14275836	1.62	0.00331	14275587	14275836	2.04	0	"ATP-binding cassette, sub-family C (CFTR/MRP), member 1"	17250	Abcc1a|Abcc1b|MRP|Mdrap|Mrp1
2310008H04Rik	chr16	-	15986773	15987135	1.9	0.00102	15986773	15987135	1.77	0.000435	RIKEN cDNA 2310008H04 gene	224008	MGC115787|MGC30630
Gm603	chr16	+	17122680	17123029	1.48	0.0052	17122680	17123129	1.5	0.00294	"gene model 603, (NCBI)"	239731	Gm1759|mKIAA1666
Pik4ca	chr16	-	17320177	17320536	2.08	0.000678	17319877	17320427	1.59	0.00245	"phosphatidylinositol 4-kinase, catalytic, alpha polypeptide"	224020	-
Snap29	chr16	+	17320177	17320536	2.08	0.000678	17319877	17320427	1.59	0.00245	synaptosomal-associated protein	67474	1300018G05Rik|AI891940|AU020222|BB131856|Gs32
Pik4ca	chr16	-	17322677	17323031	2.87	0	17322677	17323031	3.04	0	"phosphatidylinositol 4-kinase, catalytic, alpha polypeptide"	224020	-
Htf9c	chr16	+	18162991	18163340	1.76	0.00198	18162991	18163340	2.04	0	HpaII tiny fragments locus 9c	15547	-
Ranbp1	chr16	-	18162991	18163340	1.76	0.00198	18162991	18163340	2.04	0	RAN binding protein 1	19385	Htf9a
Clcn2	chr16	-	20631218	20631567	2.32	0	20631218	20631567	1.63	0.00145	chloride channel 2	12724	AL118368|ClC-2|Clc2
Polr2h	chr16	+	20631218	20631567	2.32	0	20631218	20631567	1.63	0.00145	polymerase (RNA) II (DNA directed) polypeptide H	245841	MGC103049|MGC8248
Clcn2	chr16	-	20631921	20632270	1.95	0.000795	20631821	20632270	2.13	0	chloride channel 2	12724	AL118368|ClC-2|Clc2
Polr2h	chr16	+	20631921	20632270	1.95	0.000795	20631821	20632270	2.13	0	polymerase (RNA) II (DNA directed) polypeptide H	245841	MGC103049|MGC8248
Senp2	chr16	+	21924284	21925336	1.3	0.00598	21924184	21924633	1.36	0.00725	SUMO/sentrin specific peptidase 2	75826	2310007L05Rik|4930538C18Rik|AI646780|AW554757|KIAA1331|SUMO-1|Smt3ip2|mKIAA1331
Eif4a2	chr16	+	23022545	23023094	1.58	0.00277	23022645	23023094	1.36	0.00725	eukaryotic translation initiation factor 4A2	13682	4833432N07Rik|BM-010|Ddx2b|Eif4
Ccdc50	chr16	+	27302966	27303426	1.67	0.00293	27302966	27303426	1.63	0.00145	coiled-coil domain containing 50	67501	2610529H08Rik|AW048328|C3orf6
Lsg1	chr16	-	30507386	30508036	2.04	0	30507386	30507835	1.81	0.000468	large subunit GTPase 1 homolog (S. cerevisiae)	224092	5830465I20|AA409273|D16Bwg1547e
BC022623	chr16	+	30519233	30519582	1.9	0.00102	30519133	30519582	1.68	0.00144	cDNA sequence BC022623	224093	-
Centb2	chr16	-	31121060	31121417	1.39	0.00805	31121060	31121417	1.45	0.00418	"centaurin, beta 2"	78618	4832442G16|9530039J15Rik|ACAP2|CNT-B2|mKIAA0041
Centb2	chr16	-	31123171	31123420	1.76	0.0078	31123171	31123420	1.54	0.00915	"centaurin, beta 2"	78618	4832442G16|9530039J15Rik|ACAP2|CNT-B2|mKIAA0041
LOC666912	chr16	+	31997888	31998653	1.81	0.00184	31997888	31998353	1.27	0.00602	hypothetical protein LOC666912	666912	-
Pak2	chr16	-	31997888	31998653	1.81	0.00184	31997888	31998353	1.27	0.00602	p21 (CDKN1A)-activated kinase 2	224105	A130002K10Rik|AI836325|D16Ertd269e|KIAA4182|PAK-2|mKIAA4182
Pcyt1a	chr16	+	32350208	32350757	1.39	0.00805	32350208	32350757	1.36	0.00346	"phosphate cytidylyltransferase 1, choline, alpha isoform"	13026	CTalpha|Ctpct|Cttalpha
Umps	chr16	-	33886086	33887143	1.16	0.00159	33886886	33887340	1.5	0.00294	uridine monophosphate synthetase	22247	1700095D23Rik|AA408257|AL033308|BB164745
Cd86	chr16	-	36585048	36585398	1.71	0.00253	36585048	36585997	1.18	0.00987	CD86 antigen	12524	B7|B7-2|B7.2|B70|CLS1|Cd28l2|Ly-58|Ly58|MB7|MB7-2|TS/A-2
Golgb1	chr16	+	36849888	36850237	1.85	0.00102	36849988	36850344	1.99	0	"golgi autoantigen, golgin subfamily b, macrogolgin 1"	224139	4930428L02Rik|6330407A06Rik|AU042952|C130074L01Rik|F730017E11Rik|KIAA4151|mKIAA4151
Hcls1	chr16	+	36849888	36850237	1.85	0.00102	36849988	36850344	1.99	0	hematopoietic cell specific Lyn substrate 1	15163	AW213261|HS1
Hcls1	chr16	+	36854088	36854440	1.99	0.000699	36854088	36854440	2.04	0	hematopoietic cell specific Lyn substrate 1	15163	AW213261|HS1
BC031361	chr16	-	38008095	38008444	2.46	0	38008095	38008444	1.68	0.00144	cDNA sequence BC031361	414072	-
Gsk3b	chr16	+	38008095	38008444	2.46	0	38008095	38008444	1.68	0.00144	glycogen synthase kinase 3 beta	56637	7330414F15Rik|8430431H08Rik|C86142|GSK-3|GSK-3beta|GSK3
Adprh	chr16	-	38374537	38374886	2.04	0.00078	38374437	38374786	1.63	0.00145	ADP-ribosylarginine hydrolase	11544	Arh1
Cd80	chr16	+	38374537	38374886	2.04	0.00078	38374437	38374786	1.63	0.00145	CD80 antigen	12519	B7-1|B7.1|Cd28l|Ly-53|Ly53|MIC17|TS/A-1
Adprh	chr16	-	38376237	38376790	1.3	0.00813	38376237	38376686	1.41	0.00544	ADP-ribosylarginine hydrolase	11544	Arh1
Cd80	chr16	+	38376237	38376790	1.3	0.00813	38376237	38376686	1.41	0.00544	CD80 antigen	12519	B7-1|B7.1|Cd28l|Ly-53|Ly53|MIC17|TS/A-1
Atp6v1a	chr16	-	44058191	44058683	2.59	0	44058191	44058683	2.18	0	"ATPase, H+ transporting, lysosomal V1 subunit A"	11964	AI647066|Atp6a1|Atp6a2|Atp6v1a1|VA68|VPP2
Mak3	chr16	+	44058191	44058683	2.59	0	44058191	44058683	2.18	0	Mak3 homolog (S. cerevisiae)	72117	2600005K24Rik|2810441M03Rik|AW112078|Mak3p
Gm608	chr16	+	44091978	44092643	1.76	0	44091978	44092443	1.31	0.00946	"gene model 608, (NCBI)"	207806	Gm1779|mKIAA2018
LOC667535	chr16	-	44091978	44092643	1.76	0	44091978	44092443	1.31	0.00946	hypothetical protein LOC667535	667535	-
Cd47	chr16	+	49773829	49774180	1.67	0.00293	49773829	49775178	0.82	0.00877	"CD47 antigen (Rh-related antigen, integrin-associated signal transducer)"	16423	9130415E20Rik|AA407862|AI848868|AW108519|B430305P08Rik|IAP|Itgp
LOC668013	chr16	+	56642407	56642756	1.67	0.00293	56642407	56642756	1.41	0.00544	hypothetical protein LOC668013	668013	-
Tfg	chr16	-	56642407	56642756	1.67	0.00293	56642407	56642756	1.41	0.00544	Trk-fused gene	21787	AI173908
Cldnd1	chr16	+	58670104	58670653	1.67	0.00293	58670304	58670653	1.5	0.00294	claudin domain containing 1	224250	1110019C08Rik|AA407103|AI849195|AW489850
Stch	chr16	-	75649378	75650527	1.53	0	75649478	75649927	1.31	0.00946	"stress 70 protein chaperone, microsome-associated, human homolog"	110920	1600002I10Rik|AV006182|B230217N24Rik
Samsn1	chr16	-	75791785	75792147	2.04	0.00078	75791785	75792147	1.59	0.00245	"SAM domain, SH3 domain and nuclear localization signals, 1"	67742	4930571B16Rik|930571B16Rik|Hacs1
Zfp294	chr16	-	87321623	87321972	1.85	0.00102	87321523	87321972	1.36	0.00725	zinc finger protein 294	78913	4930528H02Rik|AV266914|C87237|KIAA0714
Itsn1	chr16	+	91669401	91669953	1.44	0.00405	91669501	91669953	1.45	0.00418	intersectin 1 (SH3 domain protein 1A)	16443	AA517634|AA545208|AI316805|EHSH1|Ese1|Intersectin|Itsn|Sh3p17
Mx1	chr16	-	97567706	97568164	1.95	0.000795	97567706	97568164	1.54	0.00239	myxovirus (influenza virus) resistance 1	17857	AI893580|Mx|Mx-1
Mx2	chr16	+	97690773	97691129	2.55	0	97690773	97691129	2.36	0	myxovirus (influenza virus) resistance 2	17858	AI528743|Mx-2
Rshl2	chr17	-	6797964	6798513	1.41	0.00679	6797964	6798513	1.42	0.00346	radial spokehead-like 2	66832	1700012G05Rik|4930524H12Rik|R74860
Tagap1	chr17	-	6810964	6811313	1.66	0.00368	6810964	6811313	1.99	0	T-cell activation GTPase activating protein 1	380608	2610315E15Rik|AA415005|FKSG15
Rshl2	chr17	+	7783676	7784125	1.71	0.00331	7783876	7784225	1.37	0.00946	radial spokehead-like 2	66832	1700012G05Rik|4930524H12Rik|R74860
1700010I14Rik	chr17	+	8826480	8826829	1.56	0.0052	8826480	8826829	1.47	0.00544	RIKEN cDNA 1700010I14 gene	66931	-
Gpr31c	chr17	-	12895362	12895711	2.49	0	12895462	12895819	1.61	0.00239	"G protein-coupled receptor 31, D17Leh66c region"	436440	GPR31c(t)
9030025P20Rik	chr17	+	14745725	14746874	1.37	0.00598	14746025	14746474	1.47	0.00247	RIKEN cDNA 9030025P20 gene	381062	2210404J11Rik|2410011O22Rik
Tcte3	chr17	-	14745725	14746874	1.37	0.00598	14746025	14746474	1.47	0.00247	t-complex-associated testis expressed 3	21647	D17Leh117c|LC2|Tcte-3|Tctex-2|Tctex-4|Tctex2|Tctex4
5830433I10Rik	chr17	-	15410538	15410987	1.76	0.00293	15410738	15411088	1.56	0.00294	RIKEN cDNA 5830433I10 gene	76030	-
Chd1	chr17	+	15410538	15410987	1.76	0.00293	15410738	15411088	1.56	0.00294	chromodomain helicase DNA binding protein 1	12648	4930525N21Rik|AI851787|AW555109
BC002059	chr17	+	16655643	16655992	2.93	0	16655543	16655892	2.7	0	cDNA sequence BC002059	213811	MGC6110
BC018101	chr17	+	16768080	16768529	1.85	0.00198	16768080	16768529	2.18	0	cDNA sequence BC018101	449000	-
Zfp97	chr17	+	16768080	16768529	1.85	0.00198	16768080	16768529	2.18	0	zinc finger protein 97	22759	NGD16-4
BC018101	chr17	+	16825482	16825931	2.05	0.000795	16825482	16825931	1.94	0	cDNA sequence BC018101	449000	-
Zfp97	chr17	+	16825482	16825931	2.05	0.000795	16825482	16825931	1.94	0	zinc finger protein 97	22759	NGD16-4
LOC626854	chr17	+	16998514	16998863	2.78	0	16998414	16998763	2.74	0	similar to zinc finger protein 709	626854	-
Ppp2r1a	chr17	+	20649514	20650063	1.32	0.0091	20649714	20650063	2.03	0	"protein phosphatase 2 (formerly 2A), regulatory subunit A (PR 65), alpha isoform"	51792	6330556D22Rik|PP2A|PR65
Zfp52	chr17	+	21239696	21240745	2.19	0.000678	21240096	21240745	1.56	0.00294	zinc finger protein 52	22710	KRAB11|Zfp-52|Zfp76|mszf23-2|mszf24|mszf34|zfec29
4930432O21Rik	chr17	+	21666607	21667356	1.37	0.00598	21666607	21667456	1.7	0	RIKEN cDNA 4930432O21 gene	74670	-
MGC107415	chr17	-	21666607	21667356	1.37	0.00598	21666607	21667456	1.7	0	hypothetical protein LOC383216	383216	-
6330416L07Rik	chr17	-	22065246	22066295	2.78	0	22065946	22066295	2.27	0	RIKEN cDNA 6330416L07 gene	319615	MGC117948
6330416L07Rik	chr17	-	22065246	22066295	2.78	0	22065146	22065601	1.47	0.00544	RIKEN cDNA 6330416L07 gene	319615	MGC117948
BC021442	chr17	+	22065246	22066295	2.78	0	22065146	22065601	1.47	0.00544	cDNA sequence BC021442	224598	MGC29357|MGC67807
BC021442	chr17	+	22065246	22066295	2.78	0	22065946	22066295	2.27	0	cDNA sequence BC021442	224598	MGC29357|MGC67807
9530082P21Rik	chr17	+	23474501	23474850	1.51	0.00597	23474501	23474950	1.51	0.00418	RIKEN cDNA 9530082P21 gene	638247	E030034P13Rik
Kremen2	chr17	-	23474501	23474850	1.51	0.00597	23474501	23474950	1.51	0.00418	kringle containing transmembrane protein 2	73016	2900054E04Rik
9530082P21Rik	chr17	+	23475829	23476078	2.93	0	23475829	23476078	2.18	0	RIKEN cDNA 9530082P21 gene	638247	E030034P13Rik
Kremen2	chr17	-	23475829	23476078	2.93	0	23475829	23476078	2.18	0	kringle containing transmembrane protein 2	73016	2900054E04Rik
E4f1	chr17	-	24182929	24183178	2.24	0	24182929	24183178	1.89	0.00142	E4F transcription factor 1	13560	-
9930021D14Rik	chr17	+	24199440	24199792	2.24	0.000759	24199440	24199792	1.66	0.00245	RIKEN cDNA 9930021D14 gene	319259	-
E4f1	chr17	-	24199440	24199792	2.24	0.000759	24199440	24199792	1.66	0.00245	E4F transcription factor 1	13560	-
Traf7	chr17	-	24255580	24255929	2.73	0	24255580	24255929	1.8	0.000822	Tnf receptor-associated factor 7	224619	MGC7807|RFWD1
Nubp2	chr17	-	24613860	24614210	2.15	0.00078	24613860	24614210	1.89	0.000468	nucleotide binding protein 2	26426	D17Wsu11e
Spsb3	chr17	+	24613860	24614210	2.15	0.00078	24613860	24614210	1.89	0.000468	splA/ryanodine receptor domain and SOCS box containing 3	79043	2310012N15Rik|3300001M01Rik|KIAA4204|SSB3|Tce1|mKIAA4204
Tmem8	chr17	+	25840393	25840642	2.39	0	25840393	25840642	2.65	0	transmembrane protein 8 (five membrane-spanning domains)	60455	AW490096|M83
Itpr3	chr17	+	26783676	26784225	1.32	0.0091	26783876	26784225	1.37	0.00946	"inositol 1,4,5-triphosphate receptor 3"	16440	Ip3r3|Itpr-3
Itpr3	chr17	+	26785302	26785651	1.46	0.00805	26785302	26785651	1.8	0.000822	"inositol 1,4,5-triphosphate receptor 3"	16440	Ip3r3|Itpr-3
Fgd2	chr17	+	29087680	29088029	2.34	0.000325	29087780	29088129	2.79	0	"FYVE, RhoGEF and PH domain containing 2"	26382	ZFYVE4
Fgd2	chr17	+	29089177	29089626	2.19	0.000678	29089177	29089626	1.8	0	"FYVE, RhoGEF and PH domain containing 2"	26382	ZFYVE4
Fgd2	chr17	+	29090077	29090826	1.71	0.00331	29090077	29090826	1.37	0.00946	"FYVE, RhoGEF and PH domain containing 2"	26382	ZFYVE4
A430107D22Rik	chr17	-	32134462	32134911	1.51	0.00597	32134562	32134911	1.56	0.00294	RIKEN cDNA A430107D22 gene	320484	-
A530088E08Rik	chr17	+	32134462	32134911	1.51	0.00597	32134562	32134911	1.56	0.00294	RIKEN cDNA A530088E08 gene	664702	-
9030612M13Rik	chr17	-	32526698	32527054	1.85	0.00198	32526698	32527054	1.7	0.00145	RIKEN cDNA 9030612M13 gene	208292	4732483N19|AI118577|mKIAA3006
Rab11b	chr17	-	33367154	33367809	1.85	0	33367454	33367809	2.03	0	"RAB11B, member RAS oncogene family"	19326	-
AA388235	chr17	+	33589181	33589530	2.78	0	33589181	33589530	2.56	0	expressed sequence AA388235	433100	-
LOC630499	chr17	-	33589181	33589530	2.78	0	33589181	33589530	2.56	0	"similar to H-2 class I histocompatibility antigen, D-K alpha chain precursor (H-2D(K))"	630499	-
H2-K1	chr17	-	33610796	33611145	2.54	0	33610796	33611145	2.37	0	"histocompatibility 2, K1, K region"	14972	H-2K|H-2K(d)|H2-K|MGC7052|MHC I
LOC56628	chr17	-	33610796	33611145	2.54	0	33610796	33611145	2.37	0	MHC (A.CA/J(H-2K-f) class I antigen	56628	-
H2-Oa	chr17	+	33703035	33703384	2.34	0.000325	33703035	33703384	1.56	0.00294	"histocompatibility 2, O region alpha locus"	15001	H-2Oa
H2-DMb1	chr17	+	33753541	33753890	2.19	0.000678	33753041	33753890	2.27	0	"histocompatibility 2, class II, locus Mb1"	14999	AI385589|H-2Mb1|H2-Mb1
H2-DMb2	chr17	+	33753541	33753890	2.19	0.000678	33753041	33753890	2.27	0	"histocompatibility 2, class II, locus Mb2"	15000	H-2Mb2|H2-Mb2
Psmb8	chr17	+	33807532	33808781	1.71	0.00331	33807432	33808781	1.47	0	"proteosome (prosome, macropain) subunit, beta type 8 (large multifunctional peptidase 7)"	16913	Lmp-7|Lmp7
Cfb	chr17	-	34472854	34473203	2.83	0	34472854	34473303	2.27	0	complement factor B	14962	AI195813|AI255840|B|Bf|FB|H2-Bf
Hspa1l	chr17	-	34589697	34590048	2.24	0.000759	34589697	34590048	2.27	0	heat shock protein 1-like	15482	70kDa|Hsc70t|Msh5
Lsm2	chr17	+	34589697	34590048	2.24	0.000759	34589697	34590048	2.27	0	"LSM2 homolog, U6 small nuclear RNA associated (S. cerevisiae)"	27756	D17H6S56E-2|D17H6S56E2|Dmapl|Dmpkap|G7b|MGC13889|Sm-X5|SmX5|snRNP
Aif1	chr17	-	34780516	34780765	2.05	0.00128	34780516	34780765	1.8	0.00224	allograft inflammatory factor 1	11629	AI607846|AIF-1|D17H6S50E|G1|Iba1
Aif1	chr17	-	34781316	34781665	2.19	0.000678	34781416	34781765	1.51	0.00418	allograft inflammatory factor 1	11629	AI607846|AIF-1|D17H6S50E|G1|Iba1
Lst1	chr17	-	34798236	34798685	1.66	0.00368	34798236	34798685	1.7	0.00145	leukocyte specific transcript 1	16988	B144
Ltb	chr17	+	34798236	34798685	1.66	0.00368	34798236	34798685	1.7	0.00145	lymphotoxin B	16994	AI662801|LTbeta|Tnfc|Tnfsf3|p33
H2-D1	chr17	+	34870899	34871248	3.07	0	34870899	34871248	2.93	0	"histocompatibility 2, D region locus 1"	14964	H-2D|H2-D|MHC B7.2
H2-Q5	chr17	+	34870899	34871248	3.07	0	34870899	34871248	2.93	0	"histocompatibility 2, Q region locus 5"	15016	H-2Q5|Qa-5|Qa5|Qat-5
LOC547343	chr17	+	34870899	34871248	3.07	0	34870899	34871248	2.93	0	"similar to H-2 class I histocompatibility antigen, L-D alpha chain precursor"	547343	-
H2-Q1	chr17	+	34987419	34987768	2.73	0	34987419	34987768	2.74	0	"histocompatibility 2, Q region locus 1"	15006	H-2Q1|MGC91064|Q1b|Q1d|Q1k|Qa-1|Qa1|Qed-1
H2-Q8	chr17	+	35001743	35002192	2.78	0	35001743	35002192	2.65	0	"histocompatibility 2, Q region locus 8"	15019	H-2Q8|MMS10-T|Ms10t|Qa-2|Qa-8|Qa8
H2-Q6	chr17	+	35032496	35032945	2.97	0	35032496	35033045	2.56	0	"histocompatibility 2, Q region locus 6"	110557	H-2Q6|Qa-6|Qa6
H2-Q7	chr17	+	35046841	35047290	2.68	0	35046841	35047290	2.93	0	"histocompatibility 2, Q region locus 7"	15018	H-2Q7|Ped|Q9|Qa-2|Qa-7|Qa7
Flot1	chr17	+	35429415	35429764	1.9	0.00184	35429215	35429764	1.28	0.00877	flotillin 1	14251	-
Ier3	chr17	+	35429415	35429764	1.9	0.00184	35429215	35429764	1.28	0.00877	immediate early response 3	15937	AI663993|IEX-1|cI-3|gly96
Mdc1	chr17	+	35445510	35446459	1.76	0.00293	35445510	35445861	1.42	0.00725	mediator of DNA damage checkpoint 1	240087	6820401C03|AA413496|NFBD1|mKIAA0170
Tubb5	chr17	-	35445510	35446459	1.76	0.00293	35445510	35445861	1.42	0.00725	"tubulin, beta 5"	22154	AA408537|AI596182|B130022C14Rik|M(beta)5
Mdc1	chr17	+	35449210	35449959	1.71	0	35449210	35449659	1.47	0.00247	mediator of DNA damage checkpoint 1	240087	6820401C03|AA413496|NFBD1|mKIAA0170
Tubb5	chr17	-	35449210	35449959	1.71	0	35449210	35449659	1.47	0.00247	"tubulin, beta 5"	22154	AA408537|AI596182|B130022C14Rik|M(beta)5
2310014H01Rik	chr17	+	35469721	35469986	2.78	0	35469721	35469986	2.98	0	RIKEN cDNA 2310014H01 gene	76448	AA407849|AI450394
Nrm	chr17	+	35469721	35469986	2.78	0	35469721	35469986	2.98	0	nurim (nuclear envelope membrane protein)	106582	AI429796
2310014H01Rik	chr17	+	35473795	35474144	2.49	0	35473195	35474044	1.89	0	RIKEN cDNA 2310014H01 gene	76448	AA407849|AI450394
2310014H01Rik	chr17	+	35475097	35475346	1.95	0.00468	35475097	35475346	2.13	0	RIKEN cDNA 2310014H01 gene	76448	AA407849|AI450394
Mrps18b	chr17	-	35524514	35524963	2.58	0	35524514	35524863	2.32	0	mitochondrial ribosomal protein S18B	66973	2400002C15Rik
Ppp1r10	chr17	+	35524514	35524963	2.58	0	35524514	35524863	2.32	0	"protein phosphatase 1, regulatory subunit 10"	52040	2610025H06Rik|CAT53|D17Ertd808e|FB19|PNUTS
Trim39	chr17	-	35881855	35882204	1.8	0.00253	35881255	35882204	2.37	0	tripartite motif protein 39	79263	1100001D15Rik|E130103K13Rik|KIAA4179|RBCC-B30.2|Rnf23|mKIAA4179|tfp
Ppp1r11	chr17	-	36559054	36559803	3.56	0	36559054	36559803	3.55	0	"protein phosphatase 1, regulatory (inhibitor) subunit 11"	76497	1500041B02Rik|AV117883|HCG-V|HCGV|Tcte5|Tctex-5|Tctex5
Mog	chr17	-	36630802	36631151	1.8	0.00253	36630802	36631151	1.47	0.00544	myelin oligodendrocyte glycoprotein	17441	-
H2-M3	chr17	+	36878045	36878494	2.19	0	36878045	36878494	2.41	0	"histocompatibility 2, M region locus 3"	14991	H-2M3|Hmt|M3a
Gm323	chr17	-	45018087	45018443	1.46	0.00805	45018087	45018443	1.37	0.00946	"gene model 323, (NCBI)"	210573	-
Nfkbie	chr17	+	45018087	45018443	1.46	0.00805	45018087	45018443	1.37	0.00946	"nuclear factor of kappa light polypeptide gene enhancer in B-cells inhibitor, epsilon"	18037	IKBE
Srf	chr17	-	46019404	46019756	1.76	0.00293	46019504	46019853	1.42	0.00725	serum response factor	20807	AW049942|AW240594
AI314976	chr17	+	47874306	47874655	2.24	0.000759	47874306	47874655	1.7	0.00145	expressed sequence AI314976	106821	AW558560
Nfya	chr17	-	47874306	47874655	2.24	0.000759	47874306	47874655	1.7	0.00145	nuclear transcription factor-Y alpha	18044	AA407810|Cbf-b|SEZ-10|SEZ10
AI314976	chr17	+	47875406	47877055	1.85	0	47875406	47876157	1.61	0	expressed sequence AI314976	106821	AW558560
Nfya	chr17	-	47875406	47877055	1.85	0	47875406	47876157	1.61	0	nuclear transcription factor-Y alpha	18044	AA407810|Cbf-b|SEZ-10|SEZ10
Mocs1	chr17	+	48893680	48894029	2.15	0.00078	48893680	48894029	1.61	0.00239	molybdenum cofactor synthesis 1	56738	3110045D15Rik|AI043170|AW536397
Rab5a	chr17	+	52943712	52944061	1.61	0.0042	52943812	52944261	1.94	0	"RAB5A, member RAS oncogene family"	271457	2410015H04Rik|AI663973|AU021172
BC011426	chr17	+	55485173	55485622	2	0.00102	55485273	55485722	1.66	0.00245	cDNA sequence BC011426	224893	MGC18740
BC031441	chr17	-	55538302	55538751	2.1	0.000699	55538302	55538751	1.56	0.00294	cDNA sequence BC031441	240120	MGC18735
Ccdc94	chr17	+	55552247	55552896	1.95	0	55552247	55552599	1.8	0.000822	coiled-coil domain containing 94	72886	2900016D05Rik|AI413813
Chaf1a	chr17	+	55629719	55630468	1.32	0.00644	55629919	55630268	1.37	0.00946	"chromatin assembly factor 1, subunit A (p150)"	27221	AL023013|AL024058|CAF-1|Cac1p
Sh3gl1	chr17	-	55629719	55630468	1.32	0.00644	55629919	55630268	1.37	0.00946	SH3-domain GRB2-like 1	20405	C77078|EEN|SH3P8|Sh3d2b
Fem1a	chr17	+	55889580	55890029	1.61	0.0042	55890080	55890429	1.61	0.00239	feminization 1 homolog a (C. elegans)	14154	AW611390|MGC117925
Fem1a	chr17	+	55890080	55890529	1.85	0.00198	55890080	55890429	1.61	0.00239	feminization 1 homolog a (C. elegans)	14154	AW611390|MGC117925
M6prbp1	chr17	-	55924866	55925215	2.1	0.000699	55924866	55925215	1.7	0.00145	mannose-6-phosphate receptor binding protein 1	66905	1300012C15Rik
Safb	chr17	+	56269167	56269630	1.71	0.00331	56269167	56269630	1.75	0.00144	scaffold attachment factor B	224903	3110021E02Rik|5330423C17Rik|AU018122|D18386|E130307D12|HAP|HET|SAFB1
Safb2	chr17	-	56269167	56269630	1.71	0.00331	56269167	56269630	1.75	0.00144	scaffold attachment factor B2	224902	AA389433|AI255170|mKIAA0138
Dus3l	chr17	+	56449977	56450526	1.32	0.0091	56449677	56450526	0.99	0	dihydrouridine synthase 3-like (S. cerevisiae)	224907	AI662135|AW557805|MGC56820
Clpp	chr17	+	56675178	56675527	1.95	0.00102	56674878	56675327	2.03	0	"caseinolytic peptidase, ATP-dependent, proteolytic subunit homolog (E. coli)"	53895	AU019820|D17Wsu160e
C3	chr17	-	56915162	56915511	2.44	0	56915162	56915511	2.41	0	complement component 3	12266	AI255234|ASP|Plp
Gpr108	chr17	-	56933155	56933504	2.93	0	56933155	56933604	2.41	0	G protein-coupled receptor 108	78308	1810015L19Rik|AA589464|C79132
Trip10	chr17	+	56933155	56933504	2.93	0	56933155	56933604	2.41	0	thyroid hormone receptor interactor 10	106628	AI646975|Cip4
Mylc2b	chr17	-	70894694	70895343	1.56	0.0052	70894594	70895643	1.47	0.00247	"myosin light chain, regulatory B"	67938	1500001M02Rik|C77744|RLC-B
Wdr43	chr17	+	71520821	71521170	2.54	0	71520821	71521170	2.22	0	WD repeat domain 43	72515	2610318G08Rik|AU020887|AV024208|Wrd43|mKIAA0007
Xdh	chr17	-	73854587	73854936	1.85	0.00198	73854587	73854936	2.13	0	xanthine dehydrogenase	22436	XO|Xor|Xox-1|Xox1
2410091C18Rik	chr17	+	78840959	78841311	1.66	0.00368	78840959	78842308	1.61	0	RIKEN cDNA 2410091C18 gene	73694	AL033374|MGC117993|PRO1853
Cebpz	chr17	-	78840959	78841311	1.66	0.00368	78840959	78842308	1.61	0	CCAAT/enhancer binding protein zeta	12607	AI848081|CBF2|Cbf|Cebpa-rs1|MGC36087
Dhx57	chr17	-	80161125	80161474	1.66	0.00368	80161125	80161683	1.42	0.00725	DEAH (Asp-Glu-Ala-Asp/His) box polypeptide 57	106794	AW494914|MGC77974
Haao	chr17	-	83754565	83754914	2.19	0.000678	83754565	83754914	2.03	0	"3-hydroxyanthranilate 3,4-dioxygenase"	107766	0610007K21Rik|0610012J07Rik
Ppm1b	chr17	+	84879227	84879481	1.85	0.0078	84879227	84879481	1.85	0.00128	"protein phosphatase 1B, magnesium dependent, beta isoform"	19043	MGC106489|PP2CB
Prepl	chr17	-	85000166	85000523	3.12	0	85000166	85000523	3.12	0	prolyl endopeptidase-like	213760	2810457N15Rik|9530014L06Rik|D030028O16Rik|MGC7980|mKIAA0436
1200020A08Rik	chr17	+	86933869	86934218	2.05	0.000795	86933869	86934218	1.99	0	RIKEN cDNA 1200020A08 gene	56724	AA589469|CRIPT
Pigf	chr17	-	86933869	86934218	2.05	0.000795	86933869	86934218	1.99	0	"phosphatidylinositol glycan, class F"	18701	-
LOC668864	chr17	-	88350364	88351118	2.29	0.000277	88350264	88350623	2.13	0	hypothetical protein LOC668864	668864	-
Mettl4	chr17	-	95053851	95054200	1.71	0.00331	95053651	95054000	1.37	0.00946	methyltransferase like 4	76781	2410198H06Rik|A730091E08Rik|AV296509|HsT661
2610044O15Rik	chr17	-	95139056	95139406	2.15	0.00078	95139056	95139913	1.75	0	RIKEN cDNA 2610044O15 gene	72139	-
Crem	chr18	-	3280960	3281309	2.95	0	3280960	3281217	2.66	0	cAMP responsive element modulator	12916	ICER
Map3k8	chr18	-	4353201	4353550	1.54	0.0042	4353201	4353650	1.51	0.00107	mitogen activated protein kinase kinase kinase 8	26410	Cot|Cot/Tpl2|Est|Estf|Tpl-2|Tpl2|c-COT
Esco1	chr18	-	10609103	10609552	2.06	0.00078	10609203	10609552	1.65	0.00145	establishment of cohesion 1 homolog 1 (S. cerevisiae)	77805	A930014I12Rik
LOC665263	chr18	+	10609103	10609552	2.06	0.00078	10609203	10609552	1.65	0.00145	hypothetical protein LOC665263	665263	-
Mib1	chr18	+	10725172	10725621	1.4	0.00805	10725172	10725521	1.56	0.00239	mindbomb homolog 1 (Drosophila)	225164	DIP-1|E430019M12Rik|MGC18948|Mib|mKIAA1323
Riok3	chr18	+	12271844	12272294	2.06	0.00078	12271744	12272493	1.42	0.00544	RIO kinase 3 (yeast)	66878	1200013N13Rik|D18Ertd331e|E130306C24Rik|Sudd
Cabyr	chr18	+	12881573	12881926	2.43	0	12881573	12882422	1.56	0.00239	calcium-binding tyrosine-(Y)-phosphorylation regulated (fibrousheathin 2)	71132	1700016C01Rik|4933421A18Rik|CBP86|FSP-2|MGC130217|MGC130218
Zfp191	chr18	-	24163188	24163537	1.73	0.00253	24163188	24163537	1.61	0.00245	zinc finger protein 191	59057	3526401F17Rik|5033419P20Rik|AI480505|AI642085|AL024422|KOX17|ZF-12|Znf191|Znp191
Rit2	chr18	-	31462888	31463250	2.57	0	31462988	31463351	1.88	0	Ras-like without CAAX 2	19762	RIBA|Rin|Roc2
Reep5	chr18	-	34498380	34498829	1.36	0.00679	34498580	34498929	1.97	0	receptor accessory protein 5	13476	AI324241|AU022809|AW495741|DP1/TB2|Dp1|R74856|TB2/DP1
Etf1	chr18	-	35057854	35058303	1.5	0.0052	35057854	35058303	1.42	0.00544	eukaryotic translation termination factor 1	225363	AI463371|ERF|ERF1|MGC18745|SUP45L1|TB3-1
2610307O08Rik	chr18	-	35866029	35866378	2.25	0.000325	35865929	35866279	1.93	0	RIKEN cDNA 2610307O08 gene	72512	-
Sra1	chr18	-	36796023	36796372	2.25	0.000325	36796023	36796372	1.84	0.000468	steroid receptor RNA activator 1	24068	AA959952|SRA|STRAA1|Strra1
Diap1	chr18	-	38060635	38060984	1.78	0.00198	38060635	38060984	1.47	0.00418	diaphanous homolog 1 (Drosophila)	13367	D18Wsu154e|Dia1|Drf1|KIAA4062|mKIAA4062|p140mDia
4631403P03Rik	chr18	+	38081021	38081470	1.45	0.00597	38081021	38081470	1.29	0.00602	RIKEN cDNA 4631403P03 gene	225392	MGC47374
Hdac3	chr18	-	38081021	38081470	1.45	0.00597	38081021	38081470	1.29	0.00602	histone deacetylase 3	15183	AW537363
Ndfip1	chr18	+	38541698	38542251	1.73	0.00253	38541698	38542251	1.65	0	Nedd4 family interacting protein 1	65113	0610010M22Rik|N4wbp5
Tcerg1	chr18	+	42637021	42637370	1.4	0.00805	42637021	42637370	1.42	0.00544	transcription elongation regulator 1 (CA150)	56070	2410022J09Rik|2900090C16Rik|AI428505|CA150b|FBP 23|Taf2s|ca150|p144
Ticam2	chr18	-	46699313	46699662	1.83	0.00184	46699113	46699462	1.33	0.00946	toll-like receptor adaptor molecule 2	225471	B430113A10|MGC107370|TICAM-2|TRAM|Tirp|Trif
Dmxl1	chr18	+	49957476	49957825	1.68	0.00293	49957376	49957825	1.38	0.00725	Dmx-like 1	240283	C630007L23Rik|D030030C22
Zfp608	chr18	-	55023706	55024555	2.2	0	55023706	55024155	1.61	0.00245	zinc finger protein 608	269023	4932417D18Rik|MGC116601
Zfp608	chr18	-	55025406	55025860	2.53	0	55025406	55025860	2.48	0	zinc finger protein 608	269023	4932417D18Rik|MGC116601
Gramd3	chr18	+	56591685	56592634	2.43	0	56591585	56591934	2.62	0	GRAM domain containing 3	107022	9030613F08Rik|9130427A09Rik|AW061306|NS3TP2
Gramd3	chr18	+	56594390	56594939	2.25	0.000325	56594690	56595039	2.66	0	GRAM domain containing 3	107022	9030613F08Rik|9130427A09Rik|AW061306|NS3TP2
1190002C06Rik	chr18	+	57477535	57478094	1.64	0.00331	57477235	57478094	1.61	0.00245	RIKEN cDNA 1190002C06 gene	73137	2310058D16Rik|3110038B19Rik|9430085A19Rik
2010002N04Rik	chr18	-	60627010	60627362	2.62	0	60627010	60627362	1.79	0.000435	RIKEN cDNA 2010002N04 gene	106878	AI195350|AW561905|cI-41
Dctn4	chr18	+	60650806	60651855	1.54	0.00393	60651406	60651955	1.24	0.00877	dynactin 4	67665	1110001K06Rik|4930547K17Rik|p62
Rps14	chr18	+	60899681	60900030	1.5	0.0052	60899681	60900030	1.42	0.00544	ribosomal protein S14	20044	2600014J02Rik|AL023078|MGC86125
LOC225609	chr18	+	62303615	62304064	1.83	0.00184	62303515	62304064	1.42	0.00544	hypothetical LOC225609	225609	-
A230091H23Rik	chr18	+	62673537	62674386	1.83	0	62674037	62674386	1.7	0.00144	RIKEN cDNA A230091H23 gene	328971	-
Fbxo38	chr18	-	62673537	62674386	1.83	0	62674037	62674386	1.7	0.00144	F-box protein 38	107035	6030410I24Rik|AU044865|AW214031|Moka|SP329
F730048M01Rik	chr18	+	65430151	65430500	2.15	0.000759	65430151	65430500	2.07	0	RIKEN cDNA F730048M01 gene	641453	-
Malt1	chr18	+	65555742	65556291	1.78	0	65555442	65556291	1.38	0	mucosa associated lymphoid tissue lymphoma translocation gene 1	240354	A630046N12|D430033E09Rik|MGC124469|MGC124470
Ptpn2	chr18	-	67850196	67850552	1.78	0.00198	67849596	67850355	1.19	0.00987	"protein tyrosine phosphatase, non-receptor type 2"	19255	AI325124|Ptpt|TC-PTP
Rkhd2	chr18	+	73697306	73697855	1.97	0.000795	73697306	73697855	1.33	0.00423	ring finger and KH domain containing 2	240396	BC035207|BM-013
Cpt1a	chr19	+	3321798	3322147	1.94	0.00102	3321598	3322047	1.49	0.00418	"carnitine palmitoyltransferase 1a, liver"	12894	C730027G07|CPTI|Cpt1
Tcirg1	chr19	-	3905580	3905929	2.43	0	3905580	3905929	2.09	0	"T-cell, immune regulator 1, ATPase, H+ transporting, lysosomal V0 protein A3"	27060	ATP6N1C|ATP6a3|Atp6i|OC-116|OPTB1|Stv1|TIRC7|Vph1|oc
Ndufv1	chr19	-	4012608	4013257	1.75	0	4012608	4013057	1.44	0.00544	NADH dehydrogenase (ubiquinone) flavoprotein 1	17995	-
Ppp1ca	chr19	+	4190917	4191269	1.7	0.00331	4190817	4191269	1.91	0	"protein phosphatase 1, catalytic subunit, alpha isoform"	19045	Ppp1c|dism2
Tbc1d10c	chr19	-	4190917	4191269	1.7	0.00331	4190817	4191269	1.91	0	"TBC1 domain family, member 10c"	108995	1810062O14Rik|AI428527
Pold4	chr19	+	4230686	4231435	1.46	0.00521	4230686	4231144	1.81	0.000435	"polymerase (DNA-directed), delta 4"	69745	2410012M21Rik|AI463381|AW060307|POLDS|p12
Pold4	chr19	+	4231586	4232135	2.91	0	4231486	4232135	2.93	0	"polymerase (DNA-directed), delta 4"	69745	2410012M21Rik|AI463381|AW060307|POLDS|p12
9430078G10Rik	chr19	+	4394870	4395319	1.6	0.0042	4394770	4395121	1.44	0.00544	RIKEN cDNA 9430078G10 gene	619307	-
LOC665978	chr19	+	4394870	4395319	1.6	0.0042	4394770	4395121	1.44	0.00544	hypothetical protein LOC665978	665978	-
Pcx	chr19	+	4509486	4510435	1.65	0.00368	4510086	4510535	1.58	0.00239	pyruvate carboxylase	18563	Pc
Dpp3	chr19	-	4928213	4928562	1.5	0.00597	4928113	4928462	1.67	0.00145	dipeptidylpeptidase 3	75221	4930533O14Rik|C86324
Cfl1	chr19	+	5490274	5490723	2.09	0.000699	5490274	5490823	1.39	0.00346	"cofilin 1, non-muscle"	12631	AA959946|Cof|cofilin
Mus81	chr19	-	5490274	5490723	2.09	0.000699	5490274	5490823	1.39	0.00346	MUS81 endonuclease homolog (yeast)	71711	1200008A18Rik|AI182501|AW045863
B930037P14Rik	chr19	-	5511339	5511688	2.38	0	5511439	5511788	1.86	0.000468	RIKEN cDNA B930037P14 gene	225861	-
B930037P14Rik	chr19	-	5512039	5512988	2.28	0	5512039	5512988	1.91	0	RIKEN cDNA B930037P14 gene	225861	-
Mtvr2	chr19	-	5731616	5731965	1.65	0.00368	5731616	5731965	1.49	0.00418	mammary tumor virus receptor 2	17826	1110021A21Rik|MMTV
Sssca1	chr19	-	5731616	5731965	1.65	0.00368	5731616	5731965	1.49	0.00418	Sjogren's syndrome/scleroderma autoantigen 1 homolog (human)	56390	1500016H19Rik|C184L
Ehd1	chr19	+	6275945	6276294	2.38	0	6275945	6276294	2.51	0	EH-domain containing 1	13660	AA409636|Past1|RME-1
Men1	chr19	+	6334753	6335002	1.8	0.00729	6334753	6335002	1.58	0.00915	multiple endocrine neoplasia 1	17283	AW045611
Sf1	chr19	+	6363192	6363741	2.52	0	6363192	6363541	2.14	0	splicing factor 1	22668	BB094781|CW17R|MZFM|WBP4|Zfp162
0610038D11Rik	chr19	+	6977012	6977361	2.23	0.000759	6977112	6977461	1.39	0.00725	RIKEN cDNA 0610038D11 gene	67674	-
Prdx5	chr19	-	6977012	6977361	2.23	0.000759	6977112	6977461	1.39	0.00725	peroxiredoxin 5	54683	AOEB166|AOPP|Pmp20|Prdx6|PrxV
Otub1	chr19	-	7273478	7273935	1.75	0	7273578	7273935	1.63	0.00245	"OTU domain, ubiquitin aldehyde binding 1"	107260	AI850305
Polr2g	chr19	-	8865502	8865751	2.09	0	8865502	8865751	1.86	0.00142	polymerase (RNA) II (DNA directed) polypeptide G	67710	2410046K11Rik|A230108L04Rik|C76415
Zbtb3	chr19	+	8865502	8865751	2.09	0	8865502	8865751	1.86	0.00142	zinc finger and BTB domain containing 3	75291	4930563M09Rik
Hnrpul2	chr19	+	8885909	8886458	1.65	0.00368	8886209	8886558	1.77	0.000822	heterogeneous nuclear ribonucleoprotein U-like 2	68693	1110031M08Rik|AI465155
Ttc9c	chr19	-	8885909	8886458	1.65	0.00368	8886209	8886558	1.77	0.000822	tetratricopeptide repeat domain 9C	70387	2210019E14Rik|6330408J23Rik
Hnrpul2	chr19	+	8886709	8887058	2.33	0.000325	8886209	8886558	1.77	0.000822	heterogeneous nuclear ribonucleoprotein U-like 2	68693	1110031M08Rik|AI465155
D19Ertd721e	chr19	+	8938357	8938606	1.89	0.00752	8938357	8938706	1.35	0.00946	"DNA segment, Chr 19, ERATO Doi 721, expressed"	225896	2B28|4930455J02Rik|MGC6696|T25529
1810009A15Rik	chr19	+	8955797	8956456	2.14	0.00078	8955797	8956456	1.86	0	RIKEN cDNA 1810009A15 gene	66276	-
Ints5	chr19	+	8955797	8956456	2.14	0.00078	8955797	8956456	1.86	0	integrator complex subunit 5	109077	1110055N21Rik|mKIAA1698
Rbm21	chr19	+	9020097	9021148	1.55	0.00317	9020197	9021148	1.12	0.00219	RNA binding motif protein 21	70044	2700038E08Rik|PAPD2
Eef1g	chr19	+	9033892	9034241	1.65	0.00368	9033792	9034141	1.58	0.00239	eukaryotic translation elongation factor 1 gamma	67160	2610301D06Rik|AA407312|EF1G|MGC103354
Incenp	chr19	-	9965555	9966410	1.8	0.00253	9965455	9965810	1.67	0.00145	inner centromere protein	16319	2700067E22Rik|AU019509|C130081E20|C77457
Incenp	chr19	-	9966561	9966918	2.33	0.000325	9966561	9966918	2.05	0	inner centromere protein	16319	2700067E22Rik|AU019509|C130081E20|C77457
A430093F15Rik	chr19	+	10805941	10806290	2.43	0	10805941	10806290	2.32	0	RIKEN cDNA A430093F15 gene	403202	Gm674
Cd5	chr19	-	10805941	10806290	2.43	0	10805941	10806290	2.32	0	CD5 antigen	12507	Ly-1|Ly-12|Ly-A|Lyt-1
Slc15a3	chr19	+	10908838	10909387	2.38	0	10908838	10909787	2.65	0	"solute carrier family 15, member 3"	65221	Ci1|cI-1
Slc15a3	chr19	+	10909438	10909787	2.86	0	10908838	10909787	2.65	0	"solute carrier family 15, member 3"	65221	Ci1|cI-1
Ccdc86	chr19	-	11016657	11017006	1.7	0.00331	11016457	11017006	2.05	0	coiled-coil domain containing 86	108673	4933411H20Rik|6720480F16Rik|D19Ertd678e
Ms4a1	chr19	-	11333127	11333776	2.48	0	11333127	11333776	1.58	0	"membrane-spanning 4-domains, subfamily A, member 1"	12482	AA960661|Cd20|Ly-44|Ms4a2
Oosp1	chr19	-	11757925	11758274	1.55	0.0052	11757925	11758874	1.16	0	oocyte secreted protein 1	170834	AA536827
Oosp1	chr19	-	11758525	11758874	1.89	0.00184	11757925	11758874	1.16	0	oocyte secreted protein 1	170834	AA536827
Lpxn	chr19	+	12865486	12865935	2.28	0.000277	12865486	12865843	2	0	leupaxin	107321	4933402K05Rik|A530083L21Rik|AV278559|LDPL
Zfp91	chr19	-	12865486	12865935	2.28	0.000277	12865486	12865843	2	0	zinc finger protein 91	109910	9130014I08Rik|A530054C17Rik|AL024263|AW545902|Pzf
Psat1	chr19	-	15991770	15992119	1.84	0.00198	15991770	15992219	1.58	0.00239	phosphoserine aminotransferase 1	107272	AL024078|AL024083|AU040266|D8Ertd814e|EPIP|PSA|Psat
BC016495	chr19	+	18698253	18698602	1.8	0.00253	18697753	18698602	1.49	0.00418	cDNA sequence BC016495	225994	AA408380|D630020N23Rik|MGC25909
Ostf1	chr19	-	18698253	18698602	1.8	0.00253	18697753	18698602	1.49	0.00418	osteoclast stimulating factor 1	20409	C78236|SH3P2|Sh3d3
Rorb	chr19	-	19179234	19179594	2.23	0.000759	19179234	19179594	2.32	0	RAR-related orphan receptor beta	225998	MGC38728|Nr1f2|RZR-beta|RZRB
Klf9	chr19	+	23207288	23207747	1.8	0.00253	23207488	23207937	1.72	0.00144	Kruppel-like factor 9	16601	AA589643|BTEB-1|Bteb1
Pip5k1a	chr19	-	24510632	24510983	2.28	0.000277	24510732	24511081	2.65	0	"phosphatidylinositol-4-phosphate 5-kinase, type 1 alpha"	18719	AI844522|Pipk5a|STM7
Pip5k1a	chr19	-	24511432	24511781	2.04	0.000795	24511432	24511781	2.14	0	"phosphatidylinositol-4-phosphate 5-kinase, type 1 alpha"	18719	AI844522|Pipk5a|STM7
Dock8	chr19	+	25119367	25120216	2.67	0	25119167	25119816	1.49	0.00418	dedicator of cytokinesis 8	76088	1200017A24Rik|5830472H07Rik|A130095G14Rik|AI461977
Smarca2	chr19	+	26815149	26815603	1.89	0.00184	26814849	26815603	1.21	0	"SWI/SNF related, matrix associated, actin dependent regulator of chromatin, subfamily a, member 2"	67155	2610209L14Rik|SNF2alpha|Snf2l2|brahma|brm
C030046E11Rik	chr19	+	29587029	29587387	1.94	0.00102	29587029	29587387	1.39	0.00725	RIKEN cDNA C030046E11 gene	226089	C130057E09Rik
Atad1	chr19	-	32778830	32779382	2.04	0	32778830	32779184	1.81	0.000435	"ATPase family, AAA domain containing 1"	67979	4921525H23Rik|AW107648
Pten	chr19	+	32820323	32820872	2.09	0.000699	32820423	32821282	2	0	phosphatase and tensin homolog	19211	2310035O07Rik|A130070J02Rik|AI463227|MMAC1|TEP1
Ppp1r3c	chr19	-	36801098	36801447	1.6	0.0042	36801098	36801447	1.35	0.00946	"protein phosphatase 1, regulatory (inhibitor) subunit 3C"	53412	PTG|Ppp1r5
Hells	chr19	+	38994794	38995744	1.8	0	38994794	38995944	1.44	0.00544	"helicase, lymphoid specific"	15201	AI323785|E130115I21Rik|LSH|Lysh|PASG|YFK8
Aldh18a1	chr19	-	40642593	40642942	1.8	0.00253	40642593	40642942	2.05	0	"aldehyde dehydrogenase 18 family, member A1"	56454	2810433K04Rik|AI429789|MGC32233|Pycs
Entpd1	chr19	+	40712868	40713825	1.7	0.00331	40712868	40713220	1.67	0.00145	ectonucleoside triphosphate diphosphohydrolase 1	12495	2610206B08Rik|AA408691|Cd39|NTPDase-1
Blnk	chr19	-	41047422	41047771	2.38	0	41047422	41047771	2	0	B-cell linker	17060	BASH|Bca|Ly-57|Ly57|Lyw-57|SLP-65
Blnk	chr19	-	41048822	41049775	2.52	0	41048822	41049174	3.12	0	B-cell linker	17060	BASH|Bca|Ly-57|Ly57|Lyw-57|SLP-65
Pik3ap1	chr19	-	41438490	41438951	1.55	0.0052	41438490	41438951	1.58	0.00239	phosphoinositide-3-kinase adaptor protein 1	83490	1810044J04Rik|BCAP
Mms19l	chr19	-	42034427	42034776	1.7	0.00331	42034327	42034776	1.39	0.00725	MMS19 (MET18 S. cerevisiae)-like	72199	2410001K24Rik|2610042O15Rik|AI316855|C79368|C86341|Mms19
Ubtd1	chr19	+	42034427	42034776	1.7	0.00331	42034327	42034776	1.39	0.00725	ubiquitin domain containing 1	226122	BC016129|MGC28905
LOC435601	chr19	-	45100934	45101783	1.84	0	45100934	45101783	1.39	0.00725	similar to PDZ domain containing 7	435601	-
Sfxn3	chr19	+	45100934	45101783	1.84	0	45100934	45101783	1.39	0.00725	sideroflexin 3	94280	-
Kazald1	chr19	+	45127899	45128248	1.94	0.00102	45127699	45128248	1.44	0.00544	Kazal-type serine peptidase inhibitor domain 1	107250	AI842353|Bono1|IGFBP-rP10
Btrc	chr19	+	45416637	45416986	1.6	0.0042	45416537	45417186	1.67	0.00145	beta-transducin repeat containing protein	12234	Beta-Trcp1|FWD1|Fbw1a|KIAA4123|Slimb|b-TrCP|beta-TrCP|mKIAA4123|mSlimb
4930505N22Rik	chr19	-	46056649	46057098	1.55	0.0052	46056649	46057098	1.63	0.00245	RIKEN cDNA 4930505N22 gene	75056	-
9130011E15Rik	chr19	-	46056649	46057098	1.55	0.0052	46056649	46057098	1.63	0.00245	RIKEN cDNA 9130011E15 gene	71617	AI431055|AW050122
Hps6	chr19	+	46056649	46057098	1.55	0.0052	46056649	46057098	1.63	0.00245	Hermansky-Pudlak syndrome 6	20170	5330434M19Rik|MGC31055|ru
Cuedc2	chr19	-	46391894	46392643	1.84	0	46391894	46392643	1.77	0	CUE domain containing 2	67116	3010002G01Rik
Trim8	chr19	+	46553059	46553408	1.8	0.00253	46553159	46553608	1.35	0.00946	tripartite motif protein 8	93679	AA408830|BB006755|GERP|Rnf27
Pdcd11	chr19	-	47186419	47186768	3.11	0	47186419	47186768	2.6	0	programmed cell death protein 11	18572	1110021I22Rik|ALG-4|Pdcd7|mKIAA0185
Gsto2	chr19	+	47918740	47919189	1.55	0.0052	47918740	47919189	1.35	0.00946	glutathione S-transferase omega 2	68214	1700020F09Rik|4930425C18Rik
BC063749	chr19	-	47971842	47972091	2.57	0	47971842	47972091	2.37	0	cDNA sequence BC063749	414801	KIAA1754|mKIAA1754
D19Ertd652e	chr19	-	47971842	47972091	2.57	0	47971842	47972091	2.37	0	"DNA segment, Chr 19, ERATO Doi 652, expressed"	70806	4632415N18Rik|4930428C11Rik|4930463G05Rik|AI429486
4930506M07Rik	chr19	-	59128116	59128365	2.28	0	59128116	59128365	2	0	RIKEN cDNA 4930506M07 gene	71653	KIAA1598|mKIAA1598
Eif3s10	chr19	-	60845532	60845881	1.94	0.00102	60845132	60845782	1.53	0	"eukaryotic translation initiation factor 3, subunit 10 (theta)"	13669	A830012B05Rik|Csma|Eif3|mKIAA0139
Eif3s10	chr19	+	60845532	60845881	1.94	0.00102	60845132	60845782	1.53	0	"eukaryotic translation initiation factor 3, subunit 10 (theta)"	13669	A830012B05Rik|Csma|Eif3|mKIAA0139
Sfxn4	chr19	-	60916027	60916379	1.84	0.00198	60916027	60916379	1.53	0.00294	sideroflexin 4	94281	MGC107253
5830428H23Rik	chr19	-	61195403	61195752	1.5	0.00597	61195403	61195852	1.35	0.00946	RIKEN cDNA 5830428H23 gene	414758	BC055757
Dclre1c	chr2	+	3340771	3341220	2.86	0	3340871	3341220	3.02	0	"DNA cross-link repair 1C, PSO2 homolog (S. cerevisiae)"	227525	9930121L06Rik|AI661365|Artemis|MGC123409|Snm1l
Meig1	chr2	-	3340771	3341220	2.86	0	3340871	3341220	3.02	0	meiosis expressed gene 1	104362	Meg1
Phyh	chr2	+	4834840	4835189	2.14	0	4834840	4835189	2.34	0	phytanoyl-CoA hydroxylase	16922	AI256161|AI265699|Lnap1|PAHX
Optn	chr2	-	4980460	4980909	2.01	0	4980460	4980712	1.94	0.0031	optineurin	71648	4930441O07Rik|FIP2|HYPL|NRP
Cugbp2	chr2	-	6640977	6641426	1.45	0.00263	6640977	6641326	1.62	0.00235	"CUG triplet repeat, RNA binding protein 2"	14007	B230345P09Rik|C88023|ETR-3|Napor|Napor-2
Dnajc1	chr2	-	18309811	18310160	1.77	0.000805	18309811	18310160	1.4	0.00944	"DnaJ (Hsp40) homolog, subfamily C, member 1"	13418	4733401K02Rik|AA960110|D230036H06Rik|Dnajl1|ERdj1|MTJ1
Apbb1ip	chr2	+	22625328	22625677	2.86	0	22625328	22625677	3.11	0	"amyloid beta (A4) precursor protein-binding, family B, member 1 interacting protein"	54519	9930118P07Rik|Prp48
Apbb1ip	chr2	+	22626428	22626679	1.73	0	22626428	22626679	2.03	0.00367	"amyloid beta (A4) precursor protein-binding, family B, member 1 interacting protein"	54519	9930118P07Rik|Prp48
Acbd5	chr2	+	22890034	22890387	2.14	0	22889934	22890283	1.58	0.00307	acyl-Coenzyme A binding domain containing 5	74159	1300014E15Rik|MGC90942
Acbd5	chr2	+	22891234	22892090	1.89	0.00021	22891234	22891683	1.67	0.00149	acyl-Coenzyme A binding domain containing 5	74159	1300014E15Rik|MGC90942
Noxa1	chr2	-	24917190	24917539	1.29	0.00655	24916890	24917539	1.08	0.00891	NADPH oxidase activator 1	241275	NY-CO-31|SDCCAG31
A830007P12Rik	chr2	-	25017972	25019021	2.46	0	25018372	25018921	2.3	0	RIKEN cDNA A830007P12 gene	227612	MGC7940
A830007P12Rik	chr2	-	25017972	25019021	2.46	0	25017972	25018321	3.07	0	RIKEN cDNA A830007P12 gene	227612	MGC7940
BC029214	chr2	-	25283053	25283402	1.89	0.00021	25283053	25283402	2.21	0	cDNA sequence BC029214	227622	D930050G13Rik|MGC36831
Inpp5e	chr2	-	26232143	26232492	1.53	0.00152	26232143	26232592	1.62	0.00235	inositol polyphosphate-5-phosphatase E	64436	1200002L24Rik|72kDa|mKIAA0123
Gfi1b	chr2	-	28443803	28444158	2.54	0	28443803	28444158	2.3	0	growth factor independent 1B	14582	Gfi-1B
Ttf1	chr2	+	28882152	28882802	1.13	0.00501	28882652	28882909	1.76	0.00445	transcription termination factor 1	22130	-
Wdr34	chr2	-	29870882	29871231	2.06	0	29870882	29871231	2.39	0	WD repeat domain 34	71820	3200002I06Rik|MGC103259
Set	chr2	+	29884401	29884750	1.33	0.00508	29884301	29884650	1.62	0.00235	SET translocation	56086	2610030F17Rik|5730420M11Rik|AA407739|MGC118419|StF-IT-1
Crat	chr2	-	30238708	30239061	1.69	0.000935	30238808	30239157	1.67	0.00149	carnitine acetyltransferase	12908	AW107812|CARAT
Ppp2r4	chr2	+	30238708	30239061	1.69	0.000935	30238808	30239157	1.67	0.00149	"protein phosphatase 2A, regulatory subunit B (PR 53)"	110854	2610042B21Rik|C77440|D12Bwg0916e|MGC60706|MGC7129|N28142|PR 53
2610205E22Rik	chr2	+	30629468	30629817	2.06	0	30629568	30630017	1.58	0.00307	RIKEN cDNA 2610205E22 gene	66617	AL033331|AL033332|MGC25577
Ass1	chr2	+	31294766	31295115	2.7	0	31294766	31295115	2.7	0	argininosuccinate synthetase 1	11898	AA408052|ASS|Ass-1|MGC103151
4933440H19Rik	chr2	+	32273932	32274281	1.93	0.00023	32273732	32274481	1.8	0	RIKEN cDNA 4933440H19 gene	71254	2310007O20Rik
Slc25a25	chr2	-	32273932	32274281	1.93	0.00023	32273732	32274481	1.8	0	"solute carrier family 25 (mitochondrial carrier, phosphate carrier), member 25"	227731	1110030N17Rik|MCSC|MGC36388|mKIAA1896
Cdk9	chr2	-	32536988	32537337	2.06	0	32536988	32537537	1.89	0	cyclin-dependent kinase 9 (CDC2-related kinase)	107951	PITALRE
Sh2d3c	chr2	+	32542531	32543480	1.61	0.00101	32542731	32543480	1.4	0.00944	SH2 domain containing 3C	27387	Chat|MGC130521|Nsp3|Shep1
Traf1	chr2	-	34780173	34780722	1.17	0.0053	34780173	34781122	1.35	0.00597	Tnf receptor-associated factor 1	22029	4732496E14Rik
Traf1	chr2	-	34784873	34785326	1.93	0.00023	34784873	34785326	1.62	0.00235	Tnf receptor-associated factor 1	22029	4732496E14Rik
Traf1	chr2	-	34785573	34785922	3.43	0	34785673	34786022	3.43	0	Tnf receptor-associated factor 1	22029	4732496E14Rik
Cep110	chr2	+	34931294	34932143	1.17	0.00585	34931294	34932051	1.44	0.00724	centrosomal protein 110	26920	6720467O09Rik|AA968343|Cep1|IB3/5|Ma2a8
Ppp6c	chr2	-	39048298	39048954	1.17	0.0053	39048298	39048648	1.62	0.00235	"protein phosphatase 6, catalytic subunit"	67857	2310003C10Rik
Kynu	chr2	+	43377287	43378043	2.5	0	43377287	43378043	2.25	0	kynureninase (L-kynurenine hydrolase)	70789	4432411A05Rik
Arhgap15	chr2	+	43570385	43570735	2.22	0	43570385	43570735	2.66	0	Rho GTPase activating protein 15	76117	5830480G12Rik
A930012O16Rik	chr2	-	57053337	57054386	1.33	0	57053437	57054186	1.53	0	RIKEN cDNA A930012O16 gene	227923	-
Gpd2	chr2	+	57053337	57054386	1.33	0	57053437	57054186	1.53	0	"glycerol phosphate dehydrogenase 2, mitochondrial"	14571	AA408484|AI448216|AU021455|AW494132|GPDH|Gdm1|Gpd-m|Gpdh-m|TISP38
Pscdbp	chr2	-	57975398	57976148	1.29	0	57975198	57975547	1.58	0.00307	"pleckstrin homology, Sec7 and coiled-coil domains, binding protein"	227929	A130053M09Rik|C80816|CYTIP|Cbp|tamalin
Pscdbp	chr2	-	57975398	57976148	1.29	0	57975598	57976657	2.61	0	"pleckstrin homology, Sec7 and coiled-coil domains, binding protein"	227929	A130053M09Rik|C80816|CYTIP|Cbp|tamalin
Pscdbp	chr2	-	57976198	57976657	2.18	0	57975598	57976657	2.61	0	"pleckstrin homology, Sec7 and coiled-coil domains, binding protein"	227929	A130053M09Rik|C80816|CYTIP|Cbp|tamalin
4930578N16Rik	chr2	-	69590960	69591614	1.33	0.00124	69590960	69591309	1.49	0.00592	RIKEN cDNA 4930578N16 gene	75051	4930525K21Rik
Phospho2	chr2	+	69590960	69591614	1.33	0.00124	69590960	69591309	1.49	0.00592	"phosphatase, orphan 2"	73373	1700048E23Rik|AI661517|AU021728|AV006103|Phos2
Agps	chr2	+	75629777	75630126	1.97	0.000266	75629777	75630126	1.58	0.00307	alkylglycerone phosphate synthase	228061	5832437L22|9930035G10Rik|ADAP-S|ADAS|ADHAPS|ADPS|ALDHPSY|AW123847
BC003993	chr2	-	77747055	77747412	1.61	0.00101	77746955	77747304	1.58	0.00307	cDNA sequence BC003993	80744	AA684037|AI173004|AL022752|B230213M24|MGC107219|MGC107450|MGC7531|mKIAA1604
Itga4	chr2	+	79055536	79055890	2.34	0	79055536	79056785	3.02	0	integrin alpha 4	16401	CD49D
Dnajc10	chr2	+	80115715	80116071	2.74	0	80115715	80116071	2.7	0	"DnaJ (Hsp40) homolog, subfamily C, member 10"	66861	1200006L06Rik|D2Ertd706e|ERdj5|JPDI
AI462438	chr2	-	84527958	84528815	1.13	0.00501	84528058	84528607	1.58	0	expressed sequence AI462438	98985	Heab
Ptprj	chr2	-	90384357	90384606	2.26	0	90384357	90384606	1.85	0.00363	"protein tyrosine phosphatase, receptor type, J"	19271	AI450271|BET|Byp|CD148|DEP-1|PTPbeta2|Ptpb2|Scc-1|Scc1
Fnbp4	chr2	+	90546061	90546410	2.06	0	90545961	90546310	2.25	0	formin binding protein 4	55935	FBP30|Fnbp30|mKIAA1014
Slc39a13	chr2	-	90871310	90871759	2.26	0	90871310	90871759	2.57	0	"solute carrier family 39 (metal ion transporter), member 13"	68427	1100001L14Rik|AA387663|MGC118284
Madd	chr2	-	90984737	90985086	2.94	0	90984737	90985086	2.8	0	MAP-kinase activating death domain	228355	9630059K23Rik|IG20
Acp2	chr2	+	91004108	91004459	2.22	0	91004008	91004360	1.53	0.00419	"acid phosphatase 2, lysosomal"	11432	Acp-2|LAP
Arhgap1	chr2	+	91450706	91451055	2.18	0	91450606	91450955	1.98	0	Rho GTPase activating protein 1	228359	B230365D05Rik|C76222|MGC101942|MGC7050|p50rhoGAP
Zfp408	chr2	-	91450706	91451055	2.18	0	91450606	91450955	1.98	0	zinc finger protein 408	381410	Gm1011
1700029I15Rik	chr2	+	92180706	92181155	1.41	0.00366	92180706	92181155	1.49	0.00592	RIKEN cDNA 1700029I15 gene	75641	1700021K07Rik
Cd82	chr2	-	93262685	93263734	1.65	0	93262585	93262934	1.89	0.000203	CD82 antigen	12521	AA682076|AL023070|C33|Kai1|Tspan27
Hsd17b12	chr2	-	93958868	93959317	2.1	0	93958768	93959217	1.94	0	hydroxysteroid (17-beta) dehydrogenase 12	56348	2610510O05Rik|AI172963|KIK-I|Kik1
Cstf3	chr2	+	104391169	104391518	1.65	0.000875	104390969	104391918	1.35	0.00597	"cleavage stimulation factor, 3' pre-RNA, subunit 3"	228410	4732468G05Rik|C79532|MGC6373
Prrg4	chr2	-	104649763	104650012	2.18	0	104649763	104650012	1.76	0.00445	proline rich Gla (G-carboxyglutamic acid) 4 (transmembrane)	228413	9930111I18Rik|MGC117538|TMG4
Nola3	chr2	+	112062696	112063645	1.57	0.00113	112062496	112062945	1.67	0.00149	"nucleolar protein family A, member 3"	66181	1110036B12Rik|NOP10|NOP10P
Nut	chr2	-	112062696	112063645	1.57	0.00113	112062496	112062945	1.67	0.00149	nuclear protein in testis	213765	4932438M10
Slc12a6	chr2	+	112062696	112063645	1.57	0.00113	112062496	112062945	1.67	0.00149	"solute carrier family 12, member 6"	107723	KCC3
Tmem85	chr2	-	112168772	112169123	1.33	0.00508	112168672	112169021	1.4	0.00944	transmembrane protein 85	68032	2610318K02Rik
Arhgap11a	chr2	-	113649004	113649353	2.1	0	113649004	113649353	2.07	0	Rho GTPase activating protein 11A	228482	6530401L14Rik|GAP (1-12)|mKIAA0013
Casc5	chr2	+	118737873	118739122	1.21	0.0017	118737873	118739022	1.35	0.00597	cancer susceptibility candidate 5	76464	2310043D08Rik|5730505K17Rik|MGC91208
LOC623781	chr2	+	118865599	118866048	1.53	0.00152	118865399	118865848	1.8	0.00066	hypothetical protein LOC623781	623781	-
Cep27	chr2	+	120299826	120300875	1.33	0.00439	120300126	120300575	1.53	0.00419	centrosomal protein 27	66296	1700101G24Rik|2410007P03Rik|AU020217
Lrrc57	chr2	-	120299826	120300875	1.33	0.00439	120300126	120300575	1.53	0.00419	leucine rich repeat containing 57	66606	2810002D13Rik|AA407405
Ttbk1	chr2	-	120544619	120545079	1.57	0.00113	120544519	120544970	1.76	0.000905	tau tubulin kinase 1	140810	AI326283|B930008N24Rik|KIAA0847|TTK|Ttbk|mKIAA0847
2310003F16Rik	chr2	+	121148186	121148635	1.69	0.000935	121148186	121148535	1.71	0.00137	RIKEN cDNA 2310003F16 gene	67693	HSPC136|HYPK
LOC574418	chr2	-	121148186	121148635	1.69	0.000935	121148186	121148535	1.71	0.00137	hypothetical LOC574418	574418	-
Eif3s1	chr2	+	121719419	121719768	1.33	0.00508	121719419	121720068	1.76	0.000905	"eukaryotic translation initiation factor 3, subunit 1 alpha"	78655	1810016I04Rik|2700079K05Rik|AA409117|AA409446|C78575|eIF3-alpha|eIF3-p35
B2m	chr2	+	121837977	121839126	1.77	0	121838177	121839426	1.22	0	beta-2 microglobulin	12010	Ly-m11|beta2-m
Gatm	chr2	-	122303083	122303532	1.33	0.00508	122303083	122303532	1.4	0.00944	glycine amidinotransferase (L-arginine:glycine amidinotransferase)	67092	1810003P21Rik|AI314789|AT
2010106G01Rik	chr2	-	126624534	126624984	1.73	0.00105	126624434	126624984	1.71	0.00137	RIKEN cDNA 2010106G01 gene	66552	C130089K23Rik|Sppl2A
Astl	chr2	+	127024749	127025798	1.57	0	127025449	127025798	1.85	0.00018	astacin-like metalloendopeptidase (M12 family)	215095	7420700F21|C87576|MGC76457|Ovastacin
Dusp2	chr2	+	127024749	127025798	1.57	0	127025449	127025798	1.85	0.00018	dual specificity phosphatase 2	13537	PAC1
Astl	chr2	+	127026649	127026998	1.93	0.00023	127026649	127026998	1.85	0.00018	astacin-like metalloendopeptidase (M12 family)	215095	7420700F21|C87576|MGC76457|Ovastacin
Dusp2	chr2	+	127026649	127026998	1.93	0.00023	127026649	127026998	1.85	0.00018	dual specificity phosphatase 2	13537	PAC1
Zc3h8	chr2	-	128634943	128635393	1.57	0.00113	128634943	128635393	1.8	0.00066	zinc finger CCCH type containing 8	57432	AU020882|E130108N08Rik|Fliz1|Zc3hdc8
9430083I22	chr2	+	129064687	129065036	2.01	0	129064887	129065236	1.8	0.00066	hypothetical protein 9430083I22	329514	MGC132797|MGC132798
Il1b	chr2	-	129064687	129065036	2.01	0	129064887	129065236	1.8	0.00066	interleukin 1 beta	16176	IL-1beta|Il-1b
A930025D01Rik	chr2	-	130115555	130115904	1.25	0.00765	130115655	130116104	1.67	0.00149	RIKEN cDNA A930025D01 gene	319513	AI480484
Vps16	chr2	+	130115555	130115904	1.25	0.00765	130115655	130116104	1.67	0.00149	vacuolar protein sorting 16 (yeast)	80743	1810074M16Rik|MGC7352
Ptpra	chr2	+	130140650	130140999	1.93	0.00023	130140550	130140899	1.71	0.00137	"protein tyrosine phosphatase, receptor type, A"	19262	MGC118095|PTP[a]|PTPalpha|Ptpa|RPTR[a]|RPTRalpha
Rnf24	chr2	-	131044516	131045092	1.45	0.00263	131044516	131045286	1.8	0.00066	ring finger protein 24	51902	2810473M14Rik|4930505A13Rik|AI317164|C86507|D2Ertd504e
5730494N06Rik	chr2	-	131943955	131944304	1.33	0.00508	131943855	131944404	1.53	0.00282	RIKEN cDNA 5730494N06 gene	70612	AA407821
Pcna	chr2	-	131943955	131944304	1.33	0.00508	131943855	131944404	1.53	0.00282	proliferating cell nuclear antigen	18538	-
Rbbp9	chr2	-	144245394	144245752	1.73	0	144245394	144245752	1.71	0.00498	retinoblastoma binding protein 9	26450	Bog
Sec23b	chr2	+	144245394	144245752	1.73	0	144245394	144245752	1.71	0.00498	SEC23B (S. cerevisiae)	27054	-
Xrn2	chr2	+	146704123	146704572	1.93	0.00023	146703423	146704572	2.12	0	5'-3' exoribonuclease 2	24128	-
3300002I08Rik	chr2	-	150054356	150054709	1.57	0.00113	150054356	150054709	1.94	0	RIKEN cDNA 3300002I08 gene	69277	2900016H11Rik
Tbc1d20	chr2	+	151985591	151985941	1.85	0.000387	151985591	151985941	1.67	0.00149	"TBC1 domain family, member 20"	67231	1110028I04Rik|2810442O16Rik|AI414693
Kif3b	chr2	+	152982719	152983068	1.81	0.000532	152982619	152983068	1.89	0.000203	kinesin family member 3B	16569	AI854312|AW549267|mKIAA0359
2500004C02Rik	chr2	-	153036442	153037191	1.85	0	153036442	153037191	1.44	0.0036	RIKEN cDNA 2500004C02 gene	72326	-
Asxl1	chr2	+	153036442	153037191	1.85	0	153036442	153037191	1.44	0.0036	additional sex combs like 1 (Drosophila)	228790	DKFZp434N0535|mKIAA0978
Raly	chr2	+	154482076	154482425	1.29	0.00655	154482076	154482425	1.4	0.00944	hnRNP-associated with lethal yellow	19383	AI663842|Merc
4921517L17Rik	chr2	+	156002139	156002690	1.49	0.00206	156002039	156002393	1.62	0.00235	RIKEN cDNA 4921517L17 gene	70873	5430421B09Rik
0610011L14Rik	chr2	+	156238903	156239352	1.49	0.00206	156238903	156239352	1.67	0.00149	RIKEN cDNA 0610011L14 gene	68295	-
Samhd1	chr2	-	156829538	156829789	1.89	0	156829538	156829789	1.85	0.00363	"SAM domain and HD domain, 1"	56045	E330031J07Rik|Mg11
Manbal	chr2	+	157058331	157058693	1.97	0.000266	157058331	157059480	1.35	0	"mannosidase, beta A, lysosomal-like"	69161	1810024K12Rik|AI836500
Ppp1r16b	chr2	+	158357815	158358264	1.49	0.00206	158357815	158358264	2.12	0	"protein phosphatase 1, regulatory (inhibitor) subunit 16B"	228852	ANKRD4|C130078N17Rik|TIMAP|Wdt4
Lpin3	chr2	+	160579499	160579948	1.85	0.000387	160579199	160579749	1.53	0.00282	lipin 3	64899	9130206L11Rik|AA438110|AV236139|KIAA4023|mKIAA4023
5830472M02Rik	chr2	+	163294116	163294465	1.97	0.000266	163294216	163294465	1.67	0.00578	RIKEN cDNA 5830472M02 gene	76080	3110080A02Rik
0610039K10Rik	chr2	+	163334140	163334489	1.89	0	163334140	163334489	2.03	0.00367	RIKEN cDNA 0610039K10 gene	68386	-
Stk4	chr2	+	163765411	163765860	1.45	0.00263	163765411	163765860	1.67	0.00149	serine/threonine kinase 4	58231	AI447339|AU020804|Kas-2|Mst1|Ysk3
Tomm34	chr2	-	163765411	163765860	1.45	0.00263	163765411	163765860	1.67	0.00149	translocase of outer mitochondrial membrane 34	67145	2610100K07Rik|TOM34|Tomm34a|Tomm34b
Wfdc5	chr2	-	163874432	163875182	1.45	0.00263	163874332	163874688	1.89	0.000203	WAP four-disulfide core domain 5	209232	BC019734|PRG5|WAP1
Slpi	chr2	-	164063904	164064353	1.89	0.00021	164063904	164064353	1.8	0.00066	secretory leukocyte peptidase inhibitor	20568	-
Pigt	chr2	+	164187201	164187650	1.41	0.00366	164187201	164187951	1.85	0.00018	"phosphatidylinositol glycan, class T"	78928	4930534E15Rik|CGI-06|NDAP|Ndap7
Cd40	chr2	+	164746190	164746539	2.01	0	164746290	164746639	2.25	0	CD40 antigen	21939	AI326936|Bp50|GP39|HIGM1|IGM|IMD3|T-BAM|TRAP|Tnfrsf5|p50
Stau1	chr2	-	166687658	166688107	1.69	0.000935	166687658	166688107	1.4	0.00376	staufen (RNA binding protein) homolog 1 (Drosophila)	20853	5830401L18Rik|AW549911|C85792|Stau
1500012F01Rik	chr2	+	166751480	166751929	1.93	0.00023	166751580	166751929	1.94	0	RIKEN cDNA 1500012F01 gene	68949	-
AI481105	chr2	-	166751480	166751929	1.93	0.00023	166751580	166751929	1.94	0	expressed sequence AI481105	98999	-
Spata2	chr2	-	167184185	167184634	1.53	0	167184185	167184534	1.44	0.00724	spermatogenesis associated 2	263876	AI504642|MGC38980|mKIAA0757
Zfp313	chr2	+	167184185	167184634	1.53	0	167184185	167184534	1.44	0.00724	zinc finger protein 313	81018	1110008J21Rik|AI225886|AW549494|Zfp228|Znf228
Snai1	chr2	+	167228619	167228976	1.37	0.00443	167228619	167228976	1.85	0.00018	snail homolog 1 (Drosophila)	20613	AI194338|Sna|Snail
Nfatc2	chr2	-	168281816	168282165	1.93	0.00023	168281816	168282465	1.89	0.000203	"nuclear factor of activated T-cells, cytoplasmic, calcineurin-dependent 2"	18019	AI607462|NFAT1|NFAT1-D|Nfatp
Rnpc1	chr2	+	172665290	172665539	1.85	0	172665290	172665539	1.8	0.00351	"RNA-binding region (RNP1, RRM) containing 1"	56190	Seb4|Seb4l
Ctsz	chr2	-	174082381	174082730	1.69	0.000935	174082381	174082730	1.98	0	cathepsin Z	64138	AI787083|AU019819|CTSX|D2Wsu143e
2310003C23Rik	chr2	+	180640057	180640514	2.18	0	180640257	180640608	2.52	0	RIKEN cDNA 2310003C23 gene	76425	-
Dido1	chr2	-	180640057	180640514	2.18	0	180640257	180640608	2.52	0	death inducer-obliterator 1	23856	6720461J16Rik|C530043I07|D130048F08Rik|DIO-1|Datf1|Dido2|Dido3|mKIAA0333
BC051628	chr2	+	181148926	181149675	0.97	0.00509	181149326	181149675	1.53	0.00419	cDNA sequence BC051628	332713	1700026M20Rik|MGC58365
Gmeb2	chr2	-	181217497	181217846	1.25	0.00765	181217497	181217846	1.76	0.000905	glucocorticoid modulatory element binding protein 2	229004	AI839884
LOC665467	chr2	+	181217497	181217846	1.25	0.00765	181217497	181217846	1.76	0.000905	hypothetical protein LOC665467	665467	-
Gm632	chr2	-	181527805	181528254	1.29	0.00655	181527805	181528254	1.49	0.00592	"gene model 632, (NCBI)"	269401	-
Prpf6	chr2	+	181527805	181528254	1.29	0.00655	181527805	181528254	1.49	0.00592	PRP6 pre-mRNA splicing factor 6 homolog (yeast)	68879	1190003A07Rik|2610031L17Rik|ANT-1|MGC11655|MGC36967|MGC38351|U5-102K
Samd10	chr2	-	181527805	181528254	1.29	0.00655	181527805	181528254	1.49	0.00592	sterile alpha motif domain containing 10	229011	D930033N23Rik|E130318E08
Cp	chr3	+	20146154	20146511	2.32	0	20146154	20147506	1.9	0	ceruloplasmin	12870	D3Ertd555e
Aadacl1	chr3	+	27373826	27374175	2.24	0	27373826	27374175	2.13	0	arylacetamide deacetylase-like 1	320024	B230106I24Rik|CPO-BP
Skil	chr3	+	31284588	31284941	1.86	0.000805	31284488	31284837	1.9	0.00018	SKI-like	20482	9130011J04Rik|Skir|SnoN|SnoN2|sno|sno-dE3
Mrpl47	chr3	-	32928261	32928610	2.03	0.00023	32928361	32928810	1.99	0	mitochondrial ribosomal protein L47	74600	4833424P18Rik|CGI-204|MTF/L47|NCM1
Ndufb5	chr3	+	32928261	32928610	2.03	0.00023	32928361	32928810	1.99	0	"NADH dehydrogenase (ubiquinone) 1 beta subcomplex, 5"	66046	0610007D05Rik|AU015782|SGDH
Acad9	chr3	+	36256162	36256511	2.03	0.00023	36256162	36256511	2.27	0	"acyl-Coenzyme A dehydrogenase family, member 9"	229211	2600017P15Rik|4732402K02|C630012L17Rik|NPD002
Ufm1	chr3	-	53951851	53952208	1.65	0.00113	53951851	53952208	1.71	0.00149	ubiquitin-fold modifier 1	67890	1810045K17Rik|AI132708|AI463323
Gm410	chr3	-	57779816	57780170	2.58	0	57779816	57780170	2.78	0	"gene model 410, (NCBI)"	242037	-
Rnf13	chr3	+	57823844	57824193	1.48	0.00366	57823644	57824093	1.44	0.00944	ring finger protein 13	24017	2010001H16Rik|Rzf
P2ry12	chr3	-	59316778	59317135	2.28	0	59316578	59317027	1.39	0.00597	"purinergic receptor P2Y, G-protein coupled 12"	70839	2900079B22Rik|4921504D23Rik|P2Y12
Gmps	chr3	+	64063870	64064219	1.31	0.00765	64063970	64064719	1.07	0.00211	guanine monphosphate synthetase	229363	AA591640|AI047208
Kpna4	chr3	-	69215066	69215418	1.69	0.00101	69215066	69215915	1.3	0.00114	karyopherin (importin) alpha 4	16649	1110058D08Rik|IPOA3
Pdcd10	chr3	-	75642644	75643193	1.48	0	75642644	75642993	1.48	0.00724	programmed cell death 10	56426	2410003B13Rik|MGC102058|Tfa15|Tfar15
Serpini1	chr3	+	75642644	75643193	1.48	0	75642644	75642993	1.48	0.00724	"serine (or cysteine) peptidase inhibitor, clade I, member 1"	20713	AI837402|PI12|Spi17
Pet112l	chr3	+	85659695	85660044	1.65	0.00113	85659695	85660144	1.44	0.00944	PET112-like (yeast)	229487	9430026F02Rik|MGC11629
Fcrl1	chr3	+	87462124	87462473	1.48	0.00366	87461724	87462073	2.08	0	Fc receptor-like 1	229499	A230020G22Rik|BXMAS1|BXMAS1-like|FcRH1L|FcRH1S|Fcrh1|IFGP1|mBXMH1b|moFcRH1L|moFcRH1S
Prcc	chr3	-	87971539	87971888	1.73	0.000875	87971539	87971888	1.44	0.00944	papillary renal cell carcinoma (translocation-associated)	94315	-
BC023814	chr3	-	88015290	88015539	1.86	0	88015290	88015539	1.99	0.0031	cDNA sequence BC023814	229503	MGC38548
Isg20l2	chr3	+	88015290	88015539	1.86	0	88015290	88015539	1.99	0.0031	interferon stimulated exonuclease gene 20-like 2	229504	4930429N24|C80587
Mef2d	chr3	+	88227492	88227941	1.9	0.000532	88227492	88227841	1.62	0.00307	myocyte enhancer factor 2D	17261	C80750|MGC31718
Mapbpip	chr3	-	88638041	88639201	1.14	0.00672	88638041	88638590	1.53	0.00592	mitogen activated protein binding protein interacting protein	83409	2010111E04Rik|AL022628|P14|Rab25
Rab25	chr3	-	88638041	88639201	1.14	0.00672	88638041	88638590	1.53	0.00592	"RAB25, member RAS oncogene family"	53868	AV012978
Ubqln4	chr3	+	88638041	88639201	1.14	0.00672	88638041	88638590	1.53	0.00592	ubiquilin 4	94232	A1u|AI663987|UBIN
Arhgef2	chr3	+	88706814	88707163	1.52	0.00263	88706914	88707263	2.08	0	rho/rac guanine nucleotide exchange factor (GEF) 2	16800	AA408978|GEF|GEF-H1|GEFH1|LFP40|Lbcl1|Lfc|P40|mKIAA0651
2810403A07Rik	chr3	+	88771397	88771746	1.39	0.00508	88771397	88771746	1.85	0.00066	RIKEN cDNA 2810403A07 gene	74200	A430106P18Rik|AI256352|AI451678
Msto1	chr3	-	88999861	89000210	1.48	0.00366	88999661	89000317	1.3	0.00114	misato homolog 1 (Drosophila)	229524	BC008103|FLJ10504|MGC11722|MGC118015|mst
Rusc1	chr3	-	89175799	89176048	1.82	0	89175799	89176048	1.62	0.00987	RUN and SH3 domain containing 1	72296	2210403N08Rik|AA408288|NESCA
Cks1b	chr3	-	89504213	89504762	1.61	0	89503513	89504662	1.76	0	CDC28 protein kinase 1b	54124	2410005G18Rik|2610005D03Rik|AA407784|Cks1|sid1334
Shc1	chr3	+	89504213	89504762	1.61	0	89503513	89504662	1.76	0	src homology 2 domain-containing transforming protein C1	20416	Shc|ShcA|p66
Pbxip1	chr3	+	89523276	89523625	2.49	0	89522676	89523625	2.64	0	pre-B-cell leukemia transcription factor interacting protein 1	229534	4732463H20Rik|MGC38361
Adar	chr3	+	89816260	89816709	1.65	0	89816360	89816709	1.81	0.000905	"adenosine deaminase, RNA-specific"	56417	AV242451|Adar1|mZaADAR
Jtb	chr3	+	90317110	90317459	1.48	0.00366	90317110	90317459	1.48	0.00724	jumping translocation breakpoint	23922	Gm622
Dennd4b	chr3	+	90350611	90350960	1.9	0.000532	90350611	90350960	2.22	0	DENN/MADD domain containing 4B	229541	BC026996|mKIAA0476
Dennd4b	chr3	+	90351511	90351960	1.48	0.00366	90351511	90351960	2.45	0	DENN/MADD domain containing 4B	229541	BC026996|mKIAA0476
S100a10	chr3	+	93637817	93638166	2.2	0	93637817	93638166	2.18	0	S100 calcium binding protein A10 (calpactin)	20194	42C|AA409961|AL024248|CAL12|CLP11|Cal1l|p10|p11
Sema6c	chr3	+	95244977	95245626	1.73	0.000875	95244677	95245130	1.57	0.00419	"sema domain, transmembrane domain (TM), and cytoplasmic domain, (semaphorin) 6C"	20360	Semay|mKIAA1869
Gabpb2	chr3	-	95303163	95303612	1.73	0.000875	95303163	95303512	1.53	0.00592	"GA repeat binding protein, beta 2"	213054	5830427M07|9430006E19Rik|A430024B14Rik|Gabpb2-1
Cdc42se1	chr3	+	95315045	95316297	2.03	0	95314445	95316297	1.76	0	CDC42 small effector 1	57912	1300002M12Rik|AW558204|Cdcse1|SCIP1|Spec1
Mllt11	chr3	-	95315045	95316297	2.03	0	95314445	95316297	1.76	0	"myeloid/lymphoid or mixed-lineage leukemia (trithorax homolog, Drosophila)%3B translocated to, 11"	56772	AI839562|Af1q|Zfp692
Ctss	chr3	+	95611939	95612400	2.71	0	95612039	95612400	2.32	0	cathepsin S	13040	-
Tarsl1	chr3	-	95840217	95840571	1.94	0.000387	95839817	95840571	1.71	0.00149	threonyl-tRNA synthetase-like 1	71807	2610024N01Rik|AI429208
Aph1a	chr3	+	95978964	95979413	1.9	0.000532	95978964	95979413	1.9	0.00018	anterior pharynx defective 1a homolog (C. elegans)	226548	6530402N02Rik|MGC36389|MGC7221
BC028528	chr3	-	95978964	95979413	1.9	0.000532	95978964	95979413	1.9	0.00018	cDNA sequence BC028528	229600	L259|MGC41379
Hist2h2ab	chr3	-	96305070	96306519	1.1	0	96304670	96307419	1.07	0	"histone 2, H2ab"	319175	H2a-613a
Hist2h2ac	chr3	-	96305070	96306519	1.1	0	96304670	96307419	1.07	0	"histone 2, H2ac"	319176	H2a-613b
Hist2h2be	chr3	+	96305070	96306519	1.1	0	96304670	96307419	1.07	0	"histone 2, H2be"	319190	AV127319|H2b-613|T25626
LOC621893	chr3	+	96305070	96306519	1.1	0	96304670	96307419	1.07	0	similar to histone H2A	621893	-
Hist2h2aa1	chr3	+	96331317	96331666	1.44	0.00443	96330517	96331666	1.2	0	"histone 2, H2aa1"	15267	AI448581|H2a-615|Hist2
Hist2h2aa2	chr3	+	96331317	96331666	1.44	0.00443	96330517	96331666	1.2	0	"histone 2, H2aa2"	319192	H2a-614
Hist2h3c1	chr3	+	96331317	96331666	1.44	0.00443	96330517	96331666	1.2	0	"histone 2, H3c1"	15077	BE691662|H3-615|H3f2|Hist2h3ca1
LOC668527	chr3	-	97746574	97746923	1.78	0.000935	97746574	97746923	2.22	0	hypothetical protein LOC668527	668527	-
Capza1	chr3	-	104991942	104992391	1.94	0.000387	104991942	104992391	1.67	0.00235	"capping protein (actin filament) muscle Z-line, alpha 1"	12340	CAPZ|CAZ1|Cappa1
St7l	chr3	+	104991942	104992391	1.94	0.000387	104991942	104992391	1.67	0.00235	suppression of tumorigenicity 7-like	229681	MGC130399|St7r
Capza1	chr3	-	104992542	104993091	1.35	0.00156	104992542	104993091	1.53	0.00418	"capping protein (actin filament) muscle Z-line, alpha 1"	12340	CAPZ|CAZ1|Cappa1
St7l	chr3	+	104992542	104993091	1.35	0.00156	104992542	104993091	1.53	0.00418	suppression of tumorigenicity 7-like	229681	MGC130399|St7r
1700027A23Rik	chr3	-	106129003	106129452	1.78	0.000935	106129003	106129352	1.81	0.000905	RIKEN cDNA 1700027A23 gene	76420	MGC58817
Chi3l4	chr3	-	106349670	106350022	1.73	0.000875	106349770	106350127	1.81	0.000905	chitinase 3-like 4	104183	Ym2
Tmem77	chr3	+	106672832	106673181	1.61	0.00152	106672732	106673090	1.44	0.00944	transmembrane protein 77	67171	2010305N14Rik|2610318G18Rik|AI647667
4933421E11Rik	chr3	+	106849587	106850236	2.16	0	106849587	106850136	2.22	0	RIKEN cDNA 4933421E11 gene	321000	2010012G17Rik|AI450568|Rif1
Cd53	chr3	-	106918008	106918366	3.51	0	106918008	106918366	3.24	0	CD53 antigen	12508	AI323659|Ox-44|Tspan25
AI504432	chr3	+	107166128	107166580	3.34	0	107166228	107166580	3.47	0	expressed sequence AI504432	229694	A230102G19
Gnai3	chr3	-	108274169	108274518	1.44	0.00443	108274169	108274518	1.81	0.000905	"guanine nucleotide binding protein, alpha inhibiting 3"	14679	AI158965|AW537698|Gnai-3
Psma5	chr3	+	108384920	108385669	1.82	0.00105	108384920	108385269	2.04	0	"proteasome (prosome, macropain) subunit, alpha type 5"	26442	MGC102091|MGC118067|ZETA
2010200O16Rik	chr3	-	108690081	108690630	1.35	0.00655	108690081	108690630	1.71	0.00149	RIKEN cDNA 2010200O16 gene	67495	-
Prpf38b	chr3	-	109039525	109040374	0.93	0.00853	109039625	109040074	1.57	0.00419	PRP38 pre-mRNA processing factor 38 (yeast) domain containing B	66921	1110021E09Rik|AU018955
Dbt	chr3	+	116505157	116505808	1.48	0	116504757	116505511	0.97	0.00679	dihydrolipoamide branched chain transacylase E2	13171	D3Wsu60e
A930028L21Rik	chr3	-	116586361	116586810	1.56	0.00206	116586261	116586810	1.9	0	RIKEN cDNA A930028L21 gene	229780	A330067P21
Sass6	chr3	+	116586361	116586810	1.56	0.00206	116586261	116586810	1.9	0	spindle assembly 6 homolog (C. elegans)	72776	2810453L12Rik
Usp53	chr3	-	122975719	122976069	2.11	0	122975719	122976568	1.95	0.000203	ubiquitin specific peptidase 53	99526	AA939927|Phxr3|Sp6|mKIAA1350
1100001I22Rik	chr3	-	130719598	130720048	1.65	0.00113	130719498	130719850	1.53	0.00592	RIKEN cDNA 1100001I22 gene	68436	MGC103270|RPL34
Gstcd	chr3	-	133030336	133030685	2.11	0	133030336	133030685	2.32	0	"glutathione S-transferase, C-terminal domain containing"	67553	4933434L15Rik|MGC74393
Ppa2	chr3	+	133247871	133248120	2.45	0	133247871	133248120	2.55	0	pyrophosphatase (inorganic) 2	74776	1110013G13Rik|MGC6539|Sid6306
Manba	chr3	+	135422804	135423153	1.82	0.00105	135422804	135423153	1.76	0.00137	"mannosidase, beta A, lysosomal"	110173	2410030O07Rik|B930014J03Rik|Bmn
Nfkb1	chr3	-	135545483	135545932	2.28	0	135545483	135545932	2.04	0	"nuclear factor of kappa light chain gene enhancer in B-cells 1, p105"	18033	NF-KB1|NF-kappaB|NF-kappaB1|p105|p50|p50/p105
Dapp1	chr3	-	137918663	137919116	2.96	0	137918663	137919116	2.78	0	dual adaptor for phosphotyrosine and 3-phosphoinositides 1	26377	Bam32
9830147J24Rik	chr3	+	142467479	142467828	2.24	0	142467479	142467828	2.5	0	RIKEN cDNA 9830147J24 gene	229900	-
Gbp4	chr3	+	142497790	142498139	1.78	0.000935	142497790	142498139	2.13	0	guanylate nucleotide binding protein 4	55932	AW228655|Gbp3
4930597L12Rik	chr3	-	153413290	153413743	2.75	0	153413290	153413639	1.62	0.00307	RIKEN cDNA 4930597L12 gene	75385	-
St6galnac3	chr3	-	153663654	153664005	1.82	0.00105	153663454	153663906	1.67	0.00235	"ST6 (alpha-N-acetyl-neuraminyl-2,3-beta-galactosyl-1,3)-N-acetylgalactosaminide alpha-2,6-sialyltransferase 3"	20447	Siat7c
Lyn	chr4	+	3605025	3605474	1.7	0.000875	3605025	3605474	1.6	0.00307	Yamaguchi sarcoma viral (v-yes-1) oncogene homolog	17096	AA407514|Hck-2
Trp53inp1	chr4	+	11083700	11084053	1.95	0.00021	11083800	11084149	1.88	0.00018	transformation related protein 53 inducible nuclear protein 1	60599	2700057G22Rik|SIP|SIP18|SIP27|Stinp|Teap
E130016E03Rik	chr4	+	11505858	11506607	1.53	0	11506258	11506607	2.06	0	RIKEN cDNA E130016E03 gene	623474	Fsbp|MGC67261|Rad54b
Cdh17	chr4	+	11685011	11685873	1.7	0.000875	11685011	11685873	1.42	0.00944	cadherin 17	12557	HPT-1|HPT-1/LI
C430048L16Rik	chr4	+	12016385	12016934	1.37	0.00124	12016585	12016934	1.69	0.00149	RIKEN cDNA C430048L16 gene	77604	AV299215|MGC91091
Tmem67	chr4	-	12016385	12016934	1.37	0.00124	12016585	12016934	1.69	0.00149	transmembrane protein 67	329795	5330408M12Rik|B230117O07
Rbm12b	chr4	+	12067454	12067803	1.78	0.00105	12067554	12067903	1.88	0.00018	RNA binding motif protein 12B	72397	3000004N20Rik
Casp8ap2	chr4	+	32943690	32944039	2.36	0	32943690	32944039	2.61	0	caspase 8 associated protein 2	26885	D4Ertd659e|FLASH|mKIAA1315
Dnaja1	chr4	+	40910853	40911202	1.66	0.00101	40910853	40911202	1.88	0.00018	"DnaJ (Hsp40) homolog, subfamily A, member 1"	15502	Hsj2|Nedd7
LOC622208	chr4	-	40910853	40911202	1.66	0.00101	40910853	40911202	1.88	0.00018	hypothetical LOC622208	622208	-
Ubap1	chr4	+	41537559	41537908	2.03	0.000266	41537559	41537908	1.79	0.000905	ubiquitin-associated protein 1	67123	2700092A01Rik|NAG20|Ubap
4930417M19Rik	chr4	+	43288108	43288464	1.45	0.00366	43288108	43288464	1.51	0.00592	RIKEN cDNA 4930417M19 gene	320571	-
Cd72	chr4	-	43475709	43476158	1.95	0.00021	43475709	43476158	1.92	0.000203	CD72 antigen	12517	CD72c|Ly-19|Ly-32|Ly-m19|Lyb-2
Creb3	chr4	+	43580918	43581867	2.36	0	43580918	43581767	2.29	0	cAMP responsive element binding protein 3	12913	AU044960|AW538053|C80076|LZIP-1|LZIP-2|Luman
Creb3	chr4	+	43583218	43583677	1.91	0.000387	43582318	43583677	1.79	0	cAMP responsive element binding protein 3	12913	AU044960|AW538053|C80076|LZIP-1|LZIP-2|Luman
Tln1	chr4	-	43583218	43583677	1.91	0.000387	43582318	43583677	1.79	0	talin 1	21894	Tln
1110029E03Rik	chr4	+	43598578	43598927	2.03	0.000266	43598578	43598927	1.92	0.000203	RIKEN cDNA 1110029E03 gene	242406	AI527196|F730001J03|mKIAA0258
Gba2	chr4	-	43598578	43598927	2.03	0.000266	43598578	43598927	1.92	0.000203	glucosidase beta 2	230101	F630034E04
Clta	chr4	+	44033383	44033732	2.53	0	44033483	44033932	1.74	0.00137	"clathrin, light polypeptide (Lca)"	12757	AV026556
Clta	chr4	+	44034183	44034432	1.58	0.00526	44034183	44034432	2.2	0.00159	"clathrin, light polypeptide (Lca)"	12757	AV026556
1700055D18Rik	chr4	+	45033684	45034133	2.03	0.000266	45033584	45034133	2.11	0	RIKEN cDNA 1700055D18 gene	73405	-
Zbtb5	chr4	-	45033684	45034133	2.03	0.000266	45033584	45034133	2.11	0	zinc finger and BTB domain containing 5	230119	5930421I10|9430083K24Rik|AI646847|KIAA0354|mKIAA0354
E230008N13Rik	chr4	+	45910929	45911378	1.66	0.00101	45910929	45911378	1.46	0.00724	RIKEN cDNA E230008N13 gene	381522	Gm1025
LOC634450	chr4	+	46596493	46596950	1.33	0.00655	46596393	46596744	1.88	0.00018	superantigen 3	634450	VSAG1|VSAG6
Rod1	chr4	-	59644373	59644731	1.99	0.00023	59644373	59644928	2.24	0	ROD1 regulator of differentiation 1 (S. pombe)	230257	5830471K22Rik|AA407443|AI462022|AW107884|C86549|MGC11742
1110054O05Rik	chr4	-	59877359	59878008	1.33	0	59877759	59878108	1.92	0.000203	RIKEN cDNA 1110054O05 gene	66209	2610312O17Rik|AA399876
1110054O05Rik	chr4	-	59877359	59878008	1.33	0	59877259	59877508	2.11	0.00263	RIKEN cDNA 1110054O05 gene	66209	2610312O17Rik|AA399876
Snx30	chr4	+	59897553	59897806	2.32	0	59897453	59897806	2.61	0	sorting nexin family member 30	209131	4732481H14Rik|C030041J06Rik|MGC106086
Snx30	chr4	+	59898777	59899526	2.57	0	59898877	59899331	1.88	0	sorting nexin family member 30	209131	4732481H14Rik|C030041J06Rik|MGC106086
Mup1	chr4	-	60163649	60163998	1.66	0.00101	60163649	60163998	1.83	0.00066	major urinary protein 1	17840	2610016E04Rik|Ltn-1|Lvtn-1|Mup-1|Mup-a|Up-1
Mup1	chr4	-	60233135	60233484	1.37	0.00508	60233135	60233484	2.01	0	major urinary protein 1	17840	2610016E04Rik|Ltn-1|Lvtn-1|Mup-1|Mup-a|Up-1
Mup2	chr4	-	60233135	60233484	1.37	0.00508	60233135	60233484	2.01	0	major urinary protein 2	17841	AA589603|MGC117823|Mup-2
Mup1	chr4	-	60475497	60475846	1.37	0.00508	60475497	60475846	1.97	0	major urinary protein 1	17840	2610016E04Rik|Ltn-1|Lvtn-1|Mup-1|Mup-a|Up-1
Mup2	chr4	-	60475497	60475846	1.37	0.00508	60475497	60475846	1.97	0	major urinary protein 2	17841	AA589603|MGC117823|Mup-2
Mup1	chr4	-	60555600	60555958	2.61	0	60555600	60555958	2.47	0	major urinary protein 1	17840	2610016E04Rik|Ltn-1|Lvtn-1|Mup-1|Mup-a|Up-1
Mup1	chr4	-	60635948	60636297	1.58	0.00152	60635948	60636297	2.15	0	major urinary protein 1	17840	2610016E04Rik|Ltn-1|Lvtn-1|Mup-1|Mup-a|Up-1
Mup2	chr4	-	60635948	60636297	1.58	0.00152	60635948	60636297	2.15	0	major urinary protein 2	17841	AA589603|MGC117823|Mup-2
Mup1	chr4	-	60789322	60789671	1.7	0.000875	60789322	60789671	2.06	0	major urinary protein 1	17840	2610016E04Rik|Ltn-1|Lvtn-1|Mup-1|Mup-a|Up-1
Mup2	chr4	-	60789322	60789671	1.7	0.000875	60789322	60789671	2.06	0	major urinary protein 2	17841	AA589603|MGC117823|Mup-2
Mup1	chr4	-	60865117	60865377	1.82	0	60865117	60865377	2.43	0	major urinary protein 1	17840	2610016E04Rik|Ltn-1|Lvtn-1|Mup-1|Mup-a|Up-1
LOC621078	chr4	+	61004978	61005337	2.28	0	61004978	61005337	2.47	0	hypothetical LOC621078	621078	-
Mup1	chr4	-	61004978	61005337	2.28	0	61004978	61005337	2.47	0	major urinary protein 1	17840	2610016E04Rik|Ltn-1|Lvtn-1|Mup-1|Mup-a|Up-1
Mup2	chr4	-	61004978	61005337	2.28	0	61004978	61005337	2.47	0	major urinary protein 2	17841	AA589603|MGC117823|Mup-2
Mup1	chr4	-	61081278	61081636	2.53	0	61081278	61081636	2.7	0	major urinary protein 1	17840	2610016E04Rik|Ltn-1|Lvtn-1|Mup-1|Mup-a|Up-1
Mup1	chr4	-	61159681	61160030	1.95	0.00021	61159681	61160030	1.83	0.00066	major urinary protein 1	17840	2610016E04Rik|Ltn-1|Lvtn-1|Mup-1|Mup-a|Up-1
Mup2	chr4	-	61159681	61160030	1.95	0.00021	61159681	61160030	1.83	0.00066	major urinary protein 2	17841	AA589603|MGC117823|Mup-2
Mup1	chr4	-	61267814	61268163	1.74	0.000935	61267814	61268163	2.06	0	major urinary protein 1	17840	2610016E04Rik|Ltn-1|Lvtn-1|Mup-1|Mup-a|Up-1
Mup2	chr4	-	61267814	61268163	1.74	0.000935	61267814	61268163	2.06	0	major urinary protein 2	17841	AA589603|MGC117823|Mup-2
MGC107671	chr4	-	61445590	61445852	1.53	0.00516	61445590	61446239	1.69	0.00149	similar to alpha-2u-globulin V precursor - mouse	381530	MGC103310
MGC107671	chr4	-	61539728	61539990	1.53	0.00516	61539728	61540377	1.42	0.00944	similar to alpha-2u-globulin V precursor - mouse	381530	MGC103310
Slc31a1	chr4	+	61844159	61844509	2.12	0	61844159	61844509	1.51	0.00592	"solute carrier family 31, member 1"	20529	4930445G01Rik|AI787263|AU016967|Ctr1
C430014M02Rik	chr4	-	61845959	61846908	1.62	0.00113	61846559	61847208	1.56	0	RIKEN cDNA C430014M02 gene	338355	KIAA0674|mKIAA0674
Slc31a1	chr4	+	61845959	61846908	1.62	0.00113	61846559	61847208	1.56	0	"solute carrier family 31, member 1"	20529	4930445G01Rik|AI787263|AU016967|Ctr1
Cdc26	chr4	-	61894337	61895186	1.41	0.00142	61894337	61895386	1.33	0.00526	cell division cycle 26	66440	2010012C09Rik|MGC130281
Prpf4	chr4	+	61894337	61895186	1.41	0.00142	61894337	61895386	1.33	0.00526	PRP4 pre-mRNA processing factor 4 homolog (yeast)	70052	1600015H11Rik|AI874830|MGC117717|bN189G18.1
Rnf183	chr4	-	61917075	61917431	2.45	0	61917075	61917431	2.11	0	ring finger protein 183	76072	5830442J12Rik
Bspry	chr4	+	61967024	61967773	1.2	0.00301	61967224	61967773	1.33	0.00526	B-box and SPRY domain containing	192120	-
AI597013	chr4	-	62885851	62886200	1.33	0.00655	62885451	62886000	1.51	0.00592	expressed sequence AI597013	100182	MGC116630|mKIAA1968
Tlr4	chr4	+	66313842	66314191	2.9	0	66313842	66314191	3.02	0	toll-like receptor 4	21898	Lps|Ly87|Ran/M1|Rasl2-8
Ifnz	chr4	+	88247329	88247678	1.29	0.00765	88247329	88247678	1.42	0.00944	interferon zeta	319146	6030405N23Rik|BGIF|Lmtn
LOC545647	chr4	+	88247329	88247678	1.29	0.00765	88247329	88247678	1.42	0.00944	similar to interferon zeta	545647	-
LOC545648	chr4	+	88247329	88247678	1.29	0.00765	88247329	88247678	1.42	0.00944	similar to interferon zeta	545648	-
Ifnz	chr4	+	88256131	88256480	1.33	0.00655	88256031	88256580	1.24	0.00211	interferon zeta	319146	6030405N23Rik|BGIF|Lmtn
LOC545649	chr4	+	88256131	88256480	1.33	0.00655	88256031	88256580	1.24	0.00211	similar to interferon zeta	545649	-
LOC545650	chr4	+	88256131	88256480	1.33	0.00655	88256031	88256580	1.24	0.00211	similar to interferon zeta	545650	-
Ifnz	chr4	+	88273759	88274508	1.08	0.0039	88273759	88274408	1.14	0.00446	interferon zeta	319146	6030405N23Rik|BGIF|Lmtn
LOC545655	chr4	+	88273759	88274508	1.08	0.0039	88273759	88274408	1.14	0.00446	similar to interferon zeta	545655	-
LOC668208	chr4	+	88273759	88274508	1.08	0.0039	88273759	88274408	1.14	0.00446	similar to interferon zeta	668208	-
Nfia	chr4	+	97264050	97264499	1.41	0.00443	97263750	97264499	1.42	0.00376	nuclear factor I/A	18027	1110047K16Rik|9430022M17Rik|NF1-A
Inadl	chr4	+	97928929	97929385	1.99	0.00023	97928729	97929385	1.97	0	InaD-like (Drosophila)	12695	Cipp|Patj
Pde4b	chr4	+	102066328	102067586	1.29	0.00765	102066828	102067278	1.46	0.00724	"phosphodiesterase 4B, cAMP specific"	18578	Dpde4|R74983|TCRB|dunce
Pars2	chr4	+	106148779	106149328	1.62	0.00113	106148979	106149428	1.74	0.00137	prolyl-tRNA synthetase (mitochondrial)(putative)	230577	BC027073|MGC47008
Ssbp3	chr4	+	106407851	106408700	1.41	0.00443	106407851	106408600	1.51	0.00592	single-stranded DNA binding protein 3	72475	2610021L12Rik|2610200M23Rik|5730488C10Rik|AI854733|AW551939|LAST|SSDP1
2210012G02Rik	chr4	-	106676073	106676422	1.99	0.00023	106675973	106676822	2.15	0	RIKEN cDNA 2210012G02 gene	66526	2210010B22Rik
Tmem59	chr4	+	106676073	106676422	1.99	0.00023	106675973	106676822	2.15	0	transmembrane protein 59	56374	1110001M20Rik|3110046P06Rik|AI256529|D4Ertd20e|MTDCF1|ORF18
2210012G02Rik	chr4	-	106677173	106677522	1.29	0.00765	106677173	106677727	1.37	0.00597	RIKEN cDNA 2210012G02 gene	66526	2210010B22Rik
Tmem59	chr4	+	106677173	106677522	1.29	0.00765	106677173	106677727	1.37	0.00597	transmembrane protein 59	56374	1110001M20Rik|3110046P06Rik|AI256529|D4Ertd20e|MTDCF1|ORF18
Scp2	chr4	-	107616481	107616838	1.62	0.00113	107616481	107616838	1.69	0.00149	"sterol carrier protein 2, liver"	20280	AA409774|AA409893|C76618|C79031|NSL-TP|SCP-2|SCPx|ns-LTP
Zcchc11	chr4	+	107955607	107957356	1.78	0.00105	107956107	107956470	2.15	0	"zinc finger, CCHC domain containing 11"	230594	6030404K05Rik|KIAA0191|PPAPD3|mKIAA0191
Nrd1	chr4	+	108498668	108499017	1.33	0.00655	108498768	108499217	1.56	0.00419	"nardilysin, N-arginine dibasic convertase, NRD convertase 1"	230598	2600011I06Rik|AI875733|MGC25477|NRD-C
Pik3r3	chr4	+	115719695	115720049	1.33	0.00655	115719595	115719944	1.56	0.00419	"phosphatidylinositol 3 kinase, regulatory subunit, polypeptide 3 (p55)"	18710	AA414954|p55pik
Tesk2	chr4	+	116218447	116218799	2.78	0	116218447	116218799	2.7	0	testis-specific kinase 2	230661	MGC29168
Mutyh	chr4	+	116305334	116305786	1.82	0.000805	116305434	116305983	2.11	0	mutY homolog (E. coli)	70603	5730495A01Rik|Mutyha|Mutyhalpha|Mutyhb|Mutyhbeta|Mutyhc|Myh
Toe1	chr4	-	116305334	116305786	1.82	0.000805	116305434	116305983	2.11	0	"target of EGR1, member 1 (nuclear)"	68276	4930584N22Rik|4933424D16Rik|AI413517
4833401D15Rik	chr4	+	116622806	116623555	2.12	0	116622406	116623255	2.52	0	RIKEN cDNA 4833401D15 gene	242646	-
9530048O09Rik	chr4	-	116622806	116623555	2.12	0	116622406	116623255	2.52	0	RIKEN cDNA 9530048O09 gene	78611	BB115071
Hivep3	chr4	+	119310612	119311162	1.87	0.000532	119310612	119311162	1.42	0.00944	human immunodeficiency virus type I enhancer binding protein 3	16656	2900056N03Rik|A130075N07|AI848000|E030045D18Rik|KBP1|Krc|Rc|Zas3
Ppt1	chr4	+	122355957	122356413	3.28	0	122355957	122356413	3.8	0	palmitoyl-protein thioesterase 1	19063	9530043G02Rik|AA960502|C77813|CLN1|D4Ertd184e|INCL|MGC107420|PPT
Cap1	chr4	-	122374309	122374765	2.12	0	122374309	122374658	1.88	0.00018	"CAP, adenylate cyclase-associated protein 1 (yeast)"	12331	-
Cap1	chr4	-	122388116	122388565	1.78	0.00105	122388616	122388971	1.97	0	"CAP, adenylate cyclase-associated protein 1 (yeast)"	12331	-
Mfsd2	chr4	-	122463712	122464061	1.91	0.000387	122463712	122464061	2.01	0	major facilitator superfamily domain containing 2	76574	1700018O18Rik
Trit1	chr4	+	122516249	122516698	1.91	0.000387	122516249	122516598	1.79	0.000905	tRNA isopentenyltransferase 1	66966	2310075G14Rik|AI314189|AI314635|AV099619|IPT|MOD5
6330407G11Rik	chr4	-	123253053	123253614	1.41	0.00443	123253053	123253815	1.33	0.00526	RIKEN cDNA 6330407G11 gene	68050	-
LOC667061	chr4	+	123253053	123253614	1.41	0.00443	123253053	123253815	1.33	0.00526	hypothetical protein LOC667061	667061	-
Rbbp4	chr4	-	128838082	128838431	2.03	0.000266	128837982	128838431	1.79	0.000905	retinoblastoma binding protein 4	19646	mRbAp48
Zbtb8os	chr4	+	128838082	128838431	2.03	0.000266	128837982	128838431	1.79	0.000905	zinc finger and BTB domain containing 8 opposite strand	67106	2010001H09Rik|2310028N13Rik|AI851226|Arch|Archm
Bsdc1	chr4	+	128963432	128963981	1.99	0.00023	128963132	128963981	1.33	0.00526	BSD domain containing 1	100383	1110063F24Rik|AW011758
BC030183	chr4	-	129082690	129082939	2.24	0	129082690	129082939	2.2	0.00159	cDNA sequence BC030183	230766	MGC29254
Ccdc28b	chr4	-	129126132	129126481	1.37	0.00508	129126032	129126881	1.33	0.00526	coiled coil domain containing 28B	66264	1110002E08Rik|1810010N17Rik
Iqcc	chr4	-	129126132	129126481	1.37	0.00508	129126032	129126881	1.33	0.00526	IQ motif containing C	230767	BC026978|MGC28034
Khdrbs1	chr4	-	129245113	129245462	1.37	0.00508	129245013	129245370	2.06	0	"KH domain containing, RNA binding, signal transduction associated 1"	20218	Sam68|p62
Col16a1	chr4	+	129547866	129548215	1.29	0.00765	129547866	129548415	1.33	0.00526	"procollagen, type XVI, alpha 1"	107581	2700007F12Rik|A530052M23Rik|AI838662|CA1F
Laptm5	chr4	+	130185090	130185439	1.66	0.00101	130185090	130185439	1.92	0.000203	lysosomal-associated protein transmembrane 5	16792	E3
Sesn2	chr4	-	131782582	131783535	1.66	0.00101	131783082	131783431	1.56	0.00419	sestrin 2	230784	HI95|MGC11758|SEST2|Ses2
Nudc	chr4	-	132817388	132817737	1.95	0.00021	132817388	132817737	2.33	0	nuclear distribution gene C homolog (Aspergillus)	18221	SIG-92|Silg92
Cd52	chr4	-	133369253	133369702	1.99	0.00023	133369253	133369804	2.29	0	CD52 antigen	23833	AI463198|B7|B7-Ag|CAMPATH-1|CLS1|MB7
Ubxd5	chr4	+	133369253	133369702	1.99	0.00023	133369253	133369804	2.29	0	UBX domain containing 5	67586	4930506L07Rik|D4Bwg1540e|Soc|Soci
Tmem50a	chr4	-	134189242	134189491	2.7	0	134189142	134189491	2.52	0	transmembrane protein 50A	71817	3200001F09Rik|CAM|Smp1
Syf2	chr4	+	134202545	134202994	2.2	0	134202645	134202994	1.56	0.00419	"SYF2 homolog, RNA splicing factor (S. cerevisiae)"	68592	1110018L13Rik|Cbpin|D4Bwg1551e|Gcipip|mp29|p29
Srrm1	chr4	-	134625662	134626011	2.28	0	134625662	134626011	1.97	0	serine/arginine repetitive matrix 1	51796	AA407769|POP101|Srm160
Pnrc2	chr4	-	135145445	135145894	1.66	0.00101	135145245	135145894	1.42	0.00944	proline-rich nuclear receptor coactivator 2	52830	0610011E17Rik|D4Bwg0593e|MGC11707
Pnrc2	chr4	-	135148345	135148994	1.58	0	135148345	135148894	1.83	0.00066	proline-rich nuclear receptor coactivator 2	52830	0610011E17Rik|D4Bwg0593e|MGC11707
Cnr2	chr4	+	135167309	135167658	1.62	0.00113	135167209	135167558	1.42	0.00944	cannabinoid receptor 2 (macrophage)	12802	CB2|CB2-R
Fuca1	chr4	+	135191082	135191431	2.82	0	135191082	135191431	2.79	0	"fucosidase, alpha-L- 1, tissue"	71665	0610006A03Rik|9530055J05Rik|Afuc|Fuca
Id3	chr4	+	135415559	135415908	1.87	0.000532	135415559	135415908	1.46	0.00724	inhibitor of DNA binding 3	15903	HLH462|Idb3
C1qb	chr4	-	136158139	136158488	1.66	0.00101	136158139	136158488	1.46	0.00724	"complement component 1, q subcomponent, beta polypeptide"	12260	-
Padi2	chr4	+	140177312	140177661	1.62	0.00113	140177412	140177761	2.15	0	"peptidyl arginine deiminase, type II"	18600	Pdi|Pdi2|mKIAA0994
Casp9	chr4	+	141062770	141063119	1.29	0.00765	141062770	141063220	1.42	0.00944	caspase 9	12371	AI115399|AW493809|Caspase-9|ICE-LAP6|Mch6
Dnajc16	chr4	-	141062770	141063119	1.29	0.00765	141062770	141063220	1.42	0.00944	"DnaJ (Hsp40) homolog, subfamily C, member 16"	214063	2900037O03Rik|4732437J24Rik|D030060M24|mKIAA0962
Casp9	chr4	+	141066270	141066520	2.78	0	141066270	141066520	3.07	0	caspase 9	12371	AI115399|AW493809|Caspase-9|ICE-LAP6|Mch6
Dnajc16	chr4	-	141066270	141066520	2.78	0	141066270	141066520	3.07	0	"DnaJ (Hsp40) homolog, subfamily C, member 16"	214063	2900037O03Rik|4732437J24Rik|D030060M24|mKIAA0962
9030409G11Rik	chr4	-	141428793	141429142	1.87	0.000532	141428793	141429142	1.69	0.00149	RIKEN cDNA 9030409G11 gene	71529	2310007B04Rik|AI256607|AI666764|AW061099|Kazrin
A430005L14Rik	chr4	+	152801686	152802035	1.99	0.00023	152801686	152802035	1.65	0.00235	RIKEN cDNA A430005L14 gene	97159	C79672
BC049688	chr4	-	152801686	152802035	1.99	0.00023	152801686	152802035	1.65	0.00235	cDNA sequence BC049688	407834	-
Mterf	chr5	-	3899763	3900213	1.35	0.00655	3899863	3900213	1.87	0.00018	mitochondrial transcription termination factor	545725	4931431L11Rik|9230106K09Rik
MTERF	chr5	-	3899763	3900213	1.35	0.00655	3899863	3900213	1.87	0.00018	mitochondrial transcription termination factor 1	208595	-
Cyp51	chr5	-	4111780	4112131	2.03	0.00023	4111280	4112131	1.32	0.00526	"cytochrome P450, family 51"	13121	AI426508
4930528G09Rik	chr5	-	20938595	20938844	3.05	0	20938595	20938844	2.42	0	RIKEN cDNA 4930528G09 gene	75172	KIAA1505|mKIAA1505
Dnajc2	chr5	-	21298275	21298624	2.12	0	21298275	21298624	1.55	0.00419	"DnaJ (Hsp40) homolog, subfamily C, member 2"	22791	AU020218|MIDA1|Zrf1|Zrf2
Psmc2	chr5	+	21298275	21298624	2.12	0	21298275	21298624	1.55	0.00419	"proteasome (prosome, macropain) 26S subunit, ATPase 2"	19181	-
BC050254	chr5	-	22945114	22945463	1.4	0.00508	22944914	22945463	1.32	0.00526	cDNA sequence BC050254	269630	-
Mll5	chr5	+	22945114	22945463	1.4	0.00508	22944914	22945463	1.32	0.00526	myeloid/lymphoid or mixed-lineage leukemia 5	69188	1810033J14Rik|9530077A04Rik|D230038D11Rik|FLJ10078
Abcb8	chr5	+	23899329	23899678	1.99	0.00021	23899329	23899678	2.01	0	"ATP-binding cassette, sub-family B (MDR/TAP), member 8"	74610	4833412N02Rik|AA409895
Nos3as	chr5	-	23899329	23899678	1.99	0.00021	23899329	23899678	2.01	0	nitric oxide synthase 3 antisense	213948	Apg912|Apg9l2|Apgdc2|Gm574|eONE|sONE
Abcf2	chr5	-	24087674	24088023	1.52	0.00263	24087574	24087923	1.69	0.00149	"ATP-binding cassette, sub-family F (GCN20), member 2"	27407	0710005O05Rik|D13Ertd614e|E430001O06
6330412F12Rik	chr5	+	24195490	24195939	2.07	0.000266	24195490	24195939	2.01	0	RIKEN cDNA 6330412F12 gene	53312	4931404D21Rik|BS4|NY-REN-18|Nub1
6330412F12Rik	chr5	+	24197791	24198140	3.43	0	24197791	24198140	3.11	0	RIKEN cDNA 6330412F12 gene	53312	4931404D21Rik|BS4|NY-REN-18|Nub1
Dnajb6	chr5	+	30065710	30066071	2.33	0	30065710	30066071	2.33	0	"DnaJ (Hsp40) homolog, subfamily B, member 6"	23950	MGC102124|Mrj|mDj4
Cenpa	chr5	+	30943066	30943515	2.12	0	30943066	30943415	1.92	0.000203	centromere autoantigen A	12615	Cenp-A
9430057O19Rik	chr5	+	31163485	31164435	1.35	0.00156	31163785	31164134	1.51	0.00592	RIKEN cDNA 9430057O19 gene	231093	4930455N08
Preb	chr5	-	31237147	31238506	2.29	0	31237547	31238796	2.15	0	prolactin regulatory element binding	50907	C85705
Cad	chr5	+	31330551	31331600	1.69	0.00101	31330551	31330900	2.01	0	"carbamoyl-phosphate synthetase 2, aspartate transcarbamylase, and dihydroorotase"	69719	2410008J01Rik|AU018859|Cpad
Zfp513	chr5	-	31477817	31479066	1.02	0.00509	31477717	31479066	1.6	0.00206	zinc finger protein 513	101023	AW990386|D430028M17Rik
Zfp512	chr5	+	31728020	31729169	2.45	0	31728920	31729169	2.51	0	zinc finger protein 512	269639	2500002M11Rik|AI450173|D230008H22
2410018C17Rik	chr5	-	33946531	33946881	1.95	0.000387	33946531	33946881	1.6	0.00307	RIKEN cDNA 2410018C17 gene	74504	5430419M09Rik|Dntnp|KIAA4017
LOC433873	chr5	+	33946531	33946881	1.95	0.000387	33946531	33946881	1.6	0.00307	hypothetical gene supported by AK040173	433873	-
Tacc3	chr5	+	33975238	33975687	1.48	0.00366	33975238	33975687	1.51	0.00592	"transforming, acidic coiled-coil containing protein 3"	21335	Aint|C86661
Tmem129	chr5	-	33975238	33975687	1.48	0.00366	33975238	33975687	1.51	0.00592	transmembrane protein 129	68366	0610039G24Rik|2410015J15Rik|AA409575
A830049F12Rik	chr5	+	34652977	34654026	1.74	0.000875	34652977	34653326	1.74	0.00137	RIKEN cDNA A830049F12 gene	319915	Rnf4
LOC665559	chr5	-	34652977	34654026	1.74	0.000875	34652977	34653326	1.74	0.00137	hypothetical protein LOC665559	665559	-
Rnf4	chr5	+	34652977	34654026	1.74	0.000875	34652977	34653326	1.74	0.00137	ring finger protein 4	19822	AU018689
2610033H07Rik	chr5	-	34976755	34977204	1.35	0.00655	34976855	34977204	1.69	0.00149	RIKEN cDNA 2610033H07 gene	75416	-
Gprk2l	chr5	+	34976755	34977204	1.35	0.00655	34976855	34977204	1.69	0.00149	"G protein-coupled receptor kinase 2, groucho gene related (Drosophila)"	14772	A830025H08Rik|GRK|Gprk4|Grk4
2310079F23Rik	chr5	-	35892062	35892412	2.07	0.000266	35892062	35892412	1.83	0.00066	RIKEN cDNA 2310079F23 gene	78890	-
Acox3	chr5	+	35900350	35900608	2.75	0	35900350	35900608	2.97	0	"acyl-Coenzyme A oxidase 3, pristanoyl"	80911	BI685180|EST-s59|PCOX
Sh3tc1	chr5	-	36045619	36045968	2.29	0	36045819	36046268	2.01	0	SH3 domain and tetratricopeptide repeats 1	231147	4631428G15|BC024909|MGC67153
Man2b2	chr5	-	37118999	37119348	1.61	0.00152	37118999	37119348	2.38	0	"mannosidase 2, alpha B2"	17160	mKIAA0935
Bst1	chr5	+	44107138	44107588	1.35	0.00655	44107138	44107687	1.28	0.00758	bone marrow stromal cell antigen 1	12182	114/A10|A530073F09|BP-3|Bp3|Bsta1|CD157|Ly65
LOC624224	chr5	+	45737855	45739011	1.69	0	45737955	45738704	1.83	0.00066	similar to Usher syndrome type III A	624224	-
Qdpr	chr5	-	45737855	45739011	1.69	0	45737955	45738704	1.83	0.00066	quininoid dihydropteridine reductase	110391	2610008L04Rik|D5Ertd371e|Dhpr|PKU2
Anapc4	chr5	+	53122132	53122481	1.31	0.00765	53122032	53122481	2.42	0	anaphase promoting complex subunit 4	52206	2610306D21Rik|APC4|D5Ertd249e
AA536743	chr5	-	64247951	64248504	1.31	0.00263	64247951	64248600	1.28	0.00114	expressed sequence AA536743	100532	-
Tbc1d1	chr5	+	64435335	64435787	2.33	0	64435335	64435586	2.42	0	"TBC1 domain family, member 1"	57915	1110062G02Rik|AI385682|AW555803|MGC106104|Tbc1|mKIAA1108
Tlr6	chr5	-	65239936	65240285	2.33	0	65239936	65240285	2.79	0	toll-like receptor 6	21899	-
Rhoh	chr5	+	66139732	66140681	1.44	0.00585	66139732	66140581	1.87	0	"ras homolog gene family, member H"	74734	5830400A04Rik|AU019774|Arhh
Rhoh	chr5	+	66142532	66142981	1.31	0.00263	66142432	66142781	2.1	0	"ras homolog gene family, member H"	74734	5830400A04Rik|AU019774|Arhh
Tmem33	chr5	+	67539636	67540085	1.74	0.000875	67539536	67539885	1.78	0.000905	transmembrane protein 33	67878	1110006G02Rik|1600019D15Rik|2410089A21Rik|2700052H22Rik|5430406L04Rik|AA388285|AI314185|AI426615|db83
Lnx1	chr5	-	74986133	74986490	1.48	0.00366	74986133	74986786	1.42	0.00944	ligand of numb-protein X 1	16924	Lnx
1700023E05Rik	chr5	+	78087947	78088302	2.45	0	78088047	78088404	1.74	0.00137	RIKEN cDNA 1700023E05 gene	71868	-
Cxcl4	chr5	+	91846567	91846924	2.07	0.000266	91846567	91846924	1.92	0.000203	chemokine (C-X-C motif) ligand 4	56744	Pf4|Scyb4
Btc	chr5	-	92477763	92478212	1.9	0.000532	92477863	92478212	1.96	0	"betacellulin, epidermal growth factor family member"	12223	-
Rchy1	chr5	-	93036666	93038115	1.99	0.00021	93037366	93038015	1.87	0.00018	ring finger and CHY zinc finger domain containing 1	68098	6720407C15Rik|ARNIP|AU042618|CHIMP|PRO1996|Pirh2|Zfp363|mARNIP
Thap6	chr5	+	93036666	93038115	1.99	0.00021	93037366	93038015	1.87	0.00018	THAP domain containing 6	381650	4930534K21Rik|AI448650
Cxcl10	chr5	-	93423904	93424354	1.48	0.00366	93423904	93424354	1.55	0.00419	chemokine (C-X-C motif) ligand 10	15945	C7|CRG-2|INP10|IP-10|IP10|Ifi10|Scyb10|gIP-10|mob-1
Nup54	chr5	-	93510434	93510789	2.79	0	93510334	93510683	2.33	0	nucleoporin 54	269113	3110079L04Rik|54kDa
Ccni	chr5	-	94282865	94283214	1.44	0.00443	94282865	94283214	1.96	0	cyclin I	12453	-
Ccng2	chr5	+	94340730	94341079	2.37	0	94340730	94341279	2.33	0	cyclin G2	12452	MGC113793
Cnot6l	chr5	-	96404309	96404763	1.4	0.00508	96404309	96404763	1.87	0.00018	"CCR4-NOT transcription complex, subunit 6-like"	231464	4932442K20Rik|DKFZp434K098|MGC29037
Antxr2	chr5	-	98273331	98273682	2.54	0	98273331	98273682	2.6	0	anthrax toxin receptor 2	71914	2310046B19Rik|AW561899|CMG-2|CMG2|cI-35
Hel308	chr5	-	101038998	101039349	1.78	0.000935	101038898	101039247	1.51	0.00592	"helicase, mus308-like (Drosophila)"	191578	D430018E21Rik|MGC105224
Mrps18c	chr5	+	101038998	101039349	1.78	0.000935	101038898	101039247	1.51	0.00592	mitochondrial ribosomal protein S18C	68735	1110037D14Rik
Klhl8	chr5	-	104153483	104153832	2.16	0	104153483	104153832	2.01	0	kelch-like 8 (Drosophila)	246293	2310001P09Rik|D5Ertd431e|MGC102224
5830443L24Rik	chr5	-	105293799	105294352	1.57	0.00206	105293799	105294352	1.51	0.00592	RIKEN cDNA 5830443L24 gene	76074	mGBP8
Mpa2	chr5	-	105379796	105380245	1.44	0.00443	105379796	105380245	1.46	0.00724	macrophage activation 2	17472	AW228052|Gbp4|KIAA4245|Mag-2|Mpa-2|mKIAA4245
Zfp326	chr5	+	106116237	106116586	1.31	0.00765	106116237	106116586	1.78	0.000905	zinc finger protein 326	54367	5730470H14Rik|ZAN75
Rpl5	chr5	+	108141298	108141547	2.58	0	108141298	108141547	2.15	0.00139	ribosomal protein L5	19983	MGC101934|MGC117998|U21RNA
Ccdc18	chr5	+	108372325	108372674	1.9	0.000532	108371925	108373074	1.37	0	coiled-coil domain containing 18	73254	1700021E15Rik|4932411G06Rik|MGC100177|NY-SAR-41
Tmed5	chr5	-	108372325	108372674	1.9	0.000532	108371925	108373074	1.37	0	transmembrane emp24 protein transport domain containing 5	73130	3110020O18Rik|4432412D15Rik
Tpte2	chr5	-	109797127	109798583	2.67	0	109797127	109797678	3.06	0	transmembrane phosphoinositide 3-phosphatase and tensin homolog 2	57914	CRLM2|Ly114|Tslpr
D5Ertd585e	chr5	-	110472680	110473529	2.92	0	110472680	110473032	2.47	0	"DNA segment, Chr 5, ERATO Doi 585, expressed"	71782	1110001J12Rik|AI661024
AW049829	chr5	-	111080095	111080444	2.33	0	111080095	111080444	2.42	0	expressed sequence AW049829	100900	AI325508|Hsc20|MGC41340
Chek2	chr5	+	111080095	111080444	2.33	0	111080095	111080444	2.42	0	CHK2 checkpoint homolog (S. pombe)	50883	CHK2|Cds1|HUCDS1|Rad53
Ankrd13a	chr5	+	115032725	115033178	2.29	0	115032825	115033276	1.92	0.000203	ankyrin repeat domain 13a	68420	1100001D10Rik|ANKRD13|AU046136|MGC118502
4930519G04Rik	chr5	+	115125863	115126215	1.48	0.00366	115125763	115126712	1.64	0.00235	RIKEN cDNA 4930519G04 gene	67593	1700014B12Rik
Oasl1	chr5	+	115182988	115183237	2.41	0	115182988	115183237	2.33	0	2'-5' oligoadenylate synthetase-like 1	231655	7530414C13Rik|oasl9
2410131K14Rik	chr5	+	118506406	118506855	1.65	0.00113	118506606	118507055	1.6	0.00307	RIKEN cDNA 2410131K14 gene	76792	MGC129458|MGC129459
Tmem118	chr5	-	118506406	118506855	1.65	0.00113	118506606	118507055	1.6	0.00307	transmembrane protein 118	269695	AW049082|B830028P19Rik
Dtx1	chr5	-	120974771	120975223	1.48	0.00366	120974971	120975320	1.55	0.00419	deltex 1 homolog (Drosophila)	14357	Fxit1|KIAA4160|mKIAA4160
LOC665318	chr5	-	121464947	121465196	1.95	0	121464947	121465196	2.38	0	hypothetical protein LOC665318	665318	-
Rpl6	chr5	+	121464947	121465196	1.95	0	121464947	121465196	2.38	0	ribosomal protein L6	19988	MGC117949|Taxreb107
Tmem116	chr5	+	121710659	121710908	3.43	0	121710659	121710908	3.29	0	transmembrane protein 116	77462	4930406A18Rik|4930513P12Rik|C030022K24Rik
Erp29	chr5	-	121711781	121712233	2.33	0	121711781	121712233	2.1	0	endoplasmic reticulum protein 29	67397	1200015M03Rik|2810446M09Rik|AW209030|Erp28|Erp31|PDI-Db
Tmem116	chr5	+	121711781	121712233	2.33	0	121711781	121712233	2.1	0	transmembrane protein 116	77462	4930406A18Rik|4930513P12Rik|C030022K24Rik
P2rx4	chr5	+	122968658	122968907	1.57	0.00516	122968658	122968907	1.74	0.00498	"purinergic receptor P2X, ligand-gated ion channel 4"	18438	AI504491|AW555605|D5Ertd444e|P2X4
Fbxl10	chr5	-	123250565	123252118	1.1	0	123250565	123251419	1.74	0	F-box and leucine-rich repeat protein 10	30841	Cxxc2|E430001G17|Fbl10|KIAA3014|PCCX2|mKIAA3014
LOC665515	chr5	+	123401726	123402294	1.23	0.0053	123401726	123402075	1.64	0.00235	similar to CG40351-PA.3	665515	-
Setd1b	chr5	+	123411703	123412052	1.31	0.00765	123411403	123411952	1.92	0	SET domain containing 1B	208043	AA516740|BC035291|MGC39035|mKIAA1076
Hip1r	chr5	+	124233706	124234055	1.78	0.000935	124233706	124234055	2.33	0	huntingtin interacting protein 1 related	29816	AA410023|mKIAA0655
Vps37b	chr5	-	124295144	124295500	1.86	0.000805	124295144	124295500	1.42	0.00944	vacuolar protein sorting 37B (yeast)	330192	2300007F24Rik|AI415429|BC026744|FLJ12750|MGC25614
Ddx55	chr5	+	124813187	124813536	1.4	0.00508	124813187	124813536	1.46	0.00724	DEAD (Asp-Glu-Ala-Asp) box polypeptide 55	67848	2810021H22Rik|mKIAA1595
LOC639281	chr5	+	125679001	125679450	1.86	0.000805	125679001	125679450	1.83	0.00066	hypothetical protein LOC639281	639281	-
Ubc	chr5	-	125679001	125679450	1.86	0.000805	125679001	125679450	1.83	0.00066	ubiquitin C	22190	2700054O04Rik|AI194771|TI-225
2410018M08Rik	chr5	+	130180199	130180548	1.31	0.00765	130180199	130180548	1.42	0.00944	RIKEN cDNA 2410018M08 gene	71970	-
Vkorc1l1	chr5	+	130226091	130226640	1.4	0.00508	130226091	130226540	2.19	0	"vitamin K epoxide reductase complex, subunit 1-like 1"	69568	2310024K08Rik
Gusb	chr5	-	130287581	130287939	2.33	0	130287281	130287939	1.83	0	"glucuronidase, beta"	110006	AI747421|Gur|Gus|Gus-r|Gus-s|Gus-t|Gus-u|Gut|asd|g
Rsafd1	chr5	+	130537964	130538320	1.78	0.000935	130537964	130538320	2.1	0	radical S-adenosyl methionine and flavodoxin domains 1	100929	AW125391
Rsafd1	chr5	+	130541494	130541869	1.57	0.00516	130541494	130541869	2.28	0	radical S-adenosyl methionine and flavodoxin domains 1	100929	AW125391
Sbds	chr5	-	130541494	130541869	1.57	0.00516	130541494	130541869	2.28	0	Shwachman-Bodian-Diamond syndrome homolog (human)	66711	4733401P19Rik|AI836084|CGI-97|SDS
Gats	chr5	+	134383224	134383673	2.75	0	134383224	134383673	2.42	0	opposite strand transcription unit to Stag3	80909	7530428J21Rik|AW742413
Ncf1	chr5	-	134516964	134517413	1.69	0.00101	134516964	134517413	1.51	0.00592	neutrophil cytosolic factor 1	17969	NOXO2|Ncf-1|p47<phox>|p47phox
Lat2	chr5	-	134899031	134899680	1.4	0.00508	134899431	134899680	1.69	0.00578	"linker for activation of T cells family, member 2"	56743	AW125574|LAB|NTAL|WSCR5|Wbscr15|Wbscr5
Wbscr27	chr5	+	135216849	135217098	1.99	0	135216849	135217098	2.01	0.00343	Williams Beuren syndrome chromosome region 27 (human)	79565	AW492986|BC002286|MGC8159
Ywhag	chr5	-	136218425	136218674	2.62	0	136218425	136218774	2.1	0	"3-monooxygenase/tryptophan 5-monooxygenase activation protein, gamma polypeptide"	22628	D7Bwg1348e
A730041O15Rik	chr5	-	136455780	136456629	1.35	0	136456180	136456529	1.42	0.00944	RIKEN cDNA A730041O15 gene	269717	-
Prkrip1	chr5	-	136483688	136483937	2.37	0	136483688	136483937	2.15	0.00139	Prkr interacting protein 1 (IL11 inducible)	66801	8430424D23Rik|C114
Trim56	chr5	-	137400674	137401623	1.57	0.00206	137400574	137400923	1.51	0.00592	tripartite motif-containing 56	384309	A130009K11Rik|Gm452|MGC37358|RNF109
Pop7	chr5	-	137731781	137732130	2.75	0	137731781	137732130	2.74	0	"processing of precursor 7, ribonuclease P family, (S. cerevisiae)"	74097	0610037N12Rik|AI852017|Rpp20
Gnb2	chr5	-	137760697	137761047	1.4	0.00508	137760697	137761047	2.06	0	"guanine nucleotide binding protein, beta 2"	14693	Gnb-2
Gnb2	chr5	-	137762799	137763548	1.44	0.00142	137762598	137763748	1.69	0.00149	"guanine nucleotide binding protein, beta 2"	14693	Gnb-2
Mospd3	chr5	-	137830793	137831242	1.44	0.00443	137830793	137831242	1.74	0.00137	motile sperm domain containing 3	68929	1190005J19Rik|5133401H10Rik
Fbxo24	chr5	-	137858860	137859309	1.52	0.00263	137858760	137859109	1.69	0.00149	F-box only protein 24	71176	4933422D21Rik|Fbx24
Lrch4	chr5	+	137858860	137859309	1.52	0.00263	137858760	137859109	1.69	0.00149	leucine-rich repeats and calponin homology (CH) domain containing 4	231798	2810008P14Rik|2900069C24Rik|AI558103|LRN|LRRN4|MGC19364|SAP25|mFLJ00248
Ap4m1	chr5	+	138400663	138401212	1.65	0	138400663	138401112	1.83	0.00066	"adaptor-related protein complex AP-4, mu 1"	11781	4930443L05Rik|Ap4m4
Mcm7	chr5	-	138400663	138401212	1.65	0	138400663	138401112	1.83	0.00066	minichromosome maintenance deficient 7 (S. cerevisiae)	17220	Mcmd7|mCDC47
2610020C11Rik	chr5	+	138671741	138671990	2.2	0	138671741	138671990	2.42	0	RIKEN cDNA 2610020C11 gene	72154	A630094N24Rik|AI327407|mszf12|mszf23-1
Chst12	chr5	+	140754851	140755100	1.65	0.00444	140754851	140755100	1.83	0.00351	carbohydrate sulfotransferase 12	59031	AI595374|C4S-2|C4ST-2|C4ST2
AA881470	chr5	+	140957277	140957626	1.44	0.00443	140957077	140957626	1.64	0.00112	EST AA881470	231841	-
Iqce	chr5	-	140957277	140957626	1.44	0.00443	140957077	140957626	1.64	0.00112	IQ motif containing E	74239	1700028P05Rik|mKIAA1023
Actb	chr5	-	143174336	143174685	2.96	0	143174336	143174685	3.38	0	"actin, beta, cytoplasmic"	11461	Actx|E430023M04Rik|beta-actin
Rnf6	chr5	-	146524921	146525370	1.44	0.00443	146524921	146525170	2.1	0.00263	ring finger protein (C3H2C3 type) 6	74132	1200013I08Rik|5730419H05Rik|AA537053
Uspl1	chr5	+	149495004	149495453	1.35	0.00655	149495004	149495353	1.51	0.00592	ubiquitin specific peptidase like 1	231915	D030048C09|E430026A01Rik
4930434E21Rik	chr5	+	149794907	149795256	1.4	0.00508	149794907	149795256	1.42	0.00944	RIKEN cDNA 4930434E21 gene	381693	-
B230342M21Rik	chr5	-	150863731	150864183	2.62	0	150863931	150864282	2.01	0	RIKEN cDNA B230342M21 gene	100637	AI428195
Shfm1	chr6	-	6530442	6530794	2.39	0	6530442	6530794	2.03	0	split hand/foot malformation (ectrodactyly) type 1	20422	DSS1|Shfdg1|Shfg
8430437G11Rik	chr6	-	13559232	13560189	1.58	0.00113	13559132	13559882	1.63	0.00235	RIKEN cDNA 8430437G11 gene	101118	5730526F17Rik|AI462344|AI504145
8430437G11Rik	chr6	-	13560933	13561182	2.19	0	13560933	13561182	1.67	0.00578	RIKEN cDNA 8430437G11 gene	101118	5730526F17Rik|AI462344|AI504145
St7	chr6	+	17699569	17699918	2.48	0	17699569	17699918	2.58	0	Suppression of tumorigenicity 7	64213	9430001H04Rik|Fam4a2|HELG|MGC118540|RAY1|SEN4|TSG7
Rnf133	chr6	-	23599957	23601006	1.3	0.00655	23600057	23600511	1.49	0.00592	ring finger protein 133	386611	Greul2
Irf5	chr6	+	29473492	29473741	1.87	0	29473492	29473741	1.58	0.00987	interferon regulatory factor 5	27056	AW491843|mirf5
Irf5	chr6	+	29474192	29474541	2.8	0	29474192	29474541	2.71	0	interferon regulatory factor 5	27056	AW491843|mirf5
Tnpo3	chr6	-	29559867	29560116	1.74	0	29559667	29560116	2.26	0	transportin 3	320938	5730544L10Rik|C430013M08Rik|C81142|D6Ertd313e|KIAA4133|MGC90049|Trn-SR|mKIAA4133
Zc3hav1	chr6	-	38284031	38284480	2.35	0	38284031	38284380	2.26	0	"zinc finger CCCH type, antiviral 1"	78781	1200014N16Rik|2900058M19Rik|9130009D18Rik|D6Bwg1452e|ZAP
1110001J03Rik	chr6	+	38462902	38463551	1.7	0.000935	38462702	38463451	1.4	0.00376	RIKEN cDNA 1110001J03 gene	66117	-
Rab19	chr6	+	39311129	39311479	1.62	0.00101	39310829	39311381	1.58	0	"RAB19, member RAS oncogene family"	19331	-
Slc37a3	chr6	-	39311129	39311479	1.62	0.00101	39310829	39311381	1.58	0	"solute carrier family 37 (glycerol-3-phosphate transporter), member 3"	72144	2610507O21Rik|AU044904|MGC106297
Braf	chr6	-	39655720	39656570	1.74	0	39655720	39656278	1.72	0.00137	Braf transforming gene	109880	9930012E13Rik|AA120551|AA387315|AA473386|B-raf|Braf-2|Braf2|C230098H17|C87398|D6Ertd631e
Gimap9	chr6	+	48605745	48606094	2.48	0	48605745	48606094	2.31	0	"GTPase, IMAP family member 9"	317758	A630002K24|BB145400
Gimap6	chr6	-	48637632	48637981	1.46	0.00263	48637732	48638086	1.63	0.00235	"GTPase, IMAP family member 6"	231931	4833419H03Rik|FLJ00102|Ian6|MGC41522|mFLJ00102
Gimap5	chr6	+	48675032	48675881	1.7	0.000935	48675432	48675881	2.26	0	"GTPase, IMAP family member 5"	317757	D630024P16|E230026N22Rik
Osbpl3	chr6	-	50387618	50387979	1.74	0.00105	50387618	50387979	2.13	0	oxysterol binding protein-like 3	71720	1200014M06Rik|6720421I08Rik|A530055M08|MGC102333|ORP3|OSBP3
BC022713	chr6	+	51259639	51259988	2.39	0	51259639	51259988	2.53	0	cDNA sequence BC022713	269739	D830038L22|MGC31500
Hoxa1	chr6	-	52087750	52088099	1.3	0.00655	52087750	52088099	1.49	0.00592	homeo box A1	15394	ERA1|Hox-1.6
Ppm1k	chr6	-	57464954	57465503	1.3	0.00156	57465054	57465503	1.76	0.000905	protein phosphatase 1K (PP2C domain containing)	243382	2900063A19Rik|A930026L03Rik|MGC115965
Ptgds2	chr6	-	65074158	65075015	2.8	0	65074158	65074511	2.08	0	"prostaglandin D2 synthase 2, hematopoietic"	54486	H-PGDS
Igkv14-126	chr6	+	67826179	67826430	1.91	0	67826179	67826430	2.13	0.00139	immunoglobulin kappa chain variable 14-126	628127	br9
4933424C13Rik	chr6	-	72451886	72452235	2.31	0	72451886	72452435	2.08	0	RIKEN cDNA 4933424C13 gene	71130	MGC118386
Capg	chr6	+	72474095	72474444	1.58	0.00113	72474095	72474444	1.49	0.00592	"capping protein (actin filament), gelsolin-like"	12332	gCap39|mbh1
Mthfd2	chr6	-	83282599	83282848	1.79	0	83282599	83282948	1.54	0.00419	"methylenetetrahydrofolate dehydrogenase (NAD+ dependent), methenyltetrahydrofolate cyclohydrolase"	17768	AW558851|NMDMC
Mobk1b	chr6	+	83290982	83291831	2.11	0	83290982	83291831	2.35	0	"MOB1, Mps One Binder kinase activator-like 1B (yeast)"	232157	4022402H07Rik|MGC6884|MOB1|MOB4B
Dguok	chr6	-	83472351	83472700	1.74	0.00105	83472351	83472800	1.4	0.00376	deoxyguanosine kinase	27369	dGK
Dusp11	chr6	-	85926606	85927055	1.62	0.00101	85926806	85927155	1.63	0.00235	dual specificity phosphatase 11 (RNA/RNP complex 1-interacting)	72102	2010300F21Rik|AI481497
Arhgap25	chr6	-	87497881	87499040	2.19	0	87497881	87499040	2.58	0	Rho GTPase activating protein 25	232201	A130039I20Rik
2010301N04Rik	chr6	-	87637721	87638070	2.84	0	87637721	87638070	2.53	0	RIKEN cDNA 2010301N04 gene	72103	AI452191
E230015B07Rik	chr6	+	87637721	87638070	2.84	0	87637721	87638070	2.53	0	RIKEN cDNA E230015B07 gene	320001	-
1810048P08Rik	chr6	-	87774845	87775299	2.07	0	87774845	87775194	1.72	0.00137	RIKEN cDNA 1810048P08 gene	69834	2500004H21Rik|AW490415|MGC6993|Rab
C130022K22Rik	chr6	+	91843224	91843673	1.3	0.00655	91843424	91843773	1.76	0.000905	RIKEN cDNA C130022K22 gene	232236	-
Arl6ip5	chr6	+	97176028	97176577	1.22	0.00405	97176028	97176977	1.22	0	ADP-ribosylation factor-like 6 interacting protein 5	65106	5930404D22Rik|AV001879|Aip-5|Gtrap3-18
Il5ra	chr6	-	106716164	106716521	2.52	0	106716164	106716521	2.67	0	"interleukin 5 receptor, alpha"	16192	CD125|CDw125|Il5r
Trnt1	chr6	+	106734602	106735051	1.42	0.00366	106734702	106735051	1.54	0.00419	"tRNA nucleotidyl transferase, CCA-adding, 1"	70047	2410043H24Rik|2610044E04Rik|9830143O18Rik|AA408384|C76540|CGI-47|mt-Trat
Setmar	chr6	+	108030771	108031520	1.3	0	108030771	108031220	1.49	0.00592	SET domain and mariner transposase fusion gene	74729	5830404F24Rik|Etet2
Bhlhb2	chr6	+	108623756	108624305	2.07	0	108624156	108624505	1.85	0.00018	"basic helix-loop-helix domain containing, class B2"	20893	C130042M06Rik|CR8|Clast5|Dec1|Sharp2|Stra13|Stra14
Thumpd3	chr6	+	113011647	113012296	1.3	0.00655	113011747	113012296	1.54	0.00419	THUMP domain containing 3	14911	AW556087|Gt(ROSA)26asSor|Gtrosa26as
Thumpd3	chr6	+	113013147	113013504	1.42	0.00366	113013247	113013596	2.85	0	THUMP domain containing 3	14911	AW556087|Gt(ROSA)26asSor|Gtrosa26as
1110061O04Rik	chr6	+	113203277	113203726	1.54	0.00152	113203077	113203426	1.94	0	RIKEN cDNA 1110061O04 gene	97287	AW553738|C76151
Brpf1	chr6	+	113272118	113272567	1.74	0.00105	113271818	113272767	1.27	0.00114	"bromodomain and PHD finger containing, 1"	78783	4833438B11Rik|4930540D11Rik|Brpf2
Ogg1	chr6	+	113292538	113292987	1.3	0.00655	113292438	113292987	1.27	0.00758	8-oxoguanine DNA-glycosylase 1	18294	Mmh
Arpc4	chr6	+	113343639	113344088	1.46	0.00263	113343639	113344088	1.63	0.00235	"actin related protein 2/3 complex, subunit 4"	68089	20kDa|5330419I20Rik|AI327076|p20-Arc
Tada3l	chr6	-	113343639	113344088	1.46	0.00263	113343639	113344088	1.63	0.00235	"transcriptional adaptor 3 (NGG1 homolog, yeast)-like"	101206	1110004B19Rik|ADA3|AI987856
Arpc4	chr6	+	113344939	113345288	1.91	0.00021	113344939	113345288	2.31	0	"actin related protein 2/3 complex, subunit 4"	68089	20kDa|5330419I20Rik|AI327076|p20-Arc
Tada3l	chr6	-	113344939	113345288	1.91	0.00021	113344939	113345288	2.31	0	"transcriptional adaptor 3 (NGG1 homolog, yeast)-like"	101206	1110004B19Rik|ADA3|AI987856
Vgll4	chr6	-	114840876	114841525	1.58	0.00113	114840776	114841125	2.03	0	vestigial like 4 (Drosophila)	232334	BC048841|MGC54805|VGL-4
D830050J10Rik	chr6	+	115642363	115642712	2.27	0	115642363	115642712	2.4	0	RIKEN cDNA D830050J10 gene	352968	-
Raf1	chr6	-	115642363	115642712	2.27	0	115642363	115642712	2.4	0	v-raf-leukemia viral oncogene 1	110157	6430402F14Rik|AA990557|BB129353|Craf1|D830050J10Rik|MGC102375|Raf-1|c-Raf|v-Raf
Ift122	chr6	+	115818896	115819647	1.46	0	115819196	115819555	2.26	0	intraflagellar transport 122 homolog (Chlamydomonas)	81896	C86139|Wdr10
Mbd4	chr6	-	115818896	115819647	1.46	0	115819196	115819555	2.26	0	methyl-CpG binding domain protein 4	17193	Med1
Zfp422	chr6	-	116596595	116596944	1.79	0.000805	116596595	116597044	2.03	0	zinc finger protein 422	67255	2900028O21Rik|AU041373|KOX15|Krox-25-2|Krox-26|Krox25|Krox26
Hnrpf	chr6	+	117881937	117882786	1.58	0.00113	117882437	117882786	1.9	0.000203	heterogeneous nuclear ribonucleoprotein F	98758	4833420I20Rik|AA407306|MGC101981|MGC36971
Ninj2	chr6	+	120056260	120058013	1.01	0	120056460	120057012	1.49	0.00418	ninjurin 2	29862	-
Jarid1a	chr6	+	120329433	120330082	1.3	0	120329533	120330082	1.67	0	"jumonji, AT rich interactive domain 1A (Rbp2 like)"	214899	AA409370|C76986|MGC11659|RBP2|Rbbp2
M6pr	chr6	+	122274106	122274555	1.58	0.00113	122274106	122274555	1.45	0.00724	"mannose-6-phosphate receptor, cation dependent"	17113	CD-MPR|Mpr46
Necap1	chr6	+	122838425	122838789	2.35	0	122838425	122838789	2.44	0	NECAP endocytosis associated 1	67602	1200016B17Rik|AI747569|FLJ00061|mFLJ00061
Grcc10	chr6	-	124706700	124707056	2.56	0	124706700	124707056	2.62	0	"gene rich cluster, C10 gene"	14790	2310033H05Rik|C10
Ptpn6	chr6	-	124706700	124707056	2.56	0	124706700	124707056	2.62	0	"protein tyrosine phosphatase, non-receptor type 6"	15170	Hcph|Ptp1C|SHP-1|hcp|me|motheaten
Eno2	chr6	-	124735378	124735727	1.87	0	124735378	124735727	1.76	0.00445	"enolase 2, gamma neuronal"	13807	AI837106|D6Ertd375e|Eno-2|NSE
Lrrc23	chr6	-	124748087	124748539	1.38	0.00443	124748087	124748436	1.45	0.00724	leucine rich repeat containing 23	16977	4921537K05Rik|B7|Lrpb7
Zfp384	chr6	+	124974358	124974707	1.99	0.000266	124974258	124974607	1.63	0.00235	zinc finger protein 384	269800	BB163993|C130073D16Rik
Ing4	chr6	+	125005113	125005562	1.54	0.00152	125004813	125005662	1.49	0.00592	"inhibitor of growth family, member 4"	28019	D6Wsu147e|D6Xrf92|p29ING4
Nol1	chr6	+	125097137	125097586	1.3	0.00156	125097237	125097786	1.45	0.0036	nucleolar protein 1	110109	120kDa|A530002O17
Vamp1	chr6	+	125181049	125181398	1.99	0.000266	125181049	125181398	2.76	0	vesicle-associated membrane protein 1	22317	Syb-1|Syb1|VAMP-1
Tapbpl	chr6	-	125196929	125197378	1.38	0.00443	125196929	125197378	1.45	0.00724	TAP binding protein-like	213233	BC017613|MGC27679|TAPBPL-R
D6Wsu163e	chr6	+	126906134	126906483	2.07	0	126906134	126906587	2.26	0	"DNA segment, Chr 6, Wayne State University 163, expressed"	28040	C12orf4
Rad51ap1	chr6	-	126906134	126906483	2.07	0	126906134	126906587	2.26	0	RAD51 associated protein 1	19362	2510006L10Rik|RAB22
Parp11	chr6	+	127419043	127419392	1.7	0.000935	127419043	127419792	1.27	0	"poly (ADP-ribose) polymerase family, member 11"	101187	5330431N24Rik|AI851877|HIN1L
Cd69	chr6	-	129241212	129241861	2.43	0	129241112	129241570	2.58	0	CD69 antigen	12515	5830438K24Rik|AI452015|AIM|VEA
4922502D21Rik	chr6	-	129299496	129299847	1.26	0.00765	129299496	129299847	1.58	0.00307	RIKEN cDNA 4922502D21 gene	381816	Gm1074|MGC107125
Clec12a	chr6	+	129315311	129315965	1.99	0	129315211	129315771	2.4	0	"C-type lectin domain family 12, member a"	232413	CLL-1|D230024O04|Micl
Etv6	chr6	+	134000949	134001398	1.7	0.000935	134001049	134001398	1.99	0	ets variant gene 6 (TEL oncogene)	14011	AW123102|AW557856|Tel
Bcl2l14	chr6	+	134379930	134380279	1.79	0.000805	134379830	134380179	1.76	0.000905	Bcl2-like 14 (apoptosis facilitator)	66813	4930452K23Rik|4933405K19Rik|9030625M01Rik|AI429211|Bclg
BC049715	chr6	+	136792294	136792643	2.52	0	136792294	136792643	2.17	0	cDNA sequence BC049715	320135	-
Wbp11	chr6	-	136792294	136792643	2.52	0	136792294	136792643	2.17	0	WW domain binding protein 11	60321	2510026P17Rik|D6Wsu113e|Npwbp|SIPP1
Aebp2	chr6	+	140583018	140583467	1.58	0.00113	140582318	140583567	2.22	0	AE binding protein 2	11569	B230313N05Rik
Lrmp	chr6	+	145078050	145079099	2.27	0	145078050	145078999	2.22	0	lymphoid-restricted membrane protein	16970	AI553456|D6Int3|D6Int4|D6Int5|D6Int7|D6Int8|Jaw1
Itpr2	chr6	-	146458532	146458881	1.74	0.00105	146458632	146458981	2.08	0	"inositol 1,4,5-triphosphate receptor 2"	16439	AI649341|InsP3R-2|InsP3R-5|Ip3r2|Itpr5
Ergic2	chr6	-	148169307	148169656	1.95	0.00023	148169207	148169556	1.54	0.00419	ERGIC and golgi 2	67456	1200009B18Rik|4930572C01Rik|AA408438|Ptx1
Leng4	chr7	-	3296545	3296994	1.32	0.00655	3296445	3296894	1.33	0.00526	leukocyte receptor cluster (LRC) member 4	77582	5730589L02Rik|BB1|mBB1
Tsen34	chr7	+	3296545	3296994	1.32	0.00655	3296445	3296894	1.33	0.00526	"tRNA splicing endonuclease 34 homolog (SEN34, S. cerevisiae)"	66078	0610027F08Rik|Leng5
Lilrb3	chr7	-	3323391	3323849	1.74	0.000935	3323391	3323849	2.25	0	"leukocyte immunoglobulin-like receptor, subfamily B (with TM and ITIM domains), member 3"	18733	16M4|16M5|16M6|6M1|7M5|Gp91|PIRB1|PIRB2|PIRB3|PIRB4|PIRB5|Pirb
Pira1	chr7	-	3343007	3343363	1.95	0.00021	3343007	3343363	1.83	0.00066	paired-Ig-like receptor A1	18722	6M21|Ly89|PIR-A1|Pir
Lilrb3	chr7	-	3447970	3448426	1.99	0.00023	3448170	3448525	1.92	0.000203	"leukocyte immunoglobulin-like receptor, subfamily B (with TM and ITIM domains), member 3"	18733	16M4|16M5|16M6|6M1|7M5|Gp91|PIRB1|PIRB2|PIRB3|PIRB4|PIRB5|Pirb
Pira2	chr7	-	3447970	3448426	1.99	0.00023	3448170	3448525	1.92	0.000203	paired-Ig-like receptor A2	18725	6M23
Pira11	chr7	-	3501229	3501584	2.48	0	3501229	3501584	2.2	0	paired-Ig-like receptor A11	18724	MGC123394|MGC123395|p91C
Pira4	chr7	-	3501229	3501584	2.48	0	3501229	3501584	2.2	0	paired-Ig-like receptor A4	18727	6M7
Pira6	chr7	-	3501229	3501584	2.48	0	3501229	3501584	2.2	0	paired-Ig-like receptor A6	18729	12M1|Pira10|p91B
Pira3	chr7	-	3518512	3518861	1.53	0.00206	3518512	3518861	1.7	0.00149	paired-Ig-like receptor A3	18726	7M1
Pira6	chr7	-	3518512	3518861	1.53	0.00206	3518512	3518861	1.7	0.00149	paired-Ig-like receptor A6	18729	12M1|Pira10|p91B
LOC664887	chr7	+	3876969	3877318	2.07	0	3876969	3877318	2.38	0	similar to paired-Ig-like receptor A6 isoform a	664887	-
Pira6	chr7	+	3876969	3877318	2.07	0	3876969	3877318	2.38	0	paired-Ig-like receptor A6	18729	12M1|Pira10|p91B
Suv420h2	chr7	+	4342724	4343173	1.32	0.00655	4342824	4343273	1.79	0.000905	suppressor of variegation 4-20 homolog 2 (Drosophila)	232811	BC024816|MGC36471|Suv4-20h2
LOC664968	chr7	-	4395797	4396146	1.53	0.00206	4395797	4396146	1.88	0.00018	hypothetical protein LOC664968	664968	-
Rpl28	chr7	+	4395797	4396146	1.53	0.00206	4395797	4396146	1.88	0.00018	ribosomal protein L28	19943	D7Wsu21e|MGC107666|MGC115078
Ube2s	chr7	-	4415871	4416220	2.36	0	4415771	4416124	2.34	0	ubiquitin-conjugating enzyme E2S	77891	0910001J09Rik|6720465F12Rik|AA409170|E2-EPF|MGC101982
6430526N21Rik	chr7	+	4623230	4623579	1.41	0.00443	4623230	4623579	1.56	0.00419	RIKEN cDNA 6430526N21 gene	319748	-
Zfp444	chr7	+	5775282	5775631	2.36	0	5774682	5775531	1.92	0.000203	zinc finger protein 444	72667	2810031J10Rik|6230401O10Rik|FLJ00134|mFLJ00134
Zfp667	chr7	+	5888416	5889165	1.74	0.000935	5888516	5888973	1.74	0	zinc finger protein 667	384763	A830025F02Rik|Mip1|ZNF667
Zfp78	chr7	+	5966671	5967320	1.7	0	5966771	5967120	1.83	0.00066	zinc finger protein 78	330463	A330079D15|KRAB12|MGC102644|Zfp77
Zfp28	chr7	+	5986878	5987427	1.37	0.00124	5987078	5987427	1.51	0.00592	zinc finger protein 28	22690	2810438M17Rik|Zfp-28|mkr-5
6430701C03Rik	chr7	-	6885351	6885700	1.66	0.00101	6885351	6885700	1.42	0.00944	RIKEN cDNA 6430701C03 gene	76229	-
LOC665427	chr7	-	6885351	6885700	1.66	0.00101	6885351	6885700	1.42	0.00944	hypothetical protein LOC665427	665427	-
Zfp110	chr7	+	11734589	11735442	1.2	0.00301	11734589	11735038	1.51	0.00592	zinc finger protein 110	65020	2900024E01Rik|N28112|NRIF|Nrif1
Rps5	chr7	+	11822009	11822458	1.28	0.00765	11821909	11822258	1.47	0.00724	ribosomal protein S5	20103	AA617411
Trim28	chr7	+	11923180	11923529	1.78	0.00105	11923180	11923629	2.52	0	tripartite motif protein 28	21849	AA408787|KAP-1|KRIP-1|MGC102100|Tif1b|Tif1beta
Chmp2a	chr7	-	11938747	11939196	1.32	0.00655	11938447	11939805	1.51	0.00418	chromatin modifying protein 2A	68953	1500016L11Rik
Ube2m	chr7	-	11938747	11939196	1.32	0.00655	11938447	11939805	1.51	0.00418	"ubiquitin-conjugating enzyme E2M (UBC12 homolog, yeast)"	22192	MGC25453|MGC37197|UBC12|Ubc-rs2
Prkd2	chr7	+	16000109	16000459	2.03	0.000266	16000109	16000459	2.02	0	protein kinase D2	101540	AI325941|PKD2
Hif3a	chr7	-	16216851	16217600	1.37	0	16217051	16217600	1.74	0	"hypoxia inducible factor 3, alpha subunit"	53417	Ipas|MOP7
Dmwd	chr7	+	18236392	18236741	2.07	0	18236192	18236741	1.92	0	dystrophia myotonica-containing WD repeat motif	13401	59|DMR-N9|Dm9|MGC115779|MGC37679
Gemin7	chr7	-	18736559	18736909	2.94	0	18736459	18736909	2.47	0	gem (nuclear organelle) associated protein 7	69731	2400008I04Rik|AI120175|AI461688
Zfp296	chr7	+	18736559	18736909	2.94	0	18736459	18736909	2.47	0	zinc finger protein 296	63872	2210018A16Rik
Sfrs16	chr7	-	18763015	18763264	1.66	0.00329	18763015	18763264	2.34	0	"splicing factor, arginine/serine-rich 16 (suppressor-of-white-apricot homolog, Drosophila)"	53609	Clasp|MGC118002|Swap2
Irgc1	chr7	-	24154292	24154541	2.32	0	24154292	24154541	2.25	0	"immunity-related GTPase family, cinema 1"	210145	F630044M05Rik|Gm1102|Gm474|Iigp5
Rps19	chr7	+	24592944	24593293	2.48	0	24592944	24593293	2.61	0	ribosomal protein S19	20085	MGC107694
Cd79a	chr7	+	24605952	24606301	2.28	0	24605952	24606301	2.34	0	CD79A antigen (immunoglobulin-associated alpha)	12518	Ig-alpha|Iga|Ly-54|Ly54|mb-1
Grik5	chr7	-	24785406	24786081	1.57	0.00152	24785206	24786081	1.1	0.00877	"glutamate receptor, ionotropic, kainate 5 (gamma 2)"	14809	KA2|MGC118086
Zfp574	chr7	+	24785406	24786081	1.57	0.00152	24785206	24786081	1.1	0.00877	zinc finger protein 574	232976	A630056B21Rik
Gsk3a	chr7	-	24946961	24947310	1.82	0.000805	24946961	24947310	1.42	0.00944	glycogen synthase kinase 3 alpha	606496	-
Gsk3a	chr7	-	24947961	24948321	2.11	0	24947961	24948321	1.92	0.000203	glycogen synthase kinase 3 alpha	606496	-
Lipe	chr7	-	25103997	25104546	1.28	0.00263	25103997	25104546	1.79	0	"lipase, hormone sensitive"	16890	HSL
BC028440	chr7	+	25389039	25389488	1.74	0.000935	25389139	25389488	1.47	0.00724	cDNA sequence BC028440	232987	MGC41256
Tgfb1	chr7	+	25392511	25392760	1.53	0.00516	25392511	25392760	1.97	0.0031	"transforming growth factor, beta 1"	21803	TGF-beta1|Tgfb|Tgfb-1
Hnrpul1	chr7	-	25463713	25464162	1.57	0.00152	25463713	25464062	1.42	0.00944	heterogeneous nuclear ribonucleoprotein U-like 1	232989	E130317O14Rik|E1B-AP5|E1BAP5|MGC36621|MGC78330
Hnrpul1	chr7	-	25464213	25465174	1.57	0.00152	25464513	25464962	1.65	0.00235	heterogeneous nuclear ribonucleoprotein U-like 1	232989	E130317O14Rik|E1B-AP5|E1BAP5|MGC36621|MGC78330
Snrpa	chr7	-	26904926	26905375	1.41	0.00443	26905126	26905479	1.51	0.00592	small nuclear ribonucleoprotein polypeptide A	53607	C430021M15Rik|Rnu1a-1|Rnu1a1|U1A
Prx	chr7	+	27215665	27216014	1.99	0.00023	27215665	27216014	1.92	0.000203	periaxin	19153	L-Periaxin
Prx	chr7	+	27216965	27217214	2.07	0	27216965	27217214	1.79	0.00445	periaxin	19153	L-Periaxin
Zfp60	chr7	+	27440018	27440775	0.87	0.00877	27440118	27440567	1.51	0.00592	zinc finger protein 60	22718	6330516O17Rik|AI426106|AI449354|Mfg-3|Mfg3
Zfp36	chr7	-	28087926	28088375	1.37	0.00508	28087926	28088476	1.37	0.00597	zinc finger protein 36	22695	Gos24|Nup475|TIS11D|TISII|Tis11|Ttp|Zfp-36
Zfp36	chr7	-	28090059	28091009	1.28	0.0081	28090660	28091009	1.42	0.00944	zinc finger protein 36	22695	Gos24|Nup475|TIS11D|TISII|Tis11|Ttp|Zfp-36
Gmfg	chr7	+	28149696	28149945	2.44	0	28149696	28149945	2.29	0	"glia maturation factor, gamma"	63986	0610039G16Rik|2310057N07Rik|AI324845
Samd4b	chr7	-	28149696	28149945	2.44	0	28149696	28149945	2.29	0	sterile alpha motif domain containing 4B	233033	BC042901|MGC30302
5830482F20Rik	chr7	+	28497478	28497927	2.19	0	28497478	28497927	2.29	0	RIKEN cDNA 5830482F20 gene	320435	MGC51433
5830482F20Rik	chr7	+	28504588	28504937	2.15	0	28504588	28504937	2.2	0	RIKEN cDNA 5830482F20 gene	320435	MGC51433
Hnrpl	chr7	+	28519204	28519553	1.66	0.00101	28519104	28519553	1.42	0.00944	heterogeneous nuclear ribonucleoprotein L	15388	C79783|D830027H13Rik
Eif3s12	chr7	-	28691363	28692712	1.32	0	28691363	28692112	1.74	0	"eukaryotic translation initiation factor 3, subunit 12"	73830	1200009C21Rik|eIF3K
Map4k1	chr7	+	28691363	28692712	1.32	0	28691363	28692112	1.74	0	mitogen activated protein kinase kinase kinase kinase 1	26411	Hpk1|mHPK1
Psmd8	chr7	-	28889411	28889660	1.74	0.000741	28889411	28889660	1.88	0.00363	"proteasome (prosome, macropain) 26S subunit, non-ATPase, 8"	57296	6720456J22Rik|AA407360|AL033291|AL033322|AL033323|C76433
A230107C01Rik	chr7	-	28919894	28920743	1.41	0.00142	28919794	28920343	1.88	0	RIKEN cDNA A230107C01 gene	320225	-
6330444E15Rik	chr7	+	29284384	29285743	1.12	0.00421	29284684	29285433	1.65	0	RIKEN cDNA 6330444E15 gene	442797	-
Zfp84	chr7	+	29477061	29477410	3.31	0	29477061	29477410	3.02	0	zinc finger protein 84	74352	4633401C23Rik|BB081605|KRAB18|Zfp69
6330581L23Rik	chr7	+	29524623	29525072	1.57	0.00152	29524723	29525072	1.65	0.00235	RIKEN cDNA 6330581L23 gene	233056	MGC6654
BC027344	chr7	-	29562058	29562407	1.28	0.00765	29561858	29562407	1.79	0	cDNA sequence BC027344	233057	-
Cox7a1	chr7	+	29892945	29893294	1.99	0.00023	29892945	29893294	1.88	0.00018	"cytochrome c oxidase, subunit VIIa 1"	12865	COX7A|COX7AH|COX7AM
0610010E21Rik	chr7	-	30031449	30033198	2.19	0	30031649	30032003	2.06	0	RIKEN cDNA 0610010E21 gene	68332	AI430885|AW490662
AY078069	chr7	+	30128356	30128805	1.82	0.000805	30128356	30128605	1.79	0.00445	cDNA sequence AY078069	243910	IkappaBNS|MGC130396
Hcst	chr7	-	30128356	30128805	1.82	0.000805	30128356	30128605	1.79	0.00445	hematopoietic cell signal transducer	23900	DAP10|KAP10
AY078069	chr7	+	30130857	30131306	1.86	0.000532	30130857	30131306	1.97	0	cDNA sequence AY078069	243910	IkappaBNS|MGC130396
Hcst	chr7	-	30130857	30131306	1.86	0.000532	30130857	30131306	1.97	0	hematopoietic cell signal transducer	23900	DAP10|KAP10
1810054G18Rik	chr7	-	30268312	30268661	2.15	0	30268312	30268661	2.38	0	RIKEN cDNA 1810054G18 gene	75660	-
U2af1l4	chr7	+	30268312	30268661	2.15	0	30268312	30268661	2.38	0	U2 small nuclear RNA auxiliary factor 1-like 4	233073	AA407033|AF419339|AI451269|AW553050|U2af26
Zbtb32	chr7	-	30303127	30303576	2.19	0	30303227	30303576	2.11	0	zinc finger and BTB domain containing 32	58206	4930524C15Rik|FAXF|FAZF|PLZP|Rog|Tzfp
Gramd1a	chr7	-	30860123	30860372	2.23	0	30860123	30860372	1.7	0.00578	GRAM domain containing 1A	52857	1300003M23Rik|AI415002|AW547240|D7Bwg0611e
AI987944	chr7	-	41166663	41167012	1.66	0.00101	41166663	41167012	1.65	0.00235	expressed sequence AI987944	233168	MGC117553|MGC60751
Siglecg	chr7	+	43276042	43276491	1.78	0	43276042	43276491	1.92	0.000203	sialic acid binding Ig-like lectin G	243958	9830164H23|A630096C01Rik|Siglec10|mSiglec-G
BC043301	chr7	+	43430154	43431003	2.23	0	43430154	43431003	1.88	0	cDNA sequence BC043301	210104	MGC102645
Atpbd3	chr7	+	43539722	43540071	1.82	0.000805	43539822	43540371	1.65	0.00112	ATP binding domain 3	233189	BC005752|MGC6894
Spib	chr7	-	44402163	44402512	2.07	0	44402163	44402512	1.74	0.00137	Spi-B transcription factor (Spi-1/PU.1 related)	272382	Spi-B
Nr1h2	chr7	-	44421915	44422364	1.86	0.000532	44421915	44422364	1.56	0.00419	"nuclear receptor subfamily 1, group H, member 2"	22260	AI194859|LXRB|LXRbeta|NER1|OR-1|RIP15|UR|Unr|Unr2
Vrk3	chr7	+	44616243	44617196	1.61	0	44616243	44616792	1.47	0.00724	vaccinia related kinase 3	101568	AI428238
Zfp473	chr7	-	44616243	44617196	1.61	0	44616243	44616792	1.47	0.00724	zinc finger protein 473	243963	4932441F21|D030014N22Rik
Atf5	chr7	-	44683692	44684241	1.49	0.00263	44683792	44684641	1.92	0	activating transcription factor 5	107503	AFTA|Atf7|Atfx|MGC102397|ODA-10
Il4i1	chr7	+	44683692	44684241	1.49	0.00263	44683792	44684641	1.92	0	interleukin 4 induced 1	14204	Fig1|Fig1-ps
Nup62	chr7	+	44683692	44684241	1.49	0.00263	44683792	44684641	1.92	0	nucleoporin 62	18226	AA589433|AI426861|AI790512|AU045898|D7Ertd649e|MGC101995|Nupc1|p62
Il4i1	chr7	+	44703416	44703765	1.66	0.00101	44703416	44703765	2.2	0	interleukin 4 induced 1	14204	Fig1|Fig1-ps
Ap2a1	chr7	-	44797607	44798056	1.49	0.00263	44797807	44798256	1.47	0.00724	"adaptor protein complex AP-2, alpha 1 subunit"	11771	Adtaa
Nosip	chr7	+	44930473	44930822	1.74	0.000935	44930673	44930922	2.25	0	nitric oxide synthase interacting protein	66394	2310061K06Rik|CGI-25|MGC115777
Prrg2	chr7	-	44930473	44930822	1.74	0.000935	44930673	44930922	2.25	0	proline-rich Gla (G-carboxyglutamic acid) polypeptide 2	65116	1600014G02Rik|2510041M06Rik|N4WBP1
Rpl13a	chr7	-	44996772	44997121	1.41	0.00443	44996572	44997221	1.42	0.00944	ribosomal protein L13a	22121	1810026N22Rik|MGC107571|Tstap198-7|tum-antigen
Rps11	chr7	-	44996772	44997121	1.41	0.00443	44996572	44997221	1.42	0.00944	ribosomal protein S11	27207	-
Zfp526	chr7	-	44996772	44997121	1.41	0.00443	44996572	44997221	1.42	0.00944	zinc finger protein 526	210172	D030024H03Rik|MGC106217
Cd37	chr7	-	45106707	45107156	2.11	0	45106707	45107156	2.06	0	CD37 antigen	12493	Tspan26
Cd37	chr7	-	45107307	45107656	2.61	0	45107407	45107656	3.07	0	CD37 antigen	12493	Tspan26
Cd37	chr7	-	45109507	45109857	2.98	0	45109507	45109857	3.16	0	CD37 antigen	12493	Tspan26
Ftl1	chr7	+	45325360	45325811	2.36	0	45325460	45325909	2.11	0	ferritin light chain 1	14325	Ftl|Ftl-1|MGC102130|MGC102131|MGC118079|MGC118080
Ftl1	chr7	-	45327860	45328209	1.28	0.00765	45327860	45328409	1.56	0.00282	ferritin light chain 1	14325	Ftl|Ftl-1|MGC102130|MGC102131|MGC118079|MGC118080
Ftl1	chr7	+	45327860	45328209	1.28	0.00765	45327860	45328409	1.56	0.00282	ferritin light chain 1	14325	Ftl|Ftl-1|MGC102130|MGC102131|MGC118079|MGC118080
Ftl2	chr7	-	45327860	45328209	1.28	0.00765	45327860	45328409	1.56	0.00282	ferritin light chain 2	14337	Ftl|Ftl-2
Bcat2	chr7	+	45436141	45436590	2.36	0	45436141	45436490	1.6	0.00307	"branched chain aminotransferase 2, mitochondrial"	12036	Bcat-2|Eca40
Dbp	chr7	+	45572125	45572974	1.08	0.0039	45572125	45572474	1.42	0.00944	D site albumin promoter binding protein	13170	-
Syngr4	chr7	-	45764398	45764847	1.49	0.00263	45764598	45764947	1.47	0.00724	synaptogyrin 4	58867	1700016O14Rik
Tmem143	chr7	+	45764398	45764847	1.49	0.00263	45764598	45764947	1.47	0.00724	transmembrane protein 143	70209	2310076O21Rik|AI481604
BC013491	chr7	+	45790963	45791312	2.19	0	45790963	45791312	2.11	0	cDNA sequence BC013491	211535	-
Emp3	chr7	-	45790963	45791312	2.19	0	45790963	45791312	2.11	0	epithelial membrane protein 3	13732	H-4|H4|HNMP-1|MI-35|Ymp
Gas2	chr7	+	51747535	51747787	1.95	0	51747535	51747787	1.6	0.00987	growth arrest specific 2	14453	Gas-2
Tjp1	chr7	-	65252355	65252708	1.53	0.00206	65252355	65252708	1.56	0.00419	tight junction protein 1	21872	ZO-1|ZO1
Lrrk1	chr7	-	66267096	66267445	2.11	0	66267096	66267545	1.74	0.00137	leucine-rich repeat kinase 1	233328	AW319595|D130026O16Rik|MGC28646|mKIAA1790
Lrrc28	chr7	-	67518803	67519152	1.28	0.00765	67518803	67519152	1.51	0.00592	leucine rich repeat containing 28	67867	1300004K21Rik|2210012C09Rik|2310058O11Rik
Ttc23	chr7	+	67518803	67519152	1.28	0.00765	67518803	67519152	1.51	0.00592	tetratricopeptide repeat domain 23	67009	1600012K10Rik
Akap13	chr7	+	75483495	75484453	2.03	0.000266	75483395	75484144	1.33	0.00526	A kinase (PRKA) anchor protein 13	75547	1700026G02Rik|5730522G15Rik|AKAP-Lbc|BRX|Ht31|LBC|PROTO-LB|PROTO-LBC
Isg20	chr7	+	78785920	78786269	3.02	0	78785920	78786269	2.89	0	interferon-stimulated protein	57444	1600023I01Rik|2010107M23Rik|20kDa|DnaQL|HEM45
BC025462	chr7	+	79265676	79266025	2.19	0	79265676	79266025	1.97	0	cDNA sequence BC025462	208836	MGC38195|MGC38407
Zfp710	chr7	+	79899396	79899745	1.49	0.00263	79899396	79899745	1.97	0	zinc finger protein 710	209225	5430400N05Rik|9830165K13|AI324798
3110040N11Rik	chr7	-	81662594	81663043	1.49	0.00263	81662294	81662843	1.83	0.00066	RIKEN cDNA 3110040N11 gene	67290	AI851475
Mesdc1	chr7	-	83760385	83761034	1.53	0	83760485	83760934	1.79	0.000905	mesoderm development candidate 1	80889	AW061151
Mesdc2	chr7	+	83767830	83768279	1.53	0.00206	83768030	83768479	1.51	0.00592	mesoderm development candiate 2	67943	2210015O11Rik|AW537813|MGC25959|mKIAA0081
Fah	chr7	-	84481273	84481622	1.7	0.000875	84481273	84482222	1.42	0	fumarylacetoacetate hydrolase	14085	-
0610007P06Rik	chr7	-	89816295	89816644	1.9	0.000387	89816295	89816644	1.47	0.00724	RIKEN cDNA 0610007P06 gene	67669	1110002N09Rik|l7Rn6
2310010J17Rik	chr7	-	90004383	90004732	2.36	0	90004483	90004837	2.66	0	RIKEN cDNA 2310010J17 gene	78329	-
Picalm	chr7	+	90004383	90004732	2.36	0	90004483	90004837	2.66	0	phosphatidylinositol binding clathrin assembly protein	233489	CALM|CLTH|KIAA4114|MGC19382|MGC36413|MGC36616|PAP180|fit-1|fit1|mKIAA4114
2310015N07Rik	chr7	+	92436260	92436609	2.48	0	92436260	92436609	2.34	0	RIKEN cDNA 2310015N07 gene	66365	C86558
Ankrd42	chr7	-	92513377	92513834	1.99	0.00023	92513377	92513834	1.47	0.00724	ankyrin repeat domain 42	73845	4931426M20|4933417L02Rik
4632434I11Rik	chr7	-	92751847	92752196	2.03	0.000266	92751847	92752196	2.38	0	RIKEN cDNA 4632434I11 gene	74041	-
Uvrag	chr7	-	99016555	99016904	2.15	0	99016555	99016904	1.97	0	UV radiation resistance associated gene	78610	9530039D02Rik|AI648770|Uvrag1
Uvrag	chr7	-	99018460	99018712	3.52	0	99018460	99018712	3.53	0	UV radiation resistance associated gene	78610	9530039D02Rik|AI648770|Uvrag1
Rps3	chr7	-	99357559	99357908	2.36	0	99357659	99358008	2.25	0	ribosomal protein S3	27050	D7Ertd795e|Rs_3
Kcne3	chr7	+	100050329	100050678	1.7	0.000875	100050329	100050678	1.74	0.00137	"potassium voltage-gated channel, Isk-related subfamily, gene 3"	57442	2210017H05Rik|MiRP2
AU020772	chr7	+	100245917	100246666	1.16	0.00899	100246017	100246366	1.92	0.000203	expressed sequence AU020772	277939	-
Ppme1	chr7	-	100245917	100246666	1.16	0.00899	100246017	100246366	1.92	0.000203	protein phosphatase methylesterase 1	72590	1110069N17Rik|2700017M01Rik|Pme1
Ucp2	chr7	+	100367195	100367744	1.45	0	100367195	100367544	1.6	0.00307	"uncoupling protein 2 (mitochondrial, proton carrier)"	22228	Slc25a8
B930006L02Rik	chr7	+	100580107	100580456	1.95	0.00021	100580107	100580456	1.83	0.00066	RIKEN cDNA B930006L02 gene	319604	2610030B18Rik|mKIAA0280
Centd2	chr7	+	101256097	101256646	1.16	0.00899	101256097	101256646	1.51	0.00418	"centaurin, delta 2"	69710	2410002L19Rik|mKIAA0782
3200002M19Rik	chr7	+	101770210	101770559	2.52	0	101770310	101770667	2.93	0	RIKEN cDNA 3200002M19 gene	75430	6330414C15Rik
Rhog	chr7	-	102123367	102123816	1.61	0.00113	102123367	102123816	1.79	0.000905	"ras homolog gene family, member G"	56212	Arhg|Sid10750
Stim1	chr7	+	102140094	102140943	1.16	0.00899	102140594	102140943	1.83	0.00066	stromal interaction molecule 1	20866	SIM
Trim34	chr7	+	104118044	104118597	1.78	0.00105	104117844	104119094	1.37	0	tripartite motif protein 34	94094	-
9230105E10Rik	chr7	-	104226608	104227957	1.61	0.00113	104227008	104227357	1.7	0.00149	RIKEN cDNA 9230105E10 gene	319236	TRIM5
A530023O14Rik	chr7	-	104243455	104243804	2.15	0	104243455	104243804	2.57	0	RIKEN cDNA A530023O14 gene	244183	-
Trim30	chr7	-	104338882	104339240	2.19	0	104338682	104339331	2.06	0	tripartite motif protein 30	20128	Rpt-1|Rpt1
AI451617	chr7	-	104381449	104381798	2.07	0	104381449	104381798	2.25	0	expressed sequence AI451617	209387	-
LOC667836	chr7	-	104381449	104381798	2.07	0	104381449	104381798	2.25	0	similar to cyclin fold protein 1	667836	-
Ppfibp2	chr7	+	107385149	107385598	1.74	0.000935	107385149	107385898	1.7	0.00149	"protein tyrosine phosphatase, receptor-type, F interacting protein, binding protein 2"	19024	Cclp1|MGC117695
Ovch2	chr7	-	107593325	107593681	2.61	0	107593325	107593681	1.56	0.00419	ovochymase 2	244199	9230106D23Rik|Ovtn
Rpl27a	chr7	+	109309823	109310172	1.78	0.00105	109309523	109310272	1.6	0.00307	ribosomal protein L27a	26451	L27A|MGC107695|MGC66730
Rab6ip1	chr7	-	109750849	109751098	1.9	0	109750849	109751098	2.34	0	Rab6 interacting protein 1	19347	1500012B19Rik|AJ245569|AW496491|ORF37|mKIAA1091
Zfp143	chr7	+	109852543	109852997	1.28	0.00263	109852543	109852997	1.47	0.00724	zinc finger protein 143	20841	AA959806|AU015869|D7Ertd805e|KRAB14|SBF|Staf|Zfp79|Zfp80-rs1|pHZ-1
Nucb2	chr7	+	116295167	116295516	1.49	0.00263	116295167	116295516	1.7	0.00149	nucleobindin 2	53322	AI607786|Nefa
Rps15a	chr7	-	117908650	117909107	2.28	0	117908550	117909410	1.51	0.00418	ribosomal protein S15a	267019	A630031B11Rik|MGC107552
Arl6ip1	chr7	-	117920447	117920996	1.86	0	117920547	117920996	1.97	0	ADP-ribosylation factor-like 6 interacting protein 1	54208	AIP-6|AL022945|ARMER|AU042858|Aip-1|Arl6ip|C85138|mKIAA0069
2610207I05Rik	chr7	-	118035305	118035756	1.78	0.00105	118035205	118035654	1.88	0.00018	RIKEN cDNA 2610207I05 gene	233789	C130002K18Rik|mKIAA0421
4930583K01Rik	chr7	+	118035305	118035756	1.78	0.00105	118035205	118035654	1.88	0.00018	RIKEN cDNA 4930583K01 gene	67745	-
9030624J02Rik	chr7	+	118531730	118532079	1.61	0.00113	118531730	118532079	1.74	0.00137	RIKEN cDNA 9030624J02 gene	71517	2610029J22Rik
Eef2k	chr7	+	120642809	120643058	2.19	0	120642709	120643058	1.65	0.00235	eukaryotic elongation factor-2 kinase	13631	C86191|eEF-2K
BC066140	chr7	-	121923490	121924339	1.57	0	121923490	121923939	1.47	0.00724	cDNA sequence BC066140	233826	4732427B05
Dctn5	chr7	+	121923490	121924339	1.57	0	121923490	121923939	1.47	0.00724	dynactin 5	59288	4930427E12Rik|C78178
Xpo6	chr7	-	125903949	125904298	2.15	0	125903949	125904298	2.25	0	exportin 6	74204	2610005L19Rik|AI854665|AL022631|C230091E20Rik|R75304|Ranbp20|mKIAA0370
Cd19	chr7	-	126208034	126208485	1.99	0.00023	126208034	126209183	2.29	0	CD19 antigen	12478	AW495831
1500016O10Rik	chr7	+	126583569	126583918	1.95	0.00021	126583569	126583918	1.65	0.00235	RIKEN cDNA 1500016O10 gene	68952	A330104J06Rik|AI413816|AW060769|MGC103222
Ppp4c	chr7	-	126583569	126583918	1.95	0.00021	126583569	126583918	1.65	0.00235	"protein phosphatase 4, catalytic subunit"	56420	1110002D08Rik|AU016079|Ppx
Aldoa	chr7	-	126589269	126590518	1.37	0.00508	126589669	126591118	1.19	0	"aldolase 1, A isoform"	11674	Aldo-1|Aldo1|MGC107164
Cdipt	chr7	+	126766647	126767296	1.45	0	126766447	126767496	1.37	0.00597	CDP-diacylglycerol--inositol 3-phosphatidyltransferase (phosphatidylinositol synthase)	52858	9530042F15Rik|D7Bwg0575e|Pis|Pis1
2900092E17Rik	chr7	-	126807858	126808407	1.24	0.00405	126807858	126808307	1.47	0.00724	RIKEN cDNA 2900092E17 gene	67278	C77040
Mvp	chr7	-	126807858	126808407	1.24	0.00405	126807858	126808307	1.47	0.00724	major vault protein	78388	2310009M24Rik|LRP|VAULT1
LOC668637	chr7	-	126818365	126818714	1.78	0.00105	126818365	126818714	2.2	0	hypothetical protein LOC668637	668637	-
Maz	chr7	-	126818365	126818714	1.78	0.00105	126818365	126818714	2.2	0	MYC-associated zinc finger protein (purine-binding transcription factor)	17188	PUR1|Pur-1|SAF-1|SAF-2
AI467606	chr7	+	126882039	126883088	1.2	0.00585	126882039	126883088	1.33	0	expressed sequence AI467606	101602	-
Cd2bp2	chr7	-	126986685	126987234	1.32	0.00156	126986485	126987234	1.79	0	CD2 antigen (cytoplasmic tail) binding protein 2	70233	1500011B02Rik|2410024K20Rik|AW048183
Mylpf	chr7	+	126999909	127000358	1.41	0.00443	126999909	127000458	1.79	0	"myosin light chain, phosphorylatable, fast skeletal muscle"	17907	2410014J02Rik|MLC-2|Mlc2
Tbc1d10b	chr7	-	126999909	127000358	1.41	0.00443	126999909	127000458	1.79	0	"TBC1 domain family, member 10b"	68449	1110003P22Rik|C87963
Sept1	chr7	-	127009451	127009900	1.41	0.00443	127009251	127009900	1.6	0.00307	septin 1	54204	Diff6|PNUTL3
Itgal	chr7	+	127087221	127087570	2.4	0	127087221	127087570	2.43	0	integrin alpha L	16408	Cd11a|LFA-1|Ly-15|Ly-21
Zfp688	chr7	-	127213179	127213528	1.74	0.000935	127213179	127213528	1.7	0.00149	zinc finger protein 688	69234	2810407K09Rik|AI326029|MGC41678
Fbs1	chr7	+	127269163	127269512	2.19	0	127269063	127269412	1.88	0.00018	fibrosin 1	14123	Fbs
BC061259	chr7	+	127560742	127561091	1.41	0.00443	127560842	127561191	1.51	0.00592	cDNA sequence BC061259	269999	9930124N15
6820429M01	chr7	+	127667334	127667783	1.9	0.000387	127667334	127668183	1.15	0.00405	hypothetical protein 6820429M01	233905	-
Zfp668	chr7	-	127667334	127667783	1.9	0.000387	127667334	127668183	1.15	0.00405	zinc finger protein 668	244219	BC030314|E130018B19Rik|MGC40890
Fus	chr7	+	127758242	127758591	1.74	0.000935	127758142	127758491	1.56	0.00419	"fusion, derived from t(12%3B16) malignant liposarcoma (human)"	233908	D430004D17Rik|D930039C12Rik|Fus1|Tls
Armc5	chr7	+	128025954	128026305	1.86	0.000532	128025954	128026305	2.66	0	armadillo repeat containing 5	233912	AW049683|BC032200|MGC102240|MGC36606
Inpp5f	chr7	+	128402039	128402488	2.86	0	128401939	128402388	2.98	0	inositol polyphosphate-5-phosphatase F	101490	5830435P03Rik|AI115354|AW561896|SAC2|cI-27|mKIAA0966
1110007A13Rik	chr7	-	128535869	128536218	1.74	0.000935	128535869	128536218	1.42	0.00944	RIKEN cDNA 1110007A13 gene	210711	AU017382|BC025641|MGC36596
Sec23ip	chr7	+	128535869	128536218	1.74	0.000935	128535869	128536218	1.42	0.00944	Sec23 interacting protein	207352	D7Ertd373e
Brwd2	chr7	+	129382815	129383164	1.66	0.00101	129382915	129383371	1.74	0.00137	bromodomain and WD repeat domain containing 2	207425	2900055P10Rik|AW489876|MGC47139|Wdr11|mKIAA1351
LOC434249	chr7	-	130657595	130659247	1.74	0.000935	130657695	130658852	1.15	0.00446	hypothetical LOC434249	434249	-
Plekha1	chr7	+	130657595	130659247	1.74	0.000935	130657695	130658852	1.15	0.00446	"pleckstrin homology domain containing, family A (phosphoinositide binding specific) member 1"	101476	AA960558|C920009D07Rik|TAPP1
Hmx2	chr7	+	131340381	131340630	2.52	0	131340381	131340630	2.34	0	H6 homeo box 2	15372	MGC32455|Nkx-5.2|Nkx5-2
Bub3	chr7	+	131351396	131351845	1.28	0.00765	131351396	131351745	1.79	0.000905	budding uninhibited by benzimidazoles 3 homolog (S. cerevisiae)	12237	AU019800|AU021329|AU043350|AW146323|C78067
C430003P19Rik	chr7	+	132698043	132698292	2.81	0	132698043	132698292	3.07	0	RIKEN cDNA C430003P19 gene	109359	AA589499|AI853413
Zranb1	chr7	-	132825579	132826128	1.9	0.000387	132825679	132826228	1.56	0.00419	"zinc finger, RAN-binding domain containing 1"	360216	9330160G10Rik|D7Wsu87e|Gm1956|Trabid
Bnip3	chr7	-	138747989	138748338	1.45	0.00366	138747989	138748445	1.7	0.00149	"BCL2/adenovirus E1B interacting protein 1, NIP3"	12176	Nip3
6430531B16Rik	chr7	-	139830793	139831051	1.49	0.00724	139830793	139831051	1.6	0.00987	RIKEN cDNA 6430531B16 gene	381933	Gm1093
Athl1	chr7	+	140792767	140793116	1.86	0.000532	140792967	140793316	2.11	0	"ATH1, acid trehalase-like 1 (yeast)"	212974	5730511L01Rik|BC023151|MGC28193
Tnni2	chr7	+	142251969	142252418	1.95	0.00021	142252069	142252418	2.06	0	"troponin I, skeletal, fast 2"	21953	-
Lsp1	chr7	+	142270196	142270545	1.74	0.000935	142269996	142270445	2.29	0	lymphocyte specific 1	16985	Lsp-1|WP34|p50|pp52
Tspan32	chr7	+	142814091	142815440	0.99	0	142813791	142815540	1.19	0	tetraspanin 32	27027	AW208513|Art-1|BB235973|D7Wsu37e|Phemx|Tssc6
R74862	chr7	-	142864334	142864683	1.9	0.000387	142864334	142864683	1.6	0.00307	expressed sequence R74862	97423	-
Tssc4	chr7	+	142878413	142878762	1.86	0.000532	142878313	142878762	1.74	0.00137	tumor-suppressing subchromosomal transferable fragment 4	56844	AA241958|ESTM671070
Dhcr7	chr7	+	143638825	143639174	1.78	0.00105	143638825	143639174	1.65	0.00235	7-dehydrocholesterol reductase	13360	AA409147
1700019B03Rik	chr8	+	3467387	3467736	1.59	0.00152	3467387	3467736	1.43	0.00944	RIKEN cDNA 1700019B03 gene	76406	-
Pex11c	chr8	-	3467387	3467736	1.59	0.00152	3467387	3467736	1.43	0.00944	peroxisomal biogenesis factor 11c	69129	1810022F11Rik|1810049N02Rik|gamma
Ccl25	chr8	+	4347937	4348489	1.34	0.00655	4348237	4348686	1.75	0.00137	chemokine (C-C motif) ligand 25	20300	AI852536|CKb15|Scya25|TECK
LOC623223	chr8	+	4675211	4675961	1.43	0.00443	4675211	4675660	1.7	0.00149	hypothetical LOC623223	623223	-
LOC623223	chr8	+	4677811	4678260	2.14	0	4677811	4678260	1.89	0.00018	hypothetical LOC623223	623223	-
LOC665044	chr8	-	4677811	4678260	2.14	0	4677811	4678260	1.89	0.00018	hypothetical protein LOC665044	665044	-
Erich1	chr8	-	14090228	14090777	1.43	0.00142	14090028	14090677	1.38	0	glutamate-rich 1	234086	-
Plat	chr8	+	24223041	24223390	1.85	0.000805	24222941	24223390	1.66	0.00235	"plasminogen activator, tissue"	18791	AU020998|AW212668|D8Ertd2e|MGC18508|t-PA|tPA
1700041G16Rik	chr8	+	24274061	24274421	2.1	0	24274061	24274421	2.07	0	RIKEN cDNA 1700041G16 gene	73299	Jems
Ap3m2	chr8	-	24274061	24274421	2.1	0	24274061	24274421	2.07	0	"adaptor-related protein complex 3, mu 2 subunit"	64933	5830445E16Rik|AP-3B
Plekha2	chr8	-	26568127	26569576	1.59	0	26568227	26569376	1.84	0	"pleckstrin homology domain-containing, family A (phosphoinositide binding specific) member 2"	83436	6430512N22Rik|AI851530|AU041791|TAPP2|W91773
Ppapdc1	chr8	+	27185231	27185780	1.47	0.00366	27185231	27185780	1.66	0.00235	phosphatidic acid phosphatase type 2 domain containing 1	71910	1810019D05Rik|2310022A04Rik|AW045471
Ash2l	chr8	-	27306358	27306907	1.55	0.00206	27306558	27307007	1.47	0.00724	"ash2 (absent, small, or homeotic)-like (Drosophila)"	23808	-
Prosc	chr8	+	28508374	28508623	1.85	0	28508374	28508623	1.7	0.00578	proline synthetase co-transcribed	114863	1700024N20Rik|2200002F22Rik
Tnks	chr8	-	36434238	36434593	2.22	0	36434238	36434593	2.16	0	"tankyrase, TRF1-interacting ankyrin-related ADP-ribose polymerase"	21951	4930554K12Rik|AI662855|C86528|D130072O21Rik
Thex1	chr8	-	36963948	36964397	1.47	0.00366	36964148	36964497	1.8	0.000905	three prime histone mRNA exonuclease 1	67276	3'hexo|3110010F15Rik
AI429214	chr8	+	38462048	38462597	1.3	0.00263	38462148	38462697	1.52	0.00418	expressed sequence AI429214	621080	-
BC065112	chr8	-	48115584	48115933	2.1	0	48115584	48115933	1.57	0.00419	cDNA sequence BC065112	408022	MGC86034
Casp3	chr8	+	48115584	48115933	2.1	0	48115584	48115933	1.57	0.00419	caspase 3	12367	A830040C14Rik|Apopain|CPP32|Caspase-3|Lice|Yama
Irf2	chr8	+	48238139	48238689	1.85	0	48238039	48238488	1.98	0	interferon regulatory factor 2	16363	9830146E22Rik|AI646973|Irf-2|MGC117893
4921511I16Rik	chr8	-	49213266	49213515	2.22	0	49213266	49213515	1.7	0.00578	RIKEN cDNA 4921511I16 gene	70925	AW208986|CARF
Nat2	chr8	+	70423613	70423962	3.06	0	70423613	70423962	2.72	0	N-acetyltransferase 2 (arylamine N-acetyltransferase)	17961	AV377607
Ndufa13	chr8	-	72830556	72830905	1.43	0.00443	72830556	72830905	1.43	0.00944	"NADH dehydrogenase (ubiquinone) 1 alpha subcomplex, 13"	67184	2700054G14Rik|AU022060|CDA016|CGI-39|GRIM-19|Grim19
Tssk6	chr8	+	72830556	72830905	1.43	0.00443	72830556	72830905	1.43	0.00944	testis-specific serine kinase 6	83984	Sstk
Klhl26	chr8	-	73406043	73406992	1.47	0.00658	73406243	73406692	1.43	0.00944	kelch-like 26 (Drosophila)	234378	C630013N10Rik|Klkl26|MGC38024
Ssbp4	chr8	-	73539212	73539561	2.31	0	73539112	73539461	2.07	0	single stranded DNA binding protein 4	76900	1210002E11Rik|AW743380|Sspb4
Ifi30	chr8	-	73697288	73697637	1.72	0.000875	73697288	73697637	1.66	0.00235	interferon gamma inducible protein 30	65972	GILT|IP30
Pik3r2	chr8	-	73705958	73706407	1.43	0.00443	73705858	73706507	1.29	0.00114	"phosphatidylinositol 3-kinase, regulatory subunit, polypeptide 2 (p85 beta)"	18709	-
Arrdc2	chr8	-	73768383	73769032	1.34	0.00156	73768383	73768832	1.43	0.00944	arrestin domain containing 2	70807	4632416I05Rik|Ilad1
Rpl18a	chr8	-	73826538	73826887	1.76	0.000935	73826438	73827487	1.24	0.00211	Ribosomal protein L18A	76808	2510019J09Rik
Slc5a5	chr8	-	73826538	73826887	1.76	0.000935	73826438	73827487	1.24	0.00211	"solute carrier family 5 (sodium iodide symporter), member 5"	114479	NIS
2010315L10Rik	chr8	+	74295980	74296329	1.64	0.00113	74295980	74296329	1.7	0.00149	RIKEN cDNA 2010315L10 gene	67023	5730403H22Rik|AV002165|Ed2|mED2
9430098E02Rik	chr8	+	74295980	74296329	1.64	0.00113	74295980	74296329	1.7	0.00149	RIKEN cDNA 9430098E02 gene	77090	AI593544
Unc13a	chr8	-	74557259	74557812	1.97	0.00021	74557259	74558211	1.75	0.00137	unc-13 homolog A (C. elegans)	382018	2410078G03Rik|C630025L14|Munc13-1
Zfp617	chr8	+	74851555	74851904	1.38	0.00508	74851455	74851904	1.47	0.00724	zinc finger protein 617	170938	Zfps11-6
Ap1m1	chr8	+	75168895	75169244	1.85	0.000805	75168795	75169144	1.93	0.000203	"adaptor-related protein complex AP-1, mu subunit 1"	11767	AA408894|AP47|Adtm1A|Cltnm|[m]1A|mu1A
9130011J15Rik	chr8	-	75499850	75500299	1.3	0.00263	75499850	75500799	1.15	0.00446	RIKEN cDNA 9130011J15 gene	66818	-
Tmem38a	chr8	+	75499850	75500299	1.3	0.00263	75499850	75500799	1.15	0.00446	transmembrane protein 38a	74166	1110001E17Rik|AI413399
Tmem34	chr8	-	80506609	80506958	2.64	0	80506609	80506958	2.21	0	transmembrane protein 34	234463	8430433H16Rik|AI645453|AL033298|BC004056|MGC8158
Asf1b	chr8	+	86845177	86845626	1.51	0.00263	86845177	86845626	1.43	0.00944	ASF1 anti-silencing function 1 homolog B (S. cerevisiae)	66929	1700003K02Rik|AA409591
Lphn1	chr8	-	86845177	86845626	1.51	0.00263	86845177	86845626	1.43	0.00944	latrophilin 1	330814	2900070I05Rik|AI182398|CLIBA|Lec2|MGC109680|mKIAA0821
Ier2	chr8	-	87553992	87554341	1.51	0.00263	87553992	87554341	1.57	0.00419	immediate early response 2	15936	AI317238|ch1|pip92
Btbd14b	chr8	-	87578945	87579394	1.59	0.00152	87578945	87579394	1.52	0.00592	BTB (POZ) domain containing 14B	66830	2010001H03Rik|4930511N13Rik|Nac1
Trmt1	chr8	+	87578945	87579394	1.59	0.00152	87578945	87579394	1.52	0.00592	TRM1 tRNA methyltransferase 1 homolog (S. cerevisiae)	212528	6720406L13Rik|6720477L24|D8Ertd812e
Lyl1	chr8	+	87591298	87592047	1.59	0	87591298	87592447	1.8	0	lymphoblastomic leukemia	17095	Lyl-1
Junb	chr8	-	87868750	87869099	2.05	0.000266	87868750	87869099	1.93	0.000203	Jun-B oncogene	16477	-
Junb	chr8	-	87870850	87871199	1.34	0.00655	87870850	87871199	1.52	0.00592	Jun-B oncogene	16477	-
LOC244556	chr8	-	88016159	88016408	1.47	0.00953	88016159	88016408	1.8	0.00445	similar to hypothetical protein FLJ90396	244556	MGC117728
Dnaja2	chr8	-	88447026	88447481	1.59	0.00152	88446626	88447481	1.93	0.000203	"DnaJ (Hsp40) homolog, subfamily A, member 2"	56445	2010206B19Rik|DNAJ|DNJ3|Dnaj3|HIRIP4|PRO3015|mDj3
1300002A08Rik	chr8	+	89513859	89514308	1.51	0.00263	89513559	89514308	1.52	0	RIKEN cDNA 1300002A08 gene	66887	AU015403|Lonp
5033428A16Rik	chr8	+	91008474	91009533	1.47	0	91008474	91008825	1.84	0.00066	RIKEN cDNA 5033428A16 gene	382030	-
9130017C17Rik	chr8	-	91526089	91526444	1.93	0.000387	91526089	91526444	2.44	0	RIKEN cDNA 9130017C17 gene	71607	-
9130017C17Rik	chr8	-	91527789	91528242	1.47	0.00366	91526889	91528242	1.38	0	RIKEN cDNA 9130017C17 gene	71607	-
Rbl2	chr8	+	93960687	93960939	1.8	0	93960687	93960939	2.35	0	retinoblastoma-like 2	19651	Rb2|p130
Nudt21	chr8	-	96926119	96926468	1.68	0.00101	96926119	96926468	1.61	0.00307	nudix (nucleoside diphosphate linked moiety X)-type motif 21	68219	25kDa|3110048P04Rik|5730530J16Rik|AU014860|AW549947|Cpsf5
Ogfod1	chr8	+	96926119	96926468	1.68	0.00101	96926119	96926468	1.61	0.00307	2-oxoglutarate and iron-dependent oxygenase domain containing 1	270086	4930415J21Rik|AA387199|AA939912|AW061076|mKIAA1612
Cpne2	chr8	+	97440853	97441202	1.89	0.000532	97440653	97441202	1.66	0.00112	copine II	234577	MGC30751|MGC37787
Ccdc102a	chr8	-	97808337	97809086	1.26	0.00405	97808737	97809086	1.61	0.00307	coiled-coil domain containing 102A	234582	BC027663|Gm586
Gpr114	chr8	+	97808337	97809086	1.26	0.00405	97808737	97809086	1.61	0.00307	G protein-coupled receptor 114	382045	Gm1109|PGR27
Gpr114	chr8	+	97812637	97813186	1.34	0.00156	97812637	97812986	1.52	0.00592	G protein-coupled receptor 114	382045	Gm1109|PGR27
Gtl3	chr8	-	98323971	98324530	1.55	0	98323971	98324320	1.84	0.00066	gene trap locus 3	14894	2600014O15Rik|AL024127|T10-2A2
Cmtm3	chr8	+	107228972	107229621	2.1	0	107229172	107230021	1.66	0.00112	CKLF-like MARVEL transmembrane domain containing 3	68119	9430096L06Rik|AI413895|BNAS2|Cklfsf3
Rrad	chr8	-	107521197	107521548	1.64	0.00113	107520897	107521946	1.34	0.00526	Ras-related associated with diabetes	56437	REM3|Rad
1110019N10Rik	chr8	-	107530581	107531030	1.72	0.000875	107530581	107531130	1.7	0	RIKEN cDNA 1110019N10 gene	68523	-
Cbfb	chr8	+	108059595	108059944	2.05	0.000266	108058781	108059844	2.12	0	core binding factor beta	12400	AI893578|PEA2|PEBP2b|Pebp2|Pebpb2
4931428F04Rik	chr8	-	108178429	108179478	1.85	0.000805	108178229	108178979	1.84	0.00066	RIKEN cDNA 4931428F04 gene	74356	AI426165
Hspc171	chr8	+	108215256	108215605	1.76	0.000935	108215256	108215605	1.93	0.000203	HSPC171 protein	66320	1700006C06Rik|2610030K20Rik|MGC25457
Lrrc29	chr8	-	108215256	108215605	1.76	0.000935	108215256	108215605	1.93	0.000203	leucine rich repeat containing 29	234684	A630024J02Rik|FBL9|FBXL9
Dpep2	chr8	-	108880138	108880387	1.68	0.00329	108880138	108880387	2.03	0.00343	dipeptidase 2	319446	F630103D06Rik|MBD-2
Dpep2	chr8	-	108881638	108881887	2.26	0	108881638	108881887	2.3	0	dipeptidase 2	319446	F630103D06Rik|MBD-2
Smpd3	chr8	-	109228067	109228619	2.47	0	109228067	109228517	2.03	0	"sphingomyelin phosphodiesterase 3, neutral"	58994	4631433G07Rik|AI427456|AW537966|fro|nSMase2
Zfp90	chr8	+	109301259	109301608	2.14	0	109301259	109301608	1.84	0.00066	zinc finger protein 90	22751	6430515L01Rik|KRAB17|NK10|Zfp64|Zfp83|mKIAA1954
Zfp90	chr8	+	109304959	109305208	2.35	0	109304959	109305208	2.16	0.00139	zinc finger protein 90	22751	6430515L01Rik|KRAB17|NK10|Zfp64|Zfp83|mKIAA1954
Cog8	chr8	-	109945655	109946104	1.55	0	109945755	109946104	1.66	0.00235	component of oligomeric golgi complex 8	97484	C87832
Nip7	chr8	+	109945655	109946104	1.55	0	109945755	109946104	1.66	0.00235	nuclear import 7 homolog (S. cerevisiae)	66164	1110017C15Rik|AA408773
Nfat5	chr8	+	110180448	110180797	1.93	0.000387	110180448	110180797	2.21	0	nuclear factor of activated T-cells 5	54446	AI225870|B130038B15Rik|CAG-8|CAG80|NFATL1|OREBP|TonEBP|mKIAA0827|nfatz
Nfat5	chr8	+	110181848	110182697	1.3	0.00765	110181048	110182597	0.97	0.00679	nuclear factor of activated T-cells 5	54446	AI225870|B130038B15Rik|CAG-8|CAG80|NFATL1|OREBP|TonEBP|mKIAA0827|nfatz
Txnl4b	chr8	+	112453083	112453436	1.34	0.00655	112452883	112453436	1.61	0.00307	thioredoxin-like 4B	234723	AI595343|D530025J19Rik|DLP|Dim2
4930566A11Rik	chr8	+	112595766	112596315	1.59	0	112596066	112596425	1.47	0.00724	RIKEN cDNA 4930566A11 gene	75871	-
LOC668079	chr8	-	112595766	112596315	1.59	0	112596066	112596425	1.47	0.00724	hypothetical protein LOC668079	668079	-
BC025546	chr8	+	113106780	113107229	1.3	0.00263	113106480	113107229	1.52	0.00592	cDNA sequence BC025546	234728	AU022703|C730036L12Rik|MGC38131
Cog4	chr8	+	113732717	113733266	1.22	0.00301	113732617	113733166	1.89	0.00018	component of oligomeric golgi complex 4	102339	AW554810|D8Ertd515e
Sf3b3	chr8	-	113732717	113733266	1.22	0.00301	113732617	113733166	1.89	0.00018	"splicing factor 3b, subunit 3"	101943	1810061H24Rik|5730409A01Rik|AA409318|D8Ertd633e|RSE1|SAP130|mKIAA0017
St3gal2	chr8	+	113841614	113841863	2.89	0	113841614	113841863	3.32	0	"ST3 beta-galactoside alpha-2,3-sialyltransferase 2"	20444	AI429591|AW822065|ST3GalII|Siat5
Wdr59	chr8	-	114408710	114409066	1.68	0.00101	114408710	114409066	1.93	0.000203	WD repeat domain 59	319481	5430401O09Rik
Adat1	chr8	-	114878871	114879133	1.85	0	114878871	114879133	2.26	0	"adenosine deaminase, tRNA-specific 1"	30947	MMADAT1|mADAT1
Plcg2	chr8	+	120384717	120384966	1.85	0	120384717	120384966	1.89	0.00363	"phospholipase C, gamma 2"	234779	MGC38590|Plcg-2
2310061F22Rik	chr8	+	125360038	125360593	1.59	0	125360038	125360593	2.12	0	RIKEN cDNA 2310061F22 gene	66965	-
Cbfa2t3h	chr8	-	125586819	125587068	2.98	0	125586819	125587068	3.32	0	"core-binding factor, runt domain, alpha subunit 2, translocated to, 3 homolog (human)"	12398	A630044F12Rik|ETO-2|MTGR2
Zfp276	chr8	+	126137034	126137683	1.8	0	126137034	126137283	2.03	0.00343	zinc finger protein (C2H2 type) 276	57247	AW048709|D8Ertd370e|D8Ertd377e
Tubb3	chr8	+	126297101	126297450	1.76	0.000935	126296601	126297358	2.12	0	"tubulin, beta 3"	22152	3200002H15Rik|M(beta)3|M(beta)6
A630001O12Rik	chr8	+	129725372	129725723	1.64	0.00113	129725272	129725723	1.75	0.00137	RIKEN cDNA A630001O12 gene	414091	-
Casp1	chr9	+	5298477	5298829	1.96	0.000387	5298477	5298829	2.1	0	caspase 1	12362	ICE|Il1bc
Birc3	chr9	-	7873254	7873706	2.04	0.00023	7873454	7873803	1.82	0.000905	baculoviral IAP repeat-containing 3	11796	AW107670|Api1|Api2|Birc2|HIAP2|IAP1|IAP2|MIAP1|MIAP2|MIHB|MIHC|RNF49|cIAP-1|cIAP-2|cIAP1|cIAP2
Cep57	chr9	-	13571133	13571489	2.64	0	13571133	13571489	3.13	0	centrosomal protein 57	74360	3110002L15Rik|4921510P06Rik|4931428M20Rik|AI467480|Tsp57|mKIAA0092
2810485I05Rik	chr9	+	13577773	13578122	1.32	0.00765	13577773	13578122	1.63	0.00307	RIKEN cDNA 2810485I05 gene	72826	C78303
Cep57	chr9	-	13577773	13578122	1.32	0.00765	13577773	13578122	1.63	0.00307	centrosomal protein 57	74360	3110002L15Rik|4921510P06Rik|4931428M20Rik|AI467480|Tsp57|mKIAA0092
Zfp560	chr9	-	20135310	20135759	2.13	0	20135310	20135859	1.68	0.00112	zinc finger protein 560	434377	2310030G09Rik|Znf560
Zfp426	chr9	-	20242885	20243434	1.36	0.00156	20242785	20243234	1.45	0.00944	zinc finger protein 426	235028	2900057C04Rik|KIAA4237|KRAB1|MGC38791|Zfo61|Zfp68-rs1|mKIAA4237
Fbxl12	chr9	-	20395212	20395761	1.62	0	20395112	20395561	1.77	0.00137	F-box and leucine-rich repeat protein 12	30843	3110048D16Rik|Fbl12
Ubl5	chr9	+	20395212	20395761	1.62	0	20395112	20395561	1.77	0.00137	ubiquitin-like 5	66177	1110030M22Rik|beacon
Icam1	chr9	+	20765611	20765960	2.68	0	20765511	20765860	2.47	0	intercellular adhesion molecule	15894	CD54|Icam-1|Ly-47|MALA-2|MGC6195
1810026J23Rik	chr9	+	21342973	21343422	1.56	0.00393	21342873	21343322	1.34	0.00946	RIKEN cDNA 1810026J23 gene	69773	-
Yipf2	chr9	-	21342973	21343422	1.56	0.00393	21342873	21343322	1.34	0.00946	"Yip1 domain family, member 2"	74766	1300010K09Rik
2310047B19Rik	chr9	-	21705806	21706155	1.42	0.00805	21705806	21706155	1.47	0.00418	RIKEN cDNA 2310047B19 gene	66962	-
2310047B19Rik	chr9	+	21705806	21706155	1.42	0.00805	21705806	21706155	1.47	0.00418	RIKEN cDNA 2310047B19 gene	66962	-
C330001K17Rik	chr9	-	21752886	21753535	1.85	0	21752886	21753335	1.8	0.000435	RIKEN cDNA C330001K17 gene	77609	AI644415
Prkcsh	chr9	+	21752886	21753535	1.85	0	21752886	21753335	1.8	0.000435	protein kinase C substrate 80K-H	19089	80K-H
Herpud2	chr9	-	24900991	24901340	1.94	0.00102	24900991	24901340	1.71	0.00144	HERPUD family member 2	80517	5031400M07Rik|AB041580
Dcps	chr9	-	34925299	34925651	1.66	0.00331	34925299	34925651	1.61	0.00245	"decapping enzyme, scavenger"	69305	1700001E16Rik|AA408441
Slc37a2	chr9	-	37005235	37005584	1.99	0.000795	37005135	37005792	1.52	0.00294	"solute carrier family 37 (glycerol-3-phosphate transporter), member 2"	56857	G3PP|Slc37a1|cI-2|ci2
BC024479	chr9	+	37238241	37238690	1.71	0.00293	37238441	37238790	1.57	0.00239	cDNA sequence BC024479	235184	MGC37388
Cbl	chr9	-	43987702	43988053	1.99	0.000795	43987702	43988053	1.94	0	Casitas B-lineage lymphoma	12402	4732447J05Rik|Cbl-2|c-Cbl|cbl
Rps25	chr9	+	44157933	44158882	1.99	0	44157933	44158282	1.8	0.000435	ribosomal protein S25	75617	2810009D21Rik
Trappc4	chr9	-	44157933	44158882	1.99	0	44157933	44158282	1.8	0.000435	trafficking protein particle complex 4	60409	1500017G03Rik|AI303617|HSPC172|PTD009|Sbd|Sbdn|Sdcbp2|TRS23
Bcl9l	chr9	+	44233078	44233427	1.56	0.0042	44233078	44233427	1.38	0.00725	B-cell CLL/lymphoma 9-like	80288	B9L|BC003321|BCL9-2|DLNB11|MGC7014
C030014I23Rik	chr9	-	44233078	44233427	1.56	0.0042	44233078	44233427	1.38	0.00725	RIKEN cDNA C030014I23 gene	77381	-
Atp5l	chr9	-	44671708	44672060	1.75	0.00253	44671708	44672157	1.71	0.00144	"ATP synthase, H+ transporting, mitochondrial F0 complex, subunit g"	27425	4933437C06Rik|MGC107313|MGC107547
BC033915	chr9	+	45760622	45760871	3.27	0	45760622	45760871	2.9	0	cDNA sequence BC033915	70661	5730525O22Rik|AI447252|AI846254|AI849445|MGC90906|MGC91236|mKIAA0999
1600029D21Rik	chr9	+	50243904	50244254	2.75	0	50243804	50244254	2.49	0	RIKEN cDNA 1600029D21 gene	76509	0610037B23Rik|AA407923|AU043048|PLET1
Bcdo2	chr9	-	50305882	50306131	2.56	0	50305382	50306131	2.12	0	"beta-carotene 9', 10'-dioxygenase 2"	170752	B-diox-II|MGC129322|MGC129323
Pou2af1	chr9	+	50962969	50963526	1.61	0.00368	50962969	50963526	1.71	0.00144	"POU domain, class 2, associating factor 1"	18985	BOB.1|Bob1|OBF-1|OBF.1|OCA-B|OCAB
Atm	chr9	-	53298191	53298747	1.66	0.00331	53298691	53299140	1.66	0.00145	ataxia telangiectasia mutated homolog (human)	11920	AI256621|C030026E19Rik
Npat	chr9	+	53298191	53298747	1.66	0.00331	53298691	53299140	1.66	0.00145	nuclear protein in the AT region	244879	6820401K01|AI427561|BB112559
Atm	chr9	-	53298991	53299440	1.56	0.0042	53298691	53299140	1.66	0.00145	ataxia telangiectasia mutated homolog (human)	11920	AI256621|C030026E19Rik
Npat	chr9	+	53298991	53299440	1.56	0.0042	53298691	53299140	1.66	0.00145	nuclear protein in the AT region	244879	6820401K01|AI427561|BB112559
Rab39	chr9	-	53468757	53469106	1.99	0.000795	53468457	53469206	1.34	0	"RAB39, member RAS oncogene family"	270160	C230094F14Rik
Ireb2	chr9	+	54661175	54662024	1.94	0.00102	54661775	54662124	1.38	0.00725	iron responsive element binding protein 2	64602	D9Ertd85e|DKFZp564D1164|Irp2
C230081A13Rik	chr9	-	56217100	56217457	2.08	0.00078	56217100	56217457	2.17	0	RIKEN cDNA C230081A13 gene	244895	1110049L02Rik|9530046P14|AA690169|BE132841|mKIAA2002
Hmg20a	chr9	+	56217100	56217457	2.08	0.00078	56217100	56217457	2.17	0	high mobility group 20A	66867	1200004E06Rik|5730490E10Rik|Ibraf
Sin3a	chr9	+	56871494	56872243	2.08	0.00078	56871694	56872143	1.75	0.000822	"transcriptional regulator, SIN3A (yeast)"	20466	AW553200|KIAA4126|Sin3|mKIAA4126|mSin3A
Scamp2	chr9	+	57358599	57359659	1.04	0.00967	57359199	57359659	1.94	0	secretory carrier membrane protein 2	24044	AI875466|Sc2
Pml	chr9	-	58047770	58048119	2.8	0	58047770	58048919	2.3	0	promyelocytic leukemia	18854	1200009E24Rik|AI661194|Trim19
Stoml1	chr9	+	58047770	58048119	2.8	0	58047770	58048919	2.3	0	stomatin-like 1	69106	1810015E19Rik|AI847431|SLP-1|STORP|UNC-24|WPB72
Adpgk	chr9	+	59089133	59089582	1.71	0.00293	59089133	59089482	1.47	0.00418	ADP-dependent glucokinase	72141	2610017G09Rik|Adp-gk|C77577
Arih1	chr9	-	59285009	59285366	1.94	0.00102	59284809	59285158	1.43	0.00544	ariadne ubiquitin-conjugating enzyme E2 binding protein homolog 1 (Drosophila)	23806	ARI|AU021774|Ari1|HARI|HHARI|UBCH7BP|UIP77
Pias1	chr9	-	62778832	62779682	1.56	0.0042	62778732	62779181	1.34	0.00946	protein inhibitor of activated STAT 1	56469	2900068C24Rik|Ddxbp1|GBP
Snapc5	chr9	+	63977130	63977579	1.61	0.00368	63976530	63977379	1.38	0.00725	"small nuclear RNA activating complex, polypeptide 5"	330959	2010103A03Rik
F730015K02Rik	chr9	+	64608811	64609160	1.89	0.00102	64608911	64609360	1.61	0.00245	RIKEN cDNA F730015K02 gene	319526	-
2010321M09Rik	chr9	+	64758794	64759243	2.08	0.00078	64758694	64759243	1.57	0	RIKEN cDNA 2010321M09 gene	69882	-
Ptplad1	chr9	-	64819849	64820598	1.71	0.00293	64819849	64820300	1.94	0	protein tyrosine phosphatase-like A domain containing 1	57874	4930523M17Rik|AW742319|B-ind1|Hspc121|MGC25483
Clpx	chr9	+	65091067	65092116	1.66	0	65091667	65092116	1.57	0.00239	caseinolytic peptidase X (E.coli)	270166	AU014732|E330029I21
Ostb	chr9	-	65222443	65222794	1.8	0.00198	65222443	65222794	2.03	0	organic solute transporter beta	330962	-
Csnk1g1	chr9	+	65707506	65708461	1.42	0.00805	65707606	65707965	1.38	0.00725	"casein kinase 1, gamma 1"	214897	9130020E21Rik
Trip4	chr9	-	65707506	65708461	1.42	0.00805	65707606	65707965	1.38	0.00725	thyroid hormone receptor interactor 4	56404	4930558E03Rik|ASC-1|BB191711
Rab8b	chr9	-	66718048	66718397	2.46	0	66718048	66718397	1.71	0.00144	"RAB8B, member RAS oncogene family"	235442	5930437D16|D330025I23Rik
Bnip2	chr9	+	69792091	69792540	1.47	0.00597	69792191	69792651	1.38	0.00725	"BCL2/adenovirus E1B interacting protein 1, NIP2"	12175	5730523P12Rik|BNIP2beta|Nip21
Aldh1a2	chr9	+	71012244	71012593	2.18	0.000759	71012244	71012593	1.43	0.00544	"aldehyde dehydrogenase family 1, subfamily A2"	19378	AV116159|Aldh1a7|RALDH-2|Raldh1|Raldh2
Grinl1a	chr9	-	71286613	71286971	1.52	0.0052	71286613	71286971	2.07	0	"glutamate receptor, ionotropic, N-methyl D-aspartate-like 1A"	28015	AA407243|AA408799|AI303746|AW553238|D9Wsu138e|KIAA4185|mKIAA4185
Tex9	chr9	-	72290773	72291126	2.89	0	72290773	72291126	2.3	0	testis expressed gene 9	21778	tsec-1
Rfxdc2	chr9	+	72330188	72330537	2.08	0.00078	72330188	72330537	1.61	0.00245	regulatory factor X domain containing 2 homolog (human)	319758	2510005N23Rik|9930116O05Rik|D130086K05Rik
Nedd4	chr9	+	72458663	72459119	1.56	0.0042	72458663	72459119	1.52	0.00294	"neural precursor cell expressed, developmentally down-regulted gene 4"	17999	AA959633|AL023035|AU019897|E430025J12Rik|Nedd4-1|Nedd4a|mKIAA0093
Arpp19	chr9	+	74823586	74824335	1.94	0.00102	74823986	74824435	1.43	0.00544	cAMP-regulated phosphoprotein 19	59046	19kDa|ARPP-19|AW559096|Arpp12
Slc17a5	chr9	-	78374149	78374498	2.7	0	78373949	78374498	2.4	0	"solute carrier family 17 (anion/sugar transporter), member 5"	235504	4631416G20Rik|4732491M05|AST|ISSD|NSD|SD|SIALIN|SIASD|SLD
Irak1bp1	chr9	+	82625767	82626117	1.89	0.00102	82625667	82626016	1.38	0.00725	interleukin-1 receptor-associated kinase 1 binding protein 1	65099	4921528N06Rik|AI851240|AIP70|Aabp3|SIMPL
Hmgn3	chr9	-	82943193	82943542	1.94	0.00102	82943193	82943542	1.52	0.00294	high mobility group nucleosomal binding domain 3	94353	1110002A15Rik|6330514M13Rik|BB071015|HMGN3a|HMGN3b|TRIP7
Ibtk	chr9	-	85545273	85545622	1.99	0.000795	85545273	85545622	1.71	0.00144	inhibitor of Bruton agammaglobulinemia tyrosine kinase	108837	5430411K16Rik|AA409502|BTKI|mKIAA1417
Bcl2a1a	chr9	-	88529706	88530061	2.94	0	88529706	88530061	2.44	0	B-cell leukemia/lymphoma 2 related protein A1a	12044	A1|BB218357|Bcl2a1|Bfl-1|Hbpa1
Bcl2a1d	chr9	-	88529706	88530061	2.94	0	88529706	88530061	2.44	0	B-cell leukemia/lymphoma 2 related protein A1d	12047	A1-d
Bcl2a1a	chr9	+	88753262	88754219	1.75	0.00253	88753062	88754911	1.43	0.00247	B-cell leukemia/lymphoma 2 related protein A1a	12044	A1|BB218357|Bcl2a1|Bfl-1|Hbpa1
4930579C12Rik	chr9	-	88977431	88977783	2.94	0	88977431	88977783	1.94	0	RIKEN cDNA 4930579C12 gene	319213	-
Bcl2a1a	chr9	+	88995471	88996528	1.8	0.00198	88995471	88996528	1.11	0.00219	B-cell leukemia/lymphoma 2 related protein A1a	12044	A1|BB218357|Bcl2a1|Bfl-1|Hbpa1
Bcl2a1b	chr9	+	88995471	88996528	1.8	0.00198	88995471	88996528	1.11	0.00219	B-cell leukemia/lymphoma 2 related protein A1b	12045	A1-b
Bcl2a1a	chr9	+	88996771	88997220	2.46	0	88996771	88997220	1.61	0.00245	B-cell leukemia/lymphoma 2 related protein A1a	12044	A1|BB218357|Bcl2a1|Bfl-1|Hbpa1
Bcl2a1b	chr9	+	88996771	88997220	2.46	0	88996771	88997220	1.61	0.00245	B-cell leukemia/lymphoma 2 related protein A1b	12045	A1-b
Plscr1	chr9	+	92053768	92054117	2.04	0.000699	92053768	92054717	1.38	0.00346	phospholipid scramblase 1	22038	MmTRA1a|MmTRA1b|NOR1|TRA1|Tras1|Tras2
Ky	chr9	+	102397836	102398285	2.37	0	102397836	102398285	2.17	0	kyphoscoliosis peptidase	16716	CD1|D9Mgc44e|ky
Bfsp2	chr9	-	103307396	103308145	1.89	0	103307196	103308245	1.8	0	"beaded filament structural protein 2, phakinin"	107993	5830418P13Rik|AI448593|CP49
Aste1	chr9	+	105253464	105253913	1.8	0.00198	105253364	105253713	1.57	0.00239	asteroid homolog 1 (Drosophila)	66595	1100001A21Rik|AV006403|MGC107393
Nek11	chr9	-	105253464	105253913	1.8	0.00198	105253364	105253713	1.57	0.00239	NIMA (never in mitosis gene a)-related expressed kinase 11	208583	4932416N14Rik
Ppm1m	chr9	-	106057893	106058342	3.03	0	106057993	106058342	2.63	0	protein phosphatase 1M	67905	2810423O19Rik|AW610647|C77250|PP2Ceta
Ptk9l	chr9	+	106057893	106058342	3.03	0	106057993	106058342	2.63	0	protein tyrosine kinase 9-like (A6-related protein)	23999	A6-related|AU014993|Ptk9r|Twf2
Tlr9	chr9	+	106080466	106080815	2.89	0	106080466	106080815	3.09	0	toll-like receptor 9	81897	-
Abhd14a	chr9	-	106310312	106310661	2.04	0.000699	106310312	106310661	2.44	0	abhydrolase domain containing 14A	68644	1110013B16Rik|AW558221|Dorz1
Pcbp4	chr9	+	106310312	106310661	2.04	0.000699	106310312	106310661	2.44	0	poly(rC) binding protein 4	59092	1200003L19Rik|AlphaCP-4
Rassf1	chr9	+	107413206	107413555	1.94	0.00102	107413206	107413555	1.71	0.00144	Ras association (RalGDS/AF-6) domain family 1	56289	123F2|AU044980|NORE2A|RDA32|REH3P21|Rassf1A|Rassf1B|Rassf1C
Gpx1	chr9	+	108197046	108197395	1.66	0.00331	108197046	108197395	1.38	0.00725	glutathione peroxidase 1	14775	AI195024|AL033363|CGPx|GPx-1|GSHPx-1|Gpx
Scotin	chr9	+	108907940	108909397	1.94	0	108908648	108909397	1.57	0.00239	scotin gene	66940	2310008D10Rik|6430628I05Rik
Scotin	chr9	+	108912072	108912421	1.47	0.00597	108912072	108912421	1.38	0.00725	scotin gene	66940	2310008D10Rik|6430628I05Rik
Trex1	chr9	-	108916607	108916956	2.27	0.000325	108916607	108916956	2.12	0	three prime repair exonuclease 1	22040	1661|AU041952
Dhx30	chr9	-	109963433	109963682	1.99	0.00128	109963433	109963682	1.57	0.00915	DEAH (Asp-Glu-Ala-His) box polypeptide 30	72831	2810477H02Rik|AA682062|AU015424|C130058C04Rik|Ddx30|HELG
4921528I07Rik	chr9	-	114167276	114167525	2.46	0	114166876	114167525	1.57	0.00915	RIKEN cDNA 4921528I07 gene	77049	-
Bcl2a1c	chr9	+	114178103	114178852	2.18	0.000759	114178003	114178952	1.47	0.00195	B-cell leukemia/lymphoma 2 related protein A1c	12046	A1-c
Azi2	chr9	+	117889363	117889712	2.56	0	117889463	117889812	2.3	0	5-azacytidine induced gene 2	27215	AA410145|AZ2
Oxsr1	chr9	-	119171318	119171667	1.75	0.00253	119171318	119171667	1.84	0.000468	oxidative-stress responsive 1	108737	2210022N24Rik|2810422B09Rik|AI462649|AW209236|Osr1|mKIAA1101
Ccbp2	chr9	+	121752419	121752868	1.94	0.00102	121752819	121753368	1.43	0.00544	chemokine binding protein 2	59289	AI464239|CCR10|CCR9|Cmkbr9|D6|MGC130576
Ccbp2	chr9	+	121752419	121752868	1.94	0.00102	121752019	121752468	1.75	0.000822	chemokine binding protein 2	59289	AI464239|CCR10|CCR9|Cmkbr9|D6|MGC130576
Snrk	chr9	+	121977449	121977799	2.08	0.00078	121977449	121977799	1.71	0.00144	SNF related kinase	20623	2010012F07Rik|AI448042|AW547029|E030034B15|MGC28970|R74830|mKIAA0096
Zfp445	chr9	-	122714499	122714848	2.37	0	122714499	122714848	1.61	0.00245	zinc finger protein 445	235682	AW610627|ZNF168|mszf29|mszf50
Tmem42	chr9	-	122869525	122869874	1.75	0.00253	122869625	122869974	1.34	0.00946	transmembrane protein 42	66079	0610027O18Rik|4933429E06Rik|AV003444|D9Ertd662e|MGC29956
Tmem42	chr9	+	122869525	122869874	1.75	0.00253	122869625	122869974	1.34	0.00946	transmembrane protein 42	66079	0610027O18Rik|4933429E06Rik|AV003444|D9Ertd662e|MGC29956
Exosc7	chr9	+	122960578	122961627	1.47	0	122960378	122961527	1.01	0	exosome component 7	66446	2610002K22Rik|AV212732|mKIAA0116
Zdhhc3	chr9	-	122960578	122961627	1.47	0	122960378	122961527	1.01	0	"zinc finger, DHHC domain containing 3"	69035	1110020O22Rik|1810006O10Rik|2210017C02Rik|GODZ|Gramp1|Zfp373
Ccr1	chr9	-	123817243	123817692	1.8	0.00198	123817043	123817592	1.71	0.00144	chemokine (C-C motif) receptor 1	12768	Cmkbr1|Mip-1a-R
Plp2	chrX	-	6830606	6831055	1.84	0.000795	6830406	6830855	1.56	0.00145	proteolipid protein 2	18824	MGC102445|MGC103126|mIMA4
Gripap1	chrX	+	6946558	6947207	1.84	0	6946458	6946813	1.35	0.00544	GRIP1 associated protein 1	54645	AI854681|DXImx47e|GRASP-1|Sfc10|mKIAA1167
Pqbp1	chrX	-	7055806	7056155	1.67	0.00198	7055806	7056255	1.43	0.00294	polyglutamine binding protein 1	54633	PQBP-1|Sfc2
Timm17b	chrX	+	7055806	7056155	1.67	0.00198	7055806	7056255	1.43	0.00294	translocase of inner mitochondrial membrane 17b	21855	17kDa|Sfc3|mTim17b
Was	chrX	-	7247261	7247610	1.8	0.00102	7247361	7247710	2.08	0	Wiskott-Aldrich syndrome homolog (human)	22376	U42471|Wasp
Ebp	chrX	-	7349689	7350038	1.75	0.00102	7349689	7350038	1.43	0.00294	phenylalkylamine Ca2+ antagonist (emopamil) binding protein	13595	AI255399|Pabp|Td|mSI
Cybb	chrX	-	8627776	8628130	1.75	0.00102	8627776	8628130	1.56	0.00145	"cytochrome b-245, beta polypeptide"	13058	C88302|Cgd|Nox2|gp91<phox>|gp91phox
Bcor	chrX	-	11239179	11239634	1.97	0.000678	11239079	11239428	1.91	0	Bcl6 interacting corepressor	71458	5830466J11Rik|8430401K06Rik|D930024N20Rik|mKIAA1575
Cfp	chrX	-	20088415	20089264	3.73	0	20088415	20089264	3.3	0	complement factor properdin	18636	BCFG|Pfc
Utp14a	chrX	+	44501310	44501763	2.06	0.000277	44501410	44501763	1.69	0.000435	"UTP14, U3 small nucleolar ribonucleoprotein, homolog A (yeast)"	72554	2700066J21Rik|JsdX|KIAA0266|MGC105191|NY-CO-16|SDCCAG16|T25628|mKIAA0266
Arhgef6	chrX	-	53684763	53685915	1.58	0	53685463	53685915	1.35	0.00544	Rac/Cdc42 guanine nucleotide exchange factor (GEF) 6	73341	1600028C08Rik|1700038J06Rik|4930592P22Rik
Bcap31	chrX	-	69971375	69971733	3.2	0	69971375	69971733	2.78	0	B-cell receptor-associated protein 31	27061	Bap31
Rpl10	chrX	+	70523126	70523475	2.15	0	70523226	70523677	2.13	0	ribosomal protein 10	110954	D0HXS648|D3Ucla2|DXHXS648|DXHXS648E|MGC107630|QM|QM16
Vbp1	chrX	+	71766700	71767449	1.58	0.00293	71766900	71767449	1.61	0	von Hippel-Lindau binding protein 1	22327	-
Tbl1x	chrX	+	73761681	73763030	1.32	0.00521	73761481	73763130	1.22	0	transducin (beta)-like 1 X-linked	21372	5330429M20|Tbl1
5430427O19Rik	chrX	+	82122141	82123090	1.93	0.00078	82122641	82122992	1.43	0.00294	RIKEN cDNA 5430427O19 gene	71398	-
Pola1	chrX	-	89884224	89885173	1.32	0.00805	89884524	89885073	1.39	0.00418	"polymerase (DNA directed), alpha 1"	18968	AW321876|Pola
Zfx	chrX	-	90378106	90378958	2.06	0.000277	90378606	90378958	2.39	0	zinc finger protein X-linked	22764	"Zfx5|Zfx5,6|Zfx6"
Ercc6l	chrX	-	98359695	98360248	2.1	0	98359795	98360248	1.95	0	excision repair cross-complementing rodent repair deficiency complementation group 6 - like	236930	BC004701|D330021P09Rik|MGC7766
Atp7a	chrX	+	102229585	102230634	1.32	0.00805	102229585	102230034	1.3	0.00725	"ATPase, Cu++ transporting, alpha polypeptide"	11977	Blo|DXHXS1608e|I14|MNK|Mo|blotchy|br|brindled|mottled
P2ry10	chrX	+	103291903	103292455	1.71	0	103291903	103292254	1.48	0.00239	"purinergic receptor P2Y, G-protein coupled 10"	78826	5830408N17Rik|P2Y10
A630033H20Rik	chrX	+	103352483	103352933	1.45	0.0042	103352283	103352933	1.35	0.00544	RIKEN cDNA A630033H20 gene	213438	-
Btk	chrX	-	129929264	129929616	2.15	0	129929364	129929813	1.61	0.00144	Bruton agammaglobulinemia tyrosine kinase	12229	AI528679|xid
Rpl36a	chrX	+	129929264	129929616	2.15	0	129929364	129929813	1.61	0.00144	ribosomal protein L36a	19982	L44L|Rpl44
Ctps2	chrX	+	158246294	158246543	3.11	0	158246294	158246543	2.91	0	cytidine 5'-triphosphate synthase 2	55936	CTPsH
Tmsb4x	chrX	-	162554289	162554638	2.54	0	162554289	162554638	2	0	"thymosin, beta 4, X chromosome"	19241	Ptmb4
Arhgap6	chrX	+	164454201	164454550	1.97	0.000678	164454201	164454550	1.43	0.00294	Rho GTPase activating protein 6	11856	AI504284|C130038E13|RhoGAPX-1
